# Supplementary material for: Characterisation and genome sequence of the lytic Acinetobacter baumannii bacteriophage vB_AbaS_Loki
Source: PubMed Central journal article supplement (PMC5313236; doi:10.1371/journal.pone.0172303), 2017-02-16
Supplement: pone.0172303.s003.pdf [file pone.0172303.s003.pdf]

**Supplementary Table 1.** *Acinetobacter* sp. assessed by spot plate assay and efficiency of plating (EOP). Spot; + zone of lysis present, - no lysis observed. EOP; ratio of titre on test strain to titre obtained on propagating host as determined by overlay plaque assay, - no plaques observed. CL: International clonal lineage; CC: clonal complex; NA: not attributable.

| <b><i>Acinetobacter</i> isolate</b>       | <b>Relevant characteristics</b>  | <b>Source</b>           | <b>Spot assay</b> | <b>EOP</b> |
|-------------------------------------------|----------------------------------|-------------------------|-------------------|------------|
| <i>A. baumannii</i> AYE                   | Dark colony morphotype; CL-I     | ATCC BAA-1710           | +                 | -          |
| <i>A. baumannii</i> AYE                   | Light colony morphotype; CL-I    | ATCC BAA-1710           | +                 | -          |
| <i>A. baumannii</i> SDF                   | -                                | ATCC BAA-1709           | -                 | -          |
| <i>A. baumannii</i> CL 330/86             | Sporadic; NA                     | NCTC 12156              | +                 | -          |
| <i>A. baumannii</i>                       | Sporadic; NA                     | ATCC 17978              | +                 | 1          |
| <i>A. baumannii</i>                       | Colistin-resistant; Sporadic; NA | ATCC 17978 <i>lpxA</i>  | -                 | -          |
| <i>A. baumannii-calcoaceticus</i> SM37212 | -                                | North Bristol NHS Trust | +                 | -          |
| <i>A. baumannii</i>                       | OXA-23 clone 2                   | NCTC 13421              | +                 | -          |
| <i>A. baumannii</i>                       | OXA-25; CL-II                    | NCTC 13302              | +                 | -          |
| <i>A. baumannii</i> T-strain              | OXA-51-like; CL-II               | NCTC 13423              | +                 | -          |
| <i>A. baumannii</i> 3516/60               | NA                               | NCTC 10303              | +                 | -          |
| <i>A. baumannii</i>                       | OXA 23 clone 1                   | NCTC 13424              | +                 | -          |
| <i>A. baumannii</i> W-strain              | CL-1                             | Public Health England   | +                 | -          |
| <i>A. baumannii</i> UKA1                  | SEM clone; C-LII                 | Public Health England   | +                 | -          |
| <i>A. baumannii</i> UKA2                  | BAC-1; CL-II                     | Public Health England   | +                 | -          |
| <i>A. baumannii</i> UKA3                  | SEM clone; CL-II                 | Public Health England   | +                 | -          |
| <i>A. baumannii</i> UKA4                  | -                                | Public Health England   | *                 | -          |
| <i>A. baumannii</i> UKA5                  | EAC-6; CL-II                     | Public Health England   | +                 | -          |
| <i>A. baumannii</i> UKA6                  | FAC-25; NA                       | Public Health England   | -                 | -          |
| <i>A. baumannii</i> UKA7                  | OXA-23 clone 1                   | Public Health England   | +                 | -          |
| <i>A. baumannii</i> UKA8                  | SEM clone; CL-II                 | Public Health England   | +                 | -          |
| <i>A. baumannii</i> UKA9                  | Unique; NA                       | Public Health England   | +                 | -          |
| <i>A. baumannii</i> UKA10                 | OXA-23 clone 1; CL-II            | Public Health England   | +                 | -          |
| <i>A. baumannii</i> UKA11                 | GAC-9; NA                        | Public Health England   | +                 | -          |

|                                         |                                |                             |   |   |
|-----------------------------------------|--------------------------------|-----------------------------|---|---|
| <i>A. baumannii</i> UKA12               | FAC-24; CL-I                   | Public Health England       | + | - |
| <i>A. baumannii</i> UKA13               | FAC-24; CL-I                   | Public Health England       | + | - |
| <i>A. baumannii</i> UKA14               | GAC-9; NA                      | Public Health England       | + | - |
| <i>A. baumannii</i> UKA15               | GAC-9; NA                      | Public Health England       | + | - |
| <i>A. baumannii</i> UKA16               | FAC-16; CL-I                   | Public Health England       | + | - |
| <i>A. baumannii</i> UKA17               | Midlands 2; CL-III             | Public Health England       | + | - |
| <i>A. baumannii</i> UKA18               | AAC-1; CL-I                    | Public Health England       | + | - |
| <i>A. baumannii</i> UKA19               | NW strain; CL-II               | Public Health England       | + | - |
| <i>A. baumannii</i> UKA20               | -                              | Public Health England       | + | - |
| <i>A. baumannii</i> A318                | CC113                          | Universidad de Buenos Aires | + | - |
| <i>A. baumannii</i> A118                | Naturally competent            | Universidad de Buenos Aires | + | - |
| <i>A. baumannii</i> 211                 | -                              | Public Health England       | + | - |
| <i>A. baumannii</i> A600                | Colistin resistant; CL-I/CC109 | Universidad de Buenos Aires | + | - |
| <i>A. baumannii</i> A601                | Colistin sensitive; CL-II      | Universidad de Buenos Aires | + | - |
| <i>A. baylyi</i> ADP-1                  | -                              | ATCC 33305                  | + | - |
| <i>A. lwoffii</i>                       | -                              | NCTC 7976                   | + | - |
| <i>A. calcoaceticus</i>                 | -                              | NCTC 7461                   | + | - |
| <i>A. baumannii-calcoaceticus</i> 39558 | CL-I/CC109                     | Universidad de Buenos Aires | - | - |
