# Supplementary material for: Characterisation and genome sequence of the lytic Acinetobacter baumannii bacteriophage vB_AbaS_Loki
Source: PLoS One. 2017 Feb 16;12(2):e0172303. doi: 10.1371/journal.pone.0172303 (PMC5313236; doi:10.1371/journal.pone.0172303)
Supplement: S2 File — (XLSX) [file pone.0172303.s002.xlsx]

## Sheet: ORFs and Gene Products
ORF	Strand	Start	End	Length (nt)	Length (AA)	pI	MW	TMHMM	SignalP	Product
gp01	+	1	519	519	172	5.74	19299.8	-	-	putative terminase, small subunit
gp02	+	491	2077	1587	528	5.66	60460.1	-	-	putative terminase, large subunit
gp03	+	2090	3592	1503	500	4.88	56077.3	-	-	putative portal vertex protein
gp04	+	3579	4529	951	316	8.73	36161.4	-	-	putative head morphogenesis protein, SPP1 gp7 family
gp05	+	4540	5259	720	239	5.68	25959.2	-	-	putative scaffold protein
gp06	+	5272	6255	984	327	5.13	35151.2	-	-	putative major capsid protein
gp07	+	6314	6652	339	112	4.47	11893.1	-	-	hypothetical protein
gp08	+	6664	7152	489	162	4.8	17409	-	-	putative head-tail joining protein
gp09	+	7156	7539	384	127	5.87	14552.6	-	-	putative head-tail joining protein – minor capsid protein
gp10	+	7536	7979	444	147	5.72	16791	-	-	putative tail terminator protein
gp11	+	7993	9519	1527	508	4.65	53608.1	-	-	putative major tail protein
gp12	+	9589	10029	441	158	4.79	16671.7	-	-	putative tail assembly chaperone
gp13	+	9589	10376	789	263	5.12	29766.9	-	-	putative tail assembly chaperone
gp14	+	10387	10824	438	145	9.7	15303.7	-	-	putative tail completion protein
gp15	+	10826	14311	3486	1161	8.54	122029	4	-	putative tail tapemeasure protein
gp16	+	14313	14930	618	205	5.07	21740.7	-	-	putative distal tail protein
gp17	+	14917	17619	2703	900	4.76	101873	-	-	hypothetical protein
gp18	+	17622	18158	537	178	4.58	19820.5	-	-	hypothetical protein
gp19	+	18158	18592	435	144	5.19	16625.9	-	-	hypothetical protein
gp20	+	18593	21055	2463	820	4.76	89766.3	1	-	putative tail fibre protein
gp21	+	21055	21843	789	262	5.01	27513	-	-	hypothetical protein
gp22	-	22112	24067	1956	651	6.31	73905.9	-	-	putative DNA polymerase
gp23	-	24064	25062	999	332	6.89	36425	-	-	putative DNA polymerase III, beta subunit
gp24	-	25066	25449	384	127	6.03	14479.5	-	-	hypothetical protein
gp25	-	25446	25769	324	107	4.54	12400.9	-	-	hypothetical protein
gp26	-	25779	27431	1653	550	8.66	61848.1	-	-	putative helicase
gp27	-	27437	28381	945	314	7.55	35779.7	-	-	putative exonuclease
gp28	-	28451	29218	768	255	5.92	26480.5	-	-	putative single-stranded DNA-binding protein
gp29	-	29273	29953	681	226	9.19	25303.2	-	-	AAA domain protein
gp30	-	29961	30410	450	149	5.95	17349.9	-	-	hypothetical protein
gp31	-	30407	31063	657	218	5.73	24572.8	-	-	putative MazG nucleotide pyrophosphohydrolase
gp32	-	31090	33354	2265	754	6.15	85099.8	-	-	putative replicative primase
gp33	-	33341	33589	249	82	7.95	9236.65	-	-	putative DNA-binding protein
gp34	+	34308	34553	246	81	9.1	9332.99	-	-	hypothetical protein
gp35	+	34614	34730	117	38	9.46	4624.43	-	-	putative zinc-finger domain protein
gp36	+	34708	34923	216	71	6.9	7786.81	-	-	hypothetical protein
gp37	+	34927	35481	555	184	8.64	21571	-	-	hypothetical protein
gp38	+	35590	35904	315	104	5.59	11891.5	-	-	hypothetical protein
gp39	+	35906	36124	219	72	4.81	7956.21	-	-	hypothetical protein
gp40	+	36172	36627	456	151	4.98	16790.1	-	-	hypothetical protein
gp41	+	36684	36956	273	90	4.53	10152.7	-	-	hypothetical protein
gp42	+	36959	37600	642	213	8.61	23563	-	-	putative VRR-NUC domain protein
gp43	+	37597	37797	201	66	6.24	8049.99	-	-	hypothetical protein
gp44	+	37840	38124	285	94	4.03	10890.7	-	-	hypothetical protein
gp45	+	38129	38692	564	187	8.41	20791.7	-	-	hypothetical protein
gp46	+	38689	39045	357	118	4.58	13149.9	-	-	hypothetical protein
gp47	+	39042	39224	183	60	5.58	6892.83	1	-	hypothetical protein
gp48	+	39286	39882	597	198	4.92	21224.4	-	-	hypothetical protein
gp49	+	40108	40464	357	118	6.31	13639.7	1	-	hypothetical protein
gp50	+	40439	40681	243	80	9.99	9250.2	2	-	putative holin, class II
gp51	+	40686	41234	549	182	9.13	20613.5	-	-	putative endolysin; N-acetylmuraminidase, PG-binding

## Sheet: BLASTP
Query ID	% Identical matches	Alignment Length	No. of mismatches	No. of gap openings	Start of alignment in query	End of alignment in query	Start of alignment in subkect	End of alignment in subject	E-value	Bit score	Subject Accessions	Subject Descriptions
Loki_gp01	100	172	0	0	1	172	1	172	7e-125	357	gi|949419292|emb|CUS06462.1|	putative terminase, small subunit [unclassified Siphoviridae]
Loki_gp01	66.86	172	55	1	1	172	1	170	5e-82	248	gi|589892181|ref|YP_009008546.1|;gi|583926735|gb|AHI60041.1|	putative terminase small subunit [Acinetobacter phage IME_AB3]<>putative terminase small subunit [Acinetobacter phage IME_AB3]
Loki_gp01	31.88	138	89	4	25	159	13	148	2e-10	65.9	gi|1015669848|gb|AMW36121.1|	putative small terminase [Xanthomonas phage XAJ2]
Loki_gp01	26.76	142	98	3	25	160	14	155	0.0003	48.9	gi|971751698|ref|YP_009205601.1|;gi|936761536|gb|ALH23595.1|	putative terminase small subunit [Pseudomonas phage PaMx42]<>putative terminase small subunit [Pseudomonas phage PaMx42]
Loki_gp01	28.67	143	98	4	19	159	5	145	0.003	46.2	gi|1088494518|gb|OHD25440.1|	hypothetical protein A2Y38_12840 [Spirochaetes bacterium GWB1_59_5]
Loki_gp02	100	528	0	0	1	528	1	528	0	1093	gi|949419293|emb|CUS06463.1|	putative terminase, large subunit [unclassified Siphoviridae]
Loki_gp02	88.64	528	59	1	1	527	1	528	0	957	gi|589892180|ref|YP_009008545.1|;gi|583926734|gb|AHI60040.1|	putative terminase large subunit [Acinetobacter phage IME_AB3]<>putative terminase large subunit [Acinetobacter phage IME_AB3]
Loki_gp02	57.09	529	213	5	11	527	8	534	0	622	gi|910307491|gb|AKU43190.1|	terminase large subunit [Rhodobacter phage RcSpartan]
Loki_gp02	58.05	522	206	5	9	525	23	536	0	621	gi|764162029|ref|YP_009126425.1|;gi|746947747|gb|AJD83159.1|	terminase large subunit [Paracoccus phage vB_PmaS_IMEP1]<>terminase large subunit [Paracoccus phage vB_PmaS_IMEP1]
Loki_gp02	56.18	534	220	5	6	527	5	536	0	615	gi|985760151|ref|YP_009225672.1|;gi|910307308|gb|AKU43024.1|	terminase large subunit [Rhodobacter phage RcTitan]<>terminase large subunit [Rhodobacter phage RcTitan]
Loki_gp02	59.19	517	193	5	11	525	12	512	0	604	gi|1088494519|gb|OHD25441.1|	terminase [Spirochaetes bacterium GWB1_59_5]
Loki_gp02	57.12	520	205	5	1	520	1	502	0	582	gi|146329916|ref|YP_001210224.1|;gi|145321092|gb|ABP63575.1|	BcepGomrgp04 [Burkholderia phage BcepGomr]<>BcepGomrgp04 [Burkholderia phage BcepGomr]
Loki_gp02	56.05	521	212	6	12	527	37	545	0	577	gi|399528721|ref|YP_006560758.1|;gi|371767557|gb|AEX56091.1|	terminase large subunit [Burkholderia phage KL1]<>terminase large subunit [Burkholderia phage KL1]
Loki_gp02	55.32	517	214	7	11	527	28	527	0	551	gi|971821759|ref|YP_009220341.1|;gi|827196339|gb|AKJ71365.1|	terminase large subunit [Achromobacter phage phiAxp-1]<>terminase large subunit [Achromobacter phage phiAxp-1]
Loki_gp02	53.52	525	224	7	11	527	18	530	0	542	gi|971766230|ref|YP_009219164.1|;gi|823081379|gb|AKI28735.1|	large terminase subunit [Stenotrophomonas phage vB_SmaS-DLP_2]<>large terminase subunit [Stenotrophomonas phage vB_SmaS-DLP_2]
Loki_gp02	53.52	525	224	7	11	527	18	530	0	540	gi|701904470|gb|AIW01671.1|	terminase-like family protein [Pseudomonas phage vB_Pae_PS9N]
Loki_gp02	53.52	525	224	7	11	527	18	530	0	540	gi|823081438|gb|AKI28793.1|	large terminase subunit [Stenotrophomonas phage vB_SmaS-DLP_1]
Loki_gp02	53.33	525	225	7	11	527	18	530	0	540	gi|658311464|ref|YP_009044341.1|;gi|656178006|emb|CDN96767.1|	large terminase subunit [Pseudomonas phage vB_PaeS_SCH_Ab26]<>large terminase subunit [Pseudomonas phage vB_PaeS_SCH_Ab26]
Loki_gp02	53.52	525	224	7	11	527	18	530	0	539	gi|148912834|ref|YP_001293413.1|;gi|388542666|ref|YP_006299871.1|;gi|378407734|gb|AFB83295.1|	hypothetical protein ORF006 [Pseudomonas phage 73]<>large terminase subunit [Pseudomonas phage vB_Pae-Kakheti25]<>large terminase subunit [Pseudomonas phage vB_Pae-Kakheti25]
Loki_gp02	52.76	525	228	7	11	527	24	536	0	534	gi|971751697|ref|YP_009205602.1|;gi|936761535|gb|ALH23594.1|	putative terminase large subunit [Pseudomonas phage PaMx42]<>putative terminase large subunit [Pseudomonas phage PaMx42]
Loki_gp02	51.12	538	241	7	1	526	4	531	0	531	gi|1015669849|gb|AMW36122.1|	terminase large subunit [Xanthomonas phage XAJ2]
Loki_gp02	49.54	541	224	13	1	521	3	514	1e-165	488	gi|849060473|ref|YP_009151946.1|;gi|701946773|gb|AIW03865.1|	TerL [Escherichia phage Seurat]<>TerL [Escherichia phage Seurat]
Loki_gp02	49.54	541	224	13	1	521	3	514	1e-165	488	gi|971747729|ref|YP_009201584.1|;gi|936910464|emb|CUL01079.1|	terminase large subunit [Enterobacteria phage 9g] [Escherichia phage slur01]<>terminase large subunit [Enterobacteria phage 9g] [Escherichia phage slur01]
Loki_gp02	50.09	531	216	13	11	521	4	505	4e-164	484	gi|1049308748|gb|ANY29795.1|	terminase large subunit [Escherichia phage Greed]
Loki_gp02	49.91	531	217	13	11	521	4	505	7e-164	483	gi|971742341|ref|YP_009196796.1|;gi|768214044|gb|AJT60487.1|	terminase large subunit [Escherichia phage CAjan]<>terminase large subunit [Escherichia phage CAjan]
Loki_gp02	48.85	520	241	10	10	520	16	519	8e-164	484	gi|1041568405|gb|ANO57526.1|	terminase large subunit [Vibrio phage vB_VhaS-tm]
Loki_gp02	47.19	534	232	9	10	519	4	511	1e-161	478	gi|836630810|ref|WP_047780529.1|;gi|827401629|gb|AKJ41789.1|	terminase [Pragia fontium]<>terminase [Pragia fontium]
Loki_gp02	46.78	528	231	9	11	514	5	506	7e-160	473	gi|738956708|ref|WP_036841103.1|;gi|662546893|gb|KER01527.1|	terminase [Photorhabdus temperata]<>Terminase-like family [Photorhabdus temperata subsp. temperata Meg1]
Loki_gp02	46.28	538	235	9	10	519	4	515	2e-159	472	gi|1130352507|emb|SIP75037.1|	conserved hypothetical protein [Xenorhabdus innexi]
Loki_gp02	47.57	536	240	11	1	521	1	510	3e-159	472	gi|764162165|ref|YP_009126535.1|;gi|676402129|gb|AIM40562.1|	terminase large subunit [Vibrio phage VpKK5]<>terminase large subunit [Vibrio phage VpKK5]
Loki_gp02	46.8	532	229	9	10	513	4	509	7e-159	471	gi|928870071|ref|WP_053908896.1|;gi|928452411|gb|KPD01958.1|	terminase [Moellerella wisconsensis]<>phage terminase large subunit [Moellerella wisconsensis ATCC 35017]
Loki_gp02	46.38	539	239	9	10	524	4	516	2e-158	470	gi|912434153|ref|WP_050162838.1|;gi|893217591|emb|CNL29624.1|	terminase [Yersinia enterocolitica]<>putative phage terminase large subunit [Yersinia enterocolitica]
Loki_gp02	46.11	540	237	9	11	522	5	518	2e-158	469	gi|556337477|ref|WP_023297284.1|;gi|555045042|gb|ESL89331.1|	hypothetical protein [Klebsiella pneumoniae]<>hypothetical protein L421_01635 [Klebsiella pneumoniae UCICRE 10]
Loki_gp02	46.57	539	238	10	10	524	4	516	3e-158	469	gi|951139548|ref|WP_057621133.1|;gi|805200993|emb|CRE89497.1|	terminase [Yersinia enterocolitica]<>putative phage terminase large subunit [Yersinia enterocolitica]
Loki_gp02	46.57	539	238	9	10	524	4	516	4e-158	469	gi|520845867|ref|WP_020303627.1|;gi|511333854|gb|EFV40456.2|	hypothetical protein [Enterobacteriaceae bacterium 9_2_54FAA]<>hypothetical protein HMPREF0864_02187 [Enterobacteriaceae bacterium 9_2_54FAA]
Loki_gp02	46.11	540	237	9	11	522	5	518	4e-158	469	gi|636832941|ref|WP_024358946.1|	terminase [Klebsiella michiganensis]
Loki_gp02	46.54	535	232	9	11	517	5	513	5e-158	469	gi|1123847850|ref|WP_074385050.1|;gi|1031756729|emb|SBN30327.1|	terminase [Klebsiella pneumoniae]<>conserved hypothetical protein [Klebsiella pneumoniae]
Loki_gp02	46.2	539	240	10	10	524	4	516	6e-158	469	gi|500140474|ref|WP_011816477.1|;gi|123442572|ref|YP_001006549.1|;gi|122089533|emb|CAL12381.1|;gi|755409384|gb|AJJ22397.1|	phage terminase large subunit [Yersinia enterocolitica]<>phage terminase large subunit [Yersinia enterocolitica subsp. enterocolitica 8081]<>putative phage terminase large subunit [Yersinia enterocolitica subsp. enterocolitica 8081]<>terminase-like family protein [Yersinia enterocolitica]
Loki_gp02	46.33	531	235	9	11	517	5	509	9e-158	468	gi|748798033|ref|WP_040046012.1|;gi|743070857|gb|KID03542.1|	terminase [Hafnia alvei]<>terminase [Hafnia alvei]
Loki_gp02	46.11	540	237	9	11	522	5	518	1e-157	468	gi|1129433657|ref|WP_075394840.1|;gi|1127818522|gb|APS96465.1|	terminase [Klebsiella pneumoniae]<>terminase [Klebsiella pneumoniae]
Loki_gp02	46.17	535	234	9	11	517	5	513	1e-157	468	gi|745786191|ref|WP_039079603.1|	terminase [Enterobacter sp. Bisph2]
Loki_gp02	45.93	540	238	9	11	522	5	518	1e-157	468	gi|695765504|ref|WP_032688537.1|;gi|619495952|gb|KAJ95689.1|	terminase [Raoultella ornithinolytica]<>terminase [Raoultella ornithinolytica]
Loki_gp02	46.36	535	233	9	11	517	5	513	1e-157	468	gi|749547754|ref|WP_040181332.1|;gi|1062703650|gb|AOM88927.1|;gi|1062712696|gb|AOM97591.1|;gi|1062714213|gb|AOM98890.1|	terminase [Klebsiella pneumoniae]<>terminase [Klebsiella pneumoniae]<>terminase [Klebsiella pneumoniae]<>terminase [Klebsiella pneumoniae]
Loki_gp02	46.99	532	228	9	10	513	4	509	1e-157	468	gi|810382486|ref|WP_046334544.1|;gi|806987212|gb|KKC60169.1|	terminase [Proteus mirabilis]<>terminase [Proteus mirabilis]
Loki_gp02	46.11	540	237	9	11	522	5	518	1e-157	468	gi|742850753|ref|WP_038989560.1|;gi|1030374587|emb|SAT13983.1|	terminase [Klebsiella pneumoniae]<>Terminase-like family [Klebsiella pneumoniae]
Loki_gp02	46.36	535	233	9	11	517	5	513	1e-157	468	gi|896087757|ref|WP_049126031.1|;gi|1030910725|emb|SAV57644.1|	hypothetical protein [Klebsiella pneumoniae]<>Terminase-like family [Klebsiella pneumoniae]
Loki_gp02	46.36	535	233	9	11	517	5	513	1e-157	468	gi|779834036|ref|WP_045341949.1|;gi|771186687|gb|KJN37108.1|;gi|1017668102|emb|SAA89547.1|	MULTISPECIES: terminase [Enterobacter cloacae complex]<>terminase [Enterobacter hormaechei subsp. steigerwaltii]<>Terminase-like family [Enterobacter cloacae]
Loki_gp02	46.36	535	233	9	11	517	5	513	1e-157	468	gi|657704912|ref|WP_029503699.1|;gi|1044258713|emb|SBY10642.1|;gi|1044269427|emb|SBX80349.1|	terminase [Klebsiella pneumoniae]<>Terminase-like family [Klebsiella pneumoniae]<>Terminase-like family [Klebsiella pneumoniae]
Loki_gp02	46.99	532	228	9	10	513	4	509	2e-157	468	gi|983384308|ref|WP_060561419.1|;gi|960701039|gb|KSX91906.1|	terminase [Providencia stuartii]<>terminase [Providencia stuartii]
Loki_gp02	46.01	539	241	9	10	524	4	516	2e-157	467	gi|914221064|ref|WP_050537070.1|;gi|899858539|emb|CQR03525.1|	terminase [Yersinia mollaretii]<>putative phage terminase large subunit [Yersinia mollaretii]
Loki_gp02	46.17	535	234	9	11	517	5	513	3e-157	467	gi|836591708|ref|WP_047748755.1|	terminase [Enterobacter cloacae complex sp. GN02692]
Loki_gp02	46.11	540	237	9	11	522	5	518	3e-157	467	gi|1031812690|ref|WP_064141859.1|;gi|1031339212|emb|SAX96510.1|	hypothetical protein [Klebsiella pneumoniae]<>Terminase-like family [Klebsiella pneumoniae]
Loki_gp02	46.17	535	234	9	11	517	5	513	4e-157	467	gi|1102011888|ref|WP_071561103.1|;gi|1118864450|gb|OKN11633.1|	terminase [Klebsiella pneumoniae]<>hypothetical protein AM337_000545 [Klebsiella pneumoniae]
Loki_gp02	46	537	236	9	9	517	3	513	4e-157	467	gi|1027679500|ref|WP_063618544.1|;gi|1017659098|emb|SAA31396.1|	hypothetical protein [Enterobacter cloacae]<>Terminase-like family [Enterobacter cloacae]
Loki_gp02	46.17	535	234	9	11	517	5	513	4e-157	467	gi|1001754453|ref|WP_061301252.1|;gi|1000444521|gb|KXL18324.1|	terminase [Escherichia coli]<>terminase [Escherichia coli]
Loki_gp02	45.93	540	238	9	11	522	5	518	4e-157	466	gi|1033063474|ref|WP_064374482.1|	hypothetical protein [Klebsiella michiganensis]
Loki_gp02	45.74	540	239	9	11	522	5	518	4e-157	466	gi|695835064|ref|WP_032748442.1|	terminase [Klebsiella michiganensis]
Loki_gp02	46.17	535	234	9	11	517	5	513	4e-157	466	gi|852127780|ref|WP_048291432.1|;gi|839599942|gb|KMG75053.1|	terminase [Klebsiella pneumoniae]<>hypothetical protein SM58_00528 [Klebsiella pneumoniae]
Loki_gp02	45.98	535	235	9	11	517	5	513	4e-157	466	gi|779818399|ref|WP_045336318.1|	terminase [Enterobacter cloacae complex sp. 42192]
Loki_gp02	46.1	538	236	9	10	519	4	515	5e-157	466	gi|1097307047|emb|SFU43652.1|	Terminase-like family protein [Xenorhabdus koppenhoeferi]
Loki_gp02	45.98	535	235	9	11	517	5	513	5e-157	466	gi|980940081|ref|WP_059364084.1|	terminase [Enterobacter cloacae complex sp. GN02693]
Loki_gp02	46.97	528	230	9	10	513	4	505	5e-157	466	gi|912842944|ref|WP_050287945.1|;gi|893346375|emb|CNH55829.1|	terminase [Yersinia intermedia]<>putative phage terminase large subunit [Yersinia intermedia]
Loki_gp02	46.36	535	233	9	11	517	5	513	5e-157	466	gi|1031834966|ref|WP_064160705.1|;gi|1030848029|emb|SAS96834.1|	hypothetical protein [Klebsiella pneumoniae]<>Terminase-like family [Klebsiella pneumoniae]
Loki_gp02	45.74	540	239	9	11	522	5	518	6e-157	466	gi|798931388|ref|WP_045907339.1|;gi|794234074|gb|KJW92562.1|	terminase [Enterobacter hormaechei]<>terminase [Enterobacter hormaechei subsp. steigerwaltii]
Loki_gp02	46.17	535	234	9	11	517	5	513	6e-157	466	gi|1031874946|ref|WP_064189752.1|;gi|1031193321|emb|SAX91496.1|	hypothetical protein [Klebsiella pneumoniae]<>Terminase-like family [Klebsiella pneumoniae]
Loki_gp02	46.97	528	230	9	10	513	4	505	7e-157	466	gi|1103718539|ref|WP_071680655.1|;gi|1103047252|gb|OIX96226.1|	terminase [Serratia fonticola]<>terminase [Serratia fonticola]
Loki_gp02	45.98	535	235	9	11	517	5	513	7e-157	466	gi|1031875987|ref|WP_064190591.1|;gi|1030371126|emb|SAS36179.1|	hypothetical protein [Klebsiella pneumoniae]<>Terminase-like family [Klebsiella pneumoniae]
Loki_gp02	46.97	528	230	9	10	513	4	505	8e-157	466	gi|518038931|ref|WP_019209139.1|	terminase [Yersinia massiliensis]
Loki_gp02	46.5	529	233	9	10	514	4	506	8e-157	466	gi|912932793|ref|WP_050312814.1|;gi|812054131|emb|CNB32748.1|;gi|814129221|emb|CNF83189.1|;gi|872006835|emb|CRX55971.1|;gi|893374809|emb|CNC77531.1|;gi|900031798|emb|CQR16425.1|	MULTISPECIES: terminase [Yersinia]<>putative phage terminase large subunit [Yersinia enterocolitica]<>putative phage terminase large subunit [Yersinia intermedia]<>putative phage terminase large subunit [Yersinia enterocolitica]<>putative phage terminase large subunit [Yersinia intermedia]<>putative phage terminase large subunit [Yersinia enterocolitica]
Loki_gp02	46.5	529	233	9	10	514	4	506	8e-157	466	gi|912862541|ref|WP_050298213.1|;gi|892984801|emb|CNG23252.1|	terminase [Yersinia enterocolitica]<>putative phage terminase large subunit [Yersinia enterocolitica]
Loki_gp02	46.17	535	234	9	11	517	5	513	8e-157	466	gi|694098340|ref|WP_032442353.1|;gi|583476821|gb|EWD40736.1|;gi|1030654483|emb|SAT03246.1|	terminase [Klebsiella pneumoniae]<>hypothetical protein P837_02544 [Klebsiella pneumoniae UCI 34]<>Terminase-like family [Klebsiella pneumoniae]
Loki_gp02	45.79	535	236	9	11	517	5	513	9e-157	466	gi|829906557|ref|WP_047361819.1|;gi|829395396|gb|KLQ86856.1|;gi|974815221|gb|KUP99513.1|	terminase [Enterobacter kobei]<>terminase [Enterobacter kobei]<>terminase [Enterobacter kobei]
Loki_gp02	45.98	535	235	9	11	517	5	513	9e-157	466	gi|746214667|ref|WP_039266651.1|;gi|734998074|gb|KHO35588.1|;gi|1101769459|gb|OIR50276.1|	MULTISPECIES: terminase [Enterobacteriaceae]<>terminase [Enterobacter sp. FB]<>terminase [Lelliottia nimipressuralis]
Loki_gp02	46.17	535	234	9	11	517	5	513	1e-156	466	gi|639443659|ref|WP_024622710.1|;gi|960730699|gb|KSY20706.1|;gi|1030624900|emb|SBI34718.1|;gi|1030679094|emb|SAV33985.1|;gi|1030706040|emb|SBI16947.1|;gi|1030928104|emb|SBI08913.1|;gi|1031033664|emb|SBK11778.1|;gi|1044204146|emb|SBX22014.1|;gi|1044247351|emb|SBY21936.1|;gi|1044275699|emb|SBY12539.1|;gi|1044283927|emb|SBZ82382.1|;gi|1081991312|emb|SAR34069.1|;gi|1082091397|emb|SAR79787.1|	terminase [Klebsiella pneumoniae]<>terminase [Klebsiella pneumoniae]<>Terminase-like family [Klebsiella pneumoniae]<>Terminase-like family [Klebsiella pneumoniae]<>Terminase-like family [Klebsiella pneumoniae]<>Terminase-like family [Klebsiella pneumoniae]<>Terminase-like family [Klebsiella pneumoniae]<>Terminase-like family [Klebsiella pneumoniae]<>Terminase-like family [Klebsiella pneumoniae]<>…
Loki_gp02	45.98	535	235	9	11	517	5	513	1e-156	465	gi|694083787|ref|WP_032428657.1|;gi|583627441|gb|EWE90106.1|	terminase [Klebsiella pneumoniae]<>hypothetical protein L438_06980 [Klebsiella pneumoniae BIDMC 11]
Loki_gp02	46.17	535	234	9	11	517	5	513	1e-156	465	gi|740649553|ref|WP_038434995.1|;gi|694260264|gb|KGJ45700.1|;gi|694262125|gb|KGJ47540.1|;gi|723252264|gb|AIX84888.1|;gi|736268397|gb|KHQ24497.1|;gi|770616443|gb|KJL14231.1|;gi|770619198|gb|KJL16975.1|;gi|839630247|gb|KMH04953.1|;gi|1030523803|emb|SAT83916.1|;gi|1030777685|emb|SAT63426.1|;gi|1030859983|emb|SAW74595.1|;gi|1030881515|emb|SAT62517.1|;gi|1030935508|emb|SAV84534.1|;gi|1030954434|emb|SA…	terminase [Klebsiella pneumoniae]<>terminase [Klebsiella pneumoniae]<>terminase [Klebsiella pneumoniae]<>terminase [Klebsiella pneumoniae subsp. pneumoniae]<>terminase [Klebsiella pneumoniae]<>terminase [Klebsiella pneumoniae]<>terminase [Klebsiella pneumoniae]<>hypothetical protein SM63_00994 [Klebsiella pneumoniae]<>Terminase-like family [Klebsiella pneumoniae]<>Terminase-like family [Klebsiell…
Loki_gp02	46.17	535	234	9	11	517	5	513	1e-156	465	gi|1079184994|gb|OFI13339.1|	terminase [Klebsiella pneumoniae]
Loki_gp02	45.76	542	240	9	11	524	5	520	2e-156	465	gi|1042741428|ref|WP_065304111.1|;gi|1042327791|gb|ANQ00939.1|	terminase [Escherichia coli]<>terminase [Escherichia coli]
Loki_gp02	46.37	537	238	9	10	522	4	514	2e-156	464	gi|815726115|ref|WP_046457131.1|;gi|815024091|gb|KKI48999.1|	terminase [Hafnia alvei]<>terminase [Hafnia alvei]
Loki_gp02	45.93	540	238	9	11	522	5	518	2e-156	465	gi|490301224|ref|WP_004196622.1|;gi|459675054|gb|EMH91665.1|	hypothetical protein [Klebsiella pneumoniae]<>terminase-like family protein [Klebsiella pneumoniae JHCK1]
Loki_gp02	45.74	540	239	9	11	522	5	518	2e-156	465	gi|1033076030|ref|WP_064386380.1|;gi|1031327910|emb|SAQ14339.1|	hypothetical protein [Klebsiella oxytoca]<>Terminase-like family [Klebsiella oxytoca]
Loki_gp02	46.78	528	231	9	10	513	4	505	3e-156	464	gi|910784551|ref|WP_050089488.1|;gi|893361071|emb|CNK19860.1|	terminase [Yersinia intermedia]<>putative phage terminase large subunit [Yersinia intermedia]
Loki_gp02	46.08	536	239	9	11	522	5	514	3e-156	464	gi|970270500|ref|WP_058652728.1|;gi|967352306|gb|KTK24284.1|;gi|978067080|gb|KVJ72388.1|	terminase [Enterobacter hormaechei]<>terminase [Enterobacter hormaechei subsp. oharae]<>terminase [Enterobacter hormaechei subsp. oharae]
Loki_gp02	46.8	532	229	10	10	513	4	509	3e-156	464	gi|1012702169|ref|WP_062814388.1|	terminase [Proteus mirabilis]
Loki_gp02	46.43	532	231	9	11	514	5	510	4e-156	464	gi|836573982|ref|WP_047731804.1|;gi|829334603|gb|KLQ27066.1|	terminase [Enterobacter hormaechei]<>terminase [Enterobacter hormaechei subsp. steigerwaltii]
Loki_gp02	46.05	532	233	9	11	514	5	510	4e-156	464	gi|970318803|ref|WP_058686186.1|;gi|967169555|gb|KTI47622.1|	terminase [Enterobacter hormaechei]<>terminase [Enterobacter hormaechei subsp. steigerwaltii]
Loki_gp02	45.74	540	239	9	11	522	5	518	4e-156	464	gi|881037980|ref|WP_048757234.1|;gi|1130693813|gb|OLU18469.1|	MULTISPECIES: terminase [Enterobacteriaceae]<>terminase [Klebsiella michiganensis]
Loki_gp02	46.62	532	230	9	11	514	5	510	5e-156	464	gi|772676230|ref|WP_045286689.1|;gi|771163834|gb|KJN18991.1|;gi|937678521|gb|KPO12161.1|	MULTISPECIES: terminase [Enterobacteriaceae]<>terminase [Enterobacter cloacae complex sp. 35699]<>terminase [Escherichia coli]
Loki_gp02	46.62	532	230	9	11	514	5	510	5e-156	464	gi|555562468|ref|WP_023277177.1|;gi|554700340|gb|ESK05861.1|	hypothetical protein [Escherichia coli]<>hypothetical protein G723_03107 [Escherichia coli HVH 50 (4-2593475)]
Loki_gp02	46.21	528	234	9	11	514	5	506	5e-156	464	gi|1049325783|ref|WP_065822514.1|;gi|1049000829|gb|OCQ53573.1|	terminase [Photorhabdus asymbiotica]<>Terminase-like family protein [Photorhabdus asymbiotica subsp. australis]
Loki_gp02	45.56	540	240	9	11	522	5	518	5e-156	464	gi|1048227659|ref|WP_065802158.1|;gi|1044054969|emb|SBY74333.1|	terminase [Klebsiella pneumoniae]<>Terminase-like family [Klebsiella pneumoniae]
Loki_gp02	45.56	540	240	9	11	522	5	518	6e-156	463	gi|817653429|ref|WP_046619504.1|	terminase [Klebsiella pneumoniae]
Loki_gp02	46.24	532	232	9	11	514	5	510	7e-156	463	gi|1016933973|ref|WP_063136207.1|;gi|1015301321|emb|CZW93180.1|	terminase [Enterobacter cloacae]<>Terminase-like family [Enterobacter cloacae]
Loki_gp02	45.84	541	239	9	10	522	4	518	9e-156	463	gi|836616807|ref|WP_047767292.1|;gi|831635302|gb|KLU16501.1|;gi|923009994|gb|KOP32476.1|	MULTISPECIES: terminase [Xenorhabdus]<>terminase [Xenorhabdus griffiniae]<>terminase [Xenorhabdus sp. GDc328]
Loki_gp02	45.98	535	235	9	11	517	5	513	1e-155	463	gi|1033035956|ref|WP_064351690.1|;gi|1031459351|emb|SBL29666.1|;gi|1031465090|emb|SAP40873.1|;gi|1031501890|emb|SAP48634.1|;gi|1031508232|emb|SAP68766.1|;gi|1031515634|emb|SAP38676.1|;gi|1031528695|emb|SBL29226.1|;gi|1031540228|emb|SAP56398.1|;gi|1031547856|emb|SAQ18620.1|;gi|1031554171|emb|SAQ21250.1|;gi|1031561599|emb|SAP40696.1|;gi|1031567892|emb|SAP76782.1|;gi|1031581815|emb|SAP38056.1|;gi|10…	hypothetical protein [Klebsiella oxytoca]<>Terminase-like family [Klebsiella oxytoca]<>Terminase-like family [Klebsiella oxytoca]<>Terminase-like family [Klebsiella oxytoca]<>Terminase-like family [Klebsiella oxytoca]<>Terminase-like family [Klebsiella oxytoca]<>Terminase-like family [Klebsiella oxytoca]<>Terminase-like family [Klebsiella oxytoca]<>Terminase-like family [Klebsiella oxytoca]<>Term…
Loki_gp02	45.56	540	240	9	11	522	5	518	1e-155	463	gi|835852259|ref|WP_047684279.1|	terminase [Klebsiella michiganensis]
Loki_gp02	46.18	537	239	9	10	522	4	514	1e-155	462	gi|759787081|ref|WP_043494628.1|;gi|668969380|gb|KFC86029.1|	terminase [Hafnia alvei]<>phage terminase, large subunit [Hafnia alvei ATCC 13337]
Loki_gp02	46.24	532	232	9	11	514	5	510	1e-155	462	gi|835245754|ref|WP_047416709.1|;gi|725519345|gb|KHE11724.1|;gi|938649382|gb|KPR52549.1|	MULTISPECIES: terminase [Citrobacter freundii complex]<>terminase [Citrobacter braakii]<>terminase [Citrobacter freundii]
Loki_gp02	46.24	532	232	9	11	514	5	510	2e-155	462	gi|1103730200|ref|WP_071687789.1|;gi|1103193910|gb|OIZ39960.1|	terminase [Citrobacter freundii]<>terminase [Citrobacter freundii]
Loki_gp02	45.9	536	240	9	11	522	5	514	2e-155	462	gi|516289883|ref|WP_017693190.1|;gi|578296668|gb|EUM56366.1|;gi|578333108|gb|EUM92303.1|;gi|578351650|gb|EUN10645.1|;gi|662714938|gb|AIE64517.1|;gi|814555062|gb|KKF70231.1|;gi|821088677|gb|KKY41798.1|;gi|923242451|gb|KOP93411.1|;gi|923242946|gb|KOP93905.1|;gi|967106413|gb|KTH86624.1|;gi|967124656|gb|KTI04091.1|;gi|967200293|gb|KTI77151.1|;gi|967209940|gb|KTI86572.1|;gi|967293146|gb|KTJ67129.1|;gi…	MULTISPECIES: terminase [Gammaproteobacteria]<>hypothetical protein L361_01822 [Enterobacter sp. MGH 15]<>hypothetical protein L352_05872 [Enterobacter sp. MGH 6]<>hypothetical protein L347_05301 [Enterobacter sp. MGH 1]<>terminase [Enterobacter cloacae ECNIH2]<>terminase [Vibrio parahaemolyticus]<>terminase [Vibrio parahaemolyticus]<>terminase [Citrobacter amalonaticus]<>terminase [Citrobacter a…
Loki_gp02	45.49	532	236	9	11	514	5	510	2e-155	462	gi|571249706|emb|CDL34720.1|	Phage terminase, large subunit [Enterobacter cloacae ISC8]
Loki_gp02	46.24	532	232	9	11	514	5	510	3e-155	462	gi|695646484|ref|WP_032617989.1|;gi|668974362|gb|KFC89470.1|	terminase [Leclercia adecarboxylata]<>phage terminase, large subunit [Leclercia adecarboxylata ATCC 23216 = NBRC 102595]
Loki_gp02	45.9	536	240	9	11	522	5	514	3e-155	462	gi|779841950|ref|WP_045344886.1|;gi|770950053|gb|KJL50511.1|	terminase [Enterobacter hormaechei]<>terminase [Enterobacter hormaechei subsp. steigerwaltii]
Loki_gp02	46.05	532	233	9	11	514	5	510	3e-155	462	gi|749016575|ref|WP_040075314.1|;gi|685439017|gb|KGA99847.1|	terminase [Enterobacteriaceae bacterium ATCC 29904]<>terminase-like family protein [Enterobacteriaceae bacterium ATCC 29904]
Loki_gp02	46.24	532	232	9	11	514	5	510	3e-155	462	gi|782718621|ref|WP_045618042.1|;gi|770969556|gb|KJL64733.1|	terminase [Enterobacter hormaechei]<>terminase [Enterobacter hormaechei subsp. oharae]
Loki_gp03	100	500	0	0	1	500	1	500	0	1038	gi|949419294|emb|CUS06464.1|	putative portal vertex protein [unclassified Siphoviridae]
Loki_gp03	75.2	504	113	2	3	494	5	508	0	790	gi|589892179|ref|YP_009008544.1|;gi|583926733|gb|AHI60039.1|	putative portal protein [Acinetobacter phage IME_AB3]<>putative portal protein [Acinetobacter phage IME_AB3]
Loki_gp03	52.88	503	224	8	1	500	1	493	3e-168	493	gi|971751696|ref|YP_009205603.1|;gi|936761534|gb|ALH23593.1|	portal protein [Pseudomonas phage PaMx42]<>portal protein [Pseudomonas phage PaMx42]
Loki_gp03	54.26	470	205	7	2	468	3	465	1e-167	491	gi|399528722|ref|YP_006560759.1|;gi|371767558|gb|AEX56092.1|	portal protein [Burkholderia phage KL1]<>portal protein [Burkholderia phage KL1]
Loki_gp03	54.05	481	207	6	2	475	10	483	4e-166	488	gi|985760152|ref|YP_009225673.1|;gi|910307309|gb|AKU43025.1|	portal protein [Rhodobacter phage RcTitan]<>portal protein [Rhodobacter phage RcTitan]
Loki_gp03	53.85	481	208	6	2	475	10	483	2e-165	487	gi|910307492|gb|AKU43191.1|	portal protein [Rhodobacter phage RcSpartan]
Loki_gp03	53.08	503	222	9	1	497	1	495	4e-163	480	gi|971766232|ref|YP_009219165.1|;gi|823081381|gb|AKI28737.1|	portal protein [Stenotrophomonas phage vB_SmaS-DLP_2]<>portal protein [Stenotrophomonas phage vB_SmaS-DLP_2]
Loki_gp03	52.49	503	225	9	1	497	11	505	2e-161	476	gi|658311465|ref|YP_009044342.1|;gi|656178007|emb|CDN96768.1|	portal protein [Pseudomonas phage vB_PaeS_SCH_Ab26]<>portal protein [Pseudomonas phage vB_PaeS_SCH_Ab26]
Loki_gp03	53.14	478	214	7	1	475	1	471	9e-161	474	gi|388542667|ref|YP_006299872.1|;gi|378407735|gb|AFB83296.1|	portal protein [Pseudomonas phage vB_Pae-Kakheti25]<>portal protein [Pseudomonas phage vB_Pae-Kakheti25]
Loki_gp03	52.29	503	226	9	1	497	1	495	1e-160	474	gi|148912835|ref|YP_001293414.1|	hypothetical protein ORF007 [Pseudomonas phage 73]
Loki_gp03	53.14	478	214	7	1	475	1	471	1e-160	474	gi|701904471|gb|AIW01672.1|	hypothetical protein vB_Pae_PS9N_00021 [Pseudomonas phage vB_Pae_PS9N]
Loki_gp03	52.72	478	216	7	1	475	1	471	7e-159	469	gi|823081440|gb|AKI28795.1|	portal protein [Stenotrophomonas phage vB_SmaS-DLP_1]
Loki_gp03	48.54	480	230	3	1	480	1	463	5e-154	456	gi|1088494520|gb|OHD25442.1|	hypothetical protein A2Y38_12850 [Spirochaetes bacterium GWB1_59_5]
Loki_gp03	46	500	252	3	3	484	13	512	7e-147	440	gi|971821760|ref|YP_009220342.1|;gi|827196340|gb|AKJ71366.1|	portal protein [Achromobacter phage phiAxp-1]<>portal protein [Achromobacter phage phiAxp-1]
Loki_gp03	48.62	471	221	4	8	478	15	464	2e-144	432	gi|764162030|ref|YP_009126426.1|;gi|746947748|gb|AJD83160.1|	portal protein [Paracoccus phage vB_PmaS_IMEP1]<>portal protein [Paracoccus phage vB_PmaS_IMEP1]
Loki_gp03	42.56	484	246	6	1	474	32	493	2e-126	387	gi|146329917|ref|YP_001210225.1|;gi|145321093|gb|ABP63576.1|	BcepGomrgp05 [Burkholderia phage BcepGomr]<>BcepGomrgp05 [Burkholderia phage BcepGomr]
Loki_gp03	39.84	492	281	4	2	491	21	499	5e-123	378	gi|1015669850|gb|AMW36123.1|	portal protein [Xanthomonas phage XAJ2]
Loki_gp03	41.55	491	264	9	3	481	10	489	2e-118	366	gi|1070621467|ref|YP_009302940.1|;gi|695256191|gb|AIT13842.1|	portal protein [Salmonella phage BP63]<>portal protein [Salmonella phage BP63]
Loki_gp03	37.63	489	294	2	1	482	20	504	2e-112	351	gi|971747943|ref|YP_009201741.1|;gi|746947423|gb|AJD82840.1|	hypothetical protein JWAP_00007 [Achromobacter phage 83-24]<>hypothetical protein JWAP_00007 [Achromobacter phage 83-24]
Loki_gp03	38.14	472	289	2	14	482	1	472	2e-111	347	gi|971741684|ref|YP_009196194.1|;gi|746947357|gb|AJD82775.1|	hypothetical protein JWX_00009 [Achromobacter phage JWX]<>hypothetical protein JWX_00009 [Achromobacter phage JWX]
Loki_gp03	37.52	501	290	8	1	500	1	479	2e-105	332	gi|1024906930|ref|WP_063540558.1|;gi|1024419910|gb|KZX63190.1|	hypothetical protein [Pseudomonas stutzeri]<>hypothetical protein A3710_17230 [Pseudomonas stutzeri]
Loki_gp03	37.3	496	276	9	1	491	1	466	2e-98	314	gi|1033177482|ref|WP_064481599.1|;gi|1029175742|gb|ANF26026.1|	hypothetical protein [Pseudomonas stutzeri]<>hypothetical protein PS273GM_13170 [Pseudomonas stutzeri]
Loki_gp03	35.8	500	293	6	1	495	1	477	5e-97	310	gi|1124547200|ref|WP_074830557.1|;gi|1094888703|emb|SER50799.1|	hypothetical protein [Pseudomonas lutea]<>protein of unknown function [Pseudomonas lutea]
Loki_gp03	37.68	483	269	8	3	478	2	459	4e-96	307	gi|1035828714|ref|WP_064622221.1|;gi|1034457566|gb|OAV29000.1|	hypothetical protein [Moraxella catarrhalis]<>62kDa structural protein [Moraxella catarrhalis]
Loki_gp03	36.27	499	297	8	1	495	1	482	2e-95	306	gi|751651716|ref|WP_041118583.1|;gi|610527424|dbj|BAO62828.1|	hypothetical protein [Pseudomonas protegens]<>hypothetical protein PPC_3481 [Pseudomonas protegens Cab57]
Loki_gp03	37.58	487	264	10	3	478	2	459	3e-95	305	gi|1035869614|ref|WP_064654917.1|;gi|1034446815|gb|OAV18471.1|	hypothetical protein [Moraxella catarrhalis]<>62kDa structural protein [Moraxella catarrhalis]
Loki_gp03	37.47	483	270	8	3	478	2	459	4e-95	305	gi|823079971|gb|AKI27358.1|	portal protein [Moraxella phage Mcat8]
Loki_gp03	36.33	501	293	9	1	494	1	482	4e-95	305	gi|550112445|gb|ERO65297.1|	hypothetical protein P308_19980 [Pseudomonas sp. CMAA1215]
Loki_gp03	36.07	499	297	8	1	494	1	482	7e-95	305	gi|985600164|ref|WP_060839661.1|;gi|771843363|dbj|BAQ75150.1|	hypothetical protein [Pseudomonas sp. Os17]<>uncharacterized protein POS17_3456 [Pseudomonas sp. Os17]
Loki_gp03	37.07	464	264	6	1	459	1	441	8e-95	305	gi|1124547176|ref|WP_074830533.1|;gi|1094888717|emb|SER50129.1|	hypothetical protein [Pseudomonas lutea]<>protein of unknown function [Pseudomonas lutea]
Loki_gp03	36.27	499	297	8	1	495	1	482	9e-95	305	gi|499374470|ref|WP_011062048.1|;gi|68345424|gb|AAY93030.1|	hypothetical protein [Pseudomonas protegens]<>hypothetical protein PFL_3765 [Pseudomonas protegens Pf-5]
Loki_gp03	35.87	499	298	8	1	494	1	482	1e-94	304	gi|1119470556|ref|WP_072444368.1|;gi|1081660956|emb|SCZ74113.1|;gi|1087302350|emb|SDA81229.1|;gi|1095094939|emb|SEL78253.1|;gi|1099743189|emb|SFA66698.1|;gi|1099749501|emb|SFU07867.1|;gi|1104134719|emb|SFY02405.1|;gi|1104140892|emb|SFY30955.1|	MULTISPECIES: hypothetical protein [Pseudomonas]<>protein of unknown function [Pseudomonas sp. NFPP17]<>protein of unknown function [Pseudomonas sp. NFPP15]<>protein of unknown function [Pseudomonas sp. NFPP18]<>protein of unknown function [Pseudomonas sp. NFPP13]<>protein of unknown function [Pseudomonas sp. NFPP25]<>protein of unknown function [Pseudomonas sp. NFPP16]<>protein of unknown functi…
Loki_gp03	37.27	483	271	8	3	478	2	459	1e-94	303	gi|489757480|ref|WP_003661447.1|;gi|326564857|gb|EGE15063.1|	hypothetical protein [Moraxella catarrhalis]<>hypothetical protein E9K_04182 [Moraxella catarrhalis 103P14B1]
Loki_gp03	36.66	491	286	8	1	489	1	468	2e-94	304	gi|505449073|ref|WP_015636175.1|;gi|500243419|gb|AGL85577.1|	hypothetical protein [Pseudomonas protegens]<>hypothetical protein PFLCHA0_c38110 [Pseudomonas protegens CHA0]
Loki_gp03	37.05	502	285	9	1	495	1	478	2e-94	303	gi|749664517|ref|WP_040263686.1|	hypothetical protein [Pseudomonas sp. CB1]
Loki_gp03	37.06	483	272	8	3	478	2	459	5e-94	302	gi|823079794|gb|AKI27184.1|	portal protein [Moraxella phage Mcat5]
Loki_gp03	38.59	469	248	10	21	478	2	441	2e-93	300	gi|1035865444|ref|WP_064650929.1|;gi|1034433978|gb|OAV06002.1|	hypothetical protein [Moraxella catarrhalis]<>62kDa structural protein [Moraxella catarrhalis]
Loki_gp03	36.36	484	286	7	1	480	1	466	9e-93	299	gi|1089060533|emb|SEE13647.1|;gi|1089061384|emb|SEE39094.1|	protein of unknown function [Pseudomonas coleopterorum]<>protein of unknown function [Pseudomonas coleopterorum]
Loki_gp03	36.11	504	290	9	1	495	1	481	1e-89	291	gi|1134327478|ref|WP_076567265.1|;gi|1131758215|emb|SIR84067.1|	hypothetical protein [Pseudomonas sp. B10]<>protein of unknown function [Pseudomonas sp. B10]
Loki_gp03	36.16	484	281	9	1	477	1	463	2e-89	291	gi|1033049395|ref|WP_064361129.1|;gi|1013848542|gb|AMT88399.1|	hypothetical protein [Pseudomonas koreensis]<>hypothetical protein AYO71_12885 [Pseudomonas koreensis]
Loki_gp03	35.23	491	293	7	1	489	1	468	7e-89	289	gi|740847711|ref|WP_038632964.1|;gi|647805500|gb|AIC20584.1|	hypothetical protein [Pseudomonas chlororaphis]<>hypothetical protein EY04_17220 [Pseudomonas chlororaphis]
Loki_gp03	35.2	500	302	8	1	495	1	483	9e-89	289	gi|1124473415|ref|WP_074759041.1|;gi|1087472082|emb|SDJ38697.1|	hypothetical protein [Pseudomonas abietaniphila]<>protein of unknown function [Pseudomonas abietaniphila]
Loki_gp03	35.95	484	282	9	1	477	1	463	1e-88	288	gi|939353603|ref|WP_054898931.1|	hypothetical protein [Pseudomonas sp. NBRC 111137]
Loki_gp03	35.48	496	285	8	1	489	1	468	2e-88	288	gi|1067237065|ref|WP_069557353.1|;gi|1065881847|gb|OEC54819.1|	hypothetical protein [Pseudomonas sp. AP42]<>hypothetical protein A7K61_28425 [Pseudomonas sp. AP42]
Loki_gp03	35.58	489	284	8	1	480	1	467	3e-88	288	gi|545129712|ref|WP_021491144.1|;gi|542014927|gb|ERH60762.1|	hypothetical protein [Pseudomonas fluorescens]<>hypothetical protein O204_17040 [Pseudomonas fluorescens EGD-AQ6]
Loki_gp03	35	480	293	6	1	478	1	463	6e-88	287	gi|914710697|ref|WP_050681174.1|;gi|910872889|gb|KNH48354.1|	hypothetical protein [Pseudomonas lini]<>hypothetical protein ACS73_00335 [Pseudomonas lini]
Loki_gp03	35.64	491	291	7	1	489	1	468	8e-88	286	gi|829063955|ref|WP_047297549.1|	hypothetical protein [Pseudomonas fluorescens]
Loki_gp03	35.03	491	294	7	1	489	1	468	1e-87	286	gi|740793094|ref|WP_038578378.1|;gi|692338721|gb|AIS12638.1|	hypothetical protein [Pseudomonas chlororaphis]<>hypothetical protein JM49_13425 [Pseudomonas chlororaphis subsp. aurantiaca]
Loki_gp03	34.56	489	301	6	1	487	1	472	2e-87	286	gi|802175068|ref|WP_046048558.1|;gi|799193978|gb|KJZ38953.1|	hypothetical protein [Pseudomonas fluorescens]<>hypothetical protein VC34_22825 [Pseudomonas fluorescens]
Loki_gp03	35.48	496	285	8	1	489	1	468	2e-87	286	gi|966372479|ref|WP_058419797.1|;gi|962052248|gb|KTB67013.1|	hypothetical protein [Pseudomonas fluorescens]<>hypothetical protein AO063_21170 [Pseudomonas fluorescens ICMP 11288]
Loki_gp03	35.69	496	284	8	1	489	1	468	2e-87	285	gi|966362541|ref|WP_058410411.1|;gi|962129187|gb|KTC28853.1|;gi|1085801250|emb|SDS34847.1|	hypothetical protein [Pseudomonas sp. ICMP 19500]<>hypothetical protein AO239_27810 [Pseudomonas sp. ICMP 19500]<>protein of unknown function [Pseudomonas sp. bs2935]
Loki_gp03	35.76	509	285	10	1	495	1	481	2e-87	285	gi|817116859|ref|WP_046489964.1|	hypothetical protein [Pseudomonas veronii]
Loki_gp03	37.01	489	271	9	3	482	2	462	5e-87	284	gi|1055144619|ref|WP_066891843.1|;gi|1041962457|gb|OBX51776.1|	hypothetical protein [Moraxella nonliquefaciens]<>hypothetical protein A9Z60_05660 [Moraxella nonliquefaciens]
Loki_gp03	36.61	489	273	9	3	482	2	462	2e-86	282	gi|1055141377|ref|WP_066888647.1|;gi|1041958081|gb|OBX47578.1|	hypothetical protein [Moraxella nonliquefaciens]<>hypothetical protein A9Z65_04390 [Moraxella nonliquefaciens]
Loki_gp03	34.83	491	295	8	1	489	1	468	3e-86	282	gi|1099713383|emb|SFS27638.1|	protein of unknown function [Pseudomonas sp. NFACC42-2]
Loki_gp03	34.92	484	287	8	1	477	1	463	5e-86	282	gi|829067928|ref|WP_047301241.1|	hypothetical protein [Pseudomonas fluorescens]
Loki_gp03	35.03	491	294	8	1	489	1	468	6e-86	282	gi|814583487|ref|WP_046382699.1|	hypothetical protein [Pseudomonas veronii]
Loki_gp03	35.08	496	287	8	1	489	1	468	7e-86	281	gi|498253749|ref|WP_010567905.1|;gi|610827164|gb|EZI23921.1|;gi|1085632269|emb|SDE61790.1|	hypothetical protein [Pseudomonas extremaustralis]<>hypothetical protein PE143B_0129530 [Pseudomonas extremaustralis 14-3 substr. 14-3b]<>protein of unknown function [Pseudomonas extremaustralis]
Loki_gp03	35.4	500	299	8	1	495	1	481	1e-85	281	gi|802174002|ref|WP_046047658.1|;gi|799196638|gb|KJZ41583.1|	hypothetical protein [Pseudomonas fluorescens]<>hypothetical protein VC34_17480 [Pseudomonas fluorescens]
Loki_gp03	34.62	491	296	8	1	489	1	468	1e-85	281	gi|951325864|ref|WP_057712046.1|;gi|949209083|gb|KRP70158.1|	hypothetical protein [Pseudomonas sp. DSM 29167]<>hypothetical protein TX24_29750 [Pseudomonas sp. DSM 29167]
Loki_gp03	38.12	467	252	9	25	482	4	442	2e-85	280	gi|1055342118|ref|WP_067006722.1|;gi|1041999472|gb|OBX87865.1|	hypothetical protein [Moraxella nonliquefaciens]<>hypothetical protein A7456_07420 [Moraxella nonliquefaciens]
Loki_gp03	36.7	485	270	9	3	478	2	458	3e-85	280	gi|1035866921|ref|WP_064652375.1|	hypothetical protein [Moraxella catarrhalis]
Loki_gp03	34.62	491	296	8	1	489	1	468	5e-85	279	gi|983371686|ref|WP_060550172.1|;gi|949182728|gb|KRP44070.1|;gi|1085718037|emb|SDN50609.1|	hypothetical protein [Pseudomonas poae]<>hypothetical protein TU75_22595 [Pseudomonas poae]<>protein of unknown function [Pseudomonas poae]
Loki_gp03	34.41	494	289	8	1	487	1	466	3e-84	277	gi|980999027|ref|WP_059404332.1|;gi|929902278|gb|KPG98349.1|	hypothetical protein [Pseudomonas sp. RIT-PI-q]<>hypothetical protein AEQ67_13425 [Pseudomonas sp. RIT-PI-q]
Loki_gp03	34.42	491	297	8	1	489	1	468	4e-84	277	gi|516346470|ref|WP_017736503.1|	hypothetical protein [Pseudomonas sp. CBZ-4]
Loki_gp03	34.56	489	295	8	3	489	4	469	2e-83	275	gi|489267247|ref|WP_003175035.1|;gi|311283807|gb|EFQ62391.1|	hypothetical protein [Pseudomonas fluorescens]<>hypothetical protein PFWH6_3917 [Pseudomonas fluorescens WH6]
Loki_gp03	34.62	491	296	8	1	489	1	468	3e-83	275	gi|520814013|ref|WP_020300117.1|;gi|515455552|gb|EPL03890.1|	hypothetical protein [Pseudomonas sp. CF161]<>hypothetical protein CF161_28765 [Pseudomonas sp. CF161]
Loki_gp03	34.58	480	295	7	1	478	1	463	7e-83	274	gi|696526523|ref|WP_033061765.1|;gi|633675719|gb|KDD65319.1|	hypothetical protein [Pseudomonas mandelii]<>hypothetical protein V466_29065 [Pseudomonas mandelii PD30]
Loki_gp03	34.17	480	297	6	1	478	1	463	2e-82	273	gi|495351042|ref|WP_008075767.1|;gi|398231257|gb|EJN17248.1|	hypothetical protein [Pseudomonas sp. GM79]<>hypothetical protein PMI36_05582 [Pseudomonas sp. GM79]
Loki_gp03	35.93	487	279	8	3	482	2	462	3e-82	271	gi|817909239|gb|AKG07115.1|;gi|817911540|gb|AKG09035.1|;gi|817913791|gb|AKG10874.1|	hypothetical protein AAX06_01800 [Moraxella bovoculi]<>hypothetical protein AAX05_01305 [Moraxella bovoculi]<>hypothetical protein AAX07_01355 [Moraxella bovoculi]
Loki_gp03	33.73	498	310	7	1	496	1	480	4e-82	272	gi|1026752902|gb|OAE15530.1|	hypothetical protein A2T76_17860 [Pseudomonas brenneri]
Loki_gp03	30.89	492	318	4	1	484	1	478	9e-82	271	gi|514968285|ref|WP_016656582.1|;gi|514092042|gb|EPF72126.1|	hypothetical protein [Acinetobacter rudis]<>hypothetical protein F945_02176 [Acinetobacter rudis CIP 110305]
Loki_gp03	31.24	493	315	6	1	484	1	478	2e-80	267	gi|490997525|ref|WP_004859251.1|;gi|479991690|gb|ENV34543.1|	hypothetical protein [Acinetobacter gerneri]<>hypothetical protein F960_01281 [Acinetobacter gerneri DSM 14967 = CIP 107464]
Loki_gp03	32.72	486	308	4	1	479	1	474	4e-80	266	gi|447209102|ref|WP_001286358.1|;gi|571581040|gb|ETP74538.1|;gi|571584462|gb|ETP77818.1|;gi|571609166|gb|ETQ01569.1|;gi|571683921|gb|ETQ73753.1|;gi|571684356|gb|ETQ74179.1|;gi|571729785|gb|ETR18097.1|;gi|571771701|gb|ETR58685.1|;gi|741322246|gb|KHV42436.1|;gi|741372459|gb|KHV90344.1|;gi|741382529|gb|KHW00096.1|;gi|741392464|gb|KHW09773.1|;gi|741393996|gb|KHW11221.1|;gi|741396292|gb|KHW13413.1|;gi…	hypothetical protein [Acinetobacter baumannii]<>hypothetical protein P640_0226 [Acinetobacter baumannii UH0707]<>hypothetical protein P641_1082 [Acinetobacter baumannii UH0807]<>PF13264 domain protein [Acinetobacter baumannii UH10707]<>hypothetical protein P665_1048 [Acinetobacter baumannii UH2907]<>hypothetical protein P664_0672 [Acinetobacter baumannii UH2707]<>hypothetical protein P677_1642 [A…
Loki_gp03	33.4	485	305	4	1	479	1	473	7e-80	266	gi|898307968|ref|WP_049582421.1|;gi|884695147|gb|KMV09451.1|	DUF4055 domain-containing protein [Acinetobacter baumannii]<>hypothetical protein AB988_4281 [Acinetobacter baumannii]
Loki_gp03	34.67	473	253	10	21	482	1	428	9e-80	264	gi|1067241359|gb|OED34522.1|	hypothetical protein AB832_07440 [Flavobacteriaceae bacterium (ex Bugula neritina AB1)]
Loki_gp03	33.4	485	305	4	1	479	1	473	1e-79	265	gi|447209089|ref|WP_001286345.1|;gi|322508819|gb|ADX04273.1|;gi|1066968770|gb|AOP64164.1|	hypothetical protein [Acinetobacter baumannii]<>Putative uncharacterized protein [Acinetobacter baumannii 1656-2]<>hypothetical protein DU202_03009 [Acinetobacter baumannii DU202]
Loki_gp03	37.33	450	245	9	38	478	7	428	3e-79	263	gi|1034434995|gb|OAV06994.1|	62kDa structural protein [Moraxella catarrhalis]
Loki_gp03	33.2	485	306	4	1	479	1	473	3e-79	264	gi|447209088|ref|WP_001286344.1|;gi|469494858|gb|AGH35036.1|;gi|902758903|emb|CRX65379.1|	DNA-binding protein [Acinetobacter baumannii]<>hypothetical protein ABD1_11480 [Acinetobacter baumannii D1279779]<>hypothetical protein ABR2090_2463 [Acinetobacter baumannii]
Loki_gp03	32.58	485	309	3	1	479	1	473	8e-78	260	gi|691019264|ref|WP_031979689.1|;gi|589417157|gb|EXH01402.1|	hypothetical protein [Acinetobacter baumannii]<>hypothetical protein J630_3890 [Acinetobacter baumannii 1178044]
Loki_gp03	32.78	485	308	4	1	479	1	473	1e-77	260	gi|691039140|ref|WP_031991223.1|;gi|598566630|gb|EYD15845.1|	hypothetical protein [Acinetobacter baumannii]<>hypothetical protein J946_4061 [Acinetobacter baumannii 25878_3]
Loki_gp03	32.37	485	310	4	1	479	1	473	3e-77	259	gi|691096509|ref|WP_032024058.1|;gi|588162714|gb|EXE37086.1|;gi|595104996|gb|EXV31560.1|	hypothetical protein [Acinetobacter baumannii]<>hypothetical protein J571_3828 [Acinetobacter baumannii 554515]<>hypothetical protein J844_3789 [Acinetobacter baumannii 24975_1]
Loki_gp03	32.16	485	311	4	1	479	1	473	7e-77	258	gi|1039545754|ref|WP_064875786.1|;gi|1037865246|gb|OBE49076.1|	hypothetical protein [Acinetobacter baumannii]<>hypothetical protein A7930_18400 [Acinetobacter baumannii]
Loki_gp03	32.37	485	310	4	1	479	1	473	1e-76	257	gi|447209108|ref|WP_001286364.1|;gi|400382895|gb|EJP41573.1|;gi|444780694|gb|ELX04627.1|;gi|1078626266|gb|OFD20010.1|	hypothetical protein [Acinetobacter baumannii]<>PF13264 domain protein [Acinetobacter baumannii OIFC032]<>PF13264 domain protein [Acinetobacter baumannii Naval-57]<>hypothetical protein A1D04_04705 [Acinetobacter baumannii]
Loki_gp03	32.16	485	311	4	1	479	1	473	2e-76	257	gi|638911173|ref|WP_024436416.1|;gi|593663585|gb|EXS43014.1|;gi|595121019|gb|EXV46879.1|;gi|595164366|gb|EXV88648.1|;gi|598577196|gb|EYD25768.1|;gi|601368777|gb|EYS18801.1|;gi|630415833|gb|KCX33402.1|;gi|630494167|gb|KCY03868.1|;gi|630586503|gb|KCY89115.1|;gi|630592746|gb|KCY94894.1|	hypothetical protein [Acinetobacter baumannii]<>hypothetical protein J691_4129 [Acinetobacter baumannii 981176]<>hypothetical protein J840_4025 [Acinetobacter baumannii 25935_7]<>hypothetical protein J823_4163 [Acinetobacter baumannii 25766_10]<>hypothetical protein J944_3949 [Acinetobacter baumannii 25878_1]<>hypothetical protein J972_4160 [Acinetobacter baumannii 26016_6]<>hypothetical protein …
Loki_gp03	33.54	486	304	4	1	479	1	474	2e-76	257	gi|740517720|ref|WP_038346490.1|;gi|942940180|gb|KQF01733.1|;gi|1002191515|gb|AMN01877.1|	hypothetical protein [Acinetobacter baumannii]<>hypothetical protein APB97_13840 [Acinetobacter baumannii]<>hypothetical protein AZE33_11915 [Acinetobacter baumannii]
Loki_gp03	33.2	485	306	3	1	479	1	473	2e-76	257	gi|690979408|ref|WP_031953272.1|;gi|593921911|gb|EXT77011.1|	hypothetical protein [Acinetobacter baumannii]<>hypothetical protein J767_3912 [Acinetobacter baumannii 25307_4]
Loki_gp03	32.16	485	311	4	1	479	1	473	3e-76	256	gi|691107574|ref|WP_032030438.1|;gi|610998609|gb|EZJ03938.1|	hypothetical protein [Acinetobacter baumannii]<>hypothetical protein J853_3211 [Acinetobacter baumannii 24975_10]
Loki_gp03	33.33	486	305	4	1	479	1	474	3e-76	256	gi|638928091|ref|WP_024438602.1|	hypothetical protein [Acinetobacter baumannii]
Loki_gp03	32.16	485	311	4	1	479	1	473	5e-76	256	gi|691089008|ref|WP_032020970.1|;gi|589389154|gb|EXG73990.1|;gi|593851653|gb|EXT09113.1|	hypothetical protein [Acinetobacter baumannii]<>hypothetical protein J652_3752 [Acinetobacter baumannii 1296252]<>hypothetical protein J788_4005 [Acinetobacter baumannii 44895_5]
Loki_gp03	32.92	486	307	4	1	479	1	474	5e-76	256	gi|951253554|ref|WP_057694411.1|;gi|948343917|gb|KRI44275.1|	hypothetical protein [Acinetobacter baumannii]<>hypothetical protein APC31_03090 [Acinetobacter baumannii]
Loki_gp03	33.13	486	306	4	1	479	1	474	5e-76	256	gi|924628950|ref|WP_053531361.1|;gi|923940217|gb|KOR72925.1|	hypothetical protein [Acinetobacter baumannii]<>hypothetical protein RW58_20590 [Acinetobacter baumannii]
Loki_gp03	32.16	485	311	4	1	479	1	473	6e-76	256	gi|447209109|ref|WP_001286365.1|;gi|342231687|gb|EGT96489.1|;gi|342233889|gb|EGT98590.1|;gi|444770736|gb|ELW94881.1|;gi|475912958|gb|EMT82984.1|;gi|475920388|gb|EMT89779.1|;gi|475959523|gb|EMU25740.1|;gi|571722868|gb|ETR11460.1|;gi|587782644|gb|EXA75856.1|;gi|587806375|gb|EXA98495.1|;gi|587822593|gb|EXB13679.1|;gi|587869848|gb|EXB59149.1|;gi|587905595|gb|EXB93741.1|;gi|587960107|gb|EXC45463.1|;gi…	hypothetical protein [Acinetobacter baumannii]<>hypothetical protein ABNIH1_01586 [Acinetobacter baumannii ABNIH1]<>hypothetical protein ABNIH4_19878 [Acinetobacter baumannii ABNIH4]<>PF13264 domain protein [Acinetobacter baumannii Naval-78]<>hypothetical protein ABNIH5_19449 [Acinetobacter baumannii ABNIH5]<>hypothetical protein ABNIH25_02355 [Acinetobacter baumannii ABNIH25]<>hypothetical prote…
Loki_gp03	32.16	485	311	4	1	479	1	473	6e-76	256	gi|691105117|ref|WP_032029244.1|;gi|587930876|gb|EXC17981.1|	hypothetical protein [Acinetobacter baumannii]<>hypothetical protein J549_3859 [Acinetobacter baumannii 724909]
Loki_gp03	32.23	484	310	4	1	478	1	472	6e-76	255	gi|1040803632|ref|WP_065125865.1|;gi|1038948777|gb|OBO78526.1|	hypothetical protein, partial [Acinetobacter baumannii]<>hypothetical protein A9949_14990, partial [Acinetobacter baumannii]
Loki_gp03	32.16	485	311	4	1	479	1	473	7e-76	255	gi|638882760|ref|WP_024434538.1|	hypothetical protein [Acinetobacter baumannii]
Loki_gp03	32.16	485	311	4	1	479	1	473	7e-76	255	gi|691101992|ref|WP_032027484.1|;gi|611007595|gb|EZJ12577.1|	hypothetical protein [Acinetobacter baumannii]<>hypothetical protein J734_3423 [Acinetobacter baumannii 24860_1]
Loki_gp03	32.72	486	308	4	1	479	1	474	7e-76	255	gi|757529684|ref|WP_042791396.1|;gi|675328485|gb|AIL78005.1|;gi|675329114|gb|AIL78634.1|;gi|1038672664|gb|OBM13120.1|	hypothetical protein [Acinetobacter baumannii]<>hypothetical protein IX87_04935 [Acinetobacter baumannii]<>hypothetical protein IX87_08330 [Acinetobacter baumannii]<>hypothetical protein A9933_17010 [Acinetobacter baumannii]
Loki_gp03	32.92	486	307	4	1	479	1	474	1e-75	255	gi|447209112|ref|WP_001286368.1|;gi|587783492|gb|EXA76640.1|;gi|587783559|gb|EXA76704.1|;gi|587783692|gb|EXA76831.1|;gi|587966859|gb|EXC51932.1|;gi|587967437|gb|EXC52485.1|;gi|587967979|gb|EXC53011.1|;gi|587969750|gb|EXC54703.1|;gi|587975627|gb|EXC60371.1|;gi|588022578|gb|EXD05613.1|;gi|588034599|gb|EXD17041.1|;gi|588063522|gb|EXD44796.1|;gi|588115533|gb|EXD93815.1|;gi|588115651|gb|EXD93929.1|;gi…	hypothetical protein [Acinetobacter baumannii]<>hypothetical protein J523_3216 [Acinetobacter baumannii 1202252]<>hypothetical protein J523_3184 [Acinetobacter baumannii 1202252]<>hypothetical protein J523_3135 [Acinetobacter baumannii 1202252]<>hypothetical protein J470_3395 [Acinetobacter baumannii 1032241]<>hypothetical protein J470_3259 [Acinetobacter baumannii 1032241]<>hypothetical protein …
Loki_gp03	32.92	486	307	4	1	479	1	474	1e-75	255	gi|638870397|ref|WP_024433978.1|	hypothetical protein [Acinetobacter baumannii]
Loki_gp04	100	316	0	0	1	316	1	316	0	654	gi|949419295|emb|CUS06465.1|	putative head morphogenesis protein, SPP1 gp7 family [unclassified Siphoviridae]
Loki_gp04	60	305	122	0	12	316	1	305	1e-132	387	gi|589892178|ref|YP_009008543.1|;gi|583926732|gb|AHI60038.1|	putative head protein [Acinetobacter phage IME_AB3]<>putative head protein [Acinetobacter phage IME_AB3]
Loki_gp04	31.3	361	196	7	2	315	8	363	4e-50	179	gi|399528723|ref|YP_006560760.1|;gi|371767559|gb|AEX56093.1|	head morphogenesis protein [Burkholderia phage KL1]<>head morphogenesis protein [Burkholderia phage KL1]
Loki_gp04	30.62	320	195	5	1	296	7	323	1e-49	178	gi|1088494521|gb|OHD25443.1|	hypothetical protein A2Y38_12860 [Spirochaetes bacterium GWB1_59_5]
Loki_gp04	31.83	355	201	5	2	315	8	362	4e-47	171	gi|971751695|ref|YP_009205604.1|;gi|936761533|gb|ALH23592.1|	morphogenesis protein [Pseudomonas phage PaMx42]<>morphogenesis protein [Pseudomonas phage PaMx42]
Loki_gp04	31.49	308	193	3	2	298	8	308	1e-45	167	gi|1015669851|gb|AMW36124.1|	head morphogenesis protein [Xanthomonas phage XAJ2]
Loki_gp04	33.75	323	192	4	2	302	8	330	2e-43	161	gi|388542668|ref|YP_006299873.1|;gi|378407736|gb|AFB83297.1|	F-like head morphogenesis protein [Pseudomonas phage vB_Pae-Kakheti25]<>F-like head morphogenesis protein [Pseudomonas phage vB_Pae-Kakheti25]
Loki_gp04	33.97	312	189	3	2	296	8	319	3e-43	161	gi|971766235|ref|YP_009219166.1|;gi|823081384|gb|AKI28740.1|	F-like head morphogenesis protein [Stenotrophomonas phage vB_SmaS-DLP_2]<>F-like head morphogenesis protein [Stenotrophomonas phage vB_SmaS-DLP_2]
Loki_gp04	33.97	312	189	3	2	296	8	319	4e-43	160	gi|701904472|gb|AIW01673.1|	hypothetical protein vB_Pae_PS9N_00022 [Pseudomonas phage vB_Pae_PS9N]
Loki_gp04	33.97	312	189	3	2	296	8	319	4e-43	160	gi|658311466|ref|YP_009044343.1|;gi|656178008|emb|CDN96769.1|	F-like head morphogenesis protein [Pseudomonas phage vB_PaeS_SCH_Ab26]<>F-like head morphogenesis protein [Pseudomonas phage vB_PaeS_SCH_Ab26]
Loki_gp04	33.97	312	189	3	2	296	8	319	4e-43	160	gi|148912836|ref|YP_001293415.1|;gi|823081443|gb|AKI28798.1|	hypothetical protein ORF008 [Pseudomonas phage 73]<>F-like head morphogenesis protein [Stenotrophomonas phage vB_SmaS-DLP_1]
Loki_gp04	30.75	348	200	8	2	315	8	348	2e-38	148	gi|985760153|ref|YP_009225674.1|;gi|910307310|gb|AKU43026.1|;gi|910307493|gb|AKU43192.1|	head morphogenesis [Rhodobacter phage RcTitan]<>head morphogenesis [Rhodobacter phage RcTitan]<>minor capsid protein [Rhodobacter phage RcSpartan]
Loki_gp04	26.64	304	200	5	3	293	5	298	4e-26	115	gi|764162031|ref|YP_009126427.1|;gi|746947749|gb|AJD83161.1|	head morphogenesis protein [Paracoccus phage vB_PmaS_IMEP1]<>head morphogenesis protein [Paracoccus phage vB_PmaS_IMEP1]
Loki_gp04	26.44	348	209	9	2	315	7	341	8e-26	114	gi|971821761|ref|YP_009220343.1|;gi|827196341|gb|AKJ71367.1|	putative head morphogenesis protein [Achromobacter phage phiAxp-1]<>putative head morphogenesis protein [Achromobacter phage phiAxp-1]
Loki_gp04	23.59	284	169	9	8	274	6	258	1e-10	72.4	gi|764123518|ref|WP_044309877.1|;gi|982610088|gb|KWS33202.1|	head morphogenesis protein [Pseudomonas syringae]<>phage head morphogenesis protein [Pseudomonas syringae pv. papulans]
Loki_gp04	23.59	284	169	9	8	274	18	270	1e-10	72.4	gi|940222516|gb|KPY33158.1|	Uncharacterized protein ALO65_03194 [Pseudomonas syringae pv. papulans]
Loki_gp04	23.67	283	168	9	9	274	7	258	2e-10	71.2	gi|950559345|ref|WP_057429439.1|	phage head morphogenesis protein [Pseudomonas syringae group genomosp. 3]
Loki_gp04	23.67	283	168	9	9	274	19	270	3e-10	71.2	gi|940011684|gb|KPW37445.1|	hypothetical protein ALO87_101914 [Pseudomonas syringae pv. apii]
Loki_gp04	24.57	289	172	8	2	274	12	270	2e-09	68.9	gi|771560399|ref|WP_045194454.1|;gi|770101952|gb|KJK19062.1|	head morphogenesis protein [Pseudomonas sp. 2(2015)]<>head morphogenesis protein [Pseudomonas sp. 2(2015)]
Loki_gp04	35.58	104	57	3	200	296	181	281	2e-09	68.2	gi|497086543|ref|WP_009465007.1|;gi|303293922|gb|EFL88298.1|	phage head morphogenesis protein, SPP1 gp7 [Ahrensia sp. R2A130]<>phage putative head morphogenesis protein, SPP1 gp7 [Ahrensia sp. R2A130]
Loki_gp04	23.73	354	194	12	2	309	6	329	2e-09	68.2	gi|1069300878|ref|WP_069672479.1|	phage head morphogenesis protein [Pseudomonas simiae]
Loki_gp04	24.01	354	193	13	2	309	6	329	3e-09	68.2	gi|754524763|ref|WP_041931225.1|	head morphogenesis protein [Pseudomonas brassicacearum]
Loki_gp04	31.53	111	44	2	232	310	220	330	5e-09	67	gi|1039343253|ref|WP_064774656.1|;gi|913252364|gb|KNY20438.1|	hypothetical protein [Methylobacterium sp. ARG-1]<>hypothetical protein AKJ13_22320 [Methylobacterium sp. ARG-1]
Loki_gp04	21.66	314	211	9	3	296	6	304	9e-09	66.6	gi|1069569883|gb|OEH66771.1|	hypothetical protein BAX61_13275 [Psychrobacter sp. B29-1]
Loki_gp04	24.01	354	193	13	2	309	6	329	1e-08	66.2	gi|763457957|ref|WP_044287488.1|	head morphogenesis protein [Pseudomonas fluorescens]
Loki_gp04	23.73	354	194	12	2	309	12	335	1e-08	66.2	gi|856794404|gb|KMN12238.1|	head morphogenesis protein [Pseudomonas weihenstephanensis]
Loki_gp04	24.91	289	171	9	2	274	6	264	1e-08	65.9	gi|1033145324|ref|WP_064451120.1|	phage head morphogenesis protein [Pseudomonas antarctica]
Loki_gp04	35.63	87	45	2	232	307	217	303	2e-08	65.1	gi|1094522446|emb|SEU03094.1|	phage putative head morphogenesis protein, SPP1 gp7 family [Paracoccus homiensis]
Loki_gp04	23.19	332	187	14	3	298	7	306	2e-08	65.1	gi|1086802171|emb|SDQ80395.1|	phage putative head morphogenesis protein, SPP1 gp7 family [Pseudomonas lundensis]
Loki_gp04	23.16	354	196	11	2	309	6	329	2e-08	65.5	gi|759485305|ref|WP_043206234.1|	head morphogenesis protein [Pseudomonas fluorescens]
Loki_gp04	29.01	162	83	5	163	295	191	349	2e-08	65.9	gi|775459821|dbj|BAQ93499.1|	phage head morphogenesis protein [uncultured Mediterranean phage uvMED]
Loki_gp04	23.73	354	194	13	2	309	6	329	3e-08	65.1	gi|1051482952|ref|WP_065905504.1|;gi|1050819516|gb|OCW24869.1|	phage head morphogenesis protein [Pseudomonas sp. S1E40]<>phage head morphogenesis protein [Pseudomonas sp. S1E40]
Loki_gp04	27.39	241	121	8	115	309	81	313	3e-08	65.1	gi|327378838|gb|AEA70188.1|	Putative phage protein [Pseudomonas brassicacearum subsp. brassicacearum NFM421]
Loki_gp04	29.45	146	61	4	200	307	187	328	3e-08	65.1	gi|736858850|ref|WP_034858688.1|	phage head morphogenesis protein [Ensifer sojae]
Loki_gp04	27.8	241	120	8	115	309	81	313	3e-08	64.7	gi|496338865|ref|WP_009048043.1|;gi|388551335|gb|EIM14604.1|	head morphogenesis protein [Pseudomonas chlororaphis]<>phage head morphogenesis protein, SPP1 gp7 family [Pseudomonas chlororaphis O6]
Loki_gp04	27.8	241	120	8	115	309	81	313	3e-08	64.7	gi|948126987|ref|WP_056785400.1|;gi|945310304|gb|KQT67882.1|	phage head morphogenesis protein [Pseudomonas sp. Leaf434]<>phage head morphogenesis protein [Pseudomonas sp. Leaf434]
Loki_gp04	27.27	242	122	8	114	309	80	313	4e-08	64.7	gi|1099554994|emb|SFA83233.1|	phage putative head morphogenesis protein, SPP1 gp7 family [Pseudomonas simiae]
Loki_gp04	23.45	354	195	12	2	309	6	329	5e-08	64.3	gi|949592865|ref|WP_057024425.1|;gi|949190263|gb|KRP51553.1|	phage head morphogenesis protein [Pseudomonas synxantha]<>head morphogenesis protein [Pseudomonas synxantha]
Loki_gp04	30	150	97	3	131	272	101	250	5e-08	64.3	gi|525972008|ref|YP_008239631.1|;gi|451937941|gb|AGF88235.1|	head morphogenesis protein [Salmonella phage FSL SP-031]<>head morphogenesis protein [Salmonella phage FSL SP-031]
Loki_gp04	24.34	341	192	15	5	307	9	321	5e-08	64.3	gi|671541018|ref|WP_031524669.1|	head morphogenesis protein [Siccibacter colletis]
Loki_gp04	27.39	241	121	8	115	309	81	313	6e-08	63.9	gi|1089320365|emb|SDY30793.1|	phage putative head morphogenesis protein, SPP1 gp7 family [Pseudomonas sp. NFIX28]
Loki_gp04	30	150	97	3	131	272	101	250	6e-08	63.9	gi|451938728|gb|AGF88981.1|;gi|451939477|gb|AGF89627.1|	head morphogenesis protein [Salmonella phage FSL SP-049]<>head morphogenesis protein [Salmonella phage FSL SP-038]
Loki_gp04	27.27	242	122	8	114	309	80	313	6e-08	63.9	gi|1119459955|ref|WP_072433981.1|;gi|1104095985|emb|SFX26217.1|	phage head morphogenesis protein [Pseudomonas sp. NFR02]<>phage putative head morphogenesis protein, SPP1 gp7 family [Pseudomonas sp. NFR02]
Loki_gp04	27.27	242	122	8	114	309	80	313	6e-08	63.9	gi|860276742|ref|WP_048365757.1|	head morphogenesis protein [Pseudomonas weihenstephanensis]
Loki_gp04	27.27	242	122	8	114	309	80	313	7e-08	63.9	gi|655189975|ref|WP_028616726.1|	head morphogenesis protein [Pseudomonas canadensis]
Loki_gp04	32.32	99	43	2	217	291	241	339	7e-08	63.9	gi|775458608|dbj|BAQ92406.1|	phage putative head morphogenesis protein [uncultured Mediterranean phage uvMED]
Loki_gp04	37.07	116	54	4	183	279	219	334	7e-08	63.5	gi|472341833|ref|YP_007675347.1|;gi|461222055|gb|AGH16129.1|	hypothetical protein CPWG_00018 [Cyanophage MED4-117]<>hypothetical protein CPWG_00018 [Cyanophage MED4-117]
Loki_gp04	27.27	242	122	8	114	309	80	313	8e-08	63.5	gi|829043407|ref|WP_047280208.1|	head morphogenesis protein [Pseudomonas fluorescens]
Loki_gp04	34.48	87	35	1	228	292	214	300	8e-08	63.5	gi|749548722|ref|WP_040182268.1|;gi|749096582|gb|KII11758.1|	phage head morphogenesis protein [Phaeobacter sp. S60]<>hypothetical protein OO25_19625 [Phaeobacter sp. S60]
Loki_gp04	31.68	101	52	3	228	311	261	361	9e-08	63.5	gi|787058938|dbj|BAR30721.1|	phage head morphogenesis protein [uncultured Mediterranean phage uvMED]
Loki_gp04	31.68	101	52	3	228	311	262	362	9e-08	63.5	gi|787058821|dbj|BAR30613.1|	phage head morphogenesis protein [uncultured Mediterranean phage uvMED]
Loki_gp04	34.48	87	35	1	228	292	214	300	1e-07	63.2	gi|499857414|ref|WP_011538148.1|;gi|99036924|gb|ABF63536.1|	phage head morphogenesis protein, SPP1 gp7 [Ruegeria sp. TM1040]<>phage-related conserved hypothetical protein [Ruegeria sp. TM1040]
Loki_gp04	27.27	242	122	8	114	309	80	313	1e-07	63.2	gi|489310935|ref|WP_003218347.1|;gi|562783793|gb|ESW57818.1|	head morphogenesis protein [Pseudomonas fluorescens]<>phage putative head morphogenesis protein, SPP1 gp7 family [Pseudomonas fluorescens BBc6R8]
Loki_gp04	37.07	116	54	4	183	279	219	334	1e-07	63.9	gi|472340551|ref|YP_007674075.1|;gi|465284489|gb|AGH27007.1|	hypothetical protein CPAG_00039 [Prochlorococcus phage MED4-184]<>hypothetical protein CPAG_00039 [Prochlorococcus phage MED4-184]
Loki_gp04	41.27	63	35	1	232	292	83	145	1e-07	61.2	gi|653010788|ref|WP_027262948.1|;gi|1098141029|emb|SFU00198.1|	hypothetical protein [Sedimentitalea nanhaiensis]<>phage putative head morphogenesis protein, SPP1 gp7 family [Sedimentitalea nanhaiensis]
Loki_gp04	27.39	241	121	8	115	309	81	313	1e-07	63.2	gi|640685677|ref|WP_025110092.1|	head morphogenesis protein [Pseudomonas sp. H1h]
Loki_gp04	27.27	242	122	8	114	309	80	313	1e-07	63.2	gi|913602684|ref|WP_050442876.1|;gi|612104390|gb|EZP62696.1|	head morphogenesis protein [Pseudomonas sp. RIT357]<>phage head morphogenesis protein [Pseudomonas sp. RIT357]
Loki_gp04	31.82	88	41	2	228	296	243	330	1e-07	63.2	gi|775459873|dbj|BAQ93545.1|;gi|775459934|dbj|BAQ93599.1|;gi|787052051|dbj|BAR24997.1|;gi|787052111|dbj|BAR25047.1|;gi|787052162|dbj|BAR25091.1|;gi|787052205|dbj|BAR25120.1|;gi|787052278|dbj|BAR25184.1|	putative head morphogenesis protein [uncultured Mediterranean phage uvMED]<>phage head morphogenesis protein [uncultured Mediterranean phage uvMED]<>phage head morphogenesis protein [uncultured Mediterranean phage uvMED]<>phage head morphogenesis protein [uncultured Mediterranean phage uvMED]<>phage head morphogenesis protein [uncultured Mediterranean phage uvMED]<>phage head morphogenesis protei…
Loki_gp04	27.43	237	123	8	114	309	61	289	1e-07	62.8	gi|962178372|gb|KTC63965.1|	phage head morphogenesis protein [Pseudomonas fluorescens ABAC62]
Loki_gp04	27.27	242	122	8	114	309	80	313	1e-07	62.8	gi|229362195|emb|CAY49097.1|	phage-related conserved hypothetical protein [Pseudomonas fluorescens SBW25]
Loki_gp04	29.73	111	46	2	232	310	224	334	1e-07	62.8	gi|916309575|ref|WP_051044621.1|	phage head morphogenesis protein [Methylobacterium sp. B1]
Loki_gp04	23.16	354	196	12	2	309	6	329	1e-07	62.8	gi|749668975|ref|WP_040267832.1|	head morphogenesis protein [Pseudomonas rhodesiae]
Loki_gp04	27.27	242	122	8	114	309	80	313	1e-07	62.8	gi|761532981|gb|AJP53299.1|	phage head morphogenesis protein [Pseudomonas fluorescens]
Loki_gp04	27.27	242	122	8	114	309	80	313	2e-07	62.8	gi|914234027|ref|WP_050549336.1|;gi|671397776|gb|KFF43662.1|	head morphogenesis protein [Pseudomonas sp. BRG-100]<>head morphogenesis protein [Pseudomonas sp. BRG-100]
Loki_gp04	30.51	177	99	5	114	274	80	248	2e-07	62.8	gi|1030112340|gb|ANF84801.1|	hypothetical protein A7J50_1368 [Pseudomonas antarctica]
Loki_gp04	32.37	139	61	4	204	309	175	313	2e-07	62.4	gi|1085857788|emb|SDS79413.1|	phage putative head morphogenesis protein, SPP1 gp7 family [Pseudomonas sp. Z003-0.4C(8344-21)]
Loki_gp04	22.32	354	199	10	2	309	12	335	2e-07	62.8	gi|949197887|gb|KRP59078.1|	head morphogenesis protein [Pseudomonas trivialis]
Loki_gp04	31.82	110	55	2	202	291	230	339	2e-07	62.8	gi|291336794|gb|ADD96329.1|	phage putative head morphogenesis protein SPP1 gp7 [uncultured organism MedDCM-OCT-S08-C700]
Loki_gp04	31.82	110	55	2	202	291	230	339	2e-07	62.4	gi|787048164|dbj|BAR22142.1|;gi|787048204|dbj|BAR22174.1|;gi|787048476|dbj|BAR22405.1|	phage putative head morphogenesis protein [uncultured Mediterranean phage uvMED]<>phage putative head morphogenesis protein [uncultured Mediterranean phage uvMED]<>phage putative head morphogenesis protein [uncultured Mediterranean phage uvMED]
Loki_gp04	27.27	242	122	8	114	309	80	313	2e-07	62.4	gi|1085996526|emb|SDU19329.1|	phage putative head morphogenesis protein, SPP1 gp7 family [Pseudomonas synxantha]
Loki_gp04	27.39	241	121	8	115	309	81	313	2e-07	62.4	gi|568200903|ref|WP_024075267.1|;gi|566063455|gb|AHC35556.1|	head morphogenesis protein [Pseudomonas sp. TKP]<>head morphogenesis protein [Pseudomonas sp. TKP]
Loki_gp04	32.69	104	47	2	228	308	226	329	2e-07	62.4	gi|503868127|ref|WP_014102121.1|;gi|347589856|gb|AEP08898.1|	phage head morphogenesis , SPP1 gp7 family domain-containing protein [Micavibrio aeruginosavorus]<>phage head morphogenesis , SPP1 gp7 family domain protein [Micavibrio aeruginosavorus ARL-13]
Loki_gp04	22.46	285	183	7	1	277	12	266	2e-07	62.4	gi|937456980|ref|YP_009168836.1|;gi|282534190|gb|ADA82298.1|	putative head protein, SPP1 gp7 family [Escherichia phage K1-dep(1)]<>putative head protein, SPP1 gp7 family [Escherichia phage K1-dep(1)]
Loki_gp04	32.8	125	52	3	200	296	187	307	2e-07	62.8	gi|1039496135|ref|WP_064832553.1|;gi|1037361153|gb|ANL84663.1|;gi|1037367669|gb|ANL91170.1|	hypothetical protein [Rhizobium phaseoli]<>phage head morphogenesis protein [Rhizobium phaseoli]<>phage head morphogenesis protein [Rhizobium phaseoli]
Loki_gp04	31.82	110	55	2	202	291	230	339	2e-07	62.4	gi|775458531|dbj|BAQ92335.1|;gi|787048251|dbj|BAR22220.1|;gi|787048311|dbj|BAR22269.1|;gi|787048353|dbj|BAR22306.1|;gi|787048426|dbj|BAR22370.1|;gi|787048505|dbj|BAR22428.1|;gi|787048575|dbj|BAR22484.1|	phage putative head morphogenesis protein [uncultured Mediterranean phage uvMED]<>phage putative head morphogenesis protein [uncultured Mediterranean phage uvMED]<>phage putative head morphogenesis protein [uncultured Mediterranean phage uvMED]<>phage putative head morphogenesis protein [uncultured Mediterranean phage uvMED]<>phage putative head morphogenesis protein [uncultured Mediterranean pha…
Loki_gp04	22.5	320	189	9	1	291	12	301	3e-07	62	gi|282547291|gb|ADA82348.1|	putative head protein, SPP1 gp7 family [Escherichia phage K1ind1]
Loki_gp04	26.86	242	123	8	114	309	80	313	3e-07	62	gi|949577238|ref|WP_057009006.1|;gi|1085879075|emb|SDS70295.1|	phage head morphogenesis protein [Pseudomonas trivialis]<>phage putative head morphogenesis protein, SPP1 gp7 family [Pseudomonas trivialis]
Loki_gp04	24.04	208	115	5	151	315	130	337	3e-07	61.6	gi|919148738|ref|WP_052704370.1|	phage head morphogenesis protein [Halomonas sp. S2151]
Loki_gp04	33.33	114	56	3	205	298	193	306	4e-07	61.6	gi|1133554315|ref|WP_076030712.1|;gi|1132399971|gb|APV42126.1|	phage head morphogenesis protein [Pseudomonas frederiksbergensis]<>phage head morphogenesis protein [Pseudomonas frederiksbergensis]
Loki_gp04	22.14	280	180	6	1	272	1	250	4e-07	61.6	gi|966203862|ref|YP_009191429.1|;gi|921956135|gb|ALA45588.1|	head morphogenesis protein [Enterobacter phage phiEap-2]<>head morphogenesis protein [Enterobacter phage phiEap-2]
Loki_gp04	36.11	108	64	4	191	293	162	269	5e-07	61.2	gi|759521417|ref|WP_043241753.1|	phage head morphogenesis protein [Pseudomonas alcaligenes]
Loki_gp04	22.88	354	197	12	2	309	6	329	5e-07	61.2	gi|734846641|ref|WP_034097519.1|	head morphogenesis protein [Pseudomonas fluorescens]
Loki_gp04	26.97	241	122	8	115	309	81	313	5e-07	61.2	gi|1120965063|ref|WP_073474177.1|;gi|1113056902|gb|OJT50047.1|	phage head morphogenesis protein [Pseudomonas moraviensis]<>phage head morphogenesis protein [Pseudomonas moraviensis]
Loki_gp04	25.45	275	177	9	1	272	1	250	5e-07	61.2	gi|734475520|ref|WP_034086611.1|;gi|557307853|ref|YP_008767176.1|;gi|550163881|gb|AGX84678.1|	head morphogenesis protein [Salmonella phage SETP7]<>putative head morphogenesis protein [Salmonella phage SETP7]<>putative head morphogenesis protein [Salmonella phage SETP7]
Loki_gp04	22.19	320	190	9	1	291	12	301	6e-07	60.8	gi|282535241|gb|ADA82447.1|	putative head protein, SPP1 gp7 family [Escherichia phage K1-ind(3)]
Loki_gp04	30.23	129	54	3	199	291	147	275	7e-07	61.6	gi|337731400|gb|AEI71211.1|	head protein [EBPR siphovirus 1]
Loki_gp04	35	100	51	3	199	284	240	339	7e-07	61.2	gi|291335423|gb|ADD95036.1|	hypothetical protein [uncultured phage MedDCM-OCT-S04-C26]
Loki_gp04	41.89	74	40	1	204	274	202	275	8e-07	60.8	gi|1124547203|ref|WP_074830560.1|;gi|1094888704|emb|SER50828.1|	phage head morphogenesis protein [Pseudomonas lutea]<>phage putative head morphogenesis protein, SPP1 gp7 family [Pseudomonas lutea]
Loki_gp04	22.19	320	190	9	1	291	12	301	9e-07	60.5	gi|282547343|gb|ADA82399.1|	putative head protein, SPP1 gp7 family [Escherichia phage K1-ind(2)]
Loki_gp04	26.56	241	123	8	115	309	81	313	1e-06	60.5	gi|515145313|ref|WP_016774004.1|	phage head morphogenesis protein [Pseudomonas sp. R62]
Loki_gp04	24.29	317	176	10	14	312	2	272	1e-06	60.1	gi|1124593413|ref|WP_074875401.1|;gi|1089266822|emb|SED30210.1|	phage head morphogenesis protein [Pseudomonas frederiksbergensis]<>phage putative head morphogenesis protein, SPP1 gp7 family [Pseudomonas frederiksbergensis]
Loki_gp04	26.56	241	123	8	115	309	81	313	1e-06	60.1	gi|966389529|ref|WP_058436293.1|;gi|962137965|gb|KTC36146.1|	phage head morphogenesis protein [Pseudomonas sp. ABAC61]<>phage head morphogenesis protein [Pseudomonas sp. ABAC61]
Loki_gp04	35	100	51	3	199	284	240	339	1e-06	60.8	gi|775458120|dbj|BAQ91963.1|;gi|775458263|dbj|BAQ92093.1|;gi|787046421|dbj|BAR20790.1|;gi|787068890|dbj|BAR38555.1|	phage head morphogenesis protein [uncultured Mediterranean phage uvMED]<>phage head morphogenesis protein [uncultured Mediterranean phage uvMED]<>phage head morphogenesis protein [uncultured Mediterranean phage uvMED]<>phage head morphogenesis protein [uncultured Mediterranean phage uvMED]
Loki_gp04	35	100	51	3	199	284	240	339	1e-06	60.5	gi|775458339|dbj|BAQ92164.1|	phage putative head morphogenesis protein [uncultured Mediterranean phage uvMED]
Loki_gp04	26.15	283	165	11	1	272	1	250	1e-06	60.1	gi|525972172|ref|YP_008239715.1|;gi|520728207|gb|AGP24894.1|	head morphogenesis protein [Salmonella phage Jersey]<>head morphogenesis protein [Salmonella phage Jersey]
Loki_gp04	35	100	51	3	199	284	240	339	1e-06	60.5	gi|775458381|dbj|BAQ92199.1|	minor head protein-like [uncultured Mediterranean phage uvMED]
Loki_gp04	35	100	51	3	199	284	240	339	1e-06	60.5	gi|775458167|dbj|BAQ92004.1|;gi|787046516|dbj|BAR20857.1|	minor head protein-like [uncultured Mediterranean phage uvMED]<>minor head protein-like [uncultured Mediterranean phage uvMED]
Loki_gp04	25.29	257	143	8	32	268	16	243	1e-06	59.7	gi|1067241369|gb|OED34532.1|	hypothetical protein AB832_07435 [Flavobacteriaceae bacterium (ex Bugula neritina AB1)]
Loki_gp04	34.48	87	40	2	229	298	204	290	1e-06	60.5	gi|1024906928|ref|WP_063540557.1|	hypothetical protein [Pseudomonas stutzeri]
Loki_gp04	34.65	101	57	3	182	275	193	291	2e-06	60.1	gi|1097040495|emb|SFE47431.1|	phage putative head morphogenesis protein, SPP1 gp7 family [Peptostreptococcus sp. D1]
Loki_gp05	100	239	0	0	1	239	1	239	3e-165	464	gi|949419296|emb|CUS06466.1|	putative scaffold protein [unclassified Siphoviridae]
Loki_gp05	67.52	234	75	1	1	234	1	233	4e-100	300	gi|589892177|ref|YP_009008542.1|;gi|583926731|gb|AHI60037.1|	putative scaffold protein [Acinetobacter phage IME_AB3]<>putative scaffold protein [Acinetobacter phage IME_AB3]
Loki_gp05	58.97	234	94	1	1	234	1	232	5e-84	259	gi|971751694|ref|YP_009205605.1|;gi|936761532|gb|ALH23591.1|	putative scaffold protein [Pseudomonas phage PaMx42]<>putative scaffold protein [Pseudomonas phage PaMx42]
Loki_gp05	58.97	234	94	1	1	234	1	232	1e-81	253	gi|399528724|ref|YP_006560761.1|;gi|371767560|gb|AEX56094.1|	hypothetical protein KL1_00010 [Burkholderia phage KL1]<>hypothetical protein KL1_00010 [Burkholderia phage KL1]
Loki_gp05	57.69	234	97	1	1	234	1	232	1e-80	250	gi|658311467|ref|YP_009044344.1|;gi|656178009|emb|CDN96770.1|	scaffold protein [Pseudomonas phage vB_PaeS_SCH_Ab26]<>scaffold protein [Pseudomonas phage vB_PaeS_SCH_Ab26]
Loki_gp05	56.41	234	100	1	1	234	1	232	8e-79	245	gi|388542669|ref|YP_006299874.1|;gi|378407737|gb|AFB83298.1|;gi|823081449|gb|AKI28804.1|	scaffold protein [Pseudomonas phage vB_Pae-Kakheti25]<>scaffold protein [Pseudomonas phage vB_Pae-Kakheti25]<>scaffold protein [Stenotrophomonas phage vB_SmaS-DLP_1]
Loki_gp05	56.41	234	100	1	1	234	1	232	4e-78	244	gi|971766241|ref|YP_009219167.1|;gi|823081390|gb|AKI28746.1|	scaffold protein [Stenotrophomonas phage vB_SmaS-DLP_2]<>scaffold protein [Stenotrophomonas phage vB_SmaS-DLP_2]
Loki_gp05	55.98	234	101	1	1	234	1	232	7e-78	243	gi|148912837|ref|YP_001293416.1|;gi|701904473|gb|AIW01674.1|	hypothetical protein ORF009 [Pseudomonas phage 73]<>hypothetical protein vB_Pae_PS9N_00023 [Pseudomonas phage vB_Pae_PS9N]
Loki_gp05	49.18	244	114	3	1	239	1	239	5e-65	210	gi|1088494522|gb|OHD25444.1|	hypothetical protein A2Y38_12865 [Spirochaetes bacterium GWB1_59_5]
Loki_gp05	51.46	239	115	1	1	239	1	238	6e-62	202	gi|910307494|gb|AKU43193.1|	scaffold protein [Rhodobacter phage RcSpartan]
Loki_gp05	52.89	225	94	3	1	217	1	221	7e-62	202	gi|764162032|ref|YP_009126428.1|;gi|746947750|gb|AJD83162.1|	scaffold protein [Paracoccus phage vB_PmaS_IMEP1]<>scaffold protein [Paracoccus phage vB_PmaS_IMEP1]
Loki_gp05	51.05	239	116	1	1	239	1	238	4e-61	201	gi|985760154|ref|YP_009225675.1|;gi|910307311|gb|AKU43027.1|	scaffold protein [Rhodobacter phage RcTitan]<>scaffold protein [Rhodobacter phage RcTitan]
Loki_gp05	39.08	238	139	1	1	232	1	238	4e-43	154	gi|971821762|ref|YP_009220344.1|;gi|827196342|gb|AKJ71368.1|	scaffold protein [Achromobacter phage phiAxp-1]<>scaffold protein [Achromobacter phage phiAxp-1]
Loki_gp05	45.6	193	104	1	1	192	1	193	5e-42	151	gi|1015669853|gb|AMW36126.1|	scaffold protein [Xanthomonas phage XAJ2]
Loki_gp05	38.29	222	126	3	3	213	1	222	3e-33	129	gi|971741685|ref|YP_009196195.1|;gi|746947358|gb|AJD82776.1|	hypothetical protein JWX_00010 [Achromobacter phage JWX]<>hypothetical protein JWX_00010 [Achromobacter phage JWX]
Loki_gp05	38.31	201	109	4	1	191	1	196	1e-31	125	gi|1100642010|gb|OIN16451.1|	hypothetical protein AO411_2021450 [Salmonella enterica subsp. enterica]
Loki_gp05	38.81	201	108	4	1	191	1	196	2e-31	124	gi|1092899619|ref|WP_070804554.1|;gi|1089752524|gb|OHF39929.1|	hypothetical protein [Salmonella enterica]<>hypothetical protein A7S32_24470 [Salmonella enterica subsp. diarizonae serovar 59:[k]:z35]
Loki_gp05	38.81	201	108	4	1	191	1	196	2e-31	124	gi|555264893|ref|WP_023246418.1|;gi|554389675|gb|ESJ21375.1|	hypothetical protein [Salmonella enterica]<>hypothetical protein SED60170_05157 [Salmonella enterica subsp. diarizonae serovar 60:r:e,n,x,z15 str. 01-0170]
Loki_gp05	40.7	199	111	5	3	199	2	195	1e-29	119	gi|645051772|ref|WP_025423053.1|;gi|573022370|gb|AHF77906.1|	hypothetical protein [Sodalis praecaptivus]<>Gp8 phage protein [Sodalis praecaptivus]
Loki_gp05	38.07	218	108	5	3	212	2	200	4e-29	118	gi|736915086|ref|WP_034913011.1|	hypothetical protein [Erwinia sp. 9145]
Loki_gp05	35.9	234	140	5	1	232	1	226	1e-28	117	gi|495732238|ref|WP_008456817.1|;gi|394731984|gb|EJF31705.1|	hypothetical protein [Enterobacter sp. Ag1]<>hypothetical protein A936_08933 [Enterobacter sp. Ag1]
Loki_gp05	39.32	206	104	6	3	199	2	195	3e-28	115	gi|836630813|ref|WP_047780532.1|;gi|827401632|gb|AKJ41792.1|	hypothetical protein [Pragia fontium]<>hypothetical protein QQ39_06605 [Pragia fontium]
Loki_gp05	40.19	209	116	6	3	207	2	205	3e-27	113	gi|653020796|ref|WP_027272697.1|;gi|668982407|gb|KFC95724.1|	hypothetical protein [Leminorella grimontii]<>phage protein [Leminorella grimontii ATCC 33999 = DSM 5078]
Loki_gp05	36.46	192	118	2	3	190	2	193	5e-27	112	gi|921139009|ref|WP_053089255.1|	MULTISPECIES: hypothetical protein [Enterobacterales]
Loki_gp05	34.74	190	123	1	3	191	2	191	2e-25	108	gi|495125474|ref|WP_007850285.1|;gi|426318818|emb|CCK02720.1|	hypothetical protein [Cronobacter sakazakii]<>hypothetical protein BN129_1282 [Cronobacter sakazakii 701]
Loki_gp05	35.71	224	128	8	3	221	2	214	2e-25	108	gi|490362600|ref|WP_004242361.1|;gi|468907348|gb|EMP49834.1|;gi|571173451|emb|CDK64057.1|;gi|1033291065|gb|OAS00259.1|;gi|1108397596|emb|SGE29254.1|	hypothetical protein [Morganella morganii]<>hypothetical protein C790_03340 [Morganella morganii SC01]<>Phage protein [Morganella morganii IS15]<>hypothetical protein AYO06_08735 [Morganella morganii]<>Uncharacterised protein [Mycobacterium tuberculosis]
Loki_gp05	38.89	198	108	4	3	188	1	197	2e-25	108	gi|971747944|ref|YP_009201742.1|;gi|746947424|gb|AJD82841.1|	hypothetical protein JWAP_00008 [Achromobacter phage 83-24]<>hypothetical protein JWAP_00008 [Achromobacter phage 83-24]
Loki_gp05	35.71	224	128	8	3	221	2	214	2e-25	108	gi|919978078|ref|WP_052926036.1|;gi|914275868|gb|KNZ89896.1|;gi|922850078|gb|KOO18944.1|;gi|1081365947|gb|OFV03477.1|;gi|1110015426|emb|SHM60956.1|	MULTISPECIES: hypothetical protein [Morganella]<>hypothetical protein AKG16_01525 [Morganella morganii]<>hypothetical protein AC068_09495 [Morganella morganii]<>hypothetical protein HMPREF3119_02125 [Morganella sp. HMSC11D09]<>hypothetical protein SAMN05216301_2690 [Morganella morganii]
Loki_gp05	34.21	190	124	1	3	191	2	191	6e-25	107	gi|504541124|ref|WP_014728226.1|;gi|401817595|ref|YP_006590037.1|;gi|383389980|gb|AFH14954.1|;gi|387850365|gb|AFJ98462.1|	hypothetical protein [Cronobacter sakazakii]<>hypothetical protein phiES15_032 [Cronobacter phage phiES15]<>hypothetical protein phiES15_032 [Cronobacter phage phiES15]<>hypothetical protein ES15_0889 [Cronobacter sakazakii ES15]
Loki_gp05	35.71	224	128	8	3	221	2	214	7e-25	107	gi|738463767|ref|WP_036414533.1|;gi|721584326|gb|KGZ27603.1|	hypothetical protein [Morganella morganii]<>hypothetical protein MC49_12895 [Morganella morganii]
Loki_gp05	36.36	209	120	7	3	203	2	205	7e-25	107	gi|1130352504|emb|SIP75034.1|	conserved hypothetical protein [Xenorhabdus innexi]
Loki_gp05	36.65	191	111	5	3	188	2	187	5e-24	105	gi|516224837|ref|WP_017628800.1|;gi|721499059|gb|KGY42580.1|;gi|721596411|gb|KGZ39679.1|;gi|1017170271|gb|KZE58098.1|	hypothetical protein [Proteus mirabilis]<>hypothetical protein MC73_12985 [Proteus mirabilis]<>hypothetical protein MC46_11775 [Proteus mirabilis]<>hypothetical protein AV652_16100 [Proteus mirabilis]
Loki_gp05	34.18	237	138	7	3	232	2	227	7e-24	104	gi|1124643633|ref|WP_074924204.1|;gi|1097635677|emb|SFH27570.1|	hypothetical protein [Proteus mirabilis]<>hypothetical protein SAMN04487853_11422 [Proteus mirabilis]
Loki_gp05	36.65	191	111	5	3	188	2	187	7e-24	104	gi|739038871|ref|WP_036919950.1|;gi|721561684|gb|KGZ05008.1|;gi|1026618493|gb|AND13490.1|;gi|1081381364|gb|OFV18396.1|	MULTISPECIES: hypothetical protein [Proteus]<>hypothetical protein MC53_16225 [Proteus mirabilis]<>hypothetical protein AOUC001_11545 [Proteus mirabilis]<>hypothetical protein HMPREF3129_09410 [Proteus sp. HMSC14B05]
Loki_gp05	36.65	191	111	5	3	188	2	187	7e-24	104	gi|739100867|ref|WP_036971534.1|;gi|702063799|gb|KGQ15575.1|;gi|1086460704|emb|SDD07488.1|;gi|1100282670|gb|OIK54325.1|	hypothetical protein [Proteus mirabilis]<>hypothetical protein NX82_11700 [Proteus mirabilis]<>hypothetical protein SAMN05216484_11549 [Proteus mirabilis]<>hypothetical protein BE839_09930 [Proteus mirabilis]
Loki_gp05	36.65	191	111	5	3	188	2	187	8e-24	104	gi|983376398|ref|WP_060554536.1|;gi|960442304|gb|KSW23680.1|	hypothetical protein [Proteus mirabilis]<>hypothetical protein OJ22_02275 [Proteus mirabilis]
Loki_gp05	36.65	191	111	5	3	188	2	187	1e-23	103	gi|739013608|ref|WP_036895046.1|;gi|721503227|gb|KGY46719.1|	hypothetical protein [Proteus mirabilis]<>hypothetical protein MC72_08650 [Proteus mirabilis]
Loki_gp05	35.6	191	113	5	3	188	2	187	3e-23	102	gi|739064467|ref|WP_036935878.1|;gi|685171463|gb|KGA59120.1|	hypothetical protein [Proteus vulgaris]<>hypothetical protein DR95_386 [Proteus vulgaris]
Loki_gp05	31.78	236	145	6	3	232	2	227	6e-22	99.8	gi|1093686614|ref|WP_070929140.1|;gi|1091550322|gb|OHT23162.1|	hypothetical protein [Providencia stuartii]<>hypothetical protein A3Q29_06965 [Providencia stuartii]
Loki_gp05	33.49	209	127	5	3	203	2	206	1e-21	99	gi|917269224|ref|WP_051875936.1|;gi|666636861|emb|CDH23180.1|	hypothetical protein [Xenorhabdus bovienii]<>conserved hypothetical protein [Xenorhabdus bovienii str. kraussei Becker Underwood]
Loki_gp05	37.2	207	118	7	3	203	2	202	4e-21	97.4	gi|318064388|gb|ADV36425.1|	hypothetical protein [Edwardsiella phage eiAU]
Loki_gp05	36.59	205	122	7	3	203	2	202	8e-21	96.7	gi|589889307|ref|YP_009004692.1|;gi|318064502|gb|ADV36480.1|;gi|574093604|gb|AHG23461.1|;gi|574093659|gb|AHG23515.1|	hypothetical protein O197_45 [Edwardsiella phage eiAU-183]<>hypothetical protein [Edwardsiella phage eiDWF]<>hypothetical protein P858_45 [Edwardsiella phage eiAU]<>hypothetical protein O197_45 [Edwardsiella phage eiAU-183]
Loki_gp05	33.49	209	128	6	3	206	2	204	9e-21	96.7	gi|1097307050|emb|SFU43717.1|	hypothetical protein SAMN05421784_1075 [Xenorhabdus koppenhoeferi]
Loki_gp05	36.59	205	122	7	3	203	2	202	1e-20	96.3	gi|318064600|gb|ADV36529.1|	hypothetical protein [Edwardsiella phage eiMSLS]
Loki_gp05	33.97	209	125	7	3	203	2	205	1e-20	96.3	gi|1097471578|emb|SFO05779.1|	hypothetical protein SAMN05421579_1528 [Xenorhabdus japonica]
Loki_gp05	32.54	209	129	5	3	203	2	206	2e-20	95.5	gi|1062641598|ref|WP_069315915.1|;gi|1062464959|gb|AOM40176.1|	hypothetical protein [Xenorhabdus hominickii]<>hypothetical protein A9255_06035 [Xenorhabdus hominickii]
Loki_gp05	35.48	124	79	1	78	200	1	124	5e-20	92.4	gi|696400958|ref|WP_032972972.1|	hypothetical protein, partial [Cronobacter malonaticus]
Loki_gp05	34.58	214	130	5	1	210	1	208	1e-19	93.6	gi|1067241358|gb|OED34521.1|	hypothetical protein AB832_07430 [Flavobacteriaceae bacterium (ex Bugula neritina AB1)]
Loki_gp05	34.4	218	119	10	3	207	1	207	7e-17	86.3	gi|861651440|gb|KMQ97799.1|	phage protein [Lasius niger]
Loki_gp05	33.33	192	121	4	5	190	2	192	1e-16	85.9	gi|1125679101|ref|WP_075040156.1|	hypothetical protein [Acinetobacter radioresistens]
Loki_gp05	31.07	206	124	4	1	192	1	202	7e-16	84	gi|817917522|gb|AKG14169.1|	hypothetical protein AAX11_09245 [Moraxella bovoculi]
Loki_gp05	30.58	206	125	4	1	192	1	202	2e-15	82.4	gi|817909176|gb|AKG07052.1|;gi|817915114|gb|AKG12197.1|	hypothetical protein AAX06_01370 [Moraxella bovoculi]<>hypothetical protein AAX07_09695 [Moraxella bovoculi]
Loki_gp05	33.33	216	119	9	1	199	1	208	6e-14	78.6	gi|941467919|ref|WP_055125784.1|	hypothetical protein [Psychrobacter glacincola]
Loki_gp05	35.29	119	75	1	74	190	74	192	6e-14	78.6	gi|1033177484|ref|WP_064481601.1|;gi|1029175744|gb|ANF26028.1|	hypothetical protein [Pseudomonas stutzeri]<>hypothetical protein PS273GM_13180 [Pseudomonas stutzeri]
Loki_gp05	34.2	193	106	6	5	184	2	186	9e-14	77.8	gi|495580034|ref|WP_008304613.1|;gi|388610376|gb|EIM39499.1|	hypothetical protein [Acinetobacter sp. HA]<>hypothetical protein HADU_06619 [Acinetobacter sp. HA]
Loki_gp05	32.64	193	109	6	5	184	2	186	1e-12	74.7	gi|490783154|ref|WP_004645323.1|;gi|479865057|gb|ENU16967.1|;gi|554689334|gb|ESJ96401.1|	MULTISPECIES: hypothetical protein [Acinetobacter]<>hypothetical protein F995_00587 [Acinetobacter sp. CIP A162]<>hypothetical protein P800_01225 [Acinetobacter lwoffii NCTC 5866 = CIP 64.10 = NIPH 512]
Loki_gp05	32.64	193	109	6	5	184	2	186	2e-12	73.9	gi|1133555823|ref|WP_076032213.1|;gi|1132452428|gb|APV35053.1|	hypothetical protein [Acinetobacter soli]<>hypothetical protein BEN76_03045 [Acinetobacter soli]
Loki_gp05	29.85	201	114	7	1	184	1	191	7e-12	72.8	gi|829063994|ref|WP_047297588.1|	hypothetical protein [Pseudomonas fluorescens]
Loki_gp05	37.23	137	77	2	50	184	59	188	8e-12	72.4	gi|490833847|ref|WP_004695931.1|;gi|479889145|gb|ENU39299.1|	hypothetical protein [Acinetobacter johnsonii]<>hypothetical protein F986_02083 [Acinetobacter johnsonii CIP 64.6]
Loki_gp05	34.81	135	81	2	57	184	57	191	1e-11	72.4	gi|1028163967|ref|WP_063912504.1|	hypothetical protein [Pseudomonas sp. p21]
Loki_gp05	35.77	137	75	3	54	184	62	191	1e-11	72	gi|939335458|ref|WP_054881771.1|	hypothetical protein [Pseudomonas sp. NBRC 111128]
Loki_gp05	35.77	137	75	3	54	184	62	191	1e-11	72	gi|512729850|ref|WP_016487764.1|;gi|511522037|gb|AGN79578.1|	hypothetical protein [Pseudomonas putida]<>hypothetical protein L483_20360 [Pseudomonas putida H8234]
Loki_gp05	31.13	212	125	8	3	205	1	200	1e-11	72	gi|953318547|ref|WP_057978818.1|;gi|949219614|gb|KRP80621.1|;gi|949219969|gb|KRP80974.1|	hypothetical protein [Pseudomonas sp. DSM 28142]<>hypothetical protein TX25_29900 [Pseudomonas sp. DSM 28142]<>hypothetical protein TX25_29805 [Pseudomonas sp. DSM 28142]
Loki_gp05	33.33	195	122	6	5	193	1	193	2e-11	71.6	gi|225220108|ref|YP_002720075.1|;gi|414090267|ref|YP_006990382.1|;gi|224986049|gb|ACN74613.1|;gi|409995334|gb|AFV51272.1|	hypothetical protein AV954_gp09 [Escherichia virus SSL2009a]<>hypothetical protein JL1_55 [Escherichia virus JL1]<>hypothetical protein [Escherichia virus SSL2009a]<>hypothetical protein JL1_55 [Escherichia virus JL1]
Loki_gp05	29.53	193	125	4	1	184	1	191	2e-11	71.6	gi|1084319897|ref|WP_070384088.1|;gi|1082506853|gb|AOX09994.1|	hypothetical protein [Pseudomonas putida]<>hypothetical protein Q5O_16855 [Pseudomonas putida JB]
Loki_gp05	35.04	137	76	3	54	184	62	191	2e-11	71.6	gi|654449350|ref|WP_027919802.1|	hypothetical protein [Pseudomonas sp. URMO17WK12:I8]
Loki_gp05	30.93	194	121	5	1	184	1	191	2e-11	71.6	gi|959908635|ref|WP_058172780.1|;gi|955968329|gb|KSE30364.1|	hypothetical protein [Pseudomonas aeruginosa]<>hypothetical protein AO916_20235 [Pseudomonas aeruginosa]
Loki_gp05	32.33	133	83	2	60	185	60	192	2e-11	71.6	gi|1022670536|ref|WP_063426738.1|;gi|1021682108|gb|KZO52299.1|	hypothetical protein [Pseudomonas putida]<>hypothetical protein A3L25_10555 [Pseudomonas putida]
Loki_gp05	33.33	195	122	6	5	193	1	193	2e-11	71.2	gi|682122964|ref|YP_009055287.1|;gi|1070067241|ref|YP_009291458.1|;gi|1070103518|ref|YP_009288160.1|;gi|673940001|gb|AIK68721.1|;gi|1049308619|gb|ANY29668.1|;gi|1049308685|gb|ANY29733.1|;gi|1049308908|gb|ANY29953.1|	hypothetical protein EK99P-1_0009 [Enterobacteria phage EK99P-1]<>hypothetical protein [Escherichia phage Gluttony]<>hypothetical protein [Escherichia phage Envy]<>hypothetical protein EK99P-1_0009 [Enterobacteria phage EK99P-1]<>hypothetical protein [Escherichia phage Envy]<>hypothetical protein [Escherichia phage Gluttony]<>hypothetical protein [Escherichia phage Sloth]
Loki_gp05	33.33	195	122	6	5	193	1	193	2e-11	71.2	gi|1049308834|gb|ANY29880.1|;gi|1049308967|gb|ANY30010.1|	hypothetical protein [Escherichia phage Lust]<>hypothetical protein [Escherichia phage Pride]
Loki_gp05	33.33	195	122	6	5	193	1	193	3e-11	71.2	gi|371496277|ref|YP_004957445.1|;gi|428782864|ref|YP_007112614.1|;gi|971754254|ref|YP_009208113.1|;gi|359840894|gb|AEV89326.1|;gi|383395070|gb|AFH20512.1|;gi|932862914|emb|CUL02165.1|;gi|932863001|emb|CUL02251.1|	hypothetical protein EP23p09 [Shigella phage EP23]<>hypothetical protein HK578_007 [Escherichia phage HK578]<>hypothetical protein [Escherichia phage slur05]<>hypothetical protein EP23p09 [Shigella phage EP23]<>hypothetical protein HK578_007 [Escherichia phage HK578]<>hypothetical protein [Escherichia phage slur05]<>hypothetical protein [Escherichia phage slur06]
Loki_gp05	32.22	180	112	6	15	185	11	189	3e-11	70.9	gi|970260032|ref|WP_058644714.1|;gi|967416888|gb|KTK88000.1|	hypothetical protein [Acinetobacter sp. FDAARGOS_131]<>hypothetical protein AL489_11625 [Acinetobacter sp. FDAARGOS_131]
Loki_gp05	33.33	195	122	6	5	193	1	193	3e-11	70.9	gi|849255337|ref|YP_009152275.1|;gi|723005898|gb|AIX11815.1|	hypothetical protein EpYD_34 [Escherichia phage YD-2008.s]<>hypothetical protein EpYD_34 [Escherichia phage YD-2008.s]
Loki_gp05	29.44	197	122	6	1	185	1	192	3e-11	70.9	gi|896290551|ref|WP_049273189.1|	hypothetical protein [Pseudomonas putida]
Loki_gp05	30.9	178	108	4	19	184	16	190	4e-11	70.9	gi|1026752905|gb|OAE15533.1|	hypothetical protein A2T76_17875 [Pseudomonas brenneri]
Loki_gp05	33.33	195	122	6	5	193	39	231	4e-11	71.2	gi|273810562|ref|YP_003344943.1|;gi|258619847|gb|ACV84100.1|	gp8 [Sodalis phage SO1]<>gp8 [Sodalis phage SO1]
Loki_gp05	30.1	196	120	6	1	184	1	191	4e-11	70.5	gi|727236351|ref|WP_033697009.1|;gi|666447844|gb|KEY87822.1|	hypothetical protein [Pseudomonas sp. WCS358]<>hypothetical protein PC358_01545 [Pseudomonas sp. WCS358]
Loki_gp05	33.91	174	104	5	20	184	17	188	5e-11	70.5	gi|497802659|ref|WP_010116843.1|	hypothetical protein [Acinetobacter sp. P8-3-8]
Loki_gp05	31.25	192	117	5	5	184	2	190	5e-11	70.5	gi|1087056559|emb|SDQ68511.1|	hypothetical protein SAMN05216487_3268 [Pseudomonas sp. UC 17F4]
Loki_gp05	30.9	178	108	4	19	184	16	190	5e-11	70.5	gi|545129709|ref|WP_021491141.1|;gi|542014925|gb|ERH60760.1|	hypothetical protein [Pseudomonas fluorescens]<>hypothetical protein O204_17025 [Pseudomonas fluorescens EGD-AQ6]
Loki_gp05	34.78	115	69	1	76	184	77	191	5e-11	70.5	gi|940189517|gb|KPY02018.1|	Uncharacterized protein ALO63_02734 [Pseudomonas amygdali pv. mori]
Loki_gp05	33.58	134	83	1	57	184	58	191	6e-11	70.1	gi|501230018|ref|WP_012273036.1|;gi|166860900|gb|ABY99307.1|	hypothetical protein [Pseudomonas putida]<>conserved hypothetical protein [Pseudomonas putida GB-1]
Loki_gp05	35.4	113	67	1	78	184	79	191	7e-11	70.1	gi|495707256|ref|WP_008431835.1|;gi|395341305|gb|EJF73124.1|	hypothetical protein [Pseudomonas sp. Ag1]<>hypothetical protein A462_04806 [Pseudomonas sp. Ag1]
Loki_gp05	33.89	180	109	6	15	185	11	189	2e-10	68.9	gi|691139820|ref|WP_032053216.1|;gi|593645486|gb|EXS25562.1|	hypothetical protein [Acinetobacter baumannii]<>hypothetical protein J658_0310 [Acinetobacter baumannii 573719]
Loki_gp05	35.14	111	66	1	80	184	81	191	2e-10	68.9	gi|1092624489|ref|WP_070571303.1|;gi|1081128529|gb|OFS77161.1|	hypothetical protein [Pseudomonas sp. HMSC08G10]<>hypothetical protein HMPREF3173_01870 [Pseudomonas sp. HMSC08G10]
Loki_gp05	32.76	174	108	2	20	184	18	191	3e-10	68.2	gi|1033147372|ref|WP_064453168.1|;gi|1030114683|gb|ANF87144.1|	hypothetical protein [Pseudomonas antarctica]<>hypothetical protein A7J50_3771 [Pseudomonas antarctica]
Loki_gp05	34.51	113	68	1	78	184	79	191	3e-10	68.2	gi|515824322|ref|WP_017255075.1|	hypothetical protein [Pseudomonas tolaasii]
Loki_gp05	29.02	193	126	4	1	184	1	191	4e-10	67.8	gi|655594722|ref|WP_028941817.1|	hypothetical protein [Pseudomonas vranovensis]
Loki_gp05	32.98	191	108	6	3	184	1	180	5e-10	67.4	gi|949576198|ref|WP_057007966.1|;gi|1085880332|emb|SDT07582.1|	hypothetical protein [Pseudomonas trivialis]<>hypothetical protein SAMN04490205_4669 [Pseudomonas trivialis]
Loki_gp05	30.85	201	115	8	1	184	1	194	7e-10	67.4	gi|1069569882|gb|OEH66770.1|	hypothetical protein BAX61_13270 [Psychrobacter sp. B29-1]
Loki_gp05	31.3	131	87	2	80	207	80	210	8e-10	67	gi|1024906926|ref|WP_063540556.1|;gi|1024419909|gb|KZX63189.1|	hypothetical protein [Pseudomonas stutzeri]<>hypothetical protein A3710_17220 [Pseudomonas stutzeri]
Loki_gp05	33.33	105	68	2	81	184	85	188	9e-10	67	gi|1070621468|ref|YP_009302941.1|;gi|695256192|gb|AIT13843.1|	scaffold protein [Salmonella phage BP63]<>scaffold protein [Salmonella phage BP63]
Loki_gp05	34.51	113	68	1	78	184	78	190	1e-09	66.6	gi|520814010|ref|WP_020300114.1|;gi|515455549|gb|EPL03887.1|	hypothetical protein [Pseudomonas sp. CF161]<>hypothetical protein CF161_28750 [Pseudomonas sp. CF161]
Loki_gp05	34.23	111	67	1	80	184	81	191	1e-09	66.6	gi|518557003|ref|WP_019727210.1|;gi|937559980|gb|ALI58909.1|;gi|956502129|gb|KSJ55016.1|;gi|956761433|gb|KSM09965.1|;gi|1084368304|gb|AOX32992.1|;gi|1100618373|gb|APB57076.1|	hypothetical protein [Pseudomonas aeruginosa]<>hypothetical protein CCBH4851_00205 [Pseudomonas aeruginosa]<>hypothetical protein APA05_05195 [Pseudomonas aeruginosa]<>hypothetical protein APA61_29425 [Pseudomonas aeruginosa]<>hypothetical protein PA8281_05731 [Pseudomonas aeruginosa]<>hypothetical protein PA7790_05793 [Pseudomonas aeruginosa]
Loki_gp05	34.23	111	67	1	80	184	81	191	1e-09	66.2	gi|740624015|ref|WP_038409527.1|;gi|635294508|gb|AHZ77250.1|	hypothetical protein [Pseudomonas putida]<>hypothetical protein DW66_2739 [Pseudomonas putida]
Loki_gp05	33.04	112	69	1	80	185	81	192	2e-09	66.2	gi|519035850|ref|WP_020191725.1|	hypothetical protein [Pseudomonas putida]
Loki_gp05	32.14	112	70	1	80	185	81	192	2e-09	65.9	gi|983303320|ref|WP_060489630.1|;gi|1034240824|gb|ANI33860.1|	MULTISPECIES: hypothetical protein [Pseudomonas]<>hypothetical protein AA098_10370 [Pseudomonas sp. JY-Q]
Loki_gp05	33.33	111	68	1	80	184	81	191	2e-09	65.9	gi|820875049|ref|WP_046787136.1|	hypothetical protein [Pseudomonas putida]
Loki_gp05	35.51	138	83	1	80	211	81	218	3e-09	65.5	gi|505082747|ref|WP_015269849.1|;gi|430792778|gb|AGA72973.1|;gi|1004522564|gb|KYC26104.1|;gi|1049774415|gb|ANY87660.1|;gi|1120731204|gb|APO81650.1|	MULTISPECIES: hypothetical protein [Pseudomonas]<>hypothetical protein B479_10355 [Pseudomonas putida HB3267]<>hypothetical protein WM94_04550 [Pseudomonas sp. ABFPK]<>hypothetical protein IEC33019_2101 [Pseudomonas putida]<>hypothetical protein BL240_09405 [Pseudomonas sp. DRA525]
Loki_gp05	31.41	191	111	6	3	184	1	180	4e-09	65.1	gi|1033049467|ref|WP_064361201.1|;gi|1013849962|gb|AMT89819.1|	hypothetical protein [Pseudomonas koreensis]<>hypothetical protein AYO71_20580 [Pseudomonas koreensis]
Loki_gp06	100	327	0	0	1	327	1	327	0	669	gi|949419297|emb|CUS06467.1|	putative major capsid protein [unclassified Siphoviridae]
Loki_gp06	80.73	327	63	0	1	327	1	327	0	553	gi|589892176|ref|YP_009008541.1|;gi|583926730|gb|AHI60036.1|	putative major capsid protein [Acinetobacter phage IME_AB3]<>putative major capsid protein [Acinetobacter phage IME_AB3]
Loki_gp06	60.98	328	123	3	1	327	1	324	1e-139	407	gi|971751693|ref|YP_009205606.1|;gi|936761531|gb|ALH23590.1|	major head protein [Pseudomonas phage PaMx42]<>major head protein [Pseudomonas phage PaMx42]
Loki_gp06	61.28	328	122	3	1	327	1	324	2e-138	404	gi|658311468|ref|YP_009044345.1|;gi|656178010|emb|CDN96771.1|	major capsid protein [Pseudomonas phage vB_PaeS_SCH_Ab26]<>major capsid protein [Pseudomonas phage vB_PaeS_SCH_Ab26]
Loki_gp06	60.67	328	124	3	1	327	1	324	3e-138	403	gi|399528725|ref|YP_006560762.1|;gi|371767561|gb|AEX56095.1|	major capsid protein [Burkholderia phage KL1]<>major capsid protein [Burkholderia phage KL1]
Loki_gp06	61.4	329	121	4	1	327	1	325	1e-137	401	gi|148912838|ref|YP_001293417.1|;gi|388542670|ref|YP_006299875.1|;gi|378407738|gb|AFB83299.1|;gi|701904474|gb|AIW01675.1|	hypothetical protein ORF010 [Pseudomonas phage 73]<>major capsid protein [Pseudomonas phage vB_Pae-Kakheti25]<>major capsid protein [Pseudomonas phage vB_Pae-Kakheti25]<>hypothetical protein vB_Pae_PS9N_00024 [Pseudomonas phage vB_Pae_PS9N]
Loki_gp06	61.09	329	122	4	1	327	1	325	6e-137	400	gi|971766236|ref|YP_009219168.1|;gi|823081385|gb|AKI28741.1|	major capsid protein [Stenotrophomonas phage vB_SmaS-DLP_2]<>major capsid protein [Stenotrophomonas phage vB_SmaS-DLP_2]
Loki_gp06	61.09	329	122	4	1	327	1	325	8e-137	399	gi|823081444|gb|AKI28799.1|	major capsid protein [Stenotrophomonas phage vB_SmaS-DLP_1]
Loki_gp06	58.97	329	123	5	1	327	1	319	4e-129	380	gi|764162033|ref|YP_009126429.1|;gi|746947751|gb|AJD83163.1|	major capsid protein [Paracoccus phage vB_PmaS_IMEP1]<>major capsid protein [Paracoccus phage vB_PmaS_IMEP1]
Loki_gp06	55.69	325	139	2	1	324	1	321	3e-124	368	gi|985760155|ref|YP_009225676.1|;gi|910307312|gb|AKU43028.1|;gi|910307495|gb|AKU43194.1|	major capsid protein [Rhodobacter phage RcTitan]<>major capsid protein [Rhodobacter phage RcTitan]<>major capsid protein [Rhodobacter phage RcSpartan]
Loki_gp06	53.85	325	143	2	1	324	1	319	2e-117	350	gi|971821763|ref|YP_009220345.1|;gi|827196343|gb|AKJ71369.1|	major capsid protein [Achromobacter phage phiAxp-1]<>major capsid protein [Achromobacter phage phiAxp-1]
Loki_gp06	54.66	311	135	3	17	327	1	305	2e-114	342	gi|1088494526|gb|OHD25448.1|	hypothetical protein A2Y38_12870 [Spirochaetes bacterium GWB1_59_5]
Loki_gp06	54.35	322	138	3	5	326	4	316	4e-110	332	gi|655288715|ref|WP_028697961.1|	MULTISPECIES: hypothetical protein [Pseudomonas putida group]
Loki_gp06	53.11	322	142	3	5	326	4	316	5e-108	326	gi|1012828803|ref|WP_062823001.1|;gi|1012291959|gb|AMS13148.1|	hypothetical protein [Pseudomonas chlororaphis]<>hypothetical protein A3218_02010 [Pseudomonas chlororaphis]
Loki_gp06	52.48	322	144	3	5	326	4	316	3e-105	319	gi|1089293156|emb|SEC00035.1|	hypothetical protein SAMN05216205_1200 [Pseudomonas mohnii]
Loki_gp06	51.86	322	146	3	5	326	4	316	4e-104	316	gi|835501020|ref|WP_047528625.1|	hypothetical protein [Pseudomonas sp. 11/12A]
Loki_gp06	50.31	324	148	3	5	327	4	315	1e-100	307	gi|1128877713|ref|WP_075272051.1|	hypothetical protein [Mannheimia haemolytica]
Loki_gp06	50	324	149	3	5	327	4	315	8e-100	305	gi|493292427|ref|WP_006250111.1|;gi|971760491|ref|YP_009213766.1|;gi|153094515|gb|EDN75349.1|;gi|452087424|gb|EME03803.1|;gi|523433210|gb|AGQ39847.1|;gi|526273497|gb|AGR73697.1|;gi|528824531|gb|EPZ01357.1|;gi|528872767|gb|EPZ23881.1|;gi|528872818|gb|EPZ23928.1|;gi|528876129|gb|EPZ27166.1|;gi|738492652|gb|AJA73293.1|;gi|785796741|gb|AKA11118.1|;gi|785799867|gb|AKA13835.1|;gi|1009043909|gb|KYL10185…	hypothetical protein [Mannheimia haemolytica]<>hypothetical protein 1152AP2_08 [Mannheimia phage vB_MhS_1152AP2]<>hypothetical bacteriophage protein [Mannheimia haemolytica PHL213]<>hypothetical protein F388_05174 [Mannheimia haemolytica serotype 6 str. H23]<>hypothetical protein J451_00910 [Mannheimia haemolytica D174]<>hypothetical protein N220_05610 [Mannheimia haemolytica USMARC_2286]<>hypoth…
Loki_gp06	50	324	149	3	5	327	4	315	1e-99	305	gi|1128877066|ref|WP_075271885.1|	hypothetical protein [Mannheimia haemolytica]
Loki_gp06	48.92	323	159	3	5	327	4	320	2e-99	305	gi|881044962|ref|WP_048763811.1|	hypothetical protein [Acinetobacter sp. 243_ASPC]
Loki_gp06	51.39	323	147	4	5	326	4	317	2e-99	304	gi|972003662|ref|WP_058952029.1|;gi|971495922|gb|ALV73087.1|	hypothetical protein [Acinetobacter johnsonii]<>hypothetical protein RZ95_09375 [Acinetobacter johnsonii XBB1]
Loki_gp06	51.39	323	147	4	5	326	4	317	2e-99	304	gi|490869321|ref|WP_004731336.1|;gi|479913949|gb|ENU62500.1|	hypothetical protein [Acinetobacter lwoffii]<>hypothetical protein F980_01826 [Acinetobacter lwoffii NIPH 715]
Loki_gp06	49.38	322	151	3	5	326	4	313	4e-99	303	gi|692422871|ref|WP_032137071.1|	hypothetical protein [Kingella sp. Sch538]
Loki_gp06	49.06	320	156	3	5	324	4	316	4e-99	303	gi|1031530142|ref|WP_064103605.1|;gi|1030146994|gb|OAM16276.1|	hypothetical protein [Eikenella corrodens]<>hypothetical protein A7P84_08145 [Eikenella corrodens]
Loki_gp06	47.37	323	160	2	5	327	4	316	6e-97	298	gi|544686747|ref|WP_021118474.1|;gi|529270472|gb|EQA13073.1|;gi|1102276594|gb|OIT25597.1|	hypothetical protein [[Haemophilus] parasuis]<>hypothetical protein HPS174_0881 [Haemophilus parasuis 174]<>hypothetical protein BLL93_02145 [[Haemophilus] parasuis]
Loki_gp06	49.07	322	148	4	5	326	4	309	7e-97	297	gi|488719172|ref|WP_002643048.1|;gi|294482226|gb|EFG29925.1|	hypothetical protein [Simonsiella muelleri]<>hypothetical protein HMPREF9021_02244 [Simonsiella muelleri ATCC 29453]
Loki_gp06	47.06	323	161	2	5	327	4	316	2e-96	297	gi|544684982|ref|WP_021116797.1|;gi|529268365|gb|EQA11058.1|;gi|666684829|gb|KEZ23994.1|	hypothetical protein [[Haemophilus] parasuis]<>hypothetical protein HPSD74_0302 [Haemophilus parasuis D74]<>hypothetical protein HS327_00025 [[Haemophilus] parasuis]
Loki_gp06	47.83	322	160	2	5	326	4	317	2e-95	294	gi|447038368|ref|WP_001115624.1|;gi|322508815|gb|ADX04269.1|;gi|469494864|gb|AGH35042.1|;gi|884695141|gb|KMV09445.1|;gi|902758897|emb|CRX65373.1|;gi|1066968766|gb|AOP64160.1|	hypothetical protein [Acinetobacter baumannii]<>Hypothetical bacteriophage protein [Acinetobacter baumannii 1656-2]<>hypothetical protein ABD1_11540 [Acinetobacter baumannii D1279779]<>hypothetical protein AB988_4275 [Acinetobacter baumannii]<>hypothetical protein ABR2090_2457 [Acinetobacter baumannii]<>hypothetical protein DU202_03005 [Acinetobacter baumannii DU202]
Loki_gp06	46.75	323	162	2	5	327	4	316	4e-95	293	gi|1130438682|ref|WP_075606718.1|	hypothetical protein [[Haemophilus] parasuis]
Loki_gp06	48.77	324	156	4	5	327	4	318	1e-94	292	gi|737282860|ref|WP_035266212.1|;gi|612174161|gb|EZQ10744.1|	hypothetical protein [Acinetobacter sp. Ver3]<>hypothetical protein CL42_06320 [Acinetobacter sp. Ver3]
Loki_gp06	48.3	323	155	4	5	326	4	315	1e-94	292	gi|1042210401|ref|WP_065265041.1|;gi|1041998449|gb|OBX86847.1|	hypothetical protein [Haemophilus sp. CCUG 66565]<>hypothetical protein A9501_02550 [Haemophilus sp. CCUG 66565]
Loki_gp06	47.19	320	162	3	5	324	4	316	1e-94	292	gi|1031418867|ref|WP_064087685.1|;gi|1030150361|gb|OAM19611.1|	hypothetical protein [Eikenella corrodens]<>hypothetical protein A7P90_05450 [Eikenella corrodens]
Loki_gp06	48.3	323	155	4	5	326	4	315	1e-94	292	gi|491870260|ref|WP_005643804.1|;gi|341952250|gb|EGT78782.1|;gi|1073509408|gb|OEY75831.1|;gi|1073510190|gb|OEY76598.1|	MULTISPECIES: hypothetical protein [Haemophilus]<>putative bacteriophage protein [Haemophilus haemolyticus M21639]<>hypothetical protein BFQ29_08630 [Haemophilus quentini]<>hypothetical protein BFQ30_08325 [Haemophilus quentini]
Loki_gp06	47.68	323	157	4	5	326	4	315	2e-93	289	gi|749590397|ref|WP_040216397.1|	hypothetical protein [Haemophilus parahaemolyticus]
Loki_gp06	48.17	328	157	3	5	327	4	323	5e-93	288	gi|953542802|ref|WP_058018021.1|;gi|953172824|gb|KRU93377.1|;gi|953179975|gb|KRV00147.1|	hypothetical protein [Pseudomonas aeruginosa]<>hypothetical protein AN455_19325 [Pseudomonas aeruginosa]<>hypothetical protein AN456_20230 [Pseudomonas aeruginosa]
Loki_gp06	48.62	325	160	3	5	327	4	323	7e-93	288	gi|959925442|ref|WP_058184507.1|;gi|957063687|gb|KSP05546.1|;gi|1012062087|gb|KYO80269.1|	hypothetical protein [Pseudomonas aeruginosa]<>hypothetical protein APB11_11695 [Pseudomonas aeruginosa]<>hypothetical protein LT18_02553 [Pseudomonas aeruginosa]
Loki_gp06	48.31	325	161	3	5	327	4	323	7e-93	288	gi|727760291|ref|WP_033866019.1|;gi|653192074|gb|KEA13211.1|;gi|942270971|gb|KQC55056.1|;gi|942280819|gb|KQC64854.1|;gi|942284335|gb|KQC68328.1|;gi|942293566|gb|KQC77479.1|	hypothetical protein [Pseudomonas aeruginosa]<>hypothetical protein Y905_28125 [Pseudomonas aeruginosa C2159M]<>hypothetical protein APG03_19885 [Pseudomonas aeruginosa]<>hypothetical protein APG04_17610 [Pseudomonas aeruginosa]<>hypothetical protein APG06_07285 [Pseudomonas aeruginosa]<>hypothetical protein APG07_08230 [Pseudomonas aeruginosa]
Loki_gp06	48.31	325	161	3	5	327	4	323	7e-93	288	gi|959950547|ref|WP_058202731.1|;gi|956638608|gb|KSK89408.1|	hypothetical protein [Pseudomonas aeruginosa]<>hypothetical protein APA49_24610 [Pseudomonas aeruginosa]
Loki_gp06	47.37	323	158	4	5	326	4	315	7e-93	288	gi|491984102|ref|WP_005705714.1|;gi|385694629|gb|EIG25218.1|;gi|386908186|gb|EIJ72884.1|	MULTISPECIES: hypothetical protein [Haemophilus]<>hypothetical protein HMPREF1054_1726 [Haemophilus paraphrohaemolyticus HK411]<>hypothetical protein HMPREF1050_0020 [Haemophilus parahaemolyticus HK385]
Loki_gp06	48.31	325	161	3	5	327	4	323	7e-93	288	gi|757700386|ref|WP_042930137.1|;gi|574002593|gb|ETU79440.1|	hypothetical protein [Pseudomonas aeruginosa]<>hypothetical protein Q094_06085 [Pseudomonas aeruginosa PS42]
Loki_gp06	48.31	325	161	3	5	327	4	323	8e-93	288	gi|730360397|ref|WP_033998402.1|	hypothetical protein [Pseudomonas aeruginosa]
Loki_gp06	48.31	325	161	3	5	327	4	323	9e-93	288	gi|730494008|ref|WP_034028796.1|;gi|956130112|gb|KSF89578.1|;gi|956969886|gb|KSO14395.1|;gi|967422040|gb|KTK93149.1|	hypothetical protein [Pseudomonas aeruginosa]<>hypothetical protein AO945_30550 [Pseudomonas aeruginosa]<>hypothetical protein APA91_23470 [Pseudomonas aeruginosa]<>hypothetical protein AL481_24740 [Pseudomonas putida]
Loki_gp06	48.31	325	161	3	5	327	4	323	1e-92	287	gi|730673957|ref|WP_034068212.1|;gi|698159925|emb|CDM51562.1|;gi|955946205|gb|KSE08819.1|;gi|956280316|gb|KSH37063.1|;gi|1072052208|gb|OES49557.1|;gi|1122187354|gb|OKR96104.1|;gi|1129622792|gb|OLQ29056.1|	hypothetical protein [Pseudomonas aeruginosa]<>hypothetical protein PAWS394_2641 [Pseudomonas aeruginosa WS394]<>hypothetical protein AO920_09105 [Pseudomonas aeruginosa]<>hypothetical protein AO963_03825 [Pseudomonas aeruginosa]<>hypothetical protein A7R77_08665 [Pseudomonas aeruginosa]<>hypothetical protein BH602_16400 [Pseudomonas aeruginosa]<>hypothetical protein BIW01_01115 [Pseudomonas aeru…
Loki_gp06	48.31	325	161	3	5	327	4	323	1e-92	287	gi|489194064|ref|WP_003103391.1|;gi|453045022|gb|EME92743.1|;gi|477560123|gb|ENH93584.1|;gi|537449818|gb|ERF07321.1|;gi|582066242|gb|EVT82802.1|;gi|761592475|dbj|BAQ39304.1|;gi|955811461|gb|KSC76202.1|;gi|955947428|gb|KSE10015.1|;gi|956099150|gb|KSF59105.1|;gi|956104337|gb|KSF64196.1|;gi|956136174|gb|KSF95557.1|;gi|956203332|gb|KSG61562.1|;gi|956255440|gb|KSH12637.1|;gi|956662115|gb|KSL12469.1|;g…	hypothetical protein [Pseudomonas aeruginosa]<>hypothetical protein H123_18150 [Pseudomonas aeruginosa PA21_ST175]<>hypothetical protein H734_08992 [Pseudomonas aeruginosa PA45]<>hypothetical protein PA13_1014450 [Pseudomonas aeruginosa HB13]<>hypothetical protein Z046_31780 [Pseudomonas aeruginosa VRFPA09]<>hypothetical bacteriophage protein [Pseudomonas aeruginosa]<>hypothetical protein AO891_2…
Loki_gp06	48.31	325	161	3	5	327	4	323	1e-92	287	gi|553784423|ref|WP_023115884.1|;gi|552381252|gb|ERW39864.1|	hypothetical protein [Pseudomonas aeruginosa]<>hypothetical protein Q033_00920 [Pseudomonas aeruginosa BWHPSA020]
Loki_gp06	48	325	162	3	5	327	4	323	1e-92	287	gi|544848194|ref|WP_021263379.1|;gi|532136328|gb|EQL43662.1|;gi|956574773|gb|KSK26424.1|;gi|956812557|gb|KSM60103.1|;gi|957016348|gb|KSO59819.1|;gi|957144541|gb|KSP84225.1|	hypothetical protein [Pseudomonas aeruginosa]<>hypothetical protein M770_31005 [Pseudomonas aeruginosa VRFPA03]<>hypothetical protein APA27_13830 [Pseudomonas aeruginosa]<>hypothetical protein APA74_19915 [Pseudomonas aeruginosa]<>hypothetical protein APA97_16410 [Pseudomonas aeruginosa]<>hypothetical protein APB20_12695 [Pseudomonas aeruginosa]
Loki_gp06	48.31	325	161	3	5	327	4	323	1e-92	287	gi|950502232|ref|WP_057390648.1|;gi|943820215|gb|KQJ57587.1|	hypothetical protein [Pseudomonas aeruginosa]<>hypothetical protein AN280_06105 [Pseudomonas aeruginosa]
Loki_gp06	48.31	325	161	3	5	327	4	323	2e-92	287	gi|1123514938|ref|WP_074234811.1|	hypothetical protein [Pseudomonas aeruginosa]
Loki_gp06	48.31	325	161	3	5	327	4	323	2e-92	286	gi|959944668|ref|WP_058198824.1|;gi|956846741|gb|KSM93513.1|	hypothetical protein [Pseudomonas aeruginosa]<>hypothetical protein APA82_28110 [Pseudomonas aeruginosa]
Loki_gp06	48.31	325	161	3	5	327	4	323	2e-92	286	gi|550038882|ref|WP_022579910.1|;gi|564838099|gb|ETD49731.1|	hypothetical protein [Pseudomonas aeruginosa]<>hypothetical protein X922_14425 [Pseudomonas aeruginosa VRFPA08]
Loki_gp06	48.31	325	161	3	5	327	4	323	3e-92	286	gi|730232250|ref|WP_033937807.1|;gi|956116280|gb|KSF75982.1|;gi|957410412|gb|KSS45794.1|;gi|1122151917|gb|OKR61881.1|	hypothetical protein [Pseudomonas aeruginosa]<>hypothetical protein AO944_27400 [Pseudomonas aeruginosa]<>hypothetical protein APB59_23685 [Pseudomonas aeruginosa]<>hypothetical protein BH597_15930 [Pseudomonas aeruginosa]
Loki_gp06	48.31	325	161	2	5	327	4	323	3e-92	286	gi|685893817|ref|WP_031634942.1|;gi|647090720|gb|KDR49850.1|	hypothetical protein [Pseudomonas aeruginosa]<>hypothetical protein DQ20_04720 [Pseudomonas aeruginosa]
Loki_gp06	48.31	325	161	3	5	327	4	323	3e-92	286	gi|730416040|ref|WP_034010881.1|	hypothetical protein [Pseudomonas aeruginosa]
Loki_gp06	48	325	162	3	5	327	4	323	3e-92	286	gi|553768927|ref|WP_023101101.1|;gi|552619285|gb|ERY35784.1|;gi|611948135|gb|EZP24041.1|;gi|725803698|gb|KHE57968.1|;gi|944133089|gb|KQK59614.1|;gi|944133958|gb|KQK60481.1|;gi|953203122|gb|KRV22465.1|;gi|956965066|gb|KSO09668.1|;gi|957276231|gb|KSR13842.1|;gi|1062783410|gb|AON71032.1|	hypothetical protein [Pseudomonas aeruginosa]<>hypothetical protein Q067_02420 [Pseudomonas aeruginosa BL13]<>hypothetical protein V550_01942 [Pseudomonas aeruginosa BWH049]<>hypothetical protein D407_0221870 [Pseudomonas aeruginosa]<>hypothetical protein AOX62_11635 [Pseudomonas aeruginosa]<>hypothetical protein AOX61_15420 [Pseudomonas aeruginosa]<>hypothetical protein AN459_03385 [Pseudomonas …
Loki_gp06	48.31	325	161	2	5	327	4	323	3e-92	286	gi|896316566|ref|WP_049289469.1|	hypothetical protein [Pseudomonas aeruginosa]
Loki_gp06	48	325	162	3	5	327	4	323	4e-92	286	gi|498492357|ref|WP_010793134.1|;gi|476652227|gb|EMZ58544.1|;gi|552234352|gb|ERU94482.1|;gi|552258576|gb|ERV18863.1|;gi|552345896|gb|ERW04949.1|;gi|552427205|gb|ERW85305.1|;gi|552656970|gb|ERY71423.1|;gi|552721136|gb|ERZ34539.1|;gi|574004716|gb|ETU81547.1|;gi|611773200|gb|EZN50572.1|;gi|611792593|gb|EZN69749.1|;gi|653264453|gb|KEA43581.1|;gi|956504164|gb|KSJ57032.1|;gi|956612305|gb|KSK63451.1|;gi…	MULTISPECIES: hypothetical protein [Pseudomonas]<>hypothetical protein HMPREF1224_06083 [Pseudomonas sp. P179]<>hypothetical protein Q084_02121 [Pseudomonas aeruginosa M9A.1]<>hypothetical protein Q073_01785 [Pseudomonas aeruginosa BL19]<>hypothetical protein Q037_02324 [Pseudomonas aeruginosa BWHPSA024]<>hypothetical protein Q018_02632 [Pseudomonas aeruginosa BWHPSA005]<>hypothetical protein Q05…
Loki_gp06	48	325	162	3	5	327	4	323	4e-92	286	gi|685944663|ref|WP_031673396.1|;gi|618770347|gb|KAJ07574.1|	hypothetical protein [Pseudomonas aeruginosa]<>hypothetical protein M003_20550 [Pseudomonas aeruginosa IGB83]
Loki_gp06	48	325	162	3	5	327	4	323	6e-92	285	gi|553754631|ref|WP_023087394.1|;gi|552220275|gb|ERU80633.1|;gi|552222281|gb|ERU82537.1|;gi|953216562|gb|KRV35555.1|;gi|956735308|gb|KSL84315.1|;gi|956804842|gb|KSM52540.1|;gi|957170290|gb|KSQ09619.1|;gi|957187402|gb|KSQ26497.1|;gi|967421826|gb|KTK92935.1|;gi|987550548|gb|KXC75872.1|;gi|987565899|gb|KXC91078.1|;gi|987568597|gb|KXC93743.1|;gi|987577133|gb|KXD02193.1|;gi|987586032|gb|KXD11031.1|;gi…	hypothetical protein [Pseudomonas aeruginosa]<>hypothetical protein Q086_02786 [Pseudomonas aeruginosa C23]<>hypothetical protein Q085_02783 [Pseudomonas aeruginosa C20]<>hypothetical protein AN460_01090 [Pseudomonas aeruginosa]<>hypothetical protein APA55_16475 [Pseudomonas aeruginosa]<>hypothetical protein APA66_15530 [Pseudomonas aeruginosa]<>hypothetical protein APB33_31000 [Pseudomonas aerug…
Loki_gp06	48	325	162	3	5	327	4	323	6e-92	285	gi|959899047|ref|WP_058166271.1|;gi|956227060|gb|KSG84866.1|	hypothetical protein [Pseudomonas aeruginosa]<>hypothetical protein AO954_27770 [Pseudomonas aeruginosa]
Loki_gp06	48	325	162	3	5	327	4	323	6e-92	285	gi|553773347|ref|WP_023105203.1|;gi|187939656|gb|ACD38799.1|;gi|187939735|gb|ACD38876.1|;gi|552634879|gb|ERY49405.1|;gi|564833983|gb|ETD45772.1|;gi|611830878|gb|EZO07556.1|;gi|727036886|emb|CEI76867.1|;gi|957401157|gb|KSS36670.1|;gi|1080192161|gb|OFJ88695.1|	MULTISPECIES: hypothetical protein [Pseudomonas]<>hypothetical protein PACL_0551 [Pseudomonas aeruginosa]<>hypothetical protein PACL_0618 [Pseudomonas aeruginosa]<>hypothetical protein Q059_01553 [Pseudomonas aeruginosa BL05]<>hypothetical protein X778_30190 [Pseudomonas aeruginosa VRFPA07]<>hypothetical protein AJ64_02323 [Pseudomonas aeruginosa 3577]<>Uncharacterized protein PAE221_02455 [Pseud…
Loki_gp06	48	325	162	3	5	327	4	323	8e-92	285	gi|1001057075|ref|WP_061196357.1|;gi|987708399|gb|KXE31454.1|;gi|987711351|gb|KXE34366.1|	hypothetical protein [Pseudomonas aeruginosa]<>hypothetical protein AW923_13275 [Pseudomonas aeruginosa]<>hypothetical protein AW922_13235 [Pseudomonas aeruginosa]
Loki_gp06	48	325	162	3	5	327	4	323	9e-92	285	gi|1023037635|ref|WP_063456162.1|;gi|1022532949|gb|ANA72980.1|	hypothetical protein [Pseudomonas aeruginosa]<>hypothetical protein A6R75_23560 [Pseudomonas aeruginosa]
Loki_gp06	48	325	162	3	5	327	4	323	1e-91	285	gi|1121406342|ref|WP_073667936.1|	hypothetical protein [Pseudomonas aeruginosa]
Loki_gp06	48	325	162	3	5	327	4	323	1e-91	285	gi|510945637|ref|WP_016263344.1|;gi|508141143|gb|EOT17995.1|;gi|552509799|gb|ERX66741.1|;gi|552728661|gb|ERZ42001.1|;gi|823573253|gb|KLI79275.1|;gi|953167170|gb|KRU87996.1|;gi|955798026|gb|KSC62967.1|;gi|955818155|gb|KSC82780.1|;gi|1017137884|gb|KZE26326.1|	hypothetical protein [Pseudomonas aeruginosa]<>hypothetical protein L346_01559 [Pseudomonas aeruginosa MSH-10]<>hypothetical protein P999_02843 [Pseudomonas aeruginosa MSH3]<>hypothetical protein Q000_01561 [Pseudomonas aeruginosa MSH10]<>hypothetical protein AAY82_17565 [Pseudomonas aeruginosa]<>hypothetical protein AN453_18520 [Pseudomonas aeruginosa]<>hypothetical protein AO895_21720 [Pseudomo…
Loki_gp06	48	325	162	3	5	327	4	323	2e-91	284	gi|730242985|ref|WP_033946787.1|	hypothetical protein [Pseudomonas aeruginosa]
Loki_gp06	47.69	325	163	3	5	327	4	323	2e-91	284	gi|501022671|ref|WP_012075331.1|;gi|150961556|gb|ABR83581.1|;gi|956193214|gb|KSG51623.1|	hypothetical protein [Pseudomonas aeruginosa]<>conserved hypothetical protein [Pseudomonas aeruginosa PA7]<>hypothetical protein AO955_09700 [Pseudomonas aeruginosa]
Loki_gp06	47.69	325	163	3	5	327	4	323	3e-91	284	gi|817673747|ref|WP_046638886.1|;gi|816093035|gb|KKJ40480.1|	hypothetical protein [Pseudomonas aeruginosa]<>hypothetical protein T649_27930 [Pseudomonas aeruginosa MRSN 321]
Loki_gp06	47.69	325	163	3	5	327	4	323	4e-91	283	gi|1121415448|ref|WP_073672163.1|	hypothetical protein [Pseudomonas aeruginosa]
Loki_gp06	44.17	326	176	3	3	327	1	321	5e-89	278	gi|917070543|ref|WP_051677255.1|	hypothetical protein [Bradyrhizobium sp. URHD0069]
Loki_gp06	44.48	326	173	3	1	326	1	318	5e-87	273	gi|800968117|ref|WP_045994874.1|;gi|798757097|gb|KJZ05580.1|	hypothetical protein [Halomonas sp. S2151]<>hypothetical protein TW86_20810 [Halomonas sp. S2151]
Loki_gp06	43.12	327	178	3	1	326	1	320	2e-86	271	gi|1036466728|ref|WP_064702667.1|;gi|1094426153|emb|SEN65122.1|	hypothetical protein [Halomonas caseinilytica]<>hypothetical protein SAMN04487952_12313 [Halomonas caseinilytica]
Loki_gp06	46.13	323	166	3	5	327	4	318	2e-86	271	gi|1094421310|emb|SET28327.1|	hypothetical protein SAMN02583745_01889 [Thorsellia anophelis DSM 18579]
Loki_gp06	44.17	326	166	4	5	325	4	318	2e-84	266	gi|644553193|ref|WP_025331419.1|;gi|597814417|gb|AHN29247.1|	hypothetical protein [Snodgrassella alvi]<>hypothetical protein SALWKB2_1865 [Snodgrassella alvi wkB2]
Loki_gp06	44.24	321	167	3	5	324	4	313	4e-81	258	gi|817923689|gb|AKG19251.1|	hypothetical protein AAX09_07545 [Moraxella bovoculi]
Loki_gp06	43.83	324	164	4	5	324	4	313	4e-78	250	gi|1022943684|ref|WP_063454196.1|;gi|1022643926|gb|KZR94073.1|	hypothetical protein [Moraxella catarrhalis]<>hypothetical protein A4U55_07430 [Moraxella catarrhalis]
Loki_gp06	43.52	324	165	4	5	324	4	313	7e-78	249	gi|489754175|ref|WP_003658166.1|;gi|295920858|gb|ADG61209.1|;gi|326565561|gb|EGE15726.1|;gi|326573362|gb|EGE23330.1|;gi|326575741|gb|EGE25664.1|;gi|672768275|gb|AIK00156.1|;gi|696615201|gb|AIT43364.1|;gi|823080885|gb|AKI28252.1|	hypothetical protein [Moraxella catarrhalis]<>hypothetical protein MCR_0944 [Moraxella catarrhalis BBH18]<>hypothetical protein E9K_02786 [Moraxella catarrhalis 103P14B1]<>hypothetical protein E9Y_08916 [Moraxella catarrhalis 101P30B1]<>hypothetical protein E9W_02195 [Moraxella catarrhalis CO72]<>hypothetical protein DR90_938 [Moraxella catarrhalis]<>hypothetical protein MC25239_00943 [Moraxella …
Loki_gp06	40.31	325	184	5	1	324	1	316	7e-59	201	gi|544653283|ref|WP_021087169.1|;gi|543211284|gb|ERJ30342.1|	hypothetical protein [Campylobacter concisus]<>hypothetical protein UNSWCS_1932 [Campylobacter concisus UNSWCS]
Loki_gp06	37.85	325	192	5	1	324	1	316	1e-58	200	gi|492094551|ref|WP_005746988.1|;gi|330989584|gb|EGH87687.1|;gi|821148173|gb|KKY52733.1|;gi|928335868|gb|KPB98123.1|;gi|928358986|gb|KPC20402.1|	hypothetical protein [Pseudomonas amygdali]<>hypothetical protein PLA107_31489 [Pseudomonas amygdali pv. lachrymans str. M301315]<>hypothetical protein AAY85_26805 [Pseudomonas amygdali pv. lachrymans]<>Uncharacterized protein AC501_4530 [Pseudomonas amygdali pv. lachrymans]<>Uncharacterized protein AC499_2109 [Pseudomonas amygdali pv. lachrymans]
Loki_gp06	36.81	326	198	4	1	323	1	321	2e-58	199	gi|1012007722|ref|WP_062798352.1|;gi|1010931436|gb|AMR77674.1|	hypothetical protein [Cupriavidus nantongensis]<>hypothetical protein A2G96_07965 [Cupriavidus nantongensis]
Loki_gp06	38.27	324	190	5	1	323	1	315	3e-58	199	gi|704420548|ref|WP_033470339.1|;gi|633573014|gb|KDD44810.1|	hypothetical protein [Bordetella bronchiseptica]<>hypothetical protein L532_2322 [Bordetella bronchiseptica OSU095]
Loki_gp06	52.85	193	78	3	135	326	6	186	3e-58	194	gi|1009039977|gb|KYL06388.1|	hypothetical protein AC569_12720, partial [Mannheimia haemolytica]
Loki_gp06	37.54	325	193	5	1	324	1	316	5e-58	199	gi|1026752906|gb|OAE15534.1|	hypothetical protein A2T76_17880 [Pseudomonas brenneri]
Loki_gp06	37.96	324	191	5	1	323	1	315	6e-58	198	gi|704436418|ref|WP_033475662.1|	hypothetical protein [Bordetella pertussis]
Loki_gp06	38.15	325	191	5	1	324	1	316	6e-58	198	gi|802173997|ref|WP_046047653.1|;gi|799196635|gb|KJZ41580.1|	hypothetical protein [Pseudomonas fluorescens]<>hypothetical protein VC34_17460 [Pseudomonas fluorescens]
Loki_gp06	37.96	324	191	5	1	323	11	325	8e-58	198	gi|565736522|gb|ETH45232.1|	hypothetical protein L549_0404 [Bordetella pertussis H939]
Loki_gp06	38.15	325	191	5	1	324	1	316	1e-57	198	gi|515081580|ref|WP_016711278.1|	MULTISPECIES: hypothetical protein [Pseudomonas putida group]
Loki_gp06	37.96	324	191	5	1	323	1	315	1e-57	197	gi|489910013|ref|WP_003813427.1|;gi|410566563|emb|CCN24126.1|	hypothetical protein [Bordetella bronchiseptica]<>phage-related conserved hypothetical protein [Bordetella bronchiseptica 1289]
Loki_gp06	37.96	324	191	5	1	323	1	315	1e-57	197	gi|504852568|ref|WP_015039670.1|;gi|410472752|ref|YP_006896033.1|;gi|408442862|emb|CCJ49429.1|;gi|633410726|gb|KDB96178.1|;gi|633414032|gb|KDB99264.1|;gi|633517401|gb|KDC90916.1|;gi|633539707|gb|KDD12606.1|;gi|633564769|gb|KDD36855.1|;gi|633965304|gb|KDD83888.1|;gi|673488081|gb|KFJ54533.1|	MULTISPECIES: hypothetical protein [Bordetella]<>hypothetical protein BN117_2096 [Bordetella parapertussis Bpp5]<>phage-related conserved hypothetical protein [Bordetella parapertussis Bpp5]<>hypothetical protein AZ18_2373 [Bordetella bronchiseptica D993]<>hypothetical protein AZ23_2307 [Bordetella bronchiseptica E010]<>hypothetical protein L517_2214 [Bordetella bronchiseptica MBORD670]<>hypothet…
Loki_gp06	37.54	325	193	5	1	324	1	316	1e-57	197	gi|696526519|ref|WP_033061761.1|;gi|633675716|gb|KDD65316.1|	hypothetical protein [Pseudomonas mandelii]<>hypothetical protein V466_29045 [Pseudomonas mandelii PD30]
Loki_gp06	37.23	325	194	5	1	324	1	316	2e-57	197	gi|940421425|ref|WP_055010104.1|;gi|940031861|gb|KPW56680.1|	hypothetical protein [Pseudomonas caricapapayae]<>Uncharacterized protein ALO80_00876 [Pseudomonas caricapapayae]
Loki_gp06	37.96	324	191	5	1	323	1	315	2e-57	197	gi|490702877|ref|WP_004566292.1|;gi|412337360|ref|YP_006966115.1|;gi|33575638|emb|CAE32716.1|;gi|33576914|emb|CAE33994.1|;gi|408767194|emb|CCJ51940.1|;gi|410569117|emb|CCN17202.1|;gi|613408709|dbj|BAO70058.1|;gi|620715776|gb|KAK74724.1|;gi|627879750|gb|KCV36300.1|;gi|627896083|gb|KCV51202.1|;gi|627903510|gb|KCV58155.1|;gi|633399217|gb|KDB85165.1|;gi|633404302|gb|KDB90078.1|;gi|633434851|gb|KDC189…	hypothetical protein [Bordetella bronchiseptica]<>hypothetical protein BN112_0022 [Bordetella bronchiseptica 253]<>phage-related conserved hypothetical protein [Bordetella bronchiseptica RB50]<>phage-related conserved hypothetical protein [Bordetella bronchiseptica RB50]<>phage-related conserved hypothetical protein [Bordetella bronchiseptica 253]<>phage-related conserved hypothetical protein [Bo…
Loki_gp06	38.34	326	189	7	1	324	1	316	2e-57	197	gi|506310511|ref|WP_015830286.1|;gi|253986014|gb|ACT50871.1|	hypothetical protein [Methylovorus glucosotrophus]<>conserved hypothetical protein [Methylovorus glucosetrophus SIP3-4]
Loki_gp06	37.96	324	191	5	1	323	1	315	2e-57	197	gi|704396273|ref|WP_033460656.1|;gi|633971187|gb|KDD89672.1|	hypothetical protein [Bordetella bronchiseptica]<>hypothetical protein L519_2173 [Bordetella bronchiseptica MBORD678]
Loki_gp06	37.96	324	191	5	1	323	1	315	4e-57	196	gi|704381220|ref|WP_033454802.1|;gi|633548627|gb|KDD21270.1|	hypothetical protein [Bordetella bronchiseptica]<>hypothetical protein L525_3514 [Bordetella bronchiseptica MBORD782]
Loki_gp06	37.23	325	194	5	1	324	1	316	8e-57	196	gi|929529283|ref|WP_054070248.1|;gi|928333352|gb|KPB95745.1|	hypothetical protein [Pseudomonas syringae group genomosp. 3]<>Uncharacterized protein AC503_3069 [Pseudomonas syringae pv. maculicola]
Loki_gp06	37.04	324	194	5	1	323	1	315	2e-56	194	gi|499857416|ref|WP_011538150.1|;gi|99036926|gb|ABF63538.1|	hypothetical protein [Ruegeria sp. TM1040]<>phage-related conserved hypothetical protein [Ruegeria sp. TM1040]
Loki_gp06	37.85	325	192	5	1	324	1	316	2e-56	194	gi|518557002|ref|WP_019727209.1|;gi|937559979|gb|ALI58908.1|;gi|956502128|gb|KSJ55015.1|;gi|956761434|gb|KSM09966.1|;gi|1084368305|gb|AOX32993.1|;gi|1100618374|gb|APB57077.1|	hypothetical protein [Pseudomonas aeruginosa]<>hypothetical protein CCBH4851_00204 [Pseudomonas aeruginosa]<>hypothetical protein APA05_05190 [Pseudomonas aeruginosa]<>hypothetical protein APA61_29430 [Pseudomonas aeruginosa]<>hypothetical protein PA8281_05732 [Pseudomonas aeruginosa]<>hypothetical protein PA7790_05794 [Pseudomonas aeruginosa]
Loki_gp06	36.92	325	195	5	1	324	1	316	4e-56	194	gi|654782675|ref|WP_028236781.1|	hypothetical protein [Pseudomonas brassicacearum]
Loki_gp06	36.62	325	196	5	1	324	1	316	5e-56	193	gi|639536331|ref|WP_024685098.1|	hypothetical protein [Pseudomonas syringae]
Loki_gp06	38.34	326	189	6	1	324	1	316	7e-56	193	gi|495351036|ref|WP_008075761.1|;gi|398231253|gb|EJN17244.1|	hypothetical protein [Pseudomonas sp. GM79]<>hypothetical protein PMI36_05578 [Pseudomonas sp. GM79]
Loki_gp07	100	112	0	0	1	112	1	112	2e-75	227	gi|949419298|emb|CUS06468.1|	hypothetical protein [unclassified Siphoviridae]
Loki_gp07	52.21	113	45	4	5	112	4	112	4e-29	110	gi|589892175|ref|YP_009008540.1|;gi|583926729|gb|AHI60035.1|	hypothetical protein IME_AB3_36 [Acinetobacter phage IME_AB3]<>hypothetical protein IME_AB3_36 [Acinetobacter phage IME_AB3]
Loki_gp07	37.89	95	49	2	1	92	1	88	2e-08	58.2	gi|399528726|ref|YP_006560763.1|;gi|371767562|gb|AEX56096.1|	hypothetical protein KL1_00012 [Burkholderia phage KL1]<>hypothetical protein KL1_00012 [Burkholderia phage KL1]
Loki_gp07	40	95	46	3	1	92	1	87	5e-08	57	gi|910307496|gb|AKU43195.1|	hypothetical protein RCSPARTAN_12 [Rhodobacter phage RcSpartan]
Loki_gp07	42.7	89	42	5	1	85	1	84	1e-06	53.1	gi|658311469|ref|YP_009044346.1|;gi|656178011|emb|CDN96772.1|	hypothetical protein [Pseudomonas phage vB_PaeS_SCH_Ab26]<>hypothetical protein [Pseudomonas phage vB_PaeS_SCH_Ab26]
Loki_gp07	40.79	76	40	3	1	72	1	75	3e-06	52	gi|148912839|ref|YP_001293418.1|;gi|388542671|ref|YP_006299876.1|;gi|378407739|gb|AFB83300.1|;gi|701904475|gb|AIW01676.1|;gi|823081463|gb|AKI28818.1|	hypothetical protein ORF011 [Pseudomonas phage 73]<>hypothetical protein KAK25_00012 [Pseudomonas phage vB_Pae-Kakheti25]<>hypothetical protein KAK25_00012 [Pseudomonas phage vB_Pae-Kakheti25]<>hypothetical protein vB_Pae_PS9N_00025 [Pseudomonas phage vB_Pae_PS9N]<>hypothetical protein [Stenotrophomonas phage vB_SmaS-DLP_1]
Loki_gp07	40.79	76	40	3	1	72	1	75	3e-06	52	gi|971766255|ref|YP_009219169.1|;gi|823081404|gb|AKI28760.1|	hypothetical protein [Stenotrophomonas phage vB_SmaS-DLP_2]<>hypothetical protein [Stenotrophomonas phage vB_SmaS-DLP_2]
Loki_gp07	34.43	122	61	7	5	111	6	123	2e-05	50.4	gi|1088494523|gb|OHD25445.1|	hypothetical protein A2Y38_12875 [Spirochaetes bacterium GWB1_59_5]
Loki_gp07	34.74	95	52	2	1	92	8	95	6e-05	48.9	gi|971751692|ref|YP_009205607.1|;gi|936761530|gb|ALH23589.1|	hypothetical protein PaMx42_12 [Pseudomonas phage PaMx42]<>hypothetical protein PaMx42_12 [Pseudomonas phage PaMx42]
Loki_gp07	46.15	52	27	1	52	103	509	559	5	36.6	gi|1056652330|ref|WP_068080458.1|	peptidase M16 [Novosphingobium rosa]
Loki_gp07	36.21	58	26	1	63	109	19	76	5	34.7	gi|935410709|ref|WP_054392323.1|;gi|928534572|gb|KPD26854.1|	hypothetical protein [Thermus scotoductus]<>hypothetical protein AN926_09855 [Thermus scotoductus]
Loki_gp08	100	162	0	0	1	162	1	162	6e-114	328	gi|949419299|emb|CUS06469.1|	putative head-tail joining protein [unclassified Siphoviridae]
Loki_gp08	75.93	162	39	0	1	162	1	162	5e-87	260	gi|589892174|ref|YP_009008539.1|;gi|583926728|gb|AHI60034.1|	putative structural protein [Acinetobacter phage IME_AB3]<>putative structural protein [Acinetobacter phage IME_AB3]
Loki_gp08	45.93	172	83	1	1	162	1	172	7e-44	151	gi|399528728|ref|YP_006560765.1|;gi|371767564|gb|AEX56098.1|	hypothetical protein KL1_00014 [Burkholderia phage KL1]<>hypothetical protein KL1_00014 [Burkholderia phage KL1]
Loki_gp08	45.93	172	83	1	1	162	1	172	1e-43	150	gi|971751690|ref|YP_009205609.1|;gi|936761528|gb|ALH23587.1|	virion structural protein [Pseudomonas phage PaMx42]<>virion structural protein [Pseudomonas phage PaMx42]
Loki_gp08	44.77	172	85	1	1	162	1	172	2e-42	147	gi|658311471|ref|YP_009044348.1|;gi|656178013|emb|CDN96774.1|	virion protein [Pseudomonas phage vB_PaeS_SCH_Ab26]<>virion protein [Pseudomonas phage vB_PaeS_SCH_Ab26]
Loki_gp08	44.77	172	85	1	1	162	1	172	3e-41	145	gi|148912841|ref|YP_001293420.1|;gi|701904477|gb|AIW01678.1|	hypothetical protein ORF013 [Pseudomonas phage 73]<>hypothetical protein vB_Pae_PS9N_00027 [Pseudomonas phage vB_Pae_PS9N]
Loki_gp08	43.6	172	85	2	1	162	1	170	3e-41	144	gi|985760158|ref|YP_009225679.1|;gi|910307315|gb|AKU43031.1|	hypothetical protein RCTITAN_14 [Rhodobacter phage RcTitan]<>hypothetical protein RCTITAN_14 [Rhodobacter phage RcTitan]
Loki_gp08	44.77	172	85	1	1	162	1	172	4e-41	144	gi|388542673|ref|YP_006299878.1|;gi|971766247|ref|YP_009219171.1|;gi|378407741|gb|AFB83302.1|;gi|823081396|gb|AKI28752.1|	virion protein [Pseudomonas phage vB_Pae-Kakheti25]<>hypothetical protein [Stenotrophomonas phage vB_SmaS-DLP_2]<>virion protein [Pseudomonas phage vB_Pae-Kakheti25]<>hypothetical protein [Stenotrophomonas phage vB_SmaS-DLP_2]
Loki_gp08	43.6	172	87	1	1	162	1	172	4e-41	144	gi|823081455|gb|AKI28810.1|	hypothetical protein [Stenotrophomonas phage vB_SmaS-DLP_1]
Loki_gp08	43.6	172	85	2	1	162	1	170	9e-41	143	gi|910307498|gb|AKU43197.1|	hypothetical protein RCSPARTAN_14 [Rhodobacter phage RcSpartan]
Loki_gp08	38.04	163	93	4	3	162	1	158	3e-22	96.3	gi|764162035|ref|YP_009126431.1|;gi|746947753|gb|AJD83165.1|	hypothetical protein [Paracoccus phage vB_PmaS_IMEP1]<>hypothetical protein [Paracoccus phage vB_PmaS_IMEP1]
Loki_gp08	36.99	173	89	5	4	161	1	168	1e-19	89.7	gi|1015669857|gb|AMW36130.1|	virion protein [Xanthomonas phage XAJ2]
Loki_gp08	37.28	169	89	6	3	159	1	164	7e-19	87.8	gi|509420196|gb|AGN30439.1|	hypothetical protein SXAG_00158 [Synechococcus phage S-CBS4]
Loki_gp08	33.77	154	91	2	1	144	1	153	5e-15	77.8	gi|849060479|ref|YP_009151952.1|;gi|701946779|gb|AIW03871.1|	hypothetical protein CPT_Seurat8 [Escherichia phage Seurat]<>hypothetical protein CPT_Seurat8 [Escherichia phage Seurat]
Loki_gp08	38.13	139	79	5	3	139	1	134	1e-14	75.9	gi|503868122|ref|WP_014102116.1|;gi|347589851|gb|AEP08893.1|	hypothetical protein [Micavibrio aeruginosavorus]<>hypothetical protein MICA_556 [Micavibrio aeruginosavorus ARL-13]
Loki_gp08	35.68	185	94	9	1	162	1	183	8e-14	74.7	gi|971747948|ref|YP_009201746.1|;gi|746947428|gb|AJD82845.1|	hypothetical protein JWAP_00012 [Achromobacter phage 83-24]<>hypothetical protein JWAP_00012 [Achromobacter phage 83-24]
Loki_gp08	32	175	83	7	5	149	3	171	4e-13	73.2	gi|491170828|ref|WP_005029195.1|;gi|316921935|gb|EFV43205.1|	hypothetical protein [Bilophila wadsworthia]<>hypothetical protein HMPREF0179_02946 [Bilophila wadsworthia 3_1_6]
Loki_gp08	34.38	160	85	4	5	147	3	159	4e-13	72.8	gi|146329921|ref|YP_001210229.1|;gi|145321097|gb|ABP63580.1|	BcepGomrgp09 [Burkholderia phage BcepGomr]<>BcepGomrgp09 [Burkholderia phage BcepGomr]
Loki_gp08	36.21	116	73	1	3	118	1	115	9e-13	70.5	gi|498101461|ref|WP_010415617.1|	hypothetical protein [Citromicrobium sp. JLT1363]
Loki_gp08	30.82	159	91	6	14	161	9	159	4e-12	69.7	gi|640694692|ref|WP_025118797.1|	MULTISPECIES: hypothetical protein [Serratia]
Loki_gp08	30.82	159	91	6	14	161	9	159	2e-11	68.2	gi|1122347362|ref|WP_074032354.1|;gi|1120672174|gb|OKP17057.1|	hypothetical protein [Serratia fonticola]<>hypothetical protein BSQ40_28805 [Serratia fonticola]
Loki_gp08	34.35	131	69	4	5	125	4	127	7e-11	66.2	gi|775449512|dbj|BAQ84214.1|	virion protein [uncultured Mediterranean phage uvMED]
Loki_gp08	30.18	169	98	8	1	154	1	164	2e-10	65.5	gi|640885130|ref|YP_009032380.1|;gi|601131742|gb|AHN84573.1|	hypothetical protein 9g_00057 [Enterobacteria phage 9g]<>hypothetical protein 9g_00057 [Enterobacteria phage 9g]
Loki_gp08	41.38	87	49	2	3	88	1	86	2e-10	65.1	gi|1024294835|ref|WP_063492616.1|	hypothetical protein [Bordetella trematum]
Loki_gp08	30.18	169	98	8	1	154	1	164	2e-10	65.1	gi|971763977|ref|YP_009216947.1|;gi|797192518|gb|AKA60962.1|	hypothetical protein [Enterobacteria phage JenP2]<>hypothetical protein [Enterobacteria phage JenP2]
Loki_gp08	32.93	167	90	7	1	147	1	165	3e-10	65.5	gi|971741689|ref|YP_009196199.1|;gi|746947362|gb|AJD82780.1|	hypothetical protein JWX_00014 [Achromobacter phage JWX]<>hypothetical protein JWX_00014 [Achromobacter phage JWX]
Loki_gp08	31.21	141	82	5	14	143	9	145	3e-10	65.1	gi|1129593232|ref|WP_075539724.1|;gi|1045646932|gb|OCG66600.1|	hypothetical protein [Gilliamella apicola]<>hypothetical protein A9G41_12340 [Gilliamella apicola]
Loki_gp08	29.59	169	99	8	1	154	1	164	3e-10	64.7	gi|971766382|ref|YP_009219289.1|;gi|797192617|gb|AKA61049.1|	hypothetical protein [Enterobacteria phage JenK1]<>hypothetical protein [Enterobacteria phage JenK1]
Loki_gp08	29.94	157	95	2	4	145	1	157	4e-10	64.7	gi|712916155|ref|YP_009103915.1|;gi|587758092|gb|AHK11819.1|	head-tail connector [Shewanella sp. phage 3/49]<>head-tail connector [Shewanella sp. phage 3/49]
Loki_gp08	29.24	171	100	6	3	161	1	162	4e-10	64.7	gi|1094985313|emb|SEL12141.1|	hypothetical protein SAMN05216359_105273 [Roseateles sp. YR242]
Loki_gp08	41.86	86	48	2	4	88	1	85	4e-10	64.3	gi|1016169583|emb|SAI72220.1|;gi|1017251301|emb|SAI43017.1|	Uncharacterised protein [Bordetella trematum]<>Uncharacterised protein [Bordetella trematum]
Loki_gp08	30.28	142	84	5	17	147	12	149	7e-10	63.9	gi|740855782|ref|WP_038641034.1|;gi|619738316|gb|AHY13555.1|	hypothetical protein [Citrobacter freundii]<>hypothetical protein CFNIH1_19085 [Citrobacter freundii CFNIH1]
Loki_gp08	30.28	142	84	5	17	147	12	149	1e-09	63.2	gi|1028183301|ref|WP_063929361.1|;gi|1017686076|emb|SAF60033.1|;gi|1018150088|emb|SAG51173.1|;gi|1103192049|gb|OIZ38203.1|	MULTISPECIES: hypothetical protein [Enterobacteriaceae]<>Uncharacterised protein [Enterobacter cloacae]<>Uncharacterised protein [Enterobacter cloacae]<>hypothetical protein BEH73_25690 [Citrobacter freundii]
Loki_gp08	32.12	137	77	6	1	125	1	133	1e-09	63.2	gi|971767076|ref|YP_009219979.1|;gi|797192419|gb|AKA60875.1|	hypothetical protein [Enterobacteria phage JenP1]<>hypothetical protein [Enterobacteria phage JenP1]
Loki_gp08	30.28	142	84	5	17	147	12	149	2e-09	63.2	gi|755043252|ref|WP_042395746.1|;gi|689826911|dbj|GAL60382.1|	hypothetical protein [Escherichia vulneris]<>hypothetical protein EV102420_37_00210 [Escherichia vulneris NBRC 102420]
Loki_gp08	31.51	146	84	6	17	151	12	152	2e-09	62.8	gi|736915098|ref|WP_034913022.1|	hypothetical protein [Erwinia sp. 9145]
Loki_gp08	30.28	142	84	5	17	147	12	149	2e-09	62.8	gi|743511284|ref|WP_039028854.1|	hypothetical protein [Leclercia adecarboxylata]
Loki_gp08	31.69	142	82	5	17	147	12	149	3e-09	62	gi|556478657|ref|WP_023330237.1|;gi|555188859|gb|ESN31364.1|;gi|578289421|gb|EUM49161.1|	MULTISPECIES: hypothetical protein [Enterobacter cloacae complex]<>hypothetical protein L371_00041 [Enterobacter sp. MGH 25]<>hypothetical protein L383_01140 [Enterobacter sp. MGH 37]
Loki_gp08	29.58	142	85	5	17	147	12	149	6e-09	61.2	gi|507085943|ref|WP_016156684.1|;gi|500566636|gb|EOQ30393.1|	hypothetical protein [Citrobacter sp. KTE32]<>hypothetical protein WEU_02277 [Citrobacter sp. KTE32]
Loki_gp08	30.28	142	84	5	17	147	12	149	8e-09	61.2	gi|647322278|ref|WP_025759414.1|	hypothetical protein [Enterobacter cloacae]
Loki_gp08	29.58	142	85	5	17	147	12	149	8e-09	61.2	gi|835245432|ref|WP_047416523.1|;gi|725519151|gb|KHE11530.1|;gi|1045507547|gb|OCF79430.1|	MULTISPECIES: hypothetical protein [Citrobacter freundii complex]<>hypothetical protein LH87_17195 [Citrobacter braakii]<>hypothetical protein AS299_14975 [Citrobacter freundii]
Loki_gp08	31.16	138	80	5	17	143	12	145	9e-09	60.8	gi|881079526|ref|WP_048795443.1|	MULTISPECIES: hypothetical protein [Serratia]
Loki_gp08	29.58	142	85	5	17	147	12	149	1e-08	60.8	gi|1120952225|ref|WP_073464661.1|;gi|1114195005|gb|APK63036.1|;gi|1114199070|gb|APK67100.1|	hypothetical protein [Escherichia coli]<>hypothetical protein RG47_16575 [Escherichia coli]<>hypothetical protein RG48_14010 [Escherichia coli]
Loki_gp08	30.61	147	77	7	17	149	12	147	2e-08	60.1	gi|737930791|ref|WP_035895708.1|;gi|668987344|gb|KFC99702.1|	hypothetical protein [Kluyvera ascorbata]<>phage protein [Kluyvera ascorbata ATCC 33433]
Loki_gp08	29.86	144	84	5	17	150	12	148	2e-08	60.1	gi|1046184483|ref|WP_065579434.1|;gi|1045625005|gb|OCG46003.1|	hypothetical protein [Gilliamella apicola]<>hypothetical protein A9G28_11020 [Gilliamella apicola]
Loki_gp08	30.28	142	84	5	17	147	12	149	2e-08	59.7	gi|981382862|ref|WP_059596210.1|;gi|978040630|gb|KVJ46403.1|	hypothetical protein [Enterobacter hormaechei]<>hypothetical protein AWS30_17780 [Enterobacter hormaechei subsp. oharae]
Loki_gp08	31.03	145	79	6	17	147	12	149	2e-08	59.7	gi|1103736229|ref|WP_071692436.1|;gi|1103055997|gb|OIY04756.1|	hypothetical protein [Citrobacter freundii]<>hypothetical protein BED42_07885 [Citrobacter freundii]
Loki_gp08	29.58	142	85	5	17	147	12	149	3e-08	59.7	gi|1028098979|ref|WP_063855446.1|;gi|1017298808|emb|CZZ20837.1|;gi|1017321337|emb|CZZ68147.1|;gi|1017838960|emb|SAF90893.1|;gi|1017844124|emb|CZZ53678.1|	hypothetical protein [Enterobacter cloacae]<>Uncharacterised protein [Enterobacter cloacae]<>Uncharacterised protein [Enterobacter cloacae]<>Uncharacterised protein [Enterobacter cloacae]<>Uncharacterised protein [Enterobacter cloacae]
Loki_gp08	31.51	146	75	7	17	148	12	146	3e-08	59.7	gi|696368631|ref|WP_032943643.1|;gi|575563491|gb|ETX63176.1|;gi|1103058594|gb|OIY07314.1|;gi|1103204417|gb|OIZ49911.1|	hypothetical protein [Citrobacter freundii]<>hypothetical protein P835_02292 [Citrobacter freundii UCI 32]<>hypothetical protein BED43_24530 [Citrobacter freundii]<>hypothetical protein BEH74_24155 [Citrobacter freundii]
Loki_gp08	30.28	142	80	6	17	147	12	145	3e-08	59.7	gi|1046171440|ref|WP_065568169.1|;gi|1045602041|gb|OCG24182.1|;gi|1045608809|gb|OCG30607.1|	hypothetical protein [Gilliamella apicola]<>hypothetical protein A9G46_08935 [Gilliamella apicola]<>hypothetical protein A9G45_02675 [Gilliamella apicola]
Loki_gp08	28.87	142	86	5	17	147	12	149	3e-08	59.7	gi|779972832|ref|WP_045418831.1|	hypothetical protein [Enterobacter cloacae complex sp. 35009]
Loki_gp08	33.08	133	75	6	17	143	12	136	3e-08	59.3	gi|1094421308|emb|SET28278.1|	hypothetical protein SAMN02583745_01887 [Thorsellia anophelis DSM 18579]
Loki_gp08	30.28	142	84	5	17	147	12	149	4e-08	59.3	gi|822027610|ref|WP_046887206.1|;gi|821206894|gb|KKY79247.1|	hypothetical protein [Enterobacter cloacae]<>hypothetical protein OA46_21890 [Enterobacter cloacae]
Loki_gp08	30.67	150	90	4	3	139	1	149	4e-08	59.3	gi|918413400|ref|WP_052464576.1|;gi|743969532|dbj|BAQ18316.1|	hypothetical protein [Methyloceanibacter caenitepidi]<>phage protein [Methyloceanibacter caenitepidi]
Loki_gp08	28.87	142	86	5	17	147	12	149	6e-08	58.5	gi|895957813|ref|WP_049040893.1|	hypothetical protein [Citrobacter braakii]
Loki_gp08	28.87	142	86	5	17	147	12	149	7e-08	58.5	gi|1027677116|ref|WP_063616269.1|;gi|1018163021|emb|SAA62318.1|	hypothetical protein [Enterobacter cloacae]<>Uncharacterised protein [Enterobacter cloacae]
Loki_gp08	30.28	142	84	5	17	147	12	149	7e-08	58.5	gi|749016583|ref|WP_040075322.1|;gi|685438465|gb|KGA99295.1|	hypothetical protein [Enterobacteriaceae bacterium ATCC 29904]<>putative phage protein [Enterobacteriaceae bacterium ATCC 29904]
Loki_gp08	29.58	142	85	5	17	147	12	149	8e-08	58.5	gi|555562434|ref|WP_023277170.1|;gi|554700333|gb|ESK05854.1|;gi|771381404|gb|KJP13786.1|;gi|1017917666|emb|SAG43552.1|	MULTISPECIES: hypothetical protein [Enterobacteriaceae]<>hypothetical protein G723_03100 [Escherichia coli HVH 50 (4-2593475)]<>hypothetical protein SR74_22325 [Enterobacter asburiae]<>Uncharacterised protein [Enterobacter cloacae]
Loki_gp08	31.03	145	79	6	17	147	12	149	8e-08	58.5	gi|1103704124|ref|WP_071667503.1|;gi|1103060566|gb|OIY09236.1|	hypothetical protein [Citrobacter freundii]<>hypothetical protein BED44_22910 [Citrobacter freundii]
Loki_gp08	30.28	142	84	5	17	147	12	149	8e-08	58.5	gi|1051745047|ref|WP_065944820.1|;gi|1050864850|gb|ANZ87047.1|	hypothetical protein [Citrobacter freundii]<>hypothetical protein CfB38_2126 [Citrobacter freundii]
Loki_gp08	28.87	142	86	5	17	147	12	149	9e-08	58.2	gi|510926387|ref|WP_016247120.1|;gi|508451493|gb|EOW21301.1|;gi|937670364|gb|KPO04264.1|;gi|937674119|gb|KPO07901.1|;gi|937675383|gb|KPO09127.1|;gi|937678529|gb|KPO12169.1|	hypothetical protein [Escherichia coli]<>hypothetical protein A1WU_03052 [Escherichia coli KTE108]<>hypothetical protein ACU57_25450 [Escherichia coli]<>hypothetical protein ACU57_19685 [Escherichia coli]<>hypothetical protein ACU57_18300 [Escherichia coli]<>hypothetical protein ACU57_12265 [Escherichia coli]
Loki_gp08	30.5	141	81	5	17	147	12	145	1e-07	58.2	gi|1046483165|ref|WP_065652884.1|;gi|1045658143|gb|OCG77383.1|	hypothetical protein [Gilliamella apicola]<>hypothetical protein A9G42_05620 [Gilliamella apicola]
Loki_gp08	28.87	142	86	5	17	147	12	149	1e-07	58.2	gi|782718638|ref|WP_045618051.1|;gi|770969562|gb|KJL64739.1|	hypothetical protein [Enterobacter hormaechei]<>hypothetical protein SS38_23720 [Enterobacter hormaechei subsp. oharae]
Loki_gp08	28.87	142	86	5	17	147	12	149	1e-07	58.2	gi|695656569|ref|WP_032621536.1|;gi|636479518|gb|KDM55895.1|;gi|978006388|gb|KVJ12774.1|;gi|1015391967|emb|CZY37747.1|;gi|1069049063|gb|OEH12728.1|	MULTISPECIES: hypothetical protein [Enterobacteriaceae]<>hypothetical protein AF34_00793 [Lelliottia amnigena CHS 78]<>hypothetical protein AWS40_20090 [Enterobacter asburiae]<>Uncharacterised protein [Enterobacter cloacae]<>hypothetical protein AN696_0220310 [Enterobacter asburiae]
Loki_gp08	28.87	142	86	5	17	147	12	149	1e-07	57.8	gi|654545864|ref|WP_028013570.1|	hypothetical protein [Enterobacter cloacae]
Loki_gp08	28.87	142	86	5	17	147	12	149	1e-07	57.8	gi|970314742|ref|WP_058683387.1|;gi|967109347|gb|KTH89475.1|	hypothetical protein [Enterobacter cloacae]<>hypothetical protein ASV14_22985 [Enterobacter cloacae subsp. cloacae]
Loki_gp08	33.57	143	77	6	17	147	12	148	1e-07	57.8	gi|1119629775|ref|WP_072551135.1|	hypothetical protein [Candidatus Fukatsuia symbiotica]
Loki_gp08	29.58	142	85	5	17	147	12	149	2e-07	57.4	gi|970261825|ref|WP_058646339.1|;gi|967216092|gb|KTI92372.1|;gi|1017477569|emb|SAB80640.1|	MULTISPECIES: hypothetical protein [Enterobacter cloacae complex]<>hypothetical protein ASU95_20410 [Enterobacter hormaechei]<>Uncharacterised protein [Enterobacter cloacae]
Loki_gp08	30.77	156	87	9	17	161	12	157	2e-07	57.4	gi|1097307052|emb|SFU43761.1|	hypothetical protein SAMN05421784_1077 [Xenorhabdus koppenhoeferi]
Loki_gp08	28.87	142	86	5	17	147	12	149	2e-07	57.4	gi|1028187614|ref|WP_063932782.1|;gi|1017520165|emb|CZZ05099.1|	hypothetical protein [Enterobacter cloacae]<>Uncharacterised protein [Enterobacter cloacae]
Loki_gp08	31.41	156	83	6	12	147	3	154	2e-07	57.4	gi|1040492978|ref|WP_065115665.1|;gi|1031803993|gb|OAM65772.1|	hypothetical protein [Agrobacterium rhizogenes]<>hypothetical protein A8L48_22520 [Agrobacterium rhizogenes]
Loki_gp08	28.87	142	86	5	17	147	12	149	2e-07	57.4	gi|976149860|ref|WP_059308073.1|;gi|975038234|gb|ALZ96759.1|	hypothetical protein [Leclercia adecarboxylata]<>hypothetical protein APT61_12325 [Leclercia adecarboxylata]
Loki_gp08	28.87	142	86	5	17	147	12	149	2e-07	57.4	gi|970280381|ref|WP_058659089.1|;gi|967122199|gb|KTI01743.1|	hypothetical protein [Enterobacter hormaechei]<>hypothetical protein ASV11_14270 [Enterobacter hormaechei subsp. oharae]
Loki_gp08	29.58	142	85	5	17	147	12	149	2e-07	57	gi|949720242|ref|WP_057064553.1|;gi|938649376|gb|KPR52543.1|	hypothetical protein [Citrobacter freundii]<>hypothetical protein AN672_20990 [Citrobacter freundii]
Loki_gp08	28.87	142	86	5	17	147	12	149	4e-07	56.6	gi|695646502|ref|WP_032617996.1|;gi|668974368|gb|KFC89476.1|	hypothetical protein [Leclercia adecarboxylata]<>phage protein [Leclercia adecarboxylata ATCC 23216 = NBRC 102595]
Loki_gp08	28.17	142	87	5	17	147	12	149	4e-07	56.6	gi|554690301|ref|WP_023186803.1|;gi|554042849|gb|ESE88576.1|;gi|738576255|gb|KHQ79654.1|	hypothetical protein [Salmonella enterica]<>phage protein [Salmonella enterica subsp. houtenae serovar 50:g,z51:- str. 01-0133]<>hypothetical protein RK55_16465 [Salmonella enterica subsp. houtenae]
Loki_gp08	28.87	142	86	5	17	147	12	149	4e-07	56.6	gi|1116002207|ref|WP_072139834.1|;gi|808681866|emb|CQR77965.1|	hypothetical protein [Enterobacter cloacae]<>hypothetical protein BN1385_02871 [Enterobacter cloacae]
Loki_gp08	30.67	163	88	6	12	154	3	160	4e-07	56.6	gi|950175070|ref|WP_057222757.1|;gi|945824840|gb|KQY78646.1|	hypothetical protein [Ensifer sp. Root142]<>hypothetical protein ASD52_02020 [Ensifer sp. Root142]
Loki_gp08	28.87	142	86	5	17	147	12	149	4e-07	56.6	gi|895882069|ref|WP_048986158.1|;gi|1022022139|gb|KZQ66109.1|	MULTISPECIES: hypothetical protein [Enterobacter cloacae complex]<>hypothetical protein A3N62_23210 [Enterobacter kobei]
Loki_gp08	28.87	142	86	5	17	147	12	149	4e-07	56.6	gi|798846065|ref|WP_045892363.1|;gi|794284647|gb|KJX41228.1|;gi|1017440514|emb|SAC56624.1|;gi|1017455119|emb|SAD69741.1|;gi|1017459029|emb|SAC25528.1|;gi|1017546386|emb|SAC36407.1|;gi|1017568533|emb|SAH18856.1|	MULTISPECIES: hypothetical protein [Enterobacter cloacae complex]<>hypothetical protein SG79_23075 [Enterobacter hormaechei subsp. oharae]<>Uncharacterised protein [Enterobacter cloacae]<>Uncharacterised protein [Enterobacter cloacae]<>Uncharacterised protein [Enterobacter cloacae]<>Uncharacterised protein [Enterobacter cloacae]<>Uncharacterised protein [Enterobacter cloacae]
Loki_gp08	27.92	154	95	6	5	147	1	149	4e-07	56.6	gi|970345371|ref|WP_058691324.1|;gi|967172787|gb|KTI50751.1|	hypothetical protein [Enterobacter hormaechei]<>hypothetical protein ASV04_12425 [Enterobacter hormaechei subsp. oharae]
Loki_gp08	28.17	142	87	5	17	147	12	149	4e-07	56.6	gi|1028177127|ref|WP_063924631.1|;gi|1017684319|emb|SAD59449.1|	hypothetical protein [Enterobacter cloacae]<>Uncharacterised protein [Enterobacter cloacae]
Loki_gp08	28.87	142	86	5	17	147	12	149	4e-07	56.6	gi|1028201730|ref|WP_063945432.1|;gi|1017428358|emb|SAH46350.1|	hypothetical protein [Enterobacter cloacae]<>Uncharacterised protein [Enterobacter cloacae]
Loki_gp08	29.58	142	85	5	17	147	12	149	5e-07	56.2	gi|1068613322|ref|WP_069602009.1|;gi|1067040306|gb|AOP86679.1|	hypothetical protein [Enterobacter kobei]<>hypothetical protein BFV64_10080 [Enterobacter kobei]
Loki_gp08	28.87	142	86	5	17	147	12	149	5e-07	56.2	gi|835741894|ref|WP_047642181.1|;gi|721545862|gb|KGY89202.1|	hypothetical protein [Enterobacter cloacae]<>hypothetical protein MC57_01995 [Enterobacter cloacae]
Loki_gp08	28.87	142	86	5	17	147	12	149	5e-07	56.2	gi|556320002|ref|WP_023295190.1|;gi|555043484|gb|ESL87791.1|;gi|1014978386|emb|CZY75853.1|;gi|1017952036|emb|SAA36306.1|	hypothetical protein [Enterobacter cloacae]<>hypothetical protein L422_00621 [Enterobacter cloacae UCICRE 11]<>Uncharacterised protein [Enterobacter cloacae]<>Uncharacterised protein [Enterobacter cloacae]
Loki_gp08	28.87	142	86	5	17	147	12	149	5e-07	56.2	gi|1016937542|ref|WP_063139347.1|;gi|1015182535|emb|CZY98964.1|;gi|1017638843|emb|SAB33609.1|	hypothetical protein [Enterobacter cloacae]<>Uncharacterised protein [Enterobacter cloacae]<>Uncharacterised protein [Enterobacter cloacae]
Loki_gp08	28.87	142	86	5	17	147	12	149	5e-07	56.2	gi|970263176|ref|WP_058647522.1|;gi|967173562|gb|KTI51519.1|;gi|978006771|gb|KVJ13145.1|;gi|978012450|gb|KVJ18719.1|;gi|978018753|gb|KVJ24887.1|;gi|978025750|gb|KVJ31731.1|;gi|978028515|gb|KVJ34461.1|	hypothetical protein [Enterobacter hormaechei]<>hypothetical protein ASV02_23870 [Enterobacter hormaechei subsp. oharae]<>hypothetical protein AWS39_23335 [Enterobacter hormaechei subsp. oharae]<>hypothetical protein AWS38_08160 [Enterobacter hormaechei subsp. oharae]<>hypothetical protein AWS37_22580 [Enterobacter hormaechei subsp. oharae]<>hypothetical protein AWS36_19755 [Enterobacter hormaech…
Loki_gp08	28.87	142	86	5	17	147	12	149	5e-07	56.2	gi|671539702|ref|WP_031523392.1|	hypothetical protein [Siccibacter colletis]
Loki_gp08	28.17	142	87	5	17	147	12	149	6e-07	56.2	gi|1103826311|ref|WP_071701207.1|;gi|1103191144|gb|OIZ37329.1|	hypothetical protein [Citrobacter freundii]<>hypothetical protein BEH70_22335 [Citrobacter freundii]
Loki_gp08	28.87	142	86	5	17	147	12	149	6e-07	56.2	gi|782743478|ref|WP_045626288.1|;gi|771098797|gb|KJM70685.1|;gi|829334609|gb|KLQ27072.1|;gi|838648643|gb|KLW32568.1|;gi|971530415|gb|KUH54067.1|;gi|1017466874|emb|SAF39642.1|;gi|1017695522|emb|SAD25037.1|;gi|1021921709|gb|KZP69593.1|	MULTISPECIES: hypothetical protein [Enterobacter cloacae complex]<>hypothetical protein SS16_22635 [Enterobacter hormaechei subsp. oharae]<>hypothetical protein ABF72_14310 [Enterobacter hormaechei subsp. steigerwaltii]<>hypothetical protein SK51_04240 [Enterobacter sp. MGH85]<>hypothetical protein APR64_00040 [Enterobacter cloacae subsp. cloacae]<>Uncharacterised protein [Enterobacter cloacae]<>…
Loki_gp08	31.41	156	83	6	12	147	3	154	6e-07	56.2	gi|739230106|ref|WP_037093377.1|;gi|690569121|gb|KGE80398.1|;gi|1045904992|gb|ANV26879.1|	MULTISPECIES: hypothetical protein [Rhizobium]<>hypothetical protein LW14_23255 [Rhizobium sp. H41]<>hypothetical protein BA939_23680 [Rhizobium sp. S41]
Loki_gp08	31.4	172	86	8	19	162	2	169	7e-07	56.2	gi|835871844|ref|WP_047693031.1|;gi|695207598|gb|KGK59576.1|	hypothetical protein [Xanthomonas cannabis]<>hypothetical protein NC00_01240 [Xanthomonas cannabis pv. phaseoli]
Loki_gp08	28.87	142	86	5	17	147	12	149	7e-07	55.8	gi|550796140|ref|WP_022651631.1|;gi|550218313|gb|ERP08666.1|;gi|578352625|gb|EUN11616.1|	MULTISPECIES: hypothetical protein [Enterobacter cloacae complex]<>hypothetical protein L360_03389 [Enterobacter sp. MGH 14]<>hypothetical protein L349_06191 [Enterobacter sp. MGH 3]
Loki_gp08	28.17	142	87	5	17	147	12	149	9e-07	55.5	gi|851922037|ref|WP_048218125.1|;gi|838683562|gb|KLW67202.1|;gi|967044541|gb|KTH26818.1|;gi|1017660849|emb|CZZ86699.1|	MULTISPECIES: hypothetical protein [Enterobacter cloacae complex]<>hypothetical protein SK57_01376 [Enterobacter sp. BIDMC87]<>hypothetical protein ASV30_19100 [Enterobacter hormaechei subsp. oharae]<>Uncharacterised protein [Enterobacter cloacae]
Loki_gp08	28.17	142	87	5	17	147	12	149	9e-07	55.5	gi|1008693413|gb|KYJ78948.1|	hypothetical protein AT292_05260 [Enterobacter cloacae]
Loki_gp08	28.17	142	87	5	17	147	12	149	1e-06	55.5	gi|1068588803|ref|WP_069597655.1|;gi|1067035960|gb|AOP82334.1|;gi|1067037115|gb|AOP83489.1|	hypothetical protein [Enterobacter hormaechei]<>hypothetical protein BFV66_10015 [Enterobacter hormaechei subsp. oharae]<>hypothetical protein BFV66_16160 [Enterobacter hormaechei subsp. oharae]
Loki_gp08	31.54	130	76	5	17	136	12	138	1e-06	55.5	gi|896290488|ref|WP_049273126.1|	MULTISPECIES: hypothetical protein [Enterobacterales]
Loki_gp08	28.17	142	87	5	17	147	12	149	1e-06	55.5	gi|779847497|ref|WP_045346868.1|;gi|771090126|gb|KJM64196.1|	hypothetical protein [Enterobacter hormaechei]<>hypothetical protein SS59_19875 [Enterobacter hormaechei subsp. oharae]
Loki_gp08	28.17	142	87	5	17	147	12	149	1e-06	55.1	gi|782728300|ref|WP_045621109.1|;gi|772487017|gb|KJQ15139.1|;gi|923343211|gb|KOQ87348.1|;gi|1014938963|emb|CZU68821.1|;gi|1015363531|emb|CZV31600.1|;gi|1017792742|emb|SAD14559.1|;gi|1017899258|emb|SAB37583.1|;gi|1018014855|emb|SAF22694.1|;gi|1018017599|emb|SAD71446.1|;gi|1018099363|emb|SAC97307.1|;gi|1069029370|gb|OEG94199.1|	MULTISPECIES: hypothetical protein [Enterobacter cloacae complex]<>hypothetical protein VE18_04385 [Enterobacter cloacae]<>hypothetical protein ABW49_21480 [Enterobacter asburiae]<>Uncharacterised protein [Enterobacter cloacae]<>Uncharacterised protein [Enterobacter cloacae]<>Uncharacterised protein [Enterobacter cloacae]<>Uncharacterised protein [Enterobacter cloacae]<>Uncharacterised protein [E…
Loki_gp09	100	127	0	0	1	127	1	127	2e-88	261	gi|949419300|emb|CUS06470.1|	putative head-tail joining protein [unclassified Siphoviridae]
Loki_gp09	70.87	127	37	0	1	127	1	127	9e-62	193	gi|589892173|ref|YP_009008538.1|;gi|583926727|gb|AHI60033.1|	putative head-tail joining protein [Acinetobacter phage IME_AB3]<>putative head-tail joining protein [Acinetobacter phage IME_AB3]
Loki_gp09	36.22	127	78	3	1	126	1	125	4e-15	75.5	gi|388542674|ref|YP_006299879.1|;gi|378407742|gb|AFB83303.1|	virion protein [Pseudomonas phage vB_Pae-Kakheti25]<>virion protein [Pseudomonas phage vB_Pae-Kakheti25]
Loki_gp09	36.22	127	78	3	1	126	1	125	7e-15	74.7	gi|823081466|gb|AKI28821.1|	head-tail joining protein [Stenotrophomonas phage vB_SmaS-DLP_1]
Loki_gp09	36.22	127	78	3	1	126	1	125	2e-14	73.9	gi|148912842|ref|YP_001293421.1|;gi|701904478|gb|AIW01679.1|	hypothetical protein ORF014 [Pseudomonas phage 73]<>hypothetical protein vB_Pae_PS9N_00028 [Pseudomonas phage vB_Pae_PS9N]
Loki_gp09	35.83	120	75	2	1	119	1	119	1e-13	71.6	gi|971751689|ref|YP_009205610.1|;gi|936761527|gb|ALH23586.1|	virion structural protein [Pseudomonas phage PaMx42]<>virion structural protein [Pseudomonas phage PaMx42]
Loki_gp09	35.43	127	79	3	1	126	1	125	1e-13	71.6	gi|658311472|ref|YP_009044349.1|;gi|656178014|emb|CDN96775.1|	virion protein [Pseudomonas phage vB_PaeS_SCH_Ab26]<>virion protein [Pseudomonas phage vB_PaeS_SCH_Ab26]
Loki_gp09	34.65	127	80	3	1	126	1	125	3e-13	70.5	gi|971766257|ref|YP_009219172.1|;gi|823081406|gb|AKI28762.1|	head-tail joining protein [Stenotrophomonas phage vB_SmaS-DLP_2]<>head-tail joining protein [Stenotrophomonas phage vB_SmaS-DLP_2]
Loki_gp09	31.93	119	79	2	1	119	1	117	1e-09	61.6	gi|399528729|ref|YP_006560766.1|;gi|371767565|gb|AEX56099.1|	head-tail joining protein [Burkholderia phage KL1]<>head-tail joining protein [Burkholderia phage KL1]
Loki_gp09	26.98	126	76	6	4	127	5	116	2	36.6	gi|1129576216|ref|WP_075524110.1|;gi|1045648949|gb|OCG68518.1|	hypothetical protein [Gilliamella apicola]<>hypothetical protein A9G39_02680 [Gilliamella apicola]
Loki_gp09	26.98	126	76	6	4	127	5	116	3	36.2	gi|1046178872|ref|WP_065575164.1|;gi|1045640305|gb|OCG60419.1|	hypothetical protein [Gilliamella apicola]<>hypothetical protein A9G37_03665 [Gilliamella apicola]
Loki_gp09	32.53	83	50	3	44	126	48	124	8	36.2	gi|1059964892|ref|WP_069045599.1|;gi|1059491055|gb|AOF84171.1|	hypothetical protein [Hydrogenophaga sp. RAC07]<>hypothetical protein BSY239_675 [Hydrogenophaga sp. RAC07]
Loki_gp10	100	147	0	0	1	147	1	147	3e-106	308	gi|949419301|emb|CUS06471.1|	putative tail terminator protein [unclassified Siphoviridae]
Loki_gp10	72.11	147	41	0	1	147	1	147	1e-73	225	gi|589892172|ref|YP_009008537.1|;gi|583926726|gb|AHI60032.1|	putative minor tail protein [Acinetobacter phage IME_AB3]<>putative minor tail protein [Acinetobacter phage IME_AB3]
Loki_gp10	37.82	156	82	4	1	146	1	151	3e-25	102	gi|399528730|ref|YP_006560767.1|;gi|371767566|gb|AEX56100.1|	minor tail protein [Burkholderia phage KL1]<>minor tail protein [Burkholderia phage KL1]
Loki_gp10	38.62	145	82	3	8	146	7	150	2e-24	100	gi|971751688|ref|YP_009205611.1|;gi|936761526|gb|ALH23585.1|	tail terminator protein [Pseudomonas phage PaMx42]<>tail terminator protein [Pseudomonas phage PaMx42]
Loki_gp10	41.09	129	74	2	19	146	23	150	5e-24	99.8	gi|658311473|ref|YP_009044350.1|;gi|656178015|emb|CDN96776.1|	virion protein [Pseudomonas phage vB_PaeS_SCH_Ab26]<>virion protein [Pseudomonas phage vB_PaeS_SCH_Ab26]
Loki_gp10	40.31	129	75	2	19	146	23	150	2e-23	98.2	gi|148912843|ref|YP_001293422.1|;gi|388542675|ref|YP_006299880.1|;gi|378407743|gb|AFB83304.1|;gi|701904479|gb|AIW01680.1|	hypothetical protein ORF015 [Pseudomonas phage 73]<>virion protein [Pseudomonas phage vB_Pae-Kakheti25]<>virion protein [Pseudomonas phage vB_Pae-Kakheti25]<>hypothetical protein vB_Pae_PS9N_00029 [Pseudomonas phage vB_Pae_PS9N]
Loki_gp10	40	130	76	2	18	146	22	150	2e-23	98.2	gi|823081459|gb|AKI28814.1|	minor tail protein [Stenotrophomonas phage vB_SmaS-DLP_1]
Loki_gp10	40.31	129	75	2	19	146	23	150	3e-23	97.8	gi|971766250|ref|YP_009219173.1|;gi|823081399|gb|AKI28755.1|	minor tail protein [Stenotrophomonas phage vB_SmaS-DLP_2]<>minor tail protein [Stenotrophomonas phage vB_SmaS-DLP_2]
Loki_gp10	38.26	149	81	4	3	145	2	145	8e-18	84	gi|985760160|ref|YP_009225681.1|;gi|910307317|gb|AKU43033.1|;gi|910307500|gb|AKU43199.1|	hypothetical protein RCTITAN_16 [Rhodobacter phage RcTitan]<>hypothetical protein RCTITAN_16 [Rhodobacter phage RcTitan]<>minor tail protein [Rhodobacter phage RcSpartan]
Loki_gp11	100	508	0	0	1	508	1	508	0	1026	gi|949419302|emb|CUS06472.1|	putative major tail protein [unclassified Siphoviridae]
Loki_gp11	80.75	509	97	1	1	508	1	509	0	840	gi|589892171|ref|YP_009008536.1|;gi|583926725|gb|AHI60031.1|	putative major tail tube protein [Acinetobacter phage IME_AB3]<>putative major tail tube protein [Acinetobacter phage IME_AB3]
Loki_gp11	56.16	511	221	2	1	508	1	511	0	557	gi|971766231|ref|YP_009219174.1|;gi|823081380|gb|AKI28736.1|	major tail tube protein [Stenotrophomonas phage vB_SmaS-DLP_2]<>major tail tube protein [Stenotrophomonas phage vB_SmaS-DLP_2]
Loki_gp11	55.77	511	223	2	1	508	1	511	0	555	gi|388542676|ref|YP_006299881.1|;gi|378407744|gb|AFB83305.1|	major tail tube protein [Pseudomonas phage vB_Pae-Kakheti25]<>major tail tube protein [Pseudomonas phage vB_Pae-Kakheti25]
Loki_gp11	55.77	511	223	2	1	508	1	511	0	554	gi|823081439|gb|AKI28794.1|	major tail tube protein [Stenotrophomonas phage vB_SmaS-DLP_1]
Loki_gp11	55.38	511	225	2	1	508	1	511	0	551	gi|148912844|ref|YP_001293423.1|	hypothetical protein ORF016 [Pseudomonas phage 73]
Loki_gp11	55.38	511	225	2	1	508	1	511	0	551	gi|701904480|gb|AIW01681.1|	hypothetical protein vB_Pae_PS9N_00030 [Pseudomonas phage vB_Pae_PS9N]
Loki_gp11	54.71	510	227	3	3	508	4	513	0	545	gi|971751687|ref|YP_009205612.1|;gi|936761525|gb|ALH23584.1|	major tail structural protein [Pseudomonas phage PaMx42]<>major tail structural protein [Pseudomonas phage PaMx42]
Loki_gp11	55.38	511	225	2	1	508	1	511	0	540	gi|658311474|ref|YP_009044351.1|;gi|656178016|emb|CDN96777.1|	major tail tube protein [Pseudomonas phage vB_PaeS_SCH_Ab26]<>major tail tube protein [Pseudomonas phage vB_PaeS_SCH_Ab26]
Loki_gp11	50.78	514	245	4	3	508	4	517	3e-170	499	gi|399528731|ref|YP_006560768.1|;gi|371767567|gb|AEX56101.1|	hypothetical protein KL1_00017 [Burkholderia phage KL1]<>hypothetical protein KL1_00017 [Burkholderia phage KL1]
Loki_gp11	51.59	504	240	2	6	505	3	506	3e-170	499	gi|936761765|gb|ALH23813.1|	major tail structural protein [Pseudomonas phage PaMx25]
Loki_gp11	51.39	504	241	2	6	505	3	506	6e-170	498	gi|1070101647|ref|YP_009285827.1|;gi|1026924160|gb|AND74866.1|	major tail structural protein [Pseudomonas phage NP1]<>major tail structural protein [Pseudomonas phage NP1]
Loki_gp11	48.76	523	250	7	2	506	3	525	3e-164	484	gi|1015669859|gb|AMW36132.1|	major tail tube protein [Xanthomonas phage XAJ2]
Loki_gp11	48.42	506	255	3	6	505	3	508	9e-156	462	gi|971762587|ref|YP_009215710.1|;gi|930349073|gb|ALF51519.1|	putative major tail protein [Pseudomonas phage PAE1]<>putative major tail protein [Pseudomonas phage PAE1]
Loki_gp11	48.22	506	256	3	6	505	3	508	1e-155	461	gi|399529028|ref|YP_006561073.1|;gi|394778554|gb|AFN39637.1|	major structural protein [Pseudomonas phage MP1412]<>major structural protein [Pseudomonas phage MP1412]
Loki_gp11	48.42	506	255	3	6	505	3	508	2e-155	461	gi|149408256|ref|YP_001294535.1|	hypothetical protein ORF027 [Pseudomonas phage M6]
Loki_gp11	48.22	506	256	3	6	505	3	508	7e-154	457	gi|1041568262|gb|ANO57384.1|	major tail tube protein [Pseudomonas phage AN14]
Loki_gp11	48.81	506	253	3	6	505	3	508	2e-151	451	gi|162135148|ref|YP_001595889.1|;gi|161513995|emb|CAO77821.1|	major structural phage protein [Pseudomonas phage YuA]<>major structural phage protein [Pseudomonas phage YuA]
Loki_gp11	46.29	512	267	5	1	507	1	509	2e-151	451	gi|764162038|ref|YP_009126434.1|;gi|746947756|gb|AJD83168.1|	major tail tube protein [Paracoccus phage vB_PmaS_IMEP1]<>major tail tube protein [Paracoccus phage vB_PmaS_IMEP1]
Loki_gp11	48.42	506	255	3	6	505	3	508	5e-147	439	gi|471216573|gb|AGI11313.1|	hypothetical protein LKO4_0066 [Pseudomonas phage LKO4]
Loki_gp11	43.22	509	285	4	1	507	1	507	2e-136	412	gi|1046296616|ref|WP_065638149.1|;gi|1045593516|gb|OCG15992.1|	hypothetical protein [Gilliamella apicola]<>hypothetical protein A9G24_01210 [Gilliamella apicola]
Loki_gp11	43.03	509	286	4	1	507	1	507	7e-136	411	gi|1129592415|ref|WP_075539115.1|;gi|1045609877|gb|OCG31615.1|	hypothetical protein [Gilliamella apicola]<>hypothetical protein A9G29_06215 [Gilliamella apicola]
Loki_gp11	41.47	504	290	3	8	507	7	509	1e-128	392	gi|1046160780|ref|WP_065557710.1|;gi|1045578975|gb|OCG01735.1|	hypothetical protein [Gilliamella apicola]<>hypothetical protein A9G10_03175 [Gilliamella apicola]
Loki_gp11	43.56	489	259	6	32	508	254	737	6e-122	383	gi|910307501|gb|AKU43200.1|	major tail tube [Rhodobacter phage RcSpartan]
Loki_gp11	43.35	489	260	6	32	508	254	737	3e-121	381	gi|985760161|ref|YP_009225682.1|;gi|910307318|gb|AKU43034.1|	hypothetical protein RCTITAN_17 [Rhodobacter phage RcTitan]<>hypothetical protein RCTITAN_17 [Rhodobacter phage RcTitan]
Loki_gp11	40	540	290	8	3	508	5	544	5e-120	372	gi|971821768|ref|YP_009220350.1|;gi|827196348|gb|AKJ71374.1|	major tail tube protein [Achromobacter phage phiAxp-1]<>major tail tube protein [Achromobacter phage phiAxp-1]
Loki_gp11	37.64	518	303	8	1	505	1	511	1e-101	323	gi|1011715716|ref|WP_062559553.1|;gi|958298799|gb|ALQ51920.1|;gi|1088848743|emb|SDT96577.1|	hypothetical protein [Nitrosomonas ureae]<>hypothetical protein ATY38_12230 [Nitrosomonas ureae]<>hypothetical protein SAMN05216406_11422 [Nitrosomonas ureae]
Loki_gp11	38.42	557	283	15	1	505	2	550	1e-94	306	gi|62327180|ref|YP_224002.1|;gi|50059498|gb|AAT69470.1|	gp78 [Phage phiJL001]<>gp78 [Phage phiJL001]
Loki_gp11	38.87	373	196	8	153	505	66	426	7e-69	236	gi|146329924|ref|YP_001210232.1|;gi|145321100|gb|ABP63583.1|	BcepGomrgp12 [Burkholderia phage BcepGomr]<>BcepGomrgp12 [Burkholderia phage BcepGomr]
Loki_gp11	60.53	114	40	1	1	114	1	109	6e-36	148	gi|146329924|ref|YP_001210232.1|;gi|145321100|gb|ABP63583.1|	BcepGomrgp12 [Burkholderia phage BcepGomr]<>BcepGomrgp12 [Burkholderia phage BcepGomr]
Loki_gp11	31.55	504	319	10	7	503	3	487	7e-54	198	gi|590121797|dbj|BAO53118.1|	virion protein [Pseudomonas phage KPP23]
Loki_gp11	38.61	303	174	6	213	505	137	437	1e-51	191	gi|971741692|ref|YP_009196202.1|;gi|746947365|gb|AJD82783.1|	hypothetical protein JWX_00017 [Achromobacter phage JWX]<>hypothetical protein JWX_00017 [Achromobacter phage JWX]
Loki_gp11	32.78	180	95	6	3	164	4	175	5e-15	87.8	gi|971741692|ref|YP_009196202.1|;gi|746947365|gb|AJD82783.1|	hypothetical protein JWX_00017 [Achromobacter phage JWX]<>hypothetical protein JWX_00017 [Achromobacter phage JWX]
Loki_gp11	32.31	489	302	11	5	477	1	476	3e-51	191	gi|891439062|gb|AKQ75857.1|	major capsid protein [Roseobacter phage RDJL Phi 2]
Loki_gp11	36.96	303	176	6	213	505	136	433	1e-50	188	gi|971747951|ref|YP_009201749.1|;gi|746947431|gb|AJD82848.1|	hypothetical protein JWAP_00015 [Achromobacter phage 83-24]<>hypothetical protein JWAP_00015 [Achromobacter phage 83-24]
Loki_gp11	50	102	48	1	3	101	4	105	1e-21	107	gi|971747951|ref|YP_009201749.1|;gi|746947431|gb|AJD82848.1|	hypothetical protein JWAP_00015 [Achromobacter phage 83-24]<>hypothetical protein JWAP_00015 [Achromobacter phage 83-24]
Loki_gp11	29.92	508	315	16	4	503	10	484	8e-48	181	gi|712914003|ref|YP_009101217.1|;gi|645494974|gb|AIB07050.1|	major tail protein [Salmonella phage 9NA]<>major tail protein [Salmonella phage 9NA]
Loki_gp11	31.21	487	310	12	5	477	1	476	2e-47	181	gi|331028132|ref|YP_004421846.1|;gi|301341595|gb|ADK73479.1|	major capsid protein [Roseobacter phage RDJL Phi 1]<>major capsid protein [Roseobacter phage RDJL Phi 1]
Loki_gp11	30.66	486	308	12	7	477	3	474	6e-46	177	gi|672581470|gb|KFH18435.1|	hypothetical protein IB60_17150 [Brucella abortus LMN1]
Loki_gp11	29.33	508	318	16	4	503	10	484	3e-45	175	gi|451939149|gb|AGF89327.1|;gi|451939383|gb|AGF89546.1|	hypothetical protein SP062_00235 [Salmonella phage FSL SP-062]<>hypothetical protein SP069_00235 [Salmonella phage SP069]
Loki_gp11	28.29	509	324	17	3	503	9	484	3e-40	160	gi|1131741166|gb|APU92798.1|;gi|1131741258|gb|APU92889.1|	major tail tube protein [Salmonella phage vB_SenS_Sasha]<>major tail tube protein [Salmonella phage vB_SenS_Sergei]
Loki_gp11	28.76	466	287	13	26	474	22	459	4e-26	121	gi|655959966|ref|WP_029002723.1|	hypothetical protein [Azorhizobium doebereinerae]
Loki_gp11	30.51	390	237	14	131	504	125	496	6e-24	115	gi|754564944|ref|WP_041958528.1|;gi|712700425|gb|KGT75793.1|	hypothetical protein [Bradyrhizobium japonicum]<>hypothetical protein MA20_31860 [Bradyrhizobium japonicum]
Loki_gp11	27.78	378	245	12	136	502	129	489	4e-22	109	gi|1120183620|ref|WP_073052002.1|;gi|1110335826|emb|SHF02590.1|	hypothetical protein [Kaistia soli]<>hypothetical protein SAMN02745157_1466 [Kaistia soli DSM 19436]
Loki_gp11	27.6	384	241	12	131	500	129	489	1e-16	92.8	gi|950160299|ref|WP_057210466.1|;gi|945423516|gb|KQU79818.1|	hypothetical protein [Ensifer sp. Root31]<>hypothetical protein ASD00_36015 [Ensifer sp. Root31]
Loki_gp11	26.79	265	172	8	201	464	174	417	1e-13	84	gi|746055173|ref|WP_039123984.1|;gi|743689527|gb|AJC48693.1|	hypothetical protein [Allofrancisella guangzhouensis]<>hypothetical protein SD28_03065 [Allofrancisella guangzhouensis]
Loki_gp11	36.14	166	92	6	131	292	127	282	4e-10	72.8	gi|503965172|ref|WP_014199166.1|;gi|356881657|emb|CCD02646.1|	hypothetical protein [Azospirillum brasilense]<>conserved protein of unknown function (plasmid) [Azospirillum brasilense Sp245]
Loki_gp11	27.81	356	221	12	131	474	127	458	7e-10	72	gi|563575934|ref|WP_023781093.1|;gi|563164909|gb|ESY88336.1|	hypothetical protein [Mesorhizobium sp. LNHC220B00]<>hypothetical protein X739_00510 [Mesorhizobium sp. LNHC220B00]
Loki_gp11	36.14	166	92	6	131	292	127	282	9e-10	71.6	gi|737712871|ref|WP_035681717.1|	hypothetical protein [Azospirillum brasilense]
Loki_gp11	38.41	151	83	6	131	276	102	247	2e-08	67.8	gi|916950197|ref|WP_051556909.1|	hypothetical protein [Ochrobactrum intermedium]
Loki_gp11	29.13	254	154	10	192	441	81	312	0.0008	52.8	gi|1093979798|ref|WP_070978387.1|;gi|1092985627|gb|AOZ48843.1|	hypothetical protein [Chromobacterium vaccinii]<>hypothetical protein BKX93_01745 [Chromobacterium vaccinii]
Loki_gp11	29.27	246	148	10	200	441	89	312	0.001	52.4	gi|860371911|ref|WP_048403460.1|	hypothetical protein [Chromobacterium violaceum]
Loki_gp11	29.27	246	148	10	200	441	111	334	0.001	52.4	gi|860378055|ref|WP_048405528.1|;gi|857275427|gb|KMN48781.1|;gi|857318866|gb|KMN87876.1|;gi|857320940|gb|KMN89105.1|;gi|857338077|gb|KMO05479.1|	hypothetical protein [Chromobacterium violaceum]<>hypothetical protein VK93_14895 [Chromobacterium violaceum]<>hypothetical protein VL02_00890 [Chromobacterium violaceum]<>hypothetical protein VL04_17630 [Chromobacterium violaceum]<>hypothetical protein VL16_02875 [Chromobacterium violaceum]
Loki_gp11	32.05	78	52	1	390	466	197	274	0.007	49.7	gi|489682548|ref|WP_003586770.1|;gi|392850362|gb|EJB02883.1|	hypothetical protein [Rhizobium leguminosarum]<>hypothetical protein Rleg9DRAFT_1697 [Rhizobium leguminosarum bv. trifolii WSM597]
Loki_gp11	34.12	85	54	2	386	468	193	277	0.01	48.9	gi|1011778459|ref|WP_062601024.1|;gi|945225171|gb|KQS83422.1|	hypothetical protein [Rhizobium sp. Leaf383]<>hypothetical protein ASG58_22060 [Rhizobium sp. Leaf383]
Loki_gp11	34.12	85	54	2	386	468	193	277	0.01	48.9	gi|1011622041|ref|WP_062472535.1|;gi|945219803|gb|KQS78083.1|;gi|945221434|gb|KQS79710.1|	MULTISPECIES: hypothetical protein [Rhizobium]<>hypothetical protein ASG58_06645 [Rhizobium sp. Leaf383]<>hypothetical protein ASG25_21885 [Rhizobium sp. Leaf384]
Loki_gp11	34.12	85	54	2	386	468	193	277	0.01	48.5	gi|1011622010|ref|WP_062472509.1|;gi|945221555|gb|KQS79828.1|	hypothetical protein [Rhizobium sp. Leaf384]<>hypothetical protein ASG25_21810 [Rhizobium sp. Leaf384]
Loki_gp11	32.94	85	55	2	386	468	193	277	0.02	48.5	gi|1103322576|emb|SER57692.1|	hypothetical protein SAMN03159406_00542 [Rhizobium sp. NFR03]
Loki_gp11	28.46	246	150	10	200	441	111	334	0.02	48.5	gi|759932412|ref|WP_043617683.1|	hypothetical protein [Chromobacterium violaceum]
Loki_gp11	22	459	309	19	40	473	33	467	0.06	47.4	gi|575461074|gb|AHG92126.1|;gi|575461142|gb|AHG92194.1|	hypothetical protein J421_4591 (plasmid) [Gemmatirosa kalamazoonesis]<>hypothetical protein J421_4659 (plasmid) [Gemmatirosa kalamazoonesis]
Loki_gp11	32.05	78	52	1	390	466	199	276	0.1	45.8	gi|1113128107|gb|OJU03589.1|	hypothetical protein BGN87_18470 [Rhizobiales bacterium 65-79]
Loki_gp11	26.97	89	63	2	390	476	197	285	0.1	45.4	gi|1102043894|ref|WP_071585178.1|;gi|1095636785|gb|OHZ30850.1|	hypothetical protein [Agrobacterium vitis]<>hypothetical protein BBL07_22560 [Agrobacterium vitis]
Loki_gp11	30.11	93	63	2	386	476	195	287	0.5	43.9	gi|1113513611|gb|OJX74202.1|	hypothetical protein BGO93_16735 [Mesorhizobium sp. 65-26]
Loki_gp11	27.78	90	64	1	386	474	193	282	2	41.6	gi|835724469|ref|WP_047630719.1|	hypothetical protein [Rhizobium tropici]
Loki_gp11	26.64	244	157	8	200	441	89	312	6	40.4	gi|1041010611|ref|WP_065202693.1|;gi|1040779596|gb|OBU85491.1|	hypothetical protein [Chromobacterium subtsugae]<>hypothetical protein MY55_16065 [Chromobacterium subtsugae]
Loki_gp12	100	146	0	0	1	146	1	146	2e-103	300	gi|949419304|emb|CUS06474.1|	putative tail assembly chaperone [unclassified Siphoviridae]
Loki_gp12	100	146	0	0	1	146	1	146	5e-102	301	gi|949419303|emb|CUS06473.1|	putative tail assembly chaperone [unclassified Siphoviridae]
Loki_gp12	68.49	146	46	0	1	146	14	159	4e-68	211	gi|589892170|ref|YP_009008535.1|;gi|583926724|gb|AHI60030.1|	putative tail chaperonin protein [Acinetobacter phage IME_AB3]<>putative tail chaperonin protein [Acinetobacter phage IME_AB3]
Loki_gp12	56.16	146	57	2	1	146	1	139	4e-49	163	gi|985760162|ref|YP_009225683.1|;gi|910307319|gb|AKU43035.1|	tail chaperonin [Rhodobacter phage RcTitan]<>tail chaperonin [Rhodobacter phage RcTitan]
Loki_gp12	56.16	146	57	2	1	146	1	139	1e-48	161	gi|910307502|gb|AKU43201.1|	tail chaperonin [Rhodobacter phage RcSpartan]
Loki_gp12	53.74	147	59	3	2	146	3	142	6e-45	152	gi|399528732|ref|YP_006560770.1|;gi|371767568|gb|AEX56102.1|	tail protein [Burkholderia phage KL1]<>tail protein [Burkholderia phage KL1]
Loki_gp12	51.37	146	62	3	3	146	4	142	4e-43	147	gi|971751686|ref|YP_009205613.1|;gi|936761524|gb|ALH23583.1|	putative virion structural protein [Pseudomonas phage PaMx42]<>putative virion structural protein [Pseudomonas phage PaMx42]
Loki_gp12	53.74	147	59	3	2	146	3	142	4e-43	151	gi|399528756|ref|YP_006560769.1|;gi|371767592|gb|AEX56126.1|	tail protein [Burkholderia phage KL1]<>tail protein [Burkholderia phage KL1]
Loki_gp12	49.32	146	65	3	3	146	4	142	5e-41	142	gi|701904481|gb|AIW01682.1|	hypothetical protein vB_Pae_PS9N_00031 [Pseudomonas phage vB_Pae_PS9N]
Loki_gp12	49.32	146	65	3	3	146	4	142	5e-41	142	gi|148912845|ref|YP_001293424.1|;gi|388542677|ref|YP_006299883.1|;gi|378407745|gb|AFB83306.1|;gi|823081462|gb|AKI28817.1|	hypothetical protein ORF017 [Pseudomonas phage 73]<>tail chaperonin [Pseudomonas phage vB_Pae-Kakheti25]<>tail chaperonin [Pseudomonas phage vB_Pae-Kakheti25]<>tail chaperonin [Stenotrophomonas phage vB_SmaS-DLP_1]
Loki_gp12	45.21	146	80	0	1	146	1	146	1e-40	141	gi|1015669860|gb|AMW36133.1|	tail chaperonine protein [Xanthomonas phage XAJ2]
Loki_gp12	48.63	146	66	3	3	146	4	142	2e-40	140	gi|658311475|ref|YP_009044352.1|;gi|656178017|emb|CDN96778.1|	tail chaperonin [Pseudomonas phage vB_PaeS_SCH_Ab26]<>tail chaperonin [Pseudomonas phage vB_PaeS_SCH_Ab26]
Loki_gp12	48.63	146	66	3	3	146	4	142	3e-40	140	gi|971766254|ref|YP_009219175.1|;gi|823081403|gb|AKI28759.1|	tail chaperonin [Stenotrophomonas phage vB_SmaS-DLP_2]<>tail chaperonin [Stenotrophomonas phage vB_SmaS-DLP_2]
Loki_gp12	48.28	145	66	3	3	145	4	141	2e-38	140	gi|388542678|ref|YP_006299882.1|;gi|378407746|gb|AFB83307.1|	tail chaperonin [Pseudomonas phage vB_Pae-Kakheti25]<>tail chaperonin [Pseudomonas phage vB_Pae-Kakheti25]
Loki_gp12	43.15	146	76	1	1	146	1	139	3e-35	127	gi|1046160781|ref|WP_065557711.1|;gi|1045578976|gb|OCG01736.1|	hypothetical protein [Gilliamella apicola]<>hypothetical protein A9G10_03180 [Gilliamella apicola]
Loki_gp12	39.73	146	81	2	1	146	1	139	2e-30	115	gi|1046296617|ref|WP_065638150.1|;gi|1045593517|gb|OCG15993.1|	hypothetical protein [Gilliamella apicola]<>hypothetical protein A9G24_01215 [Gilliamella apicola]
Loki_gp12	39.73	146	81	2	1	146	1	139	1e-29	113	gi|1129592414|ref|WP_075539114.1|;gi|1045609876|gb|OCG31614.1|	hypothetical protein [Gilliamella apicola]<>hypothetical protein A9G29_06210 [Gilliamella apicola]
Loki_gp12	38.46	143	85	1	1	140	1	143	6e-28	109	gi|971821769|ref|YP_009220351.1|;gi|827196349|gb|AKJ71375.1|	tail chaperonin protein [Achromobacter phage phiAxp-1]<>tail chaperonin protein [Achromobacter phage phiAxp-1]
Loki_gp12	39.04	146	82	2	1	146	1	139	8e-28	108	gi|1070101648|ref|YP_009285828.1|;gi|1026924161|gb|AND74867.1|	putative structural protein [Pseudomonas phage NP1]<>putative structural protein [Pseudomonas phage NP1]
Loki_gp12	39.04	146	82	2	1	146	1	139	2e-27	108	gi|936761764|gb|ALH23812.1|	putative structural protein [Pseudomonas phage PaMx25]
Loki_gp12	39.73	146	81	2	1	146	1	139	9e-26	104	gi|149408257|ref|YP_001294536.1|;gi|399529029|ref|YP_006561074.1|;gi|971762588|ref|YP_009215711.1|;gi|394778555|gb|AFN39638.1|;gi|471216574|gb|AGI11314.1|;gi|930349074|gb|ALF51520.1|;gi|1041568263|gb|ANO57385.1|	hypothetical protein ORF028 [Pseudomonas phage M6]<>hypothetical protein MP1412_67 [Pseudomonas phage MP1412]<>putative tail protein [Pseudomonas phage PAE1]<>hypothetical protein MP1412_67 [Pseudomonas phage MP1412]<>hypothetical protein LKO4_0067 [Pseudomonas phage LKO4]<>putative tail protein [Pseudomonas phage PAE1]<>hypothetical protein [Pseudomonas phage AN14]
Loki_gp12	39.73	146	81	2	1	146	1	139	1e-25	103	gi|162135149|ref|YP_001595890.1|;gi|161513996|emb|CAO77822.1|	hypothetical protein [Pseudomonas phage YuA]<>hypothetical protein [Pseudomonas phage YuA]
Loki_gp12	41.1	146	73	4	2	146	3	136	5e-21	91.7	gi|496231335|ref|WP_008945370.1|;gi|407202265|gb|EKE72258.1|	hypothetical protein [Oceanibaculum indicum]<>hypothetical protein P24_13830 [Oceanibaculum indicum P24]
Loki_gp12	34.9	149	80	5	1	146	1	135	8e-15	75.9	gi|503868116|ref|WP_014102110.1|;gi|347589845|gb|AEP08887.1|	hypothetical protein [Micavibrio aeruginosavorus]<>putative uncharacterized protein gp67 [Micavibrio aeruginosavorus ARL-13]
Loki_gp12	32.47	154	89	6	1	146	1	147	5e-08	58.2	gi|764162039|ref|YP_009126435.1|;gi|746947757|gb|AJD83169.1|	tail protein [Paracoccus phage vB_PmaS_IMEP1]<>tail protein [Paracoccus phage vB_PmaS_IMEP1]
Loki_gp12	27.03	148	93	4	7	146	11	151	8e-07	55.1	gi|428782125|ref|YP_007111886.1|;gi|410809492|gb|AFV81272.1|	hypothetical protein MAR10_039 [Vibrio phage vB_VpaS_MAR10]<>hypothetical protein MAR10_039 [Vibrio phage vB_VpaS_MAR10]
Loki_gp12	29.55	88	51	2	35	116	28	110	7	36.2	gi|857289831|gb|AKO61486.1|	hypothetical protein APCEc03_085 [Escherichia phage APCEc03]
Loki_gp13	100	262	0	0	1	262	1	262	0	540	gi|949419303|emb|CUS06473.1|	putative tail assembly chaperone [unclassified Siphoviridae]
Loki_gp13	100	146	0	0	1	146	1	146	9e-102	301	gi|949419304|emb|CUS06474.1|	putative tail assembly chaperone [unclassified Siphoviridae]
Loki_gp13	56.91	246	97	3	2	245	3	241	3e-89	274	gi|399528756|ref|YP_006560769.1|;gi|371767592|gb|AEX56126.1|	tail protein [Burkholderia phage KL1]<>tail protein [Burkholderia phage KL1]
Loki_gp13	51.91	262	117	3	3	262	4	258	9e-88	270	gi|388542678|ref|YP_006299882.1|;gi|378407746|gb|AFB83307.1|	tail chaperonin [Pseudomonas phage vB_Pae-Kakheti25]<>tail chaperonin [Pseudomonas phage vB_Pae-Kakheti25]
Loki_gp13	68.49	146	46	0	1	146	14	159	2e-66	212	gi|589892170|ref|YP_009008535.1|;gi|583926724|gb|AHI60030.1|	putative tail chaperonin protein [Acinetobacter phage IME_AB3]<>putative tail chaperonin protein [Acinetobacter phage IME_AB3]
Loki_gp13	56.16	146	57	2	1	146	1	139	3e-47	162	gi|985760162|ref|YP_009225683.1|;gi|910307319|gb|AKU43035.1|	tail chaperonin [Rhodobacter phage RcTitan]<>tail chaperonin [Rhodobacter phage RcTitan]
Loki_gp13	56.16	146	57	2	1	146	1	139	9e-47	161	gi|910307502|gb|AKU43201.1|	tail chaperonin [Rhodobacter phage RcSpartan]
Loki_gp13	53.74	147	59	3	2	146	3	142	3e-43	152	gi|399528732|ref|YP_006560770.1|;gi|371767568|gb|AEX56102.1|	tail protein [Burkholderia phage KL1]<>tail protein [Burkholderia phage KL1]
Loki_gp13	51.37	146	62	3	3	146	4	142	3e-41	147	gi|971751686|ref|YP_009205613.1|;gi|936761524|gb|ALH23583.1|	putative virion structural protein [Pseudomonas phage PaMx42]<>putative virion structural protein [Pseudomonas phage PaMx42]
Loki_gp13	68.75	96	30	0	155	250	1	96	4e-40	143	gi|589892169|ref|YP_009008534.1|;gi|583926723|gb|AHI60029.1|	putative tail chaperonin protein [Acinetobacter phage IME_AB3]<>putative tail chaperonin protein [Acinetobacter phage IME_AB3]
Loki_gp13	49.32	146	65	3	3	146	4	142	2e-39	142	gi|148912845|ref|YP_001293424.1|;gi|388542677|ref|YP_006299883.1|;gi|378407745|gb|AFB83306.1|;gi|823081462|gb|AKI28817.1|	hypothetical protein ORF017 [Pseudomonas phage 73]<>tail chaperonin [Pseudomonas phage vB_Pae-Kakheti25]<>tail chaperonin [Pseudomonas phage vB_Pae-Kakheti25]<>tail chaperonin [Stenotrophomonas phage vB_SmaS-DLP_1]
Loki_gp13	49.32	146	65	3	3	146	4	142	2e-39	142	gi|701904481|gb|AIW01682.1|	hypothetical protein vB_Pae_PS9N_00031 [Pseudomonas phage vB_Pae_PS9N]
Loki_gp13	48.63	146	66	3	3	146	4	142	9e-39	141	gi|658311475|ref|YP_009044352.1|;gi|656178017|emb|CDN96778.1|	tail chaperonin [Pseudomonas phage vB_PaeS_SCH_Ab26]<>tail chaperonin [Pseudomonas phage vB_PaeS_SCH_Ab26]
Loki_gp13	45.21	146	80	0	1	146	1	146	9e-39	141	gi|1015669860|gb|AMW36133.1|	tail chaperonine protein [Xanthomonas phage XAJ2]
Loki_gp13	48.63	146	66	3	3	146	4	142	1e-38	140	gi|971766254|ref|YP_009219175.1|;gi|823081403|gb|AKI28759.1|	tail chaperonin [Stenotrophomonas phage vB_SmaS-DLP_2]<>tail chaperonin [Stenotrophomonas phage vB_SmaS-DLP_2]
Loki_gp13	56.19	105	46	0	151	255	1	105	6e-34	127	gi|148912846|ref|YP_001293425.1|;gi|823081469|gb|AKI28824.1|	hypothetical protein ORF018 [Pseudomonas phage 73]<>tail chaperonin [Stenotrophomonas phage vB_SmaS-DLP_1]
Loki_gp13	55.24	105	47	0	151	255	1	105	2e-33	126	gi|658311476|ref|YP_009044353.1|;gi|971766260|ref|YP_009219176.1|;gi|656178018|emb|CDN96779.1|;gi|823081409|gb|AKI28765.1|	tail chaperonin [Pseudomonas phage vB_PaeS_SCH_Ab26]<>tail chaperonin [Stenotrophomonas phage vB_SmaS-DLP_2]<>tail chaperonin [Pseudomonas phage vB_PaeS_SCH_Ab26]<>tail chaperonin [Stenotrophomonas phage vB_SmaS-DLP_2]
Loki_gp13	43.15	146	76	1	1	146	1	139	2e-33	127	gi|1046160781|ref|WP_065557711.1|;gi|1045578976|gb|OCG01736.1|	hypothetical protein [Gilliamella apicola]<>hypothetical protein A9G10_03180 [Gilliamella apicola]
Loki_gp13	39.73	146	81	2	1	146	1	139	9e-29	115	gi|1046296617|ref|WP_065638150.1|;gi|1045593517|gb|OCG15993.1|	hypothetical protein [Gilliamella apicola]<>hypothetical protein A9G24_01215 [Gilliamella apicola]
Loki_gp13	39.73	146	81	2	1	146	1	139	7e-28	113	gi|1129592414|ref|WP_075539114.1|;gi|1045609876|gb|OCG31614.1|	hypothetical protein [Gilliamella apicola]<>hypothetical protein A9G29_06210 [Gilliamella apicola]
Loki_gp13	39.04	146	82	2	1	146	1	139	3e-26	108	gi|1070101648|ref|YP_009285828.1|;gi|1026924161|gb|AND74867.1|	putative structural protein [Pseudomonas phage NP1]<>putative structural protein [Pseudomonas phage NP1]
Loki_gp13	38.46	143	85	1	1	140	1	143	4e-26	108	gi|971821769|ref|YP_009220351.1|;gi|827196349|gb|AKJ71375.1|	tail chaperonin protein [Achromobacter phage phiAxp-1]<>tail chaperonin protein [Achromobacter phage phiAxp-1]
Loki_gp13	39.04	146	82	2	1	146	1	139	6e-26	108	gi|936761764|gb|ALH23812.1|	putative structural protein [Pseudomonas phage PaMx25]
Loki_gp13	39.73	146	81	2	1	146	1	139	5e-24	103	gi|149408257|ref|YP_001294536.1|;gi|399529029|ref|YP_006561074.1|;gi|971762588|ref|YP_009215711.1|;gi|394778555|gb|AFN39638.1|;gi|471216574|gb|AGI11314.1|;gi|930349074|gb|ALF51520.1|;gi|1041568263|gb|ANO57385.1|	hypothetical protein ORF028 [Pseudomonas phage M6]<>hypothetical protein MP1412_67 [Pseudomonas phage MP1412]<>putative tail protein [Pseudomonas phage PAE1]<>hypothetical protein MP1412_67 [Pseudomonas phage MP1412]<>hypothetical protein LKO4_0067 [Pseudomonas phage LKO4]<>putative tail protein [Pseudomonas phage PAE1]<>hypothetical protein [Pseudomonas phage AN14]
Loki_gp13	39.73	146	81	2	1	146	1	139	5e-24	103	gi|162135149|ref|YP_001595890.1|;gi|161513996|emb|CAO77822.1|	hypothetical protein [Pseudomonas phage YuA]<>hypothetical protein [Pseudomonas phage YuA]
Loki_gp13	51.69	89	43	0	169	257	1	89	3e-22	97.1	gi|971751685|ref|YP_009205614.1|;gi|936761523|gb|ALH23582.1|	hypothetical protein PaMx42_19 [Pseudomonas phage PaMx42]<>hypothetical protein PaMx42_19 [Pseudomonas phage PaMx42]
Loki_gp13	45.83	96	52	0	163	258	10	105	3e-20	92.8	gi|985760163|ref|YP_009225684.1|;gi|910307320|gb|AKU43036.1|;gi|910307503|gb|AKU43202.1|	tail chaperonin [Rhodobacter phage RcTitan]<>tail chaperonin [Rhodobacter phage RcTitan]<>tail chaperonin [Rhodobacter phage RcSpartan]
Loki_gp13	41.1	146	73	4	2	146	3	136	1e-19	91.3	gi|496231335|ref|WP_008945370.1|;gi|407202265|gb|EKE72258.1|	hypothetical protein [Oceanibaculum indicum]<>hypothetical protein P24_13830 [Oceanibaculum indicum P24]
Loki_gp13	38.04	92	56	1	158	248	5	96	2e-14	76.6	gi|146329926|ref|YP_001210234.1|;gi|145321102|gb|ABP63585.1|	BcepGomrgp14 [Burkholderia phage BcepGomr]<>BcepGomrgp14 [Burkholderia phage BcepGomr]
Loki_gp13	34.9	149	80	5	1	146	1	135	2e-13	75.1	gi|503868116|ref|WP_014102110.1|;gi|347589845|gb|AEP08887.1|	hypothetical protein [Micavibrio aeruginosavorus]<>putative uncharacterized protein gp67 [Micavibrio aeruginosavorus ARL-13]
Loki_gp13	43.43	99	55	1	158	256	3	100	3e-13	73.9	gi|1046160782|ref|WP_065557712.1|;gi|1045578977|gb|OCG01737.1|	hypothetical protein [Gilliamella apicola]<>hypothetical protein A9G10_03185 [Gilliamella apicola]
Loki_gp13	42.11	95	55	0	163	257	7	101	2e-12	71.2	gi|1129592413|ref|WP_075539113.1|;gi|1045609875|gb|OCG31613.1|	hypothetical protein [Gilliamella apicola]<>hypothetical protein A9G29_06205 [Gilliamella apicola]
Loki_gp13	43.53	85	48	0	173	257	7	91	1e-11	69.3	gi|1046296618|ref|WP_065638151.1|;gi|1045593518|gb|OCG15994.1|	hypothetical protein [Gilliamella apicola]<>hypothetical protein A9G24_01220 [Gilliamella apicola]
Loki_gp13	45.83	72	38	1	185	255	1	72	8e-11	66.6	gi|936761763|gb|ALH23811.1|	hypothetical protein PaMx25_19 [Pseudomonas phage PaMx25]
Loki_gp13	42.17	83	48	0	174	256	6	88	4e-10	64.7	gi|149408258|ref|YP_001294537.1|	hypothetical protein ORF029 [Pseudomonas phage M6]
Loki_gp13	40.96	83	49	0	174	256	6	88	1e-09	63.5	gi|471216575|gb|AGI11315.1|;gi|1041568264|gb|ANO57386.1|	hypothetical protein LKO4_0067.1 [Pseudomonas phage LKO4]<>hypothetical protein [Pseudomonas phage AN14]
Loki_gp13	34.67	75	49	0	172	246	10	84	4e-09	62	gi|971821770|ref|YP_009220352.1|;gi|827196350|gb|AKJ71376.1|	tail chaperonin [Achromobacter phage phiAxp-1]<>tail chaperonin [Achromobacter phage phiAxp-1]
Loki_gp13	41.03	78	46	0	169	246	1	78	2e-08	60.8	gi|971747953|ref|YP_009201751.1|;gi|746947433|gb|AJD82850.1|	hypothetical protein JWAP_00017 [Achromobacter phage 83-24]<>hypothetical protein JWAP_00017 [Achromobacter phage 83-24]
Loki_gp13	34.02	97	62	2	151	245	1	97	2e-08	60.8	gi|1124414155|ref|WP_074701703.1|	hypothetical protein [Nitrosomonas ureae]
Loki_gp13	32.47	154	89	6	1	146	1	147	3e-07	58.5	gi|764162039|ref|YP_009126435.1|;gi|746947757|gb|AJD83169.1|	tail protein [Paracoccus phage vB_PmaS_IMEP1]<>tail protein [Paracoccus phage vB_PmaS_IMEP1]
Loki_gp13	43.55	62	34	1	195	255	2	63	2e-06	53.9	gi|1070101649|ref|YP_009285829.1|;gi|1026924162|gb|AND74868.1|	hypothetical protein [Pseudomonas phage NP1]<>hypothetical protein [Pseudomonas phage NP1]
Loki_gp13	31.33	83	57	0	175	257	1	83	7e-06	53.5	gi|590121799|dbj|BAO53120.1|	hypothetical protein KPP23_093 [Pseudomonas phage KPP23]
Loki_gp13	27.03	148	93	4	7	146	11	151	8e-06	54.7	gi|428782125|ref|YP_007111886.1|;gi|410809492|gb|AFV81272.1|	hypothetical protein MAR10_039 [Vibrio phage vB_VpaS_MAR10]<>hypothetical protein MAR10_039 [Vibrio phage vB_VpaS_MAR10]
Loki_gp13	31.96	97	62	2	161	257	13	105	8e-05	50.8	gi|764162040|ref|YP_009126436.1|;gi|746947758|gb|AJD83170.1|	tail chaperonin [Paracoccus phage vB_PmaS_IMEP1]<>tail chaperonin [Paracoccus phage vB_PmaS_IMEP1]
Loki_gp13	32.05	78	53	0	175	252	3	80	0.0001	50.1	gi|1015669861|gb|AMW36134.1|	putative tail chaperonine protein [Xanthomonas phage XAJ2]
Loki_gp13	29.76	84	53	2	175	252	1	84	0.03	43.1	gi|1011013062|ref|WP_061969672.1|;gi|946351665|gb|KRE02599.1|	hypothetical protein [Bosea sp. Root670]<>hypothetical protein ASE61_15085 [Bosea sp. Root670]
Loki_gp13	31.46	89	54	3	174	259	8	92	3	37.7	gi|519028958|ref|WP_020184833.1|	hypothetical protein [Methylopila sp. 73B]
Loki_gp14	100	145	0	0	1	145	1	145	3e-99	290	gi|949419305|emb|CUS06475.1|	putative tail completion protein [unclassified Siphoviridae]
Loki_gp14	83.92	143	23	0	3	145	4	146	8e-85	253	gi|589892168|ref|YP_009008533.1|;gi|583926722|gb|AHI60028.1|	putative tail completion protein [Acinetobacter phage IME_AB3]<>putative tail completion protein [Acinetobacter phage IME_AB3]
Loki_gp14	59.29	140	57	0	3	142	4	143	7e-51	167	gi|148912847|ref|YP_001293426.1|;gi|388542679|ref|YP_006299884.1|;gi|658311477|ref|YP_009044354.1|;gi|971766253|ref|YP_009219177.1|;gi|378407747|gb|AFB83308.1|;gi|656178019|emb|CDN96780.1|;gi|701904482|gb|AIW01683.1|;gi|823081402|gb|AKI28758.1|;gi|823081461|gb|AKI28816.1|	hypothetical protein ORF019 [Pseudomonas phage 73]<>putative tail completion protein [Pseudomonas phage vB_Pae-Kakheti25]<>putative tail completion protein [Pseudomonas phage vB_PaeS_SCH_Ab26]<>hypothetical protein [Stenotrophomonas phage vB_SmaS-DLP_2]<>putative tail completion protein [Pseudomonas phage vB_Pae-Kakheti25]<>putative tail completion protein [Pseudomonas phage vB_PaeS_SCH_Ab26]<>hy…
Loki_gp14	58.87	141	56	2	3	142	4	143	1e-48	162	gi|399528733|ref|YP_006560771.1|;gi|371767569|gb|AEX56103.1|	hypothetical protein KL1_00020 [Burkholderia phage KL1]<>hypothetical protein KL1_00020 [Burkholderia phage KL1]
Loki_gp14	56.64	143	61	1	1	142	1	143	6e-47	157	gi|971751684|ref|YP_009205615.1|;gi|936761522|gb|ALH23581.1|	virion structural protein [Pseudomonas phage PaMx42]<>virion structural protein [Pseudomonas phage PaMx42]
Loki_gp14	48.59	142	73	0	1	142	1	142	4e-38	135	gi|1015669862|gb|AMW36135.1|	putative tail completion protein [Xanthomonas phage XAJ2]
Loki_gp14	50.35	143	71	0	1	143	1	143	1e-37	134	gi|971821771|ref|YP_009220353.1|;gi|827196351|gb|AKJ71377.1|	hypothetical protein RU58_00052 [Achromobacter phage phiAxp-1]<>hypothetical protein RU58_00052 [Achromobacter phage phiAxp-1]
Loki_gp14	41.67	144	83	1	1	143	1	144	1e-26	105	gi|910307504|gb|AKU43203.1|	hypothetical protein RCSPARTAN_20 [Rhodobacter phage RcSpartan]
Loki_gp14	41.67	144	83	1	1	143	1	144	1e-26	105	gi|985760164|ref|YP_009225685.1|;gi|910307321|gb|AKU43037.1|	hypothetical protein RCTITAN_20 [Rhodobacter phage RcTitan]<>hypothetical protein RCTITAN_20 [Rhodobacter phage RcTitan]
Loki_gp14	39.31	145	87	1	1	145	1	144	3e-21	92.4	gi|764162041|ref|YP_009126437.1|;gi|746947759|gb|AJD83171.1|	hypothetical protein [Paracoccus phage vB_PmaS_IMEP1]<>hypothetical protein [Paracoccus phage vB_PmaS_IMEP1]
Loki_gp14	38.17	131	79	2	1	130	1	130	3e-18	84.7	gi|149408259|ref|YP_001294538.1|;gi|162135150|ref|YP_001595891.1|;gi|399529030|ref|YP_006561075.1|;gi|971762590|ref|YP_009215713.1|;gi|161513997|emb|CAO77823.1|;gi|394778556|gb|AFN39639.1|;gi|471216576|gb|AGI11316.1|;gi|930349076|gb|ALF51522.1|	hypothetical protein ORF030 [Pseudomonas phage M6]<>hypothetical protein [Pseudomonas phage YuA]<>hypothetical protein MP1412_68 [Pseudomonas phage MP1412]<>putative structural protein [Pseudomonas phage PAE1]<>hypothetical protein [Pseudomonas phage YuA]<>hypothetical protein MP1412_68 [Pseudomonas phage MP1412]<>phage morphogenesis protein [Pseudomonas phage LKO4]<>putative structural protein […
Loki_gp14	36.88	141	89	0	1	141	1	141	4e-18	84.7	gi|62327187|ref|YP_224005.1|;gi|50059505|gb|AAT69477.1|	gp81 [Phage phiJL001]<>gp81 [Phage phiJL001]
Loki_gp14	36.36	132	75	2	1	132	1	123	4e-18	84.3	gi|936761762|gb|ALH23810.1|	virion structural protein [Pseudomonas phage PaMx25]
Loki_gp14	36.09	133	74	2	1	132	1	123	1e-17	83.2	gi|1070101650|ref|YP_009285830.1|;gi|1026924163|gb|AND74869.1|	virion structural protein [Pseudomonas phage NP1]<>virion structural protein [Pseudomonas phage NP1]
Loki_gp14	35.97	139	79	3	3	141	9	137	2e-17	83.2	gi|971741695|ref|YP_009196205.1|;gi|746947368|gb|AJD82786.1|	hypothetical protein JWX_00020 [Achromobacter phage JWX]<>hypothetical protein JWX_00020 [Achromobacter phage JWX]
Loki_gp14	33.58	137	79	4	6	141	12	137	8e-14	73.2	gi|971747954|ref|YP_009201752.1|;gi|746947434|gb|AJD82851.1|	hypothetical protein JWAP_00018 [Achromobacter phage 83-24]<>hypothetical protein JWAP_00018 [Achromobacter phage 83-24]
Loki_gp14	33.57	143	93	1	1	141	1	143	1e-13	72.8	gi|653311355|ref|WP_027486552.1|	hypothetical protein [Rhizobium undicola]
Loki_gp14	36.09	133	84	1	1	132	1	133	4e-13	71.6	gi|1011715718|ref|WP_062559555.1|;gi|958298801|gb|ALQ51922.1|;gi|1088848741|emb|SDT96555.1|	hypothetical protein [Nitrosomonas ureae]<>hypothetical protein ATY38_12240 [Nitrosomonas ureae]<>hypothetical protein SAMN05216406_11420 [Nitrosomonas ureae]
Loki_gp14	32.79	122	71	2	5	125	1	112	7e-13	70.5	gi|746091708|ref|WP_039158412.1|;gi|742700635|gb|KIC12861.1|	hypothetical protein [Leisingera sp. ANG-M1]<>hypothetical protein RA19_00180 [Leisingera sp. ANG-M1]
Loki_gp14	31.47	143	96	1	1	141	1	143	5e-12	68.6	gi|947663167|ref|WP_056325882.1|;gi|945479210|gb|KQV34803.1|;gi|946272775|gb|KRD24136.1|	MULTISPECIES: hypothetical protein [Rhizobium]<>hypothetical protein ASC86_14945 [Rhizobium sp. Root1212]<>hypothetical protein ASE37_14935 [Rhizobium sp. Root268]
Loki_gp14	33.06	124	72	2	7	129	3	116	5e-10	63.2	gi|499857421|ref|WP_011538155.1|;gi|99036931|gb|ABF63543.1|	hypothetical protein [Ruegeria sp. TM1040]<>phage-related conserved hypothetical protein [Ruegeria sp. TM1040]
Loki_gp14	29.46	129	83	2	14	141	10	131	1e-09	62.4	gi|146329927|ref|YP_001210235.1|;gi|145321103|gb|ABP63586.1|	BcepGomrgp15 [Burkholderia phage BcepGomr]<>BcepGomrgp15 [Burkholderia phage BcepGomr]
Loki_gp14	30.58	121	74	2	6	126	3	113	1e-09	62	gi|495335958|ref|WP_008060694.1|;gi|333443949|gb|EGK71906.1|	hypothetical protein [Methyloversatilis universalis]<>hypothetical protein METUNv1_01684 [Methyloversatilis universalis FAM5]
Loki_gp14	30.4	125	78	1	5	129	1	116	3e-09	61.2	gi|929044845|ref|WP_054067849.1|	hypothetical protein [Comamonas kerstersii]
Loki_gp14	33.93	112	73	1	18	129	15	125	6e-09	60.5	gi|590121795|dbj|BAO53116.1|	hypothetical protein KPP23_089 [Pseudomonas phage KPP23]
Loki_gp14	32.48	117	76	1	16	132	14	127	7e-09	60.1	gi|891439060|gb|AKQ75855.1|	hypothetical protein RDJLphi2_gp65 [Roseobacter phage RDJL Phi 2]
Loki_gp14	33.33	111	53	3	29	132	28	124	8e-09	60.1	gi|503868119|ref|WP_014102113.1|;gi|347589848|gb|AEP08890.1|	hypothetical protein [Micavibrio aeruginosavorus]<>putative uncharacterized protein [Micavibrio aeruginosavorus ARL-13]
Loki_gp14	31.67	120	71	2	7	125	3	112	4e-08	58.2	gi|749548733|ref|WP_040182278.1|;gi|749096588|gb|KII11764.1|	hypothetical protein [Phaeobacter sp. S60]<>hypothetical protein OO25_19660 [Phaeobacter sp. S60]
Loki_gp14	28.78	139	86	3	7	141	12	141	5e-08	58.2	gi|742884409|ref|WP_039012873.1|	hypothetical protein [Pseudomonas brassicacearum]
Loki_gp14	31.3	131	77	4	11	140	9	127	6e-08	57.8	gi|1094985311|emb|SEL12094.1|	hypothetical protein SAMN05216359_105271 [Roseateles sp. YR242]
Loki_gp14	29.13	127	77	2	3	129	6	119	7e-08	57.4	gi|917737681|ref|WP_052251867.1|	hypothetical protein [Allofrancisella guangzhouensis]
Loki_gp14	33.33	117	75	1	16	132	14	127	9e-08	57.4	gi|331028130|ref|YP_004421844.1|;gi|301341593|gb|ADK73477.1|	hypothetical protein RDJLphi1_gp76 [Roseobacter phage RDJL Phi 1]<>hypothetical protein RDJLphi1_gp76 [Roseobacter phage RDJL Phi 1]
Loki_gp14	30.83	120	74	2	7	126	16	126	3e-07	56.2	gi|1086004725|emb|SDU02280.1|	hypothetical protein SAMN04490196_0117 [Pseudomonas moraviensis]
Loki_gp14	30.19	106	63	2	22	126	31	126	5e-07	55.8	gi|1087647226|emb|SDE54542.1|	Bacteriophage HK97-gp10, putative tail-component [Myxococcus virescens]
Loki_gp14	28.57	126	79	2	5	129	1	116	5e-07	55.1	gi|806713380|gb|KKC39508.1|	hypothetical protein WH87_04750 [Devosia epidermidihirudinis]
Loki_gp14	27.69	130	78	4	1	129	1	115	6e-07	55.1	gi|1000077350|gb|KXJ45889.1|	hypothetical protein AXW11_12430 [Marinobacter sp. Hex_13]
Loki_gp14	29.73	111	61	2	14	124	20	113	7e-07	54.7	gi|755702990|ref|WP_042559971.1|;gi|749475459|emb|CEL30210.1|	hypothetical protein [Pseudomonas fluorescens]<>hypothetical protein SRM1_03568 [Pseudomonas fluorescens]
Loki_gp14	33.65	104	54	4	29	129	25	116	7e-07	54.7	gi|509420192|gb|AGN30435.1|	hypothetical protein SXAG_00154 [Synechococcus phage S-CBS4]
Loki_gp14	35.87	92	45	3	29	117	26	106	8e-07	55.1	gi|820875045|ref|WP_046787132.1|	hypothetical protein [Pseudomonas putida]
Loki_gp14	31.58	95	56	2	29	123	8	93	8e-07	54.3	gi|928321036|gb|KPB83809.1|	Uncharacterized protein AC505_1141 [Pseudomonas syringae pv. maculicola]
Loki_gp14	31.58	95	56	1	29	123	26	111	9e-07	54.3	gi|950597926|ref|WP_057458368.1|;gi|940243562|gb|KPY52812.1|	hypothetical protein [Pseudomonas syringae]<>Uncharacterized protein ALO46_00039 [Pseudomonas syringae pv. solidagae]
Loki_gp14	33.64	107	61	2	33	137	41	139	1e-06	54.7	gi|451939147|gb|AGF89325.1|;gi|451939381|gb|AGF89544.1|	hypothetical protein SP062_00225 [Salmonella phage FSL SP-062]<>hypothetical protein SP069_00225 [Salmonella phage SP069]
Loki_gp14	31.58	95	56	1	29	123	26	111	1e-06	53.9	gi|940421429|ref|WP_055010108.1|;gi|940031847|gb|KPW56666.1|	hypothetical protein [Pseudomonas caricapapayae]<>putative prophage PSSB64-02, Orf21 [Pseudomonas caricapapayae]
Loki_gp14	31.58	95	56	1	29	123	26	111	1e-06	53.9	gi|330940130|gb|EGH43301.1|	hypothetical protein PSYPI_13266 [Pseudomonas syringae pv. pisi str. 1704B]
Loki_gp14	35.16	91	50	2	29	119	26	107	1e-06	53.9	gi|948179584|ref|WP_056837585.1|;gi|945004097|gb|KQQ60154.1|	hypothetical protein [Pseudomonas sp. Leaf127]<>hypothetical protein ASF84_05460 [Pseudomonas sp. Leaf127]
Loki_gp14	28.24	131	82	3	5	134	6	125	1e-06	53.9	gi|916241048|ref|WP_050980187.1|	hypothetical protein [Ensifer sojae]
Loki_gp14	32.26	93	50	2	29	119	26	107	2e-06	53.9	gi|639536335|ref|WP_024685102.1|	hypothetical protein [Pseudomonas syringae]
Loki_gp14	31.58	95	56	2	29	123	26	111	2e-06	53.5	gi|494453808|ref|WP_007244248.1|;gi|213927689|gb|EEB61236.1|;gi|695905837|gb|KGK96154.1|	hypothetical protein [Pseudomonas syringae group genomosp. 3]<>conserved hypothetical protein [Pseudomonas syringae pv. tomato T1]<>phage protein [Pseudomonas syringae pv. tomato]
Loki_gp14	31.45	124	62	3	29	138	28	142	2e-06	54.3	gi|1042786569|ref|WP_065308953.1|;gi|1041601079|gb|OBV38056.1|	hypothetical protein [Janthinobacterium sp. S3-2]<>hypothetical protein ASR47_10059 [Janthinobacterium sp. S3-2]
Loki_gp14	34.29	105	63	2	33	137	42	140	3e-06	53.5	gi|1131741164|gb|APU92796.1|;gi|1131741256|gb|APU92887.1|	hypothetical protein CPTSasha_40 [Salmonella phage vB_SenS_Sasha]<>hypothetical protein CPTSergei_50 [Salmonella phage vB_SenS_Sergei]
Loki_gp14	30.53	95	57	1	29	123	26	111	3e-06	53.1	gi|950524085|ref|WP_057407064.1|;gi|970582886|gb|ALU60881.1|	hypothetical protein [Pseudomonas syringae]<>hypothetical protein ACA40_13805 [Pseudomonas syringae pv. lapsa]
Loki_gp14	28.03	132	78	5	5	125	1	126	3e-06	53.5	gi|550936152|ref|WP_022684557.1|	hypothetical protein [Sphingobium sp. YL23]
Loki_gp14	28.78	139	86	2	7	141	18	147	3e-06	53.5	gi|1086034177|emb|SDT97670.1|	hypothetical protein SAMN05216237_0984 [Pseudomonas yamanorum]
Loki_gp14	28.57	119	73	2	11	129	8	114	3e-06	53.1	gi|827202401|ref|WP_047194614.1|;gi|826170608|gb|AKJ28838.1|	hypothetical protein [[Polyangium] brachysporum]<>phage protein [[Polyangium] brachysporum]
Loki_gp14	31.62	117	58	3	11	126	17	112	4e-06	53.1	gi|947373045|ref|WP_056039144.1|;gi|943684354|gb|KQI67043.1|	hypothetical protein [Loktanella sp. 3ANDIMAR09]<>hypothetical protein AN189_17625 [Loktanella sp. 3ANDIMAR09]
Loki_gp14	31.58	95	56	2	29	123	26	111	4e-06	52.8	gi|490553033|ref|WP_004418140.1|;gi|443284279|gb|ELS43284.1|	hypothetical protein [Pseudomonas syringae]<>Prophage PSSB64-03, Orf21 [Pseudomonas syringae pv. syringae B64]
Loki_gp14	32	100	58	2	33	130	41	132	5e-06	52.8	gi|712914000|ref|YP_009101214.1|;gi|645494971|gb|AIB07047.1|	hypothetical protein 9NA_044 [Salmonella phage 9NA]<>hypothetical protein 9NA_044 [Salmonella phage 9NA]
Loki_gp14	26.28	137	78	3	5	126	1	129	6e-06	52.8	gi|489390990|ref|WP_003297545.1|;gi|582951228|gb|EWC39548.1|	hypothetical protein [Pseudomonas stutzeri]<>hypothetical protein B597_019350 [Pseudomonas stutzeri KOS6]
Loki_gp14	30.21	96	54	2	29	122	26	110	6e-06	52.4	gi|929529287|ref|WP_054070252.1|;gi|928333356|gb|KPB95749.1|	hypothetical protein [Pseudomonas syringae group genomosp. 3]<>Uncharacterized protein AC503_3073 [Pseudomonas syringae pv. maculicola]
Loki_gp14	32.04	103	59	2	28	129	3	95	6e-06	52	gi|919170722|ref|WP_052726353.1|	hypothetical protein [Devosia epidermidihirudinis]
Loki_gp14	34.02	97	51	2	29	123	27	112	7e-06	52	gi|984662800|ref|WP_060766413.1|;gi|984320253|gb|KWV69646.1|	hypothetical protein [Pseudomonas fluorescens]<>hypothetical protein PFL603g_06398 [Pseudomonas fluorescens]
Loki_gp14	28.78	139	86	2	7	141	12	141	7e-06	52.4	gi|734870932|ref|WP_034120632.1|	hypothetical protein [Pseudomonas fluorescens]
Loki_gp14	31.73	104	68	1	29	132	27	127	1e-05	52	gi|672581468|gb|KFH18433.1|	hypothetical protein IB60_17140 [Brucella abortus LMN1]
Loki_gp14	32.73	110	61	2	14	123	11	107	1e-05	51.6	gi|1094567649|emb|SEO13708.1|	hypothetical protein SAMN04487817_101585 [Acinetobacter sp. yr461]
Loki_gp14	29.29	140	85	3	7	141	18	148	1e-05	52	gi|492248046|ref|WP_005789665.1|;gi|388011027|gb|EIK72214.1|	hypothetical protein [Pseudomonas synxantha]<>hypothetical protein PseBG33_3643 [Pseudomonas synxantha BG33R]
Loki_gp14	28.06	139	87	2	7	141	12	141	1e-05	51.6	gi|1051715482|ref|WP_065932977.1|	hypothetical protein [Pseudomonas sp. 28 E 9]
Loki_gp14	28.06	139	87	2	7	141	16	145	1e-05	51.6	gi|1048572505|emb|CRM04841.1|	hypothetical protein [Pseudomonas sp. 28 E 9]
Loki_gp14	39.47	76	37	2	50	125	60	126	1e-05	52	gi|1094086452|ref|WP_071077688.1|	hypothetical protein [Janthinobacterium lividum]
Loki_gp14	31.67	120	67	3	29	138	28	142	1e-05	52	gi|1080023875|ref|WP_070313326.1|;gi|1078242656|gb|OEZ92197.1|	hypothetical protein [Janthinobacterium sp. HH107]<>hypothetical protein JAB9_47640 [Janthinobacterium sp. HH107]
Loki_gp14	32.63	95	55	2	29	123	27	112	1e-05	51.2	gi|763411821|ref|WP_044268205.1|;gi|666375448|gb|KEY45380.1|	hypothetical protein [Citrobacter amalonaticus]<>hypothetical protein DQ02_21155 [Citrobacter amalonaticus]
Loki_gp14	29.41	119	72	3	7	125	1	107	2e-05	51.2	gi|1088700378|ref|WP_070414901.1|	hypothetical protein [Pseudomonas sp. BS-2016]
Loki_gp14	30	120	75	1	7	126	12	122	2e-05	51.2	gi|1120933939|ref|WP_073453024.1|;gi|1113036460|gb|OJT30342.1|	hypothetical protein [Pseudomonas sp. FSL W5-0203]<>hypothetical protein BOP96_12385 [Pseudomonas sp. FSL W5-0203]
Loki_gp14	28.57	140	86	3	7	141	18	148	3e-05	51.2	gi|492240920|ref|WP_005785661.1|;gi|388007817|gb|EIK69083.1|	hypothetical protein [Pseudomonas synxantha]<>hypothetical protein PseBG33_1373 [Pseudomonas synxantha BG33R]
Loki_gp14	33.33	99	49	3	29	123	27	112	3e-05	50.4	gi|985530041|ref|WP_060816048.1|;gi|985312155|gb|KWZ96595.1|;gi|985316298|gb|KXA00649.1|;gi|987330627|gb|KXB44270.1|;gi|1081369939|gb|OFV07291.1|	MULTISPECIES: hypothetical protein [Enterobacteriaceae]<>hypothetical protein HMPREF3220_03530 [Citrobacter koseri]<>hypothetical protein HMPREF3207_03306 [Citrobacter koseri]<>hypothetical protein HMPREF0208_02013 [Citrobacter koseri]<>hypothetical protein HMPREF3126_21415 [Salmonella sp. HMSC13B08]
Loki_gp14	30.19	106	65	1	18	123	21	117	3e-05	50.8	gi|1035781729|ref|WP_064590606.1|;gi|1033864256|gb|ANI04161.1|	hypothetical protein [Pseudomonas putida]<>hypothetical protein A210_16390 [Pseudomonas putida SJTE-1]
Loki_gp14	28.43	102	64	2	29	130	27	119	3e-05	50.4	gi|1085885852|emb|SDT24361.1|	hypothetical protein SAMN05216585_5210 [Pseudomonas chlororaphis]
Loki_gp14	38.37	86	42	3	41	125	37	112	3e-05	50.4	gi|1125679096|ref|WP_075040151.1|	hypothetical protein [Acinetobacter radioresistens]
Loki_gp14	29.9	97	55	2	29	123	26	111	3e-05	50.4	gi|983303311|ref|WP_060489621.1|;gi|1034240829|gb|ANI33865.1|	MULTISPECIES: hypothetical protein [Pseudomonas]<>phage protein [Pseudomonas sp. JY-Q]
Loki_gp14	31.96	97	53	2	29	123	26	111	3e-05	50.4	gi|490710978|ref|WP_004573862.1|;gi|480586845|gb|ENY79672.1|	hypothetical protein [Pseudomonas putida]<>hypothetical protein C206_00895 [Pseudomonas putida TRO1]
Loki_gp14	31.48	108	61	2	14	121	3	97	3e-05	50.1	gi|949670480|ref|WP_057050118.1|;gi|942728837|gb|KQD08276.1|;gi|943037308|gb|KQF85994.1|	hypothetical protein, partial [Acinetobacter baumannii]<>hypothetical protein APD04_15955, partial [Acinetobacter baumannii]<>hypothetical protein APC25_07930, partial [Acinetobacter baumannii]
Loki_gp14	27.87	122	78	3	5	126	1	112	4e-05	50.1	gi|985757705|ref|YP_009222831.1|;gi|846388394|dbj|BAR92399.1|	tail component [Pseudomonas phage PS-1]<>tail component [Pseudomonas phage PS-1]
Loki_gp14	32.43	111	58	3	14	124	20	113	4e-05	50.1	gi|939353550|ref|WP_054898878.1|	hypothetical protein [Pseudomonas sp. NBRC 111137]
Loki_gp14	28.42	95	59	1	29	123	26	111	5e-05	49.7	gi|983309223|ref|WP_060494908.1|	hypothetical protein [Pseudomonas sp. GTC 16482]
Loki_gp14	31.48	108	61	2	14	121	11	105	5e-05	49.7	gi|690990053|ref|WP_031960778.1|;gi|656766191|gb|KEF44824.1|;gi|656768954|gb|KEF47555.1|;gi|942901050|gb|KQE65820.1|;gi|942901421|gb|KQE66122.1|;gi|942945580|gb|KQF06703.1|;gi|943052453|gb|KQF99006.1|;gi|943054632|gb|KQG00832.1|;gi|1037643530|gb|OBC34195.1|;gi|1038626738|gb|OBL69278.1|	hypothetical protein [Acinetobacter baumannii]<>hypothetical protein FL75_11590 [Acinetobacter baumannii]<>hypothetical protein FL80_19070 [Acinetobacter baumannii]<>hypothetical protein APB88_09785 [Acinetobacter baumannii]<>hypothetical protein APB89_10010 [Acinetobacter baumannii]<>hypothetical protein APC02_12410 [Acinetobacter baumannii]<>hypothetical protein APC26_07105 [Acinetobacter bauma…
Loki_gp14	30.53	95	57	1	29	123	26	111	6e-05	49.7	gi|492094544|ref|WP_005746984.1|;gi|330989580|gb|EGH87683.1|;gi|821148169|gb|KKY52729.1|;gi|928335872|gb|KPB98127.1|;gi|928358990|gb|KPC20406.1|	hypothetical protein [Pseudomonas amygdali]<>hypothetical protein PLA107_31469 [Pseudomonas amygdali pv. lachrymans str. M301315]<>phage protein [Pseudomonas amygdali pv. lachrymans]<>Uncharacterized protein AC501_4534 [Pseudomonas amygdali pv. lachrymans]<>Uncharacterized protein AC499_2113 [Pseudomonas amygdali pv. lachrymans]
Loki_gp14	27.07	133	85	3	3	134	4	125	6e-05	49.7	gi|1039496158|ref|WP_064832576.1|;gi|1037361164|gb|ANL84674.1|;gi|1037367680|gb|ANL91181.1|	hypothetical protein [Rhizobium phaseoli]<>hypothetical protein AMC81_CH01893 [Rhizobium phaseoli]<>hypothetical protein AMC80_CH01893 [Rhizobium phaseoli]
Loki_gp14	28	125	81	2	5	129	1	116	8e-05	49.3	gi|566128358|ref|WP_024000883.1|;gi|524552630|dbj|GAD20958.1|	hypothetical protein [Acidovorax sp. MR-S7]<>hypothetical protein AVS7_00719 [Acidovorax sp. MR-S7]
Loki_gp14	30.68	88	50	2	41	127	37	114	9e-05	49.3	gi|1067241353|gb|OED34516.1|	hypothetical protein AB832_07405 [Flavobacteriaceae bacterium (ex Bugula neritina AB1)]
Loki_gp14	28.57	140	86	3	7	141	18	148	0.0001	49.7	gi|984662791|ref|WP_060766404.1|;gi|984320283|gb|KWV69676.1|	hypothetical protein [Pseudomonas fluorescens]<>hypothetical protein PFL603g_06381 [Pseudomonas fluorescens]
Loki_gp14	31.58	95	56	1	29	123	32	117	0.0001	48.9	gi|1001552842|ref|WP_061202700.1|;gi|984400031|gb|KWW18806.1|	hypothetical protein [Stenotrophomonas rhizophila]<>hypothetical protein AS889_04570 [Stenotrophomonas rhizophila]
Loki_gp14	26.61	124	78	2	5	127	1	112	0.0001	48.9	gi|771495240|ref|WP_045158750.1|	hypothetical protein [Pseudomonas stutzeri]
Loki_gp14	25.41	122	81	2	5	126	6	117	0.0001	48.9	gi|517040859|ref|WP_018229677.1|	hypothetical protein [Methyloversatilis universalis]
Loki_gp14	30.91	110	63	2	14	123	11	107	0.0001	48.5	gi|488083338|ref|WP_002154735.1|;gi|400382991|gb|EJP41669.1|;gi|588207553|gb|EXE80409.1|;gi|948343905|gb|KRI44263.1|;gi|1078625614|gb|OFD19502.1|;gi|1096358158|gb|OIC51509.1|;gi|1096518976|gb|OIE04106.1|;gi|1096821789|gb|OIG94583.1|	hypothetical protein [Acinetobacter baumannii]<>hypothetical protein ACIN5032_1129 [Acinetobacter baumannii OIFC032]<>hypothetical protein J583_1219 [Acinetobacter baumannii 83444]<>hypothetical protein APC31_03030 [Acinetobacter baumannii]<>hypothetical protein A1D04_05615 [Acinetobacter baumannii]<>hypothetical protein A7L06_10925 [Acinetobacter baumannii]<>hypothetical protein A7L78_17090 [Aci…
Loki_gp14	30.56	108	53	3	29	123	27	125	0.0001	48.9	gi|829063999|ref|WP_047297593.1|	phage protein [Pseudomonas fluorescens]
Loki_gp14	30.84	107	59	3	29	125	25	126	0.0001	49.3	gi|1134330139|ref|WP_076569925.1|	hypothetical protein [Janthinobacterium sp. TND4EL3]
Loki_gp14	30.84	107	59	3	29	125	28	129	0.0001	49.3	gi|1132051447|emb|SIR44147.1|	hypothetical protein SAMN05880566_112228 [Janthinobacterium sp. TND4EL3]
Loki_gp14	35.9	117	54	6	28	125	38	152	0.0002	49.3	gi|491170830|ref|WP_005029197.1|;gi|316921936|gb|EFV43206.1|	hypothetical protein [Bilophila wadsworthia]<>hypothetical protein HMPREF0179_02947 [Bilophila wadsworthia 3_1_6]
Loki_gp14	30.53	95	57	1	29	123	26	111	0.0002	48.5	gi|499416367|ref|WP_011103831.1|;gi|28869284|ref|NP_791903.1|;gi|28852525|gb|AAO55598.1|;gi|814994856|gb|KKI24522.1|;gi|814995920|gb|KKI25540.1|;gi|814996032|gb|KKI25648.1|	hypothetical protein [Pseudomonas syringae group genomosp. 3]<>hypothetical protein PSPTO_2080 [[Pseudomonas syringae] pv. tomato str. DC3000]<>conserved hypothetical protein, internal deletion [[Pseudomonas syringae] pv. tomato str. DC3000]<>phage protein [Pseudomonas syringae pv. persicae]<>phage protein [Pseudomonas syringae pv. persicae]<>phage protein [Pseudomonas syringae pv. persicae]
Loki_gp14	30.63	111	64	2	14	124	11	108	0.0002	48.1	gi|638928076|ref|WP_024438595.1|	hypothetical protein [Acinetobacter baumannii]
Loki_gp14	26.92	130	78	4	7	125	4	127	0.0002	48.5	gi|550936196|ref|WP_022684601.1|	hypothetical protein [Sphingobium sp. YL23]
Loki_gp15	100	1161	0	0	1	1161	1	1161	0	2316	gi|949419306|emb|CUS06476.1|	putative tail tapemeasure protein [unclassified Siphoviridae]
Loki_gp15	81.29	1160	214	2	1	1160	1	1157	0	1685	gi|589892167|ref|YP_009008532.1|;gi|583926721|gb|AHI60027.1|	putative tail tape measure protein [Acinetobacter phage IME_AB3]<>putative tail tape measure protein [Acinetobacter phage IME_AB3]
Loki_gp15	38.22	819	442	5	105	863	182	996	5e-145	479	gi|399528734|ref|YP_006560772.1|;gi|371767570|gb|AEX56104.1|	tail tape measure [Burkholderia phage KL1]<>tail tape measure [Burkholderia phage KL1]
Loki_gp15	32.69	1086	574	18	6	1082	2	939	6e-125	419	gi|971821772|ref|YP_009220354.1|;gi|827196352|gb|AKJ71378.1|	tail tape measure [Achromobacter phage phiAxp-1]<>tail tape measure [Achromobacter phage phiAxp-1]
Loki_gp15	34.39	887	486	17	1	823	1	855	9e-97	344	gi|823081432|gb|AKI28787.1|	tape measure protein [Stenotrophomonas phage vB_SmaS-DLP_1]
Loki_gp15	35.03	922	462	22	1	823	1	884	2e-95	341	gi|658311478|ref|YP_009044355.1|;gi|656178020|emb|CDN96781.1|	tape measure protein [Pseudomonas phage vB_PaeS_SCH_Ab26]<>tape measure protein [Pseudomonas phage vB_PaeS_SCH_Ab26]
Loki_gp15	34.71	922	465	22	1	823	1	884	2e-95	341	gi|388542680|ref|YP_006299885.1|;gi|378407748|gb|AFB83309.1|	tape measure protein [Pseudomonas phage vB_Pae-Kakheti25]<>tape measure protein [Pseudomonas phage vB_Pae-Kakheti25]
Loki_gp15	34.85	769	396	17	178	863	254	1000	2e-93	336	gi|971751683|ref|YP_009205616.1|;gi|936761521|gb|ALH23580.1|	tail tape measure protein [Pseudomonas phage PaMx42]<>tail tape measure protein [Pseudomonas phage PaMx42]
Loki_gp15	34.05	740	432	9	130	823	142	871	2e-89	323	gi|1015669863|gb|AMW36136.1|	tape measure protein [Xanthomonas phage XAJ2]
Loki_gp15	42.72	529	260	5	1	508	1	507	1e-87	319	gi|701904483|gb|AIW01684.1|	hypothetical protein vB_Pae_PS9N_00033 [Pseudomonas phage vB_Pae_PS9N]
Loki_gp15	42.53	529	261	5	1	508	1	507	1e-86	316	gi|148912848|ref|YP_001293427.1|	hypothetical protein ORF020 [Pseudomonas phage 73]
Loki_gp15	45.81	382	200	1	127	508	92	466	2e-79	295	gi|971766224|ref|YP_009219178.1|;gi|823081373|gb|AKI28729.1|	tape measure protein [Stenotrophomonas phage vB_SmaS-DLP_2]<>tape measure protein [Stenotrophomonas phage vB_SmaS-DLP_2]
Loki_gp15	38.27	473	243	7	1	440	1	457	1e-60	237	gi|985760165|ref|YP_009225686.1|;gi|910307322|gb|AKU43038.1|	tapemeasure [Rhodobacter phage RcTitan]<>tapemeasure [Rhodobacter phage RcTitan]
Loki_gp15	37.63	473	246	7	1	440	1	457	2e-58	230	gi|910307505|gb|AKU43204.1|	tapemeasure [Rhodobacter phage RcSpartan]
Loki_gp15	32.77	534	307	11	158	657	24	539	6e-52	209	gi|493295883|ref|WP_006253542.1|;gi|971760502|ref|YP_009213777.1|;gi|452087435|gb|EME03814.1|;gi|523433534|gb|AGQ40171.1|;gi|526274652|gb|AGR74852.1|;gi|528872774|gb|EPZ23888.1|;gi|528873507|gb|EPZ24596.1|;gi|528876293|gb|EPZ27330.1|;gi|738492663|gb|AJA73304.1|;gi|785796730|gb|AKA11107.1|;gi|785799878|gb|AKA13846.1|;gi|1009039966|gb|KYL06377.1|;gi|1009043898|gb|KYL10174.1|;gi|1009052837|gb|KYL187…	tape measure domain-containing protein [Mannheimia haemolytica]<>tail length tape measure protein [Mannheimia phage vB_MhS_1152AP2]<>hypothetical protein F388_05229 [Mannheimia haemolytica serotype 6 str. H23]<>hypothetical protein J451_00965 [Mannheimia haemolytica D174]<>hypothetical protein N220_05665 [Mannheimia haemolytica USMARC_2286]<>hypothetical protein L277_13500 [Mannheimia haemolytica…
Loki_gp15	32.77	534	307	11	158	657	24	539	8e-52	208	gi|1128877721|ref|WP_075272059.1|	hypothetical protein, partial [Mannheimia haemolytica]
Loki_gp15	32.77	534	307	11	158	657	24	539	1e-51	209	gi|544866951|ref|WP_021280660.1|;gi|528824536|gb|EPZ01362.1|	tape measure domain-containing protein, partial [Mannheimia haemolytica]<>hypothetical protein L279_12605, partial [Mannheimia haemolytica D38]
Loki_gp15	32.77	534	307	11	158	657	24	539	1e-51	208	gi|1128874148|ref|WP_075270778.1|	hypothetical protein, partial [Mannheimia haemolytica]
Loki_gp15	32.77	534	307	11	158	657	24	539	1e-51	208	gi|1096222577|ref|WP_071169649.1|;gi|1093632285|gb|OHY15613.1|	hypothetical protein, partial [Mannheimia haemolytica]<>hypothetical protein BKP53_05660, partial [Mannheimia haemolytica]
Loki_gp15	27.34	673	424	12	184	818	52	697	8e-51	205	gi|1041900488|ref|WP_065235103.1|	phage tail tape measure protein [Gallibacterium genomosp. 3]
Loki_gp15	36.14	83	44	2	1021	1094	786	868	4	43.1	gi|1041900488|ref|WP_065235103.1|	phage tail tape measure protein [Gallibacterium genomosp. 3]
Loki_gp15	30.46	499	291	10	196	659	61	538	4e-50	204	gi|491992167|ref|WP_005709706.1|;gi|385693511|gb|EIG24155.1|	phage tail tape measure protein [Haemophilus paraphrohaemolyticus]<>putative phage tail tape measure protein, lambda family [Haemophilus paraphrohaemolyticus HK411]
Loki_gp15	23.58	742	494	9	162	880	20	711	4e-50	203	gi|399529031|ref|YP_006561076.1|;gi|394778557|gb|AFN39640.1|	tail length tape measure protein [Pseudomonas phage MP1412]<>tail length tape measure protein [Pseudomonas phage MP1412]
Loki_gp15	23.48	741	495	9	162	880	20	710	1e-49	202	gi|162135151|ref|YP_001595892.1|;gi|161513998|emb|CAO77824.1|	structural phage protein [Pseudomonas phage YuA]<>structural phage protein [Pseudomonas phage YuA]
Loki_gp15	23.45	742	495	9	162	880	20	711	1e-48	199	gi|471216577|gb|AGI11317.1|	minor tail protein [Pseudomonas phage LKO4]
Loki_gp15	30.1	608	363	21	179	752	44	623	1e-47	195	gi|512755303|gb|EPE68169.1|	hypothetical protein I141_06798, partial [Pasteurella multocida P1933]
Loki_gp15	32.91	468	266	11	147	592	66	507	2e-47	196	gi|1053829800|ref|WP_066075720.1|	phage tail protein [Bergeriella denitrificans]
Loki_gp15	30.1	608	363	21	179	752	44	623	2e-47	195	gi|514429798|ref|WP_016570179.1|;gi|557248906|gb|ESQ71002.1|	tape measure domain-containing protein [Pasteurella multocida]<>hypothetical protein P1062_0212210 [Pasteurella multocida subsp. multocida P1062]
Loki_gp15	29.75	605	369	18	179	752	44	623	5e-47	193	gi|1039733142|ref|WP_064965045.1|;gi|1039057881|gb|OBP35924.1|	hypothetical protein [Pasteurella multocida]<>hypothetical protein A0R74_02635 [Pasteurella multocida subsp. multocida]
Loki_gp15	23.72	742	493	9	162	880	20	711	1e-46	192	gi|149408260|ref|YP_001294539.1|	hypothetical protein ORF031 [Pseudomonas phage M6]
Loki_gp15	30.79	604	364	19	179	752	44	623	2e-46	191	gi|1039394276|ref|WP_064775656.1|;gi|1036429262|gb|ANJ90593.1|;gi|1062768302|gb|AON59273.1|	hypothetical protein [Pasteurella multocida]<>putative tail length tape measure protein [Pasteurella multocida subsp. multocida HB01]<>hypothetical protein AZI96_11270 [Pasteurella multocida]
Loki_gp15	29.47	526	329	11	164	658	26	540	4e-46	188	gi|401687568|gb|EJS83313.1|	putative tail length tape measure protein, putative phage associated protein, partial [Pasteurella multocida subsp. multocida str. P52VAC]
Loki_gp15	29.7	623	379	19	164	752	26	623	5e-46	190	gi|1063921540|gb|ODS43210.1|	hypothetical protein BGK37_12250 [Pasteurella multocida]
Loki_gp15	29.47	526	329	11	164	658	26	540	7e-46	190	gi|514187939|ref|WP_016534136.1|;gi|512763050|gb|EPE75385.1|;gi|544579248|gb|ERL40732.1|;gi|662151248|gb|KEP93832.1|;gi|666548439|gb|KEZ08565.1|;gi|666548547|gb|KEZ08671.1|;gi|836554024|gb|KLV11932.1|;gi|1061868730|gb|ODN40080.1|;gi|1101472409|gb|APB78810.1|	tape measure domain-containing protein [Pasteurella multocida]<>hypothetical protein I010_06559 [Pasteurella multocida 1500C]<>hypothetical protein B654_09071 [Pasteurella multocida subsp. multocida str. PMTB]<>hypothetical protein UQU_0204575 [Pasteurella multocida subsp. multocida VTCCBAA264]<>hypothetical protein GJ37_07575 [Pasteurella multocida]<>hypothetical protein GJ36_00425 [Pasteurella …
Loki_gp15	28.94	508	322	10	179	658	44	540	1e-45	189	gi|1128875378|ref|WP_075271387.1|	hypothetical protein [Pasteurella multocida]
Loki_gp15	30.98	439	272	8	159	587	21	438	2e-45	188	gi|590121800|dbj|BAO53121.1|	virion protein, putative tape measure protein [Pseudomonas phage KPP23]
Loki_gp15	23.85	742	492	9	162	880	20	711	8e-45	187	gi|971762591|ref|YP_009215714.1|;gi|930349077|gb|ALF51523.1|	putative tape measure protein [Pseudomonas phage PAE1]<>putative tape measure protein [Pseudomonas phage PAE1]
Loki_gp15	30.35	537	316	12	176	704	90	576	2e-43	182	gi|844839007|ref|WP_047950232.1|;gi|830055240|gb|KLR84110.1|	tail protein, partial [Neisseria gonorrhoeae]<>tail protein, partial [Neisseria gonorrhoeae SK15454]
Loki_gp15	30.35	537	316	12	176	704	90	576	3e-43	181	gi|844733451|ref|WP_047926687.1|;gi|830123565|gb|KLS31979.1|	tail protein, partial [Neisseria gonorrhoeae]<>tail protein, partial [Neisseria gonorrhoeae ALB_2011_03_03]
Loki_gp15	29.73	565	346	12	176	726	93	620	4e-43	182	gi|1006075261|ref|WP_061725841.1|;gi|990546196|emb|CWP55885.1|;gi|990667869|emb|CWT22732.1|	phage tail protein [Neisseria meningitidis]<>Minor tail protein Gp26 [Neisseria meningitidis]<>Minor tail protein Gp26 [Neisseria meningitidis]
Loki_gp15	30.17	537	317	12	176	704	90	576	4e-43	181	gi|844879612|ref|WP_047953049.1|;gi|830055413|gb|KLR84205.1|	tail protein, partial [Neisseria gonorrhoeae]<>tail protein, partial [Neisseria gonorrhoeae SK1902]
Loki_gp15	30.17	537	317	12	176	704	90	576	5e-43	178	gi|830228055|gb|KLT08133.1|	tail protein, partial [Neisseria gonorrhoeae MU_NG20]
Loki_gp15	30.35	537	316	12	176	704	90	576	5e-43	180	gi|844728236|ref|WP_047925542.1|;gi|830205782|gb|KLS92061.1|	tail protein, partial [Neisseria gonorrhoeae]<>tail protein, partial [Neisseria gonorrhoeae MU_NG14]
Loki_gp15	30.35	537	316	12	176	704	90	576	5e-43	182	gi|844702791|ref|WP_047921878.1|;gi|830090832|gb|KLS08361.1|;gi|1035876520|gb|ANJ51875.1|	tail protein [Neisseria gonorrhoeae]<>tail protein [Neisseria gonorrhoeae ATL_2011_01_08]<>phage tail protein [Neisseria gonorrhoeae]
Loki_gp15	30.35	537	316	12	176	704	90	576	5e-43	181	gi|912496677|ref|WP_050171567.1|;gi|891769892|emb|CNU01644.1|	phage tail protein [Neisseria gonorrhoeae]<>tail length tape measure protein%2C phage associated protein [Neisseria gonorrhoeae]
Loki_gp15	23.02	682	488	7	164	823	110	776	6e-43	182	gi|1129592411|ref|WP_075539111.1|;gi|1045609873|gb|OCG31611.1|	hypothetical protein [Gilliamella apicola]<>hypothetical protein A9G29_06195 [Gilliamella apicola]
Loki_gp15	51.43	35	17	0	1037	1071	974	1008	0.3	47	gi|1129592411|ref|WP_075539111.1|;gi|1045609873|gb|OCG31611.1|	hypothetical protein [Gilliamella apicola]<>hypothetical protein A9G29_06195 [Gilliamella apicola]
Loki_gp15	31.09	476	287	7	131	586	10	464	7e-43	181	gi|1044872521|ref|WP_065424133.1|	phage tail protein [Neisseria meningitidis]
Loki_gp15	30.17	537	317	12	176	704	90	576	7e-43	177	gi|830158635|gb|KLS57426.1|	tail protein, partial [Neisseria gonorrhoeae NYC_2011_05_13]
Loki_gp15	30.17	537	317	12	176	704	90	576	1e-42	178	gi|1098497316|ref|WP_071224863.1|;gi|1095677129|gb|OHZ64710.1|	phage tail protein, partial [Neisseria gonorrhoeae]<>phage tail protein, partial [Neisseria gonorrhoeae]
Loki_gp15	30.35	537	316	12	176	704	90	576	1e-42	180	gi|912491672|ref|WP_050169696.1|;gi|891781139|emb|CNS03337.1|	phage tail protein [Neisseria gonorrhoeae]<>tail length tape measure protein%2C phage associated protein [Neisseria gonorrhoeae]
Loki_gp15	30.17	537	317	12	176	704	90	576	1e-42	180	gi|912497865|ref|WP_050171919.1|;gi|891953017|emb|CNT08796.1|;gi|891970539|emb|CNS02452.1|;gi|891994593|emb|CNQ31330.1|	phage tail protein [Neisseria gonorrhoeae]<>tail length tape measure protein%2C phage associated protein [Neisseria gonorrhoeae]<>tail length tape measure protein%2C phage associated protein [Neisseria gonorrhoeae]<>tail length tape measure protein%2C phage associated protein [Neisseria gonorrhoeae]
Loki_gp15	30.35	537	316	12	176	704	90	576	1e-42	180	gi|844710562|ref|WP_047922708.1|;gi|802445180|emb|CFR64551.1|;gi|810138474|emb|CNQ61612.1|;gi|830130550|gb|KLS37270.1|;gi|891681427|emb|CNQ81912.1|;gi|891766017|emb|CNT86497.1|;gi|891772530|emb|CNT44669.1|;gi|891857209|emb|CNR18459.1|;gi|891862044|emb|CNQ40861.1|;gi|892018638|emb|CNS16774.1|	tail protein [Neisseria gonorrhoeae]<>tail length tape measure protein%2C phage associated protein [Neisseria gonorrhoeae]<>tail length tape measure protein%2C phage associated protein [Neisseria gonorrhoeae]<>tail protein [Neisseria gonorrhoeae ATL_2011_01_05]<>tail length tape measure protein%2C phage associated protein [Neisseria gonorrhoeae]<>tail length tape measure protein%2C phage associat…
Loki_gp15	30.17	537	317	12	176	704	90	576	2e-42	179	gi|844865330|ref|WP_047952094.1|;gi|830137499|gb|KLS41643.1|	tail protein, partial [Neisseria gonorrhoeae]<>tail protein, partial [Neisseria gonorrhoeae SK23020]
Loki_gp15	30.17	537	317	12	176	704	90	576	2e-42	180	gi|844693877|ref|WP_047920012.1|;gi|830223793|gb|KLT04986.1|;gi|1133377667|gb|APW53496.1|	tail protein [Neisseria gonorrhoeae]<>tail protein [Neisseria gonorrhoeae MU_NG25]<>tail protein [Neisseria gonorrhoeae NG-k51.05]
Loki_gp15	30.17	537	317	12	176	704	90	576	2e-42	179	gi|830074251|gb|KLR97041.1|	tail protein, partial [Neisseria gonorrhoeae SK708]
Loki_gp15	30.17	537	317	12	176	704	90	576	2e-42	180	gi|912271108|ref|WP_050161617.1|;gi|891974929|emb|CNQ01477.1|	phage tail protein [Neisseria gonorrhoeae]<>tail length tape measure protein%2C phage associated protein [Neisseria gonorrhoeae]
Loki_gp15	30.17	537	317	12	176	704	90	576	2e-42	179	gi|912490960|ref|WP_050169467.1|;gi|891761236|emb|CNQ93850.1|	phage tail protein [Neisseria gonorrhoeae]<>tail length tape measure protein%2C phage associated protein [Neisseria gonorrhoeae]
Loki_gp15	30.17	537	317	12	176	704	90	576	2e-42	179	gi|844704242|ref|WP_047922080.1|;gi|830117638|gb|KLS27588.1|	tail protein [Neisseria gonorrhoeae]<>tail protein [Neisseria gonorrhoeae MIA_2011_05-10]
Loki_gp15	30.17	537	317	12	176	704	90	576	2e-42	179	gi|912488569|ref|WP_050168598.1|;gi|891707189|emb|CNP79396.1|	phage tail protein [Neisseria gonorrhoeae]<>tail length tape measure protein%2C phage associated protein [Neisseria gonorrhoeae]
Loki_gp15	30.17	537	317	12	176	704	90	576	2e-42	179	gi|1098708875|ref|WP_071288325.1|;gi|1095684545|gb|OHZ71448.1|	phage tail protein, partial [Neisseria gonorrhoeae]<>phage tail protein, partial [Neisseria gonorrhoeae]
Loki_gp15	30.17	537	317	12	176	704	90	576	3e-42	179	gi|911523085|ref|WP_050154656.1|;gi|891438677|emb|CNS11589.1|;gi|891457635|emb|CNS19110.1|;gi|891477067|emb|CNS99418.1|;gi|891489534|emb|CNR18218.1|;gi|891565966|emb|CNQ91150.1|;gi|891576518|emb|CNT10531.1|;gi|891589715|emb|CNQ93251.1|;gi|891735149|emb|CNT02929.1|;gi|1095690620|gb|OHZ76955.1|;gi|1095709127|gb|OHZ93677.1|;gi|1095758239|gb|OIA38268.1|;gi|1095759040|gb|OIA38997.1|;gi|1095768752|gb|O…	phage tail protein [Neisseria gonorrhoeae]<>tail length tape measure protein%2C phage associated protein [Neisseria gonorrhoeae]<>tail length tape measure protein%2C phage associated protein [Neisseria gonorrhoeae]<>tail length tape measure protein%2C phage associated protein [Neisseria gonorrhoeae]<>tail length tape measure protein%2C phage associated protein [Neisseria gonorrhoeae]<>tail length…
Loki_gp15	30.17	537	317	12	176	704	90	576	3e-42	179	gi|942702321|ref|WP_055405954.1|;gi|810262552|emb|CNT73674.1|	phage tail protein [Neisseria gonorrhoeae]<>tail length tape measure protein%2C phage associated protein [Neisseria gonorrhoeae]
Loki_gp15	30.17	537	317	12	176	704	90	576	3e-42	179	gi|911741527|ref|WP_050156300.1|;gi|802418403|emb|CFR41922.1|;gi|810084206|emb|CNO66259.1|;gi|891713498|emb|CNS13755.1|;gi|891726537|emb|CNT99233.1|;gi|891789543|emb|CNT02670.1|;gi|891827483|emb|CNO71238.1|;gi|891957404|emb|CNS37680.1|;gi|891992363|emb|CNT49593.1|;gi|1035874618|gb|ANJ50265.1|	phage tail protein [Neisseria gonorrhoeae]<>tail length tape measure protein%2C phage associated protein [Neisseria gonorrhoeae]<>tail length tape measure protein%2C phage associated protein [Neisseria gonorrhoeae]<>tail length tape measure protein%2C phage associated protein [Neisseria gonorrhoeae]<>tail length tape measure protein%2C phage associated protein [Neisseria gonorrhoeae]<>tail length…
Loki_gp15	30.17	537	317	12	176	704	90	576	3e-42	179	gi|1096984136|ref|WP_071197859.1|;gi|1095792949|gb|OIA68834.1|	phage tail protein [Neisseria gonorrhoeae]<>phage tail protein [Neisseria gonorrhoeae]
Loki_gp15	30.17	537	317	12	176	704	90	576	3e-42	179	gi|912462425|ref|WP_050165029.1|;gi|891822199|emb|CNT23321.1|	phage tail protein [Neisseria gonorrhoeae]<>tail length tape measure protein%2C phage associated protein [Neisseria gonorrhoeae]
Loki_gp15	30.17	537	317	12	176	704	90	576	3e-42	179	gi|1096992038|ref|WP_071201020.1|;gi|1095802602|gb|OIA77363.1|	phage tail protein [Neisseria gonorrhoeae]<>phage tail protein [Neisseria gonorrhoeae]
Loki_gp15	30.17	537	317	12	176	704	90	576	3e-42	179	gi|1066411320|emb|SBO52839.1|;gi|1067587057|emb|SBN17684.1|	tail length tape measure protein [Neisseria gonorrhoeae]<>tail length tape measure protein, phage associated protein [Neisseria gonorrhoeae]
Loki_gp15	30.17	537	317	12	176	704	90	576	3e-42	179	gi|844693562|ref|WP_047919947.1|;gi|830095388|gb|KLS11460.1|	tail protein [Neisseria gonorrhoeae]<>tail protein [Neisseria gonorrhoeae ATL_2011_01_17]
Loki_gp15	30.17	537	317	12	176	704	90	576	3e-42	179	gi|912883604|ref|WP_050304505.1|;gi|891687897|emb|CNR50836.1|	phage tail protein [Neisseria gonorrhoeae]<>tail length tape measure protein%2C phage associated protein [Neisseria gonorrhoeae]
Loki_gp15	30.17	537	317	12	176	704	90	576	4e-42	179	gi|1066420362|emb|SBO70826.1|;gi|1067593241|emb|SBM86742.1|	tail length tape measure protein [Neisseria gonorrhoeae]<>tail length tape measure protein, phage associated protein [Neisseria gonorrhoeae]
Loki_gp15	30.17	537	317	12	176	704	90	576	4e-42	178	gi|844847173|ref|WP_047950666.1|;gi|830109909|gb|KLS21617.1|	tail protein, partial [Neisseria gonorrhoeae]<>tail protein, partial [Neisseria gonorrhoeae SK36809]
Loki_gp15	30.17	537	317	12	176	704	90	576	4e-42	179	gi|950290512|ref|WP_057321762.1|;gi|800199758|emb|CFB81986.1|	phage tail protein [Neisseria gonorrhoeae]<>tail length tape measure protein%2C phage associated protein [Neisseria gonorrhoeae]
Loki_gp15	30.17	537	317	12	176	704	90	576	4e-42	179	gi|912023596|ref|WP_050159377.1|;gi|891461782|emb|CNS12764.1|;gi|891796109|emb|CNR25954.1|	phage tail protein [Neisseria gonorrhoeae]<>tail length tape measure protein%2C phage associated protein [Neisseria gonorrhoeae]<>tail length tape measure protein%2C phage associated protein [Neisseria gonorrhoeae]
Loki_gp15	30.17	537	317	12	176	704	90	576	4e-42	179	gi|844685024|ref|WP_047917382.1|;gi|830111823|gb|KLS23018.1|;gi|830179815|gb|KLS72923.1|	tail protein [Neisseria gonorrhoeae]<>tail protein [Neisseria gonorrhoeae ATL_2011_01-25]<>tail protein [Neisseria gonorrhoeae MU_NG15]
Loki_gp15	30.17	537	317	12	176	704	90	576	4e-42	179	gi|874356719|ref|WP_048653198.1|;gi|830150024|gb|KLS50957.1|;gi|1066413035|emb|SBO49019.1|;gi|1066424831|emb|SBO70435.1|;gi|1067565132|emb|SBN22125.1|;gi|1067569362|emb|SBN22654.1|	tail protein [Neisseria gonorrhoeae]<>tail protein [Neisseria gonorrhoeae MU_NG3]<>tail length tape measure protein [Neisseria gonorrhoeae]<>tail length tape measure protein [Neisseria gonorrhoeae]<>tail length tape measure protein, phage associated protein [Neisseria gonorrhoeae]<>tail length tape measure protein, phage associated protein [Neisseria gonorrhoeae]
Loki_gp15	30.17	537	317	12	176	704	90	576	5e-42	178	gi|911618369|ref|WP_050155384.1|;gi|800102735|emb|CFA00004.1|;gi|810071801|emb|CNS91958.1|;gi|810086859|emb|CNR90629.1|;gi|810099879|emb|CNT08292.1|;gi|810114994|emb|CNS69818.1|;gi|810120942|emb|CNQ86632.1|;gi|891650223|emb|CNQ03712.1|;gi|891670550|emb|CNR19235.1|;gi|891674912|emb|CNR19076.1|;gi|891694374|emb|CNQ84527.1|;gi|891740121|emb|CNT06388.1|;gi|891752880|emb|CNP59212.1|;gi|891791737|emb|C…	phage tail protein [Neisseria gonorrhoeae]<>tail length tape measure protein%2C phage associated protein [Neisseria gonorrhoeae]<>tail length tape measure protein%2C phage associated protein [Neisseria gonorrhoeae]<>tail length tape measure protein%2C phage associated protein [Neisseria gonorrhoeae]<>tail length tape measure protein%2C phage associated protein [Neisseria gonorrhoeae]<>tail length…
Loki_gp15	30.17	537	317	12	176	704	90	576	5e-42	178	gi|844702051|ref|WP_047921785.1|;gi|830172840|gb|KLS67809.1|;gi|891935631|emb|CNS35728.1|	tail protein [Neisseria gonorrhoeae]<>tail protein [Neisseria gonorrhoeae MU_NG12]<>tail length tape measure protein%2C phage associated protein [Neisseria gonorrhoeae]
Loki_gp15	29.98	537	318	12	176	704	90	576	5e-42	178	gi|1066422620|emb|SBO68134.1|;gi|1067564598|emb|SBM94266.1|	tail length tape measure protein [Neisseria gonorrhoeae]<>tail length tape measure protein, phage associated protein [Neisseria gonorrhoeae]
Loki_gp15	30.17	537	317	12	176	704	90	576	5e-42	178	gi|489787510|ref|WP_003691401.1|;gi|268548458|gb|EEZ43876.1|;gi|870665900|gb|AKP14267.1|	tail protein [Neisseria gonorrhoeae]<>conserved hypothetical protein [Neisseria gonorrhoeae 35/02]<>hypothetical protein WX61_00178 [Neisseria gonorrhoeae]
Loki_gp15	29.98	537	318	12	176	704	90	576	5e-42	178	gi|1096985430|ref|WP_071198110.1|;gi|1095761946|gb|OIA41685.1|;gi|1095808369|gb|OIA82586.1|;gi|1095821416|gb|OIA94475.1|;gi|1095823569|gb|OIA96445.1|	phage tail protein [Neisseria gonorrhoeae]<>phage tail protein [Neisseria gonorrhoeae]<>phage tail protein [Neisseria gonorrhoeae]<>phage tail protein [Neisseria gonorrhoeae]<>phage tail protein [Neisseria gonorrhoeae]
Loki_gp15	30.17	537	317	12	176	704	90	576	6e-42	178	gi|1096988611|ref|WP_071200284.1|;gi|1095773094|gb|OIA51810.1|	phage tail protein [Neisseria gonorrhoeae]<>phage tail protein [Neisseria gonorrhoeae]
Loki_gp15	30.17	537	317	12	176	704	90	576	6e-42	178	gi|844885922|ref|WP_047953556.1|;gi|800238297|emb|CFC46747.1|;gi|800240550|emb|CFC48645.1|;gi|800242673|emb|CFC50768.1|;gi|800351231|emb|CFE30427.1|;gi|810050244|emb|CNT77858.1|;gi|810080435|emb|CNS56755.1|;gi|810090685|emb|CNP38790.1|;gi|810118849|emb|CNS65391.1|;gi|810155369|emb|CNS20123.1|;gi|810157930|emb|CNQ32970.1|;gi|810209406|emb|CNQ83452.1|;gi|810242149|emb|CNR70851.1|;gi|830121088|gb|KL…	tail protein [Neisseria gonorrhoeae]<>tail length tape measure protein%2C phage associated protein [Neisseria gonorrhoeae]<>tail length tape measure protein%2C phage associated protein [Neisseria gonorrhoeae]<>tail length tape measure protein%2C phage associated protein [Neisseria gonorrhoeae]<>tail length tape measure protein%2C phage associated protein [Neisseria gonorrhoeae]<>tail length tape …
Loki_gp15	30.17	537	317	12	176	704	90	576	6e-42	178	gi|912208585|ref|WP_050161161.1|;gi|891479153|emb|CNT38511.1|;gi|891750400|emb|CNT38541.1|	phage tail protein [Neisseria gonorrhoeae]<>tail length tape measure protein%2C phage associated protein [Neisseria gonorrhoeae]<>tail length tape measure protein%2C phage associated protein [Neisseria gonorrhoeae]
Loki_gp15	30.17	537	317	12	176	704	90	576	6e-42	178	gi|856831875|ref|WP_048339616.1|;gi|850060686|gb|KMM29153.1|	tail protein [Neisseria gonorrhoeae]<>tail protein [Neisseria gonorrhoeae]
Loki_gp15	29.56	565	347	12	176	726	93	620	6e-42	178	gi|488160503|ref|WP_002231711.1|;gi|402319322|gb|EJU54832.1|	tail protein [Neisseria meningitidis]<>minor tail protein Gp26 [Neisseria meningitidis 93003]
Loki_gp15	29.98	537	318	12	176	704	90	576	6e-42	178	gi|912868540|ref|WP_050301755.1|;gi|891500151|emb|CNP86780.1|	phage tail protein [Neisseria gonorrhoeae]<>tail length tape measure protein%2C phage associated protein [Neisseria gonorrhoeae]
Loki_gp15	29.98	537	318	12	176	704	90	576	6e-42	178	gi|844686754|ref|WP_047917998.1|;gi|800585550|emb|CFH37920.1|;gi|810255201|emb|CNR92413.1|;gi|830145147|gb|KLS47266.1|;gi|830158631|gb|KLS57423.1|;gi|830166079|gb|KLS63001.1|;gi|891759067|emb|CNS85244.1|;gi|891830799|emb|CNS21464.1|;gi|891868158|emb|CNU12543.1|;gi|891894212|emb|CNT53196.1|;gi|891907266|emb|CNS22960.1|;gi|891950864|emb|CNR02591.1|;gi|892001102|emb|CNR11570.1|;gi|892033996|emb|CNP7…	tail protein [Neisseria gonorrhoeae]<>tail length tape measure protein%2C phage associated protein [Neisseria gonorrhoeae]<>tail length tape measure protein%2C phage associated protein [Neisseria gonorrhoeae]<>tail protein [Neisseria gonorrhoeae ALB_2011_01-02]<>tail protein [Neisseria gonorrhoeae NYC_2011_05_07]<>tail protein [Neisseria gonorrhoeae MIA_2011_05-15]<>tail length tape measure prote…
Loki_gp15	30.17	537	317	12	176	704	90	576	6e-42	178	gi|912507874|ref|WP_050173476.1|;gi|891961785|emb|CNT29772.1|	phage tail protein [Neisseria gonorrhoeae]<>tail length tape measure protein%2C phage associated protein [Neisseria gonorrhoeae]
Loki_gp15	30.17	537	317	12	176	704	90	576	6e-42	178	gi|913373793|ref|WP_050388721.1|;gi|810207191|emb|CNR25925.1|;gi|891722234|emb|CNP49149.1|;gi|891903372|emb|CNR11316.1|;gi|891983723|emb|CNS51340.1|	phage tail protein [Neisseria gonorrhoeae]<>tail length tape measure protein%2C phage associated protein [Neisseria gonorrhoeae]<>tail length tape measure protein%2C phage associated protein [Neisseria gonorrhoeae]<>tail length tape measure protein%2C phage associated protein [Neisseria gonorrhoeae]<>tail length tape measure protein%2C phage associated protein [Neisseria gonorrhoeae]
Loki_gp15	29.98	537	318	12	176	704	90	576	7e-42	178	gi|912491817|ref|WP_050169774.1|;gi|891973153|emb|CNR26837.1|	phage tail protein [Neisseria gonorrhoeae]<>tail length tape measure protein%2C phage associated protein [Neisseria gonorrhoeae]
Loki_gp15	29.98	537	318	12	176	704	90	576	7e-42	178	gi|912452123|ref|WP_050163154.1|;gi|892042739|emb|CNP86834.1|	phage tail protein [Neisseria gonorrhoeae]<>tail length tape measure protein%2C phage associated protein [Neisseria gonorrhoeae]
Loki_gp15	30.17	537	317	12	176	704	90	576	7e-42	178	gi|912457858|ref|WP_050164458.1|;gi|891689737|emb|CNQ98057.1|	phage tail protein [Neisseria gonorrhoeae]<>tail length tape measure protein%2C phage associated protein [Neisseria gonorrhoeae]
Loki_gp15	30.17	537	317	12	176	704	90	576	7e-42	178	gi|844700918|ref|WP_047921608.1|;gi|830156900|gb|KLS56066.1|;gi|1035872030|gb|ANJ47991.1|;gi|1095730240|gb|OIA12804.1|	tail protein [Neisseria gonorrhoeae]<>tail protein [Neisseria gonorrhoeae MIA_2011_02_02]<>phage tail protein [Neisseria gonorrhoeae]<>phage tail protein [Neisseria gonorrhoeae]
Loki_gp15	30.17	537	317	12	176	704	90	576	7e-42	178	gi|844727516|ref|WP_047925366.1|;gi|831430426|gb|KLU13338.1|	tail protein [Neisseria gonorrhoeae]<>tail protein [Neisseria gonorrhoeae]
Loki_gp15	30.17	537	317	12	176	704	90	576	8e-42	178	gi|912492268|ref|WP_050169991.1|;gi|891785531|emb|CNQ13719.1|;gi|891787352|emb|CNQ99642.1|;gi|891898561|emb|CNT60309.1|	phage tail protein [Neisseria gonorrhoeae]<>tail length tape measure protein%2C phage associated protein [Neisseria gonorrhoeae]<>tail length tape measure protein%2C phage associated protein [Neisseria gonorrhoeae]<>tail length tape measure protein%2C phage associated protein [Neisseria gonorrhoeae]
Loki_gp15	30.17	537	317	12	176	704	90	576	9e-42	177	gi|844699521|ref|WP_047921519.1|;gi|830196671|gb|KLS85412.1|	tail protein [Neisseria gonorrhoeae]<>tail protein [Neisseria gonorrhoeae MU_NG5]
Loki_gp15	29.8	537	319	12	176	704	90	576	9e-42	177	gi|844833603|ref|WP_047949623.1|;gi|830083997|gb|KLS03488.1|	tail protein, partial [Neisseria gonorrhoeae]<>tail protein, partial [Neisseria gonorrhoeae SK22871]
Loki_gp15	30.17	537	317	12	176	704	90	576	9e-42	177	gi|913372302|ref|WP_050388233.1|;gi|891534064|emb|CNT63796.1|	phage tail protein [Neisseria gonorrhoeae]<>tail length tape measure protein%2C phage associated protein [Neisseria gonorrhoeae]
Loki_gp15	29.98	537	318	12	176	704	90	576	1e-41	176	gi|844690561|ref|WP_047919230.1|;gi|830069427|gb|KLR93825.1|	tail protein, partial [Neisseria gonorrhoeae]<>tail protein, partial [Neisseria gonorrhoeae SK7461]
Loki_gp15	29.98	537	318	12	176	704	90	576	1e-41	177	gi|911725652|ref|WP_050156065.1|;gi|891824327|emb|CNO69360.1|;gi|891913753|emb|CNP05334.1|	phage tail protein [Neisseria gonorrhoeae]<>tail length tape measure protein%2C phage associated protein [Neisseria gonorrhoeae]<>tail length tape measure protein%2C phage associated protein [Neisseria gonorrhoeae]
Loki_gp15	30.17	537	317	12	176	704	90	576	1e-41	177	gi|912068490|ref|WP_050159905.1|;gi|891447191|emb|CNS31390.1|;gi|891504412|emb|CNQ82718.1|;gi|892036863|emb|CNS11093.1|;gi|1095671264|gb|OHZ59397.1|;gi|1095674930|gb|OHZ62716.1|	phage tail protein [Neisseria gonorrhoeae]<>tail length tape measure protein%2C phage associated protein [Neisseria gonorrhoeae]<>tail length tape measure protein%2C phage associated protein [Neisseria gonorrhoeae]<>tail length tape measure protein%2C phage associated protein [Neisseria gonorrhoeae]<>phage tail protein [Neisseria gonorrhoeae]<>phage tail protein [Neisseria gonorrhoeae]
Loki_gp16	100	205	0	0	1	205	1	205	8e-148	417	gi|949419307|emb|CUS06477.1|	putative distal tail protein [unclassified Siphoviridae]
Loki_gp16	83.9	205	33	0	1	205	1	205	7e-127	364	gi|589892166|ref|YP_009008531.1|;gi|583926720|gb|AHI60026.1|	hypothetical protein IME_AB3_27 [Acinetobacter phage IME_AB3]<>hypothetical protein IME_AB3_27 [Acinetobacter phage IME_AB3]
Loki_gp16	31.47	197	125	3	9	202	9	198	1e-20	94.7	gi|828164631|ref|WP_047255631.1|;gi|827594390|gb|KLN97344.1|	hypothetical protein [Moellerella wisconsensis]<>phage protein [Moellerella wisconsensis]
Loki_gp16	30.96	197	124	4	10	202	10	198	1e-19	92	gi|504469377|ref|WP_014656479.1|;gi|384478981|gb|AFH92776.1|	hypothetical protein [Providencia stuartii]<>phage protein [Providencia stuartii MRSN 2154]
Loki_gp16	34.88	172	105	3	1	172	1	165	3e-19	90.9	gi|640885138|ref|YP_009032388.1|;gi|601131750|gb|AHN84581.1|	hypothetical protein 9g_00065 [Enterobacteria phage 9g]<>hypothetical protein 9g_00065 [Enterobacteria phage 9g]
Loki_gp16	34.3	172	106	3	1	172	1	165	1e-18	89	gi|971766390|ref|YP_009219297.1|;gi|797192625|gb|AKA61057.1|	hypothetical protein [Enterobacteria phage JenK1]<>hypothetical protein [Enterobacteria phage JenK1]
Loki_gp16	29.59	196	128	3	10	202	10	198	5e-18	87.4	gi|921164655|ref|WP_053110558.1|;gi|914270770|gb|KNZ84841.1|	hypothetical protein [Providencia stuartii]<>phage protein [Providencia stuartii]
Loki_gp16	31.67	180	116	3	1	180	1	173	2e-17	85.9	gi|971763985|ref|YP_009216955.1|;gi|797192526|gb|AKA60970.1|	hypothetical protein [Enterobacteria phage JenP2]<>hypothetical protein [Enterobacteria phage JenP2]
Loki_gp16	32.72	162	108	1	7	168	11	171	2e-17	85.9	gi|494679274|ref|WP_007436609.1|;gi|363717799|gb|EHM01161.1|	hypothetical protein [Acetobacteraceae bacterium AT-5844]<>hypothetical protein HMPREF9946_02236 [Acetobacteraceae bacterium AT-5844]
Loki_gp16	31.67	180	116	3	1	180	1	173	2e-17	85.9	gi|971767084|ref|YP_009219987.1|;gi|797192427|gb|AKA60883.1|	hypothetical protein [Enterobacteria phage JenP1]<>hypothetical protein [Enterobacteria phage JenP1]
Loki_gp16	32.47	194	121	4	12	202	9	195	4e-17	85.1	gi|284007838|emb|CBA73727.1|	conserved hypothetical phage protein [Arsenophonus nasoniae]
Loki_gp16	32.47	194	121	4	12	202	12	198	4e-17	85.1	gi|652428800|ref|WP_026824014.1|	hypothetical protein [Arsenophonus nasoniae]
Loki_gp16	29.08	196	129	3	10	202	10	198	1e-16	84	gi|739069227|ref|WP_036940609.1|;gi|721477604|gb|KGY21190.1|	phage protein [Providencia stuartii]<>phage protein [Providencia stuartii]
Loki_gp16	31.25	192	122	4	11	199	12	196	3e-16	82.8	gi|740412199|ref|WP_038245545.1|;gi|669787991|gb|KFE37347.1|;gi|1102978088|gb|OIX35855.1|;gi|1102978137|gb|OIX35902.1|;gi|1102978279|gb|OIX36039.1|;gi|1102989441|gb|OIX46272.1|;gi|1102989830|gb|OIX46648.1|;gi|1102997772|gb|OIX54344.1|;gi|1102998664|gb|OIX55216.1|;gi|1103000022|gb|OIX56553.1|;gi|1103538259|gb|OJB93715.1|;gi|1103552421|gb|OJC07549.1|;gi|1103555634|gb|OJC10668.1|;gi|1103556302|gb|OJ…	hypothetical protein [Yersinia ruckeri]<>hypothetical protein nADLYRO1b_3306 [Yersinia ruckeri]<>hypothetical protein AXW20_09855 [Yersinia ruckeri]<>hypothetical protein AXW19_09830 [Yersinia ruckeri]<>hypothetical protein AXW18_09850 [Yersinia ruckeri]<>hypothetical protein AXW21_09870 [Yersinia ruckeri]<>hypothetical protein AXW23_09840 [Yersinia ruckeri]<>hypothetical protein AXW24_09855 [Yer…
Loki_gp16	29.9	194	126	4	9	199	10	196	3e-16	82.8	gi|644962292|ref|WP_025383047.1|;gi|588287640|gb|AHK20376.1|;gi|802318954|emb|CFQ72155.1|	hypothetical protein [Yersinia similis]<>hypothetical protein BF17_14490 [Yersinia similis]<>Uncharacterised protein [Yersinia similis]
Loki_gp16	31.28	195	120	5	12	201	13	198	5e-16	82	gi|739023773|ref|WP_036904973.1|;gi|721497048|gb|KGY40569.1|	hypothetical protein [Proteus mirabilis]<>phage protein [Proteus mirabilis]
Loki_gp16	31.79	195	119	5	12	201	13	198	6e-16	82	gi|1130904332|ref|WP_075674150.1|	hypothetical protein [Proteus sp. H24]
Loki_gp16	31.28	195	120	5	12	201	13	198	8e-16	81.6	gi|1098551842|ref|WP_071233554.1|;gi|1095485427|gb|OHY48064.1|	hypothetical protein [Proteus mirabilis]<>hypothetical protein BBX45_10315 [Proteus mirabilis]
Loki_gp16	29.38	194	127	4	9	199	10	196	9e-16	81.6	gi|910821644|ref|WP_050117059.1|;gi|893158654|emb|CNL00081.1|	hypothetical protein [Yersinia pseudotuberculosis]<>Uncharacterised protein [Yersinia pseudotuberculosis]
Loki_gp16	31.28	195	120	5	12	201	13	198	1e-15	81.3	gi|739019838|ref|WP_036901058.1|;gi|721485759|gb|KGY29337.1|;gi|1097634803|emb|SFH56741.1|	hypothetical protein [Proteus mirabilis]<>phage protein [Proteus mirabilis]<>hypothetical protein SAMN04487853_1325 [Proteus mirabilis]
Loki_gp16	31.44	194	123	4	12	202	11	197	1e-15	81.3	gi|577060026|gb|EUC97205.1|	hypothetical protein HMPREF1567_1491 [Providencia alcalifaciens PAL-2]
Loki_gp16	31.28	195	120	5	12	201	13	198	1e-15	81.3	gi|988881536|ref|WP_060961288.1|;gi|1100285730|gb|OIK55192.1|	hypothetical protein [Proteus mirabilis]<>hypothetical protein BE839_06525 [Proteus mirabilis]
Loki_gp16	31.44	194	123	4	12	202	12	198	1e-15	81.3	gi|739107895|ref|WP_036978079.1|	hypothetical protein [Providencia alcalifaciens]
Loki_gp16	31.28	195	120	5	12	201	13	198	2e-15	80.9	gi|739024080|ref|WP_036905277.1|;gi|721497686|gb|KGY41207.1|	hypothetical protein [Proteus mirabilis]<>phage protein [Proteus mirabilis]
Loki_gp16	31.79	195	119	5	12	201	13	198	2e-15	80.5	gi|1114045125|ref|WP_072063033.1|;gi|857585601|emb|CRL63951.1|;gi|857586686|emb|CRL60107.1|	hypothetical protein [Proteus vulgaris]<>hypothetical protein BN1804_02755 [Proteus vulgaris]<>hypothetical protein BN1804_00754 [Proteus vulgaris]
Loki_gp16	31.28	195	120	5	12	201	13	198	3e-15	80.1	gi|516438353|ref|WP_017827265.1|;gi|1028068222|gb|OAH92782.1|	hypothetical protein [Proteus mirabilis]<>hypothetical protein AZH52_10260 [Proteus mirabilis]
Loki_gp16	28.87	194	128	4	9	199	10	196	4e-15	80.1	gi|912959357|ref|WP_050321341.1|;gi|813842365|emb|CNI98030.1|;gi|893416249|emb|CNE30375.1|	hypothetical protein [Yersinia pseudotuberculosis]<>Uncharacterised protein [Yersinia pseudotuberculosis]<>Uncharacterised protein [Yersinia pseudotuberculosis]
Loki_gp16	31.44	194	123	4	12	202	12	198	1e-14	79	gi|739105060|ref|WP_036975549.1|	hypothetical protein [Providencia alcalifaciens]
Loki_gp16	31.44	194	123	4	12	202	11	197	1e-14	78.6	gi|573504502|gb|ETT04824.1|;gi|577058972|gb|EUC96259.1|;gi|577065918|gb|EUD02762.1|	hypothetical protein HMPREF1562_2318 [Providencia alcalifaciens F90-2004]<>hypothetical protein HMPREF1567_1486 [Providencia alcalifaciens PAL-2]<>hypothetical protein HMPREF1565_1560 [Providencia alcalifaciens RIMD 1656011]
Loki_gp16	31.06	161	104	3	12	172	10	163	1e-14	78.6	gi|849060487|ref|YP_009151960.1|;gi|971747743|ref|YP_009201598.1|;gi|701946787|gb|AIW03879.1|;gi|936910478|emb|CUL01093.1|	hypothetical protein CPT_Seurat16 [Escherichia phage Seurat]<>unnamed protein product [Escherichia phage slur01]<>hypothetical protein CPT_Seurat16 [Escherichia phage Seurat]<>unnamed protein product [Escherichia phage slur01]
Loki_gp16	31.06	161	104	3	12	172	10	163	1e-14	78.6	gi|971742354|ref|YP_009196809.1|;gi|768214057|gb|AJT60500.1|	tail protein [Escherichia phage CAjan]<>tail protein [Escherichia phage CAjan]
Loki_gp16	31.06	161	104	3	12	172	10	163	1e-14	78.2	gi|1049308762|gb|ANY29809.1|	hypothetical protein [Escherichia phage Greed]
Loki_gp16	30.81	172	112	3	12	183	11	175	4e-14	77	gi|414093840|gb|EKT55510.1|	phage protein [Providencia sneebia DSM 19967]
Loki_gp16	32.45	151	95	2	11	161	11	154	5e-14	77	gi|1124643922|ref|WP_074924492.1|;gi|1097634793|emb|SFH57572.1|	hypothetical protein [Proteus mirabilis]<>hypothetical protein SAMN04487853_13317 [Proteus mirabilis]
Loki_gp16	31.41	191	121	3	12	199	12	195	5e-14	76.6	gi|749611825|ref|WP_040233602.1|	hypothetical protein [Citrobacter pasteurii]
Loki_gp16	32.45	151	95	2	11	161	11	154	6e-14	76.6	gi|1114045964|ref|WP_072063872.1|;gi|857585644|emb|CRL62407.1|	hypothetical protein [Proteus vulgaris]<>hypothetical protein BN1804_01936 [Proteus vulgaris]
Loki_gp16	31.87	182	114	4	21	199	21	195	7e-14	76.6	gi|983401355|ref|WP_060569260.1|;gi|960743213|gb|KSY32917.1|	hypothetical protein [Citrobacter sp. 50677481]<>hypothetical protein APU02_04400 [Citrobacter sp. 50677481]
Loki_gp16	29.32	191	125	4	12	199	13	196	8e-14	76.3	gi|910961092|ref|WP_050146139.1|;gi|893583368|emb|CNI09588.1|	hypothetical protein [Yersinia frederiksenii]<>Uncharacterised protein [Yersinia frederiksenii]
Loki_gp16	30.21	192	124	4	11	199	11	195	9e-14	76.3	gi|1092535157|ref|WP_070518361.1|;gi|1081374129|gb|OFV11332.1|	hypothetical protein [Salmonella sp. HMSC13B08]<>hypothetical protein HMPREF3126_14600 [Salmonella sp. HMSC13B08]
Loki_gp16	31.33	166	107	3	18	183	4	162	9e-14	75.9	gi|762989282|ref|WP_043892876.1|	hypothetical protein [Providencia sneebia]
Loki_gp16	31.41	191	121	4	12	199	12	195	1e-13	75.9	gi|992382763|ref|WP_061069757.1|;gi|991890034|gb|AMG53253.1|	hypothetical protein [Citrobacter amalonaticus]<>hypothetical protein AL524_09230 [Citrobacter amalonaticus]
Loki_gp16	34.78	161	102	3	23	181	26	185	2e-13	75.9	gi|1016501515|ref|WP_063088189.1|;gi|1016454225|gb|KZC99686.1|	hypothetical protein [Thalassospira sp. MCCC 1A02898]<>hypothetical protein AUQ41_08385 [Thalassospira sp. MCCC 1A02898]
Loki_gp16	28.21	156	107	2	12	167	14	164	2e-13	75.5	gi|589890604|ref|YP_009006460.1|;gi|583928000|gb|AHI61256.1|	hypothetical protein SHOU24_59 [Vibrio phage SHOU24]<>hypothetical protein SHOU24_59 [Vibrio phage SHOU24]
Loki_gp16	32.29	192	118	5	12	199	12	195	3e-13	74.7	gi|763411844|ref|WP_044268228.1|;gi|666375455|gb|KEY45387.1|	hypothetical protein [Citrobacter amalonaticus]<>hypothetical protein DQ02_21195 [Citrobacter amalonaticus]
Loki_gp16	31.09	193	123	4	12	201	12	197	3e-13	74.7	gi|992390261|ref|WP_061077251.1|;gi|991931127|gb|AMG94332.1|	hypothetical protein [Citrobacter amalonaticus]<>hypothetical protein AL479_18450 [Citrobacter amalonaticus]
Loki_gp16	30.1	206	122	6	9	202	10	205	3e-13	74.7	gi|918358599|ref|WP_052412758.1|;gi|684614208|dbj|GAL18536.1|	hypothetical protein [Vibrio maritimus]<>hypothetical protein JCM19235_1959 [Vibrio maritimus]
Loki_gp16	31.79	151	96	2	11	161	11	154	4e-13	74.7	gi|1063267917|ref|WP_069368420.1|;gi|1063066765|gb|ODQ06382.1|;gi|1070220342|gb|OEI93923.1|;gi|1070235674|gb|OEJ07033.1|	MULTISPECIES: hypothetical protein [Shigella]<>hypothetical protein BGK50_18220 [Shigella sp. FC130]<>hypothetical protein BHE86_16965 [Shigella sp. FC1655]<>hypothetical protein BHE89_05570 [Shigella sp. FC1967]
Loki_gp16	28.8	191	126	4	12	199	13	196	4e-13	74.3	gi|912864450|ref|WP_050299838.1|;gi|893273684|emb|CNC23988.1|	hypothetical protein [Yersinia frederiksenii]<>Uncharacterised protein [Yersinia frederiksenii]
Loki_gp16	30.46	151	98	2	12	162	12	155	7e-13	73.9	gi|831646668|gb|KLU19425.1|	phage protein [Proteus mirabilis]
Loki_gp16	30.46	151	98	2	12	162	12	155	1e-12	73.6	gi|1130902812|ref|WP_075672641.1|	hypothetical protein [Proteus sp. H24]
Loki_gp16	30.37	191	123	4	12	199	12	195	1e-12	73.2	gi|851921652|ref|WP_048217932.1|;gi|838573265|gb|KLV57764.1|	hypothetical protein [Citrobacter sp. MGH103]<>hypothetical protein SK33_00427 [Citrobacter sp. MGH103]
Loki_gp16	29.19	161	107	2	12	172	12	165	2e-12	72.8	gi|896199547|ref|WP_049206480.1|;gi|987439415|gb|KXC00070.1|	hypothetical protein [Proteus mirabilis]<>hypothetical protein HMPREF3203_02450 [Proteus mirabilis]
Loki_gp16	27.84	194	130	4	9	199	10	196	3e-12	72.4	gi|939336564|ref|WP_054882679.1|;gi|811543030|emb|CNE63545.1|	hypothetical protein [Yersinia rohdei]<>Uncharacterised protein [Yersinia rohdei]
Loki_gp16	27.97	143	98	1	25	167	23	160	3e-12	72	gi|504424408|ref|WP_014611510.1|;gi|319427998|gb|ADV56072.1|;gi|319428238|gb|ADV56312.1|	hypothetical protein [Shewanella putrefaciens]<>hypothetical protein Sput200_3693 [Shewanella putrefaciens 200]<>hypothetical protein Sput200_3953 [Shewanella putrefaciens 200]
Loki_gp16	30.37	191	123	4	12	199	12	195	4e-12	72	gi|489938394|ref|WP_003841701.1|;gi|411770968|gb|EKS54696.1|;gi|588299814|gb|EXF29116.1|;gi|668709953|gb|KFB95734.1|;gi|689845073|dbj|GAL39606.1|;gi|1004510760|gb|KYC14517.1|;gi|1050864633|gb|ANZ86830.1|	MULTISPECIES: hypothetical protein [Citrobacter freundii complex]<>phage protein [Citrobacter freundii ATCC 8090 = MTCC 1658]<>hypothetical protein V172_17300 [Citrobacter freundii RLS1]<>hypothetical protein GCFR_02989 [Citrobacter freundii ATCC 8090 = MTCC 1658]<>hypothetical protein CIFRE_10_00520 [Citrobacter freundii NBRC 12681]<>hypothetical protein WM45_23620 [Citrobacter sp. AATXR]<>hypot…
Loki_gp16	31.13	151	97	2	11	161	11	154	7e-12	71.2	gi|1036668498|ref|WP_064720824.1|;gi|1033972578|gb|OAT45357.1|	hypothetical protein [Proteus hauseri]<>hypothetical protein M997_2905 [Proteus hauseri ATCC 700826]
Loki_gp16	29.53	193	126	4	12	201	12	197	1e-11	70.9	gi|919920908|ref|WP_052908776.1|;gi|911540984|gb|KNN82385.1|;gi|912231241|gb|KNV20178.1|;gi|1046027996|gb|OCI45060.1|;gi|1131475487|gb|OLW75337.1|	hypothetical protein [Salmonella enterica]<>hypothetical protein AEV27_21590 [Salmonella enterica subsp. enterica serovar Infantis]<>hypothetical protein AEW91_18760 [Salmonella enterica subsp. enterica serovar Infantis]<>hypothetical protein BBC47_09205 [Salmonella enterica subsp. enterica serovar Infantis]<>hypothetical protein Y073_01225 [Salmonella enterica subsp. enterica serovar Infantis st…
Loki_gp16	30.37	191	123	4	12	199	12	195	1e-11	70.9	gi|970538357|ref|WP_058806112.1|;gi|969350302|gb|KUD76430.1|	hypothetical protein [Salmonella enterica]<>phage protein [Salmonella enterica subsp. enterica serovar Kentucky]
Loki_gp16	30.93	194	122	5	12	201	12	197	1e-11	70.9	gi|754934812|ref|WP_042291540.1|	hypothetical protein [Citrobacter sedlakii]
Loki_gp16	30.37	191	123	4	12	199	12	195	1e-11	70.5	gi|746480120|ref|WP_039517942.1|;gi|735746253|gb|KHP16642.1|	hypothetical protein [Salmonella enterica]<>phage protein [Salmonella enterica subsp. enterica]
Loki_gp16	28.57	161	108	2	12	172	12	165	1e-11	70.5	gi|529248917|ref|WP_020946073.1|;gi|529188948|gb|AGS60708.1|	hypothetical protein [Proteus mirabilis]<>phage protein [Proteus mirabilis BB2000]
Loki_gp16	29.84	191	124	4	12	199	12	195	2e-11	70.1	gi|1103722805|ref|WP_071684492.1|;gi|1103056334|gb|OIY05079.1|;gi|1103203047|gb|OIZ48595.1|	hypothetical protein [Citrobacter freundii]<>hypothetical protein BED43_25255 [Citrobacter freundii]<>hypothetical protein BEH74_25145 [Citrobacter freundii]
Loki_gp16	28.57	161	108	2	12	172	12	165	2e-11	70.1	gi|501336159|ref|WP_012367794.1|;gi|194682309|emb|CAR42082.1|	hypothetical protein [Proteus mirabilis]<>phage protein [Proteus mirabilis HI4320]
Loki_gp16	29.84	191	124	4	12	199	12	195	2e-11	70.1	gi|817709068|ref|WP_046671177.1|;gi|816228365|gb|KKJ87195.1|	hypothetical protein [Citrobacter freundii]<>phage protein [Citrobacter freundii]
Loki_gp16	29.53	193	126	4	12	201	12	197	2e-11	70.1	gi|952987436|ref|WP_057951278.1|	hypothetical protein [Salmonella enterica]
Loki_gp16	29.84	191	124	4	12	199	12	195	4e-11	69.3	gi|1028867295|ref|WP_064035138.1|	hypothetical protein [Salmonella enterica]
Loki_gp16	28.05	164	111	3	10	173	11	167	5e-11	68.9	gi|33770525|ref|NP_892062.1|;gi|33636108|emb|CAD91777.1|	hypothetical protein PY54p16 [Yersinia phage PY54]<>hypothetical protein [Yersinia phage PY54]
Loki_gp16	28.57	161	108	2	12	172	12	165	6e-11	68.9	gi|1016535490|ref|WP_063109146.1|	hypothetical protein [Proteus mirabilis]
Loki_gp16	30.37	191	123	4	12	199	12	195	6e-11	68.6	gi|498720497|ref|WP_010835817.1|;gi|484818736|emb|CCR44443.1|;gi|553437195|gb|ESB62331.1|;gi|677790979|gb|KFT09645.1|;gi|677825719|gb|KFT42384.1|;gi|677891490|gb|KFU04405.1|;gi|677899879|gb|KFU12353.1|;gi|733587281|emb|CEI42591.1|;gi|735815182|gb|KHP84720.1|;gi|1005389940|gb|AKF88576.2|;gi|1018942776|gb|AMY84204.1|	hypothetical protein [Salmonella enterica]<>Conserved hypothetical phage protein [Salmonella enterica subsp. enterica serovar Agona str. 63.H.87]<>phage protein [Salmonella enterica subsp. enterica serovar Muenster str. 660]<>hypothetical protein JG32_19445 [Salmonella enterica subsp. enterica serovar Bareilly str. CFSAN000227]<>hypothetical protein SEEB0216_22415 [Salmonella enterica subsp. ente…
Loki_gp16	30.37	191	123	4	12	199	12	195	6e-11	68.6	gi|446201620|ref|WP_000279475.1|;gi|353651952|gb|EHC93919.1|;gi|554358497|gb|ESH95754.1|;gi|758747207|gb|KIV44523.1|;gi|758747405|gb|KIV44720.1|;gi|919860845|gb|KOK96800.1|;gi|1004439864|gb|KYB49411.1|;gi|1004441918|gb|KYB51403.1|;gi|1004443033|gb|KYB52490.1|;gi|1004453285|gb|KYB62427.1|;gi|1004457499|gb|KYB66494.1|;gi|1004459528|gb|KYB68400.1|;gi|1004463518|gb|KYB72154.1|;gi|1004471697|gb|KYB798…	hypothetical protein [Salmonella enterica]<>hypothetical protein LTSEUGA_1426 [Salmonella enterica subsp. enterica serovar Uganda str. R8-3404]<>phage protein [Salmonella enterica subsp. enterica serovar Agona str. 632182-2]<>phage protein [Salmonella enterica subsp. enterica]<>phage protein [Salmonella enterica subsp. enterica]<>hypothetical protein AEX18_16245 [Salmonella enterica subsp. enteri…
Loki_gp16	30.37	191	123	4	12	199	12	195	6e-11	68.6	gi|555273031|ref|WP_023252581.1|;gi|554422318|gb|ESJ48594.1|;gi|554422680|gb|ESJ48855.1|;gi|969298454|gb|KUD25641.1|;gi|1020318418|gb|AMZ07975.1|	hypothetical protein [Salmonella enterica]<>phage protein [Salmonella enterica subsp. enterica serovar Cubana str. CFSAN001083]<>phage protein [Salmonella enterica subsp. enterica serovar Cubana str. CFSAN001083]<>phage protein [Salmonella enterica subsp. enterica serovar Senftenberg]<>hypothetical protein AW53_14550 [Salmonella enterica subsp. enterica serovar Anatum str. USDA-ARS-USMARC-1677]
Loki_gp16	30.43	184	118	4	21	201	21	197	6e-11	68.6	gi|555228968|ref|WP_023216677.1|;gi|554186443|gb|ESG25378.1|;gi|953770201|gb|ALO83263.1|;gi|953774860|gb|ALO87918.1|	hypothetical protein [Salmonella enterica]<>phage protein [Salmonella enterica subsp. enterica serovar Meleagridis str. 0047]<>hypothetical protein AS587_06625 [Salmonella enterica subsp. enterica serovar Anatum]<>hypothetical protein AS586_06485 [Salmonella enterica subsp. enterica serovar Anatum]
Loki_gp16	30.37	191	123	4	12	199	12	195	7e-11	68.6	gi|446651979|ref|WP_000729325.1|;gi|363568980|gb|EHL52946.1|;gi|379982841|emb|CCF91007.1|;gi|523818177|gb|AGQ73458.1|;gi|554057296|gb|ESF01899.1|;gi|554270871|gb|ESH06867.1|;gi|560203402|gb|ESV49706.1|;gi|911039295|gb|KNI14147.1|;gi|911101955|gb|KNI72296.1|;gi|911217823|gb|KNK81044.1|;gi|911362857|gb|KNM17046.1|;gi|911411821|gb|KNM62594.1|;gi|911623374|gb|KNO59340.1|;gi|911727168|gb|KNP56435.1|;g…	hypothetical protein [Salmonella enterica]<>phage protein [Salmonella enterica subsp. enterica serovar Montevideo str. SARB30]<>putative uncharacterized protein [Salmonella enterica subsp. enterica serovar Senftenberg str. SS209]<>hypothetical protein CFSAN002050_16030 [Salmonella enterica subsp. enterica serovar Cubana str. CFSAN002050]<>phage protein [Salmonella enterica subsp. enterica serovar…
Loki_gp16	30.05	193	125	4	12	201	26	211	8e-11	68.6	gi|353648066|gb|EHC91041.1|	hypothetical protein LTSESEN_1644 [Salmonella enterica subsp. enterica serovar Senftenberg str. A4-543]
Loki_gp16	29.17	192	126	4	11	199	11	195	9e-11	68.2	gi|566073826|ref|WP_023993426.1|;gi|564964225|gb|ETE50897.1|;gi|735704355|gb|KHO75113.1|;gi|735710609|gb|KHO81296.1|;gi|967617151|gb|KTM65164.1|;gi|967652247|gb|KTM99528.1|;gi|974966398|gb|KUR45048.1|;gi|1127370257|gb|APR91659.1|;gi|1127382550|gb|APS03947.1|;gi|1127386938|gb|APS08333.1|;gi|1127390246|gb|APS11639.1|	hypothetical protein [Salmonella enterica]<>phage protein [Salmonella enterica subsp. enterica serovar Infantis str. 119944]<>phage protein [Salmonella enterica subsp. enterica]<>phage protein [Salmonella enterica subsp. enterica]<>phage protein [Salmonella enterica]<>phage protein [Salmonella enterica]<>hypothetical protein ASO17_06770 [Salmonella enterica subsp. enterica serovar Infantis]<>hypo…
Loki_gp16	30.05	193	125	4	12	201	26	211	1e-10	68.6	gi|451937779|gb|AGF88075.1|	hypothetical protein SP016_00100 [Salmonella phage FSL SP-016]
Loki_gp16	29.67	182	118	4	21	199	21	195	1e-10	67.8	gi|985629058|ref|WP_060855144.1|;gi|985306018|gb|KWZ90665.1|	hypothetical protein [Citrobacter freundii]<>hypothetical protein HMPREF3212_02490 [Citrobacter freundii]
Loki_gp16	28.79	198	132	5	3	199	4	193	1e-10	67.8	gi|1123480895|ref|WP_074211113.1|;gi|1116047140|emb|SIN79720.1|;gi|1116049417|emb|SIN66631.1|;gi|1116053238|emb|SIO33801.1|	hypothetical protein [Halomonas meridiana]<>hypothetical protein SAMN05878438_3609 [Halomonas meridiana]<>hypothetical protein SAMN05878249_2173 [Halomonas meridiana]<>hypothetical protein SAMN05878442_2434 [Halomonas meridiana]
Loki_gp16	29.69	192	125	4	11	199	11	195	1e-10	67.8	gi|1062659624|ref|WP_069325441.1|	hypothetical protein [Citrobacter sp. CFSAN044567]
Loki_gp16	28.57	161	108	2	12	172	12	165	2e-10	67.4	gi|516224389|ref|WP_017628352.1|;gi|955367517|gb|KSA04997.1|;gi|960432527|gb|KSW14359.1|;gi|960709515|gb|KSY00152.1|;gi|1026618336|gb|AND13333.1|;gi|1033661599|gb|OAS31780.1|;gi|1033662903|gb|OAS33054.1|	hypothetical protein [Proteus mirabilis]<>hypothetical protein AC442_16800 [Proteus mirabilis]<>phage protein [Proteus mirabilis]<>hypothetical protein APT96_02765 [Proteus mirabilis]<>hypothetical protein AOUC001_10725 [Proteus mirabilis]<>hypothetical protein A6V32_04720 [Proteus mirabilis]<>hypothetical protein A6V31_15050 [Proteus mirabilis]
Loki_gp16	29.94	167	115	2	14	180	11	175	2e-10	67	gi|1094611779|emb|SEO90257.1|	hypothetical protein SAMN04490248_11594 [Salinihabitans flavidus]
Loki_gp16	29.17	192	126	4	11	199	11	195	2e-10	67	gi|895896473|ref|WP_048997958.1|	hypothetical protein [Citrobacter freundii]
Loki_gp16	29.32	191	125	4	12	199	12	195	3e-10	67	gi|851929275|ref|WP_048221289.1|;gi|838582498|gb|KLV66955.1|	hypothetical protein [Citrobacter sp. MGH106]<>hypothetical protein SK36_01674 [Citrobacter sp. MGH106]
Loki_gp16	30.77	182	116	4	21	199	21	195	3e-10	67	gi|763264500|ref|WP_044128716.1|;gi|677804489|gb|KFT22193.1|;gi|689478710|gb|KGE40954.1|;gi|980997777|dbj|GAS40726.1|;gi|981001648|dbj|GAR16181.1|;gi|981200307|dbj|GAR60800.1|	hypothetical protein [Salmonella enterica]<>hypothetical protein EC23_21350 [Salmonella enterica subsp. enterica serovar Bareilly str. CFSAN000219]<>hypothetical protein SEEB0220_26100 [Salmonella enterica subsp. enterica serovar Bareilly str. CFSAN000220]<>hypothetical protein NGUA33_01200 [Salmonella enterica]<>hypothetical protein NGUA05_02252 [Salmonella enterica]<>hypothetical protein NGUA15…
Loki_gp16	30.54	167	114	2	13	179	10	174	3e-10	66.6	gi|497495825|ref|WP_009810023.1|;gi|85823494|gb|EAQ43703.1|	hypothetical protein [Roseobacter sp. MED193]<>hypothetical protein MED193_12568 [Roseobacter sp. MED193]
Loki_gp16	29.67	182	118	4	21	199	21	195	3e-10	66.6	gi|817108157|ref|WP_046481424.1|;gi|449328504|gb|AGE94804.1|	hypothetical protein [Citrobacter amalonaticus]<>phage protein [Citrobacter amalonaticus Y19]
Loki_gp16	27.95	161	109	2	12	172	12	165	4e-10	66.6	gi|739066185|ref|WP_036937594.1|;gi|685171475|gb|KGA59132.1|	hypothetical protein [Proteus vulgaris]<>hypothetical protein DR95_1152 [Proteus vulgaris]
Loki_gp16	29.33	150	99	2	12	161	12	154	4e-10	65.9	gi|490362740|ref|WP_004242491.1|;gi|227164674|gb|EEI49537.1|	hypothetical protein, partial [Proteus mirabilis]<>hypothetical protein HMPREF0693_0529, partial [Proteus mirabilis ATCC 29906]
Loki_gp16	27.95	161	109	2	12	172	12	165	4e-10	66.2	gi|1114044725|ref|WP_072062633.1|;gi|857587513|emb|CRL59021.1|	hypothetical protein [Proteus vulgaris]<>hypothetical protein BN1804_00193 [Proteus vulgaris]
Loki_gp16	27.95	161	109	2	12	172	12	165	5e-10	66.2	gi|896213076|ref|WP_049217140.1|;gi|955369647|gb|KSA07026.1|;gi|1026617354|gb|AND12351.1|	hypothetical protein [Proteus mirabilis]<>hypothetical protein AC442_06140 [Proteus mirabilis]<>hypothetical protein AOUC001_05475 [Proteus mirabilis]
Loki_gp16	28.8	191	126	4	12	199	12	195	5e-10	66.2	gi|895900883|ref|WP_049001816.1|	hypothetical protein [Citrobacter freundii]
Loki_gp16	27.95	161	109	2	12	172	12	165	6e-10	66.2	gi|896205466|ref|WP_049211584.1|	hypothetical protein [Proteus mirabilis]
Loki_gp16	27.95	161	109	2	12	172	12	165	7e-10	65.9	gi|225205384|gb|EEG87738.1|	hypothetical protein PROPEN_00039 [Proteus penneri ATCC 35198]
Loki_gp16	27.95	161	109	2	12	172	12	165	7e-10	65.9	gi|739063778|ref|WP_036935189.1|;gi|685170886|gb|KGA58555.1|;gi|685233243|gb|KGA89865.1|	MULTISPECIES: hypothetical protein [Proteus]<>hypothetical protein DR95_2792 [Proteus vulgaris]<>hypothetical protein DR94_1223 [Proteus mirabilis]
Loki_gp16	27.95	161	109	2	12	172	12	165	9e-10	65.5	gi|739013316|ref|WP_036894772.1|;gi|721502840|gb|KGY46332.1|	hypothetical protein [Proteus mirabilis]<>phage protein [Proteus mirabilis]
Loki_gp16	29.12	182	119	4	21	199	21	195	1e-09	65.5	gi|1046456405|emb|SBW25589.1|	hypothetical protein BN4901_2581 [Citrobacter europaeus]
Loki_gp16	27.95	161	109	2	12	172	12	165	1e-09	65.5	gi|739037122|ref|WP_036918208.1|;gi|721558817|gb|KGZ02141.1|;gi|1100285230|gb|OIK54771.1|	hypothetical protein [Proteus mirabilis]<>phage protein [Proteus mirabilis]<>hypothetical protein BE839_08130 [Proteus mirabilis]
Loki_gp16	27.95	161	109	2	12	172	12	165	1e-09	65.1	gi|896191939|ref|WP_049200983.1|	hypothetical protein [Proteus mirabilis]
Loki_gp16	27.95	161	109	2	12	172	12	165	1e-09	65.1	gi|490371965|ref|WP_004251569.1|;gi|404596577|gb|EKA97097.1|;gi|702065685|gb|KGQ17421.1|;gi|721485701|gb|KGY29279.1|;gi|721498675|gb|KGY42196.1|;gi|721595980|gb|KGZ39248.1|;gi|806987113|gb|KKC60073.1|;gi|1017167867|gb|KZE55753.1|	hypothetical protein [Proteus mirabilis]<>hypothetical protein HMPREF1310_02242 [Proteus mirabilis WGLW4]<>phage protein [Proteus mirabilis]<>phage protein [Proteus mirabilis]<>phage protein [Proteus mirabilis]<>phage protein [Proteus mirabilis]<>phage protein [Proteus mirabilis]<>hypothetical protein AV652_17315 [Proteus mirabilis]
Loki_gp16	27.47	182	123	5	19	199	18	191	2e-09	64.7	gi|765300479|ref|WP_044628148.1|;gi|764090318|gb|KJD20509.1|	hypothetical protein [Halomonas meridiana]<>hypothetical protein VE30_01955 [Halomonas meridiana]
Loki_gp17	100	900	0	0	1	900	1	900	0	1852	gi|949419308|emb|CUS06478.1|	hypothetical protein [unclassified Siphoviridae]
Loki_gp17	80.95	903	169	2	1	900	1	903	0	1551	gi|589892165|ref|YP_009008530.1|;gi|583926719|gb|AHI60025.1|	putative capsid and scaffold protein [Acinetobacter phage IME_AB3]<>putative capsid and scaffold protein [Acinetobacter phage IME_AB3]
Loki_gp17	55.78	303	124	4	413	708	111	410	2e-103	336	gi|119952233|ref|YP_950542.1|;gi|117650952|gb|ABK54425.1|	gp64 [Escherichia phage N4]<>gp64 [Escherichia phage N4]
Loki_gp17	55.52	299	128	3	414	710	96	391	5e-102	344	gi|916776376|ref|WP_051383432.1|	hypothetical protein [Bradyrhizobium sp. WSM3983]
Loki_gp17	32.1	754	396	14	10	719	8	689	7e-100	343	gi|1054762676|ref|WP_066526717.1|	MULTISPECIES: hypothetical protein [Alphaproteobacteria]
Loki_gp17	50.96	312	145	3	403	707	97	407	3e-95	315	gi|849120806|ref|YP_009148445.1|;gi|699753111|gb|AIU44336.1|	capsid and scaffold protein [Delftia phage RG-2014]<>capsid and scaffold protein [Delftia phage RG-2014]
Loki_gp17	49.54	323	142	3	410	712	118	439	7e-95	326	gi|985770127|ref|YP_009226446.1|;gi|921955987|gb|ALA45442.1|	hypothetical protein ADP64_000028 [Achromobacter phage phiAxp-2]<>hypothetical protein ADP64_000028 [Achromobacter phage phiAxp-2]
Loki_gp17	40.38	416	236	6	303	712	163	572	2e-93	328	gi|635631730|ref|WP_024278627.1|	hypothetical protein [Xanthobacter sp. 126]
Loki_gp17	33.77	77	51	0	13	89	10	86	9e-08	67.4	gi|635631730|ref|WP_024278627.1|	hypothetical protein [Xanthobacter sp. 126]
Loki_gp17	49.06	320	154	4	397	708	99	417	3e-92	307	gi|971821371|ref|YP_009208720.1|;gi|921956083|gb|ALA45537.1|	hypothetical protein ADP65_00068 [Achromobacter phage phiAxp-3]<>hypothetical protein ADP65_00068 [Achromobacter phage phiAxp-3]
Loki_gp17	39.01	405	240	4	322	726	278	675	1e-82	296	gi|916544858|ref|WP_051151949.1|	hypothetical protein [Fodinicurvata sediminis]
Loki_gp17	34.88	86	54	1	6	89	2	87	0.007	51.6	gi|916544858|ref|WP_051151949.1|	hypothetical protein [Fodinicurvata sediminis]
Loki_gp17	38.36	391	236	3	322	712	274	659	6e-80	288	gi|917002559|ref|WP_051609271.1|	hypothetical protein [Fodinicurvata fenggangensis]
Loki_gp17	34.88	86	54	1	10	93	4	89	0.04	49.3	gi|917002559|ref|WP_051609271.1|	hypothetical protein [Fodinicurvata fenggangensis]
Loki_gp17	39.63	381	218	5	350	729	214	583	3e-78	280	gi|754712305|ref|WP_042087034.1|;gi|654634738|dbj|GAK34246.1|	hypothetical protein [alpha proteobacterium Q-1]<>hypothetical protein AQ1_02143 [alpha proteobacterium Q-1]
Loki_gp17	24.21	190	104	5	17	197	15	173	8e-06	61.2	gi|754712305|ref|WP_042087034.1|;gi|654634738|dbj|GAK34246.1|	hypothetical protein [alpha proteobacterium Q-1]<>hypothetical protein AQ1_02143 [alpha proteobacterium Q-1]
Loki_gp17	36.9	374	220	7	348	721	2	359	9e-71	251	gi|1119677559|ref|WP_072596673.1|;gi|1111598237|gb|API59121.1|	hypothetical protein [Sphingomonas sp. JJ-A5]<>hypothetical protein BSL82_07200 [Sphingomonas sp. JJ-A5]
Loki_gp17	31.55	485	298	10	326	810	227	677	1e-66	249	gi|550933741|ref|WP_022682146.1|	hypothetical protein [Sphingobium sp. YL23]
Loki_gp17	21.92	292	173	9	20	295	57	309	1e-06	63.5	gi|550933741|ref|WP_022682146.1|	hypothetical protein [Sphingobium sp. YL23]
Loki_gp17	36.09	363	225	3	348	710	213	568	2e-66	247	gi|495878231|ref|WP_008602810.1|;gi|451960071|gb|EMD82486.1|	hypothetical protein [alpha proteobacterium JLT2015]<>hypothetical protein C725_2207 [alpha proteobacterium JLT2015]
Loki_gp17	26.09	230	141	8	18	243	18	222	4e-07	65.1	gi|495878231|ref|WP_008602810.1|;gi|451960071|gb|EMD82486.1|	hypothetical protein [alpha proteobacterium JLT2015]<>hypothetical protein C725_2207 [alpha proteobacterium JLT2015]
Loki_gp17	34.64	384	240	5	325	708	188	560	6e-65	242	gi|728812901|ref|WP_033919489.1|	hypothetical protein [Sphingomonas sp. 37zxx]
Loki_gp17	28.96	221	112	8	14	222	13	200	3e-10	75.5	gi|728812901|ref|WP_033919489.1|	hypothetical protein [Sphingomonas sp. 37zxx]
Loki_gp17	35.62	393	234	6	320	708	190	567	1e-64	243	gi|1119639555|ref|WP_072559888.1|;gi|1110848916|gb|APG63236.1|	hypothetical protein [Sphingopyxis sp. LPB0140]<>hypothetical protein LPB140_11070 [Sphingopyxis sp. LPB0140]
Loki_gp17	24.86	185	111	6	16	197	22	181	2e-05	59.7	gi|1119639555|ref|WP_072559888.1|;gi|1110848916|gb|APG63236.1|	hypothetical protein [Sphingopyxis sp. LPB0140]<>hypothetical protein LPB140_11070 [Sphingopyxis sp. LPB0140]
Loki_gp17	35.75	372	224	6	350	718	228	587	5e-64	238	gi|522106905|ref|WP_020618114.1|	hypothetical protein [Paenibacillus daejeonensis]
Loki_gp17	36.27	375	222	8	348	720	211	570	7e-64	239	gi|991990378|ref|WP_060979486.1|	MULTISPECIES: hypothetical protein [Proteobacteria]
Loki_gp17	27.6	192	101	6	14	197	13	174	4e-10	75.1	gi|991990378|ref|WP_060979486.1|	MULTISPECIES: hypothetical protein [Proteobacteria]
Loki_gp17	36.27	375	222	8	348	720	211	570	7e-64	239	gi|1054291591|ref|WP_066212569.1|	hypothetical protein [Blastomonas sp. CCH5-A3]
Loki_gp17	27.6	192	101	6	14	197	13	174	4e-10	75.1	gi|1054291591|ref|WP_066212569.1|	hypothetical protein [Blastomonas sp. CCH5-A3]
Loki_gp17	33.59	393	231	6	324	710	186	554	3e-63	238	gi|1097593526|emb|SFR97995.1|	TIGR02217 family protein [Sphingomonas sp. S5-249]
Loki_gp17	30.48	187	92	6	15	193	14	170	2e-12	82.8	gi|1097593526|emb|SFR97995.1|	TIGR02217 family protein [Sphingomonas sp. S5-249]
Loki_gp17	33.86	381	238	5	325	705	190	556	3e-63	238	gi|1011988895|ref|WP_062792008.1|	hypothetical protein [Sphingobium chlorophenolicum]
Loki_gp17	24.24	198	105	4	18	204	20	183	7e-05	58.2	gi|1011988895|ref|WP_062792008.1|	hypothetical protein [Sphingobium chlorophenolicum]
Loki_gp17	33.86	381	238	5	325	705	190	556	3e-63	238	gi|739600077|ref|WP_037457554.1|;gi|662351435|gb|KEQ49970.1|	hypothetical protein [Sphingobium chlorophenolicum]<>hypothetical protein BV95_04521 [Sphingobium chlorophenolicum]
Loki_gp17	24.24	198	105	4	18	204	20	183	7e-05	57.8	gi|739600077|ref|WP_037457554.1|;gi|662351435|gb|KEQ49970.1|	hypothetical protein [Sphingobium chlorophenolicum]<>hypothetical protein BV95_04521 [Sphingobium chlorophenolicum]
Loki_gp17	34.92	398	242	8	325	720	188	570	7e-63	237	gi|1054493307|ref|WP_066284791.1|;gi|1088460479|gb|OHC95449.1|	hypothetical protein [Blastomonas sp. CCH1-A6]<>hypothetical protein A2792_06680 [Sphingomonadales bacterium RIFCSPHIGHO2_01_FULL_65_20]
Loki_gp17	27.08	192	102	6	14	197	13	174	2e-09	73.2	gi|1054493307|ref|WP_066284791.1|;gi|1088460479|gb|OHC95449.1|	hypothetical protein [Blastomonas sp. CCH1-A6]<>hypothetical protein A2792_06680 [Sphingomonadales bacterium RIFCSPHIGHO2_01_FULL_65_20]
Loki_gp17	33.25	391	230	7	325	711	12	375	1e-62	232	gi|814992525|gb|KKI22383.1|	hypothetical protein XM50_00710, partial [Sphingomonas sp. Ag1]
Loki_gp17	34.12	381	237	5	325	705	190	556	1e-62	236	gi|503612109|ref|WP_013846185.1|;gi|334100488|gb|AEG47912.1|	hypothetical protein [Sphingobium chlorophenolicum]<>Conserved hypothetical protein CHP02217 [Sphingobium chlorophenolicum L-1]
Loki_gp17	24.75	198	104	4	18	204	20	183	1e-05	60.5	gi|503612109|ref|WP_013846185.1|;gi|334100488|gb|AEG47912.1|	hypothetical protein [Sphingobium chlorophenolicum]<>Conserved hypothetical protein CHP02217 [Sphingobium chlorophenolicum L-1]
Loki_gp17	33.92	398	246	8	325	720	188	570	1e-62	236	gi|563281384|gb|ESZ85967.1|	hypothetical protein Q27BB25_16675 [Blastomonas sp. CACIA14H2]
Loki_gp17	36	75	48	0	15	89	14	88	7e-08	67.8	gi|563281384|gb|ESZ85967.1|	hypothetical protein Q27BB25_16675 [Blastomonas sp. CACIA14H2]
Loki_gp17	33.25	391	230	7	325	711	9	372	2e-62	231	gi|919186810|ref|WP_052742311.1|	hypothetical protein [Sphingomonas sp. Ag1]
Loki_gp17	35.38	359	218	6	348	706	214	558	2e-62	236	gi|1011197107|ref|WP_062117479.1|;gi|998161469|gb|AMK18639.1|	hypothetical protein [Sphingobium sp. MI1205]<>hypothetical protein K663_11295 [Sphingobium sp. MI1205]
Loki_gp17	23.83	193	113	5	18	204	20	184	3e-05	59.3	gi|1011197107|ref|WP_062117479.1|;gi|998161469|gb|AMK18639.1|	hypothetical protein [Sphingobium sp. MI1205]<>hypothetical protein K663_11295 [Sphingobium sp. MI1205]
Loki_gp17	34.29	382	236	6	325	706	191	557	3e-62	235	gi|663823836|ref|WP_030541502.1|;gi|612108155|gb|EZP66355.1|	MULTISPECIES: hypothetical protein [Sphingomonadaceae]<>hypothetical protein BV96_04569 [Sphingomonas paucimobilis]
Loki_gp17	27.23	191	109	8	18	204	20	184	2e-06	63.2	gi|663823836|ref|WP_030541502.1|;gi|612108155|gb|EZP66355.1|	MULTISPECIES: hypothetical protein [Sphingomonadaceae]<>hypothetical protein BV96_04569 [Sphingomonas paucimobilis]
Loki_gp17	35.2	375	225	7	348	714	216	580	5e-62	234	gi|1054991015|ref|WP_066743653.1|;gi|1032130565|gb|OAO02646.1|	hypothetical protein [Sphingomonadales bacterium EhC05]<>hypothetical protein A8B75_11990 [Sphingomonadales bacterium EhC05]
Loki_gp17	30.53	190	103	8	15	200	19	183	1e-09	73.6	gi|1054991015|ref|WP_066743653.1|;gi|1032130565|gb|OAO02646.1|	hypothetical protein [Sphingomonadales bacterium EhC05]<>hypothetical protein A8B75_11990 [Sphingomonadales bacterium EhC05]
Loki_gp17	34.03	382	237	6	325	706	191	557	7e-62	234	gi|665937663|ref|WP_031303710.1|	hypothetical protein [Sphingobium quisquiliarum]
Loki_gp17	27.23	191	109	8	18	204	20	184	2e-06	63.2	gi|665937663|ref|WP_031303710.1|	hypothetical protein [Sphingobium quisquiliarum]
Loki_gp17	34.03	382	237	6	325	706	212	578	1e-61	234	gi|530272682|gb|EQB14998.1|	hypothetical protein L288_00570, partial [Sphingobium quisquiliarum P25]
Loki_gp17	27.23	191	109	8	18	204	41	205	2e-06	63.2	gi|530272682|gb|EQB14998.1|	hypothetical protein L288_00570, partial [Sphingobium quisquiliarum P25]
Loki_gp17	33.67	395	239	7	325	719	189	560	1e-61	233	gi|1094652975|emb|SEJ69481.1|	TIGR02217 family protein [Sphingomonas sp. OV641]
Loki_gp17	23.9	205	115	7	15	210	15	187	3e-07	65.9	gi|1094652975|emb|SEJ69481.1|	TIGR02217 family protein [Sphingomonas sp. OV641]
Loki_gp17	34.85	373	226	7	348	720	211	566	2e-61	233	gi|946852513|ref|WP_055775525.1|;gi|945141272|gb|KQS03540.1|	hypothetical protein [Sphingomonas sp. Leaf357]<>hypothetical protein ASG11_04115 [Sphingomonas sp. Leaf357]
Loki_gp17	24.38	242	129	8	14	246	13	209	6e-05	58.2	gi|946852513|ref|WP_055775525.1|;gi|945141272|gb|KQS03540.1|	hypothetical protein [Sphingomonas sp. Leaf357]<>hypothetical protein ASG11_04115 [Sphingomonas sp. Leaf357]
Loki_gp17	35.48	403	233	10	325	720	186	568	3e-61	232	gi|939713054|ref|WP_054946603.1|;gi|808402057|emb|CDO36842.1|	hypothetical protein [Novosphingobium sp. KN65.2]<>conserved hypothetical protein [Novosphingobium sp. KN65.2]
Loki_gp17	25.58	215	123	5	14	222	13	196	2e-12	82	gi|939713054|ref|WP_054946603.1|;gi|808402057|emb|CDO36842.1|	hypothetical protein [Novosphingobium sp. KN65.2]<>conserved hypothetical protein [Novosphingobium sp. KN65.2]
Loki_gp17	33.42	395	240	7	325	719	189	560	4e-61	231	gi|1055028024|ref|WP_066779303.1|	hypothetical protein [Sphingomonas sp. CCH5-D11]
Loki_gp17	32	75	51	0	15	89	15	89	2e-07	66.2	gi|1055028024|ref|WP_066779303.1|	hypothetical protein [Sphingomonas sp. CCH5-D11]
Loki_gp17	32.98	382	241	5	325	706	195	561	5e-61	232	gi|1054792432|ref|WP_066555626.1|;gi|998165292|gb|AMK22456.1|	hypothetical protein [Sphingobium sp. TKS]<>hypothetical protein K426_07545 [Sphingobium sp. TKS]
Loki_gp17	26.42	193	112	7	18	204	20	188	0.0002	56.6	gi|1054792432|ref|WP_066555626.1|;gi|998165292|gb|AMK22456.1|	hypothetical protein [Sphingobium sp. TKS]<>hypothetical protein K426_07545 [Sphingobium sp. TKS]
Loki_gp17	33.26	448	267	11	264	705	131	552	8e-61	231	gi|822633154|ref|WP_047007023.1|;gi|822586314|gb|KLE31672.1|;gi|1108536000|gb|APE27652.1|	hypothetical protein [Erythrobacter gangjinensis]<>hypothetical protein AAW01_09115 [Erythrobacter gangjinensis]<>Gene Transfer Agent (GTA) ORFG12b [Erythrobacter gangjinensis]
Loki_gp17	26.29	213	114	6	18	217	17	199	3e-12	82	gi|822633154|ref|WP_047007023.1|;gi|822586314|gb|KLE31672.1|;gi|1108536000|gb|APE27652.1|	hypothetical protein [Erythrobacter gangjinensis]<>hypothetical protein AAW01_09115 [Erythrobacter gangjinensis]<>Gene Transfer Agent (GTA) ORFG12b [Erythrobacter gangjinensis]
Loki_gp17	35.77	383	229	7	325	705	189	556	9e-61	231	gi|496284064|ref|WP_008996102.1|;gi|392720822|gb|EIZ78294.1|	hypothetical protein [Novosphingobium sp. Rr 2-17]<>hypothetical protein WSK_3176 [Novosphingobium sp. Rr 2-17]
Loki_gp17	28.77	219	114	6	14	222	13	199	8e-11	77.4	gi|496284064|ref|WP_008996102.1|;gi|392720822|gb|EIZ78294.1|	hypothetical protein [Novosphingobium sp. Rr 2-17]<>hypothetical protein WSK_3176 [Novosphingobium sp. Rr 2-17]
Loki_gp17	35.38	359	218	6	348	706	214	558	1e-60	230	gi|1054763567|ref|WP_066527608.1|;gi|1034622282|gb|ANI78688.1|	hypothetical protein [Sphingobium sp. EP60837]<>hypothetical protein EP837_02285 [Sphingobium sp. EP60837]
Loki_gp17	25.84	209	126	8	18	222	20	203	5e-06	61.6	gi|1054763567|ref|WP_066527608.1|;gi|1034622282|gb|ANI78688.1|	hypothetical protein [Sphingobium sp. EP60837]<>hypothetical protein EP837_02285 [Sphingobium sp. EP60837]
Loki_gp17	34.36	358	223	6	348	705	211	556	2e-60	230	gi|497811776|ref|WP_010125960.1|	hypothetical protein [Sphingomonas sp. KC8]
Loki_gp17	27.57	185	102	8	18	197	17	174	7e-06	61.2	gi|497811776|ref|WP_010125960.1|	hypothetical protein [Sphingomonas sp. KC8]
Loki_gp17	34.75	400	240	10	325	721	187	568	2e-60	230	gi|499734975|ref|WP_011415709.1|;gi|84788705|gb|ABC64887.1|	hypothetical protein [Erythrobacter litoralis]<>hypothetical protein ELI_13975 [Erythrobacter litoralis HTCC2594]
Loki_gp17	29.03	186	106	5	18	202	17	177	5e-12	81.3	gi|499734975|ref|WP_011415709.1|;gi|84788705|gb|ABC64887.1|	hypothetical protein [Erythrobacter litoralis]<>hypothetical protein ELI_13975 [Erythrobacter litoralis HTCC2594]
Loki_gp17	33.69	377	234	7	330	706	197	557	3e-60	229	gi|765344323|ref|WP_044662593.1|;gi|764455744|gb|AJR25858.1|	MULTISPECIES: hypothetical protein [Sphingobium]<>hypothetical protein TZ53_21035 [Sphingobium sp. YBL2]
Loki_gp17	26.06	188	114	6	18	204	20	183	4e-06	62	gi|765344323|ref|WP_044662593.1|;gi|764455744|gb|AJR25858.1|	MULTISPECIES: hypothetical protein [Sphingobium]<>hypothetical protein TZ53_21035 [Sphingobium sp. YBL2]
Loki_gp17	35.94	384	227	9	325	705	189	556	3e-60	229	gi|496104550|ref|WP_008829057.1|;gi|402263708|gb|EJU13606.1|;gi|612116599|gb|EZP74638.1|	MULTISPECIES: hypothetical protein [Sphingomonadaceae]<>hypothetical protein LH128_07924 [Sphingomonas sp. LH128]<>hypothetical protein BV97_04834 [Novosphingobium resinovorum]
Loki_gp17	27.15	221	123	5	14	226	13	203	1e-10	76.6	gi|496104550|ref|WP_008829057.1|;gi|402263708|gb|EJU13606.1|;gi|612116599|gb|EZP74638.1|	MULTISPECIES: hypothetical protein [Sphingomonadaceae]<>hypothetical protein LH128_07924 [Sphingomonas sp. LH128]<>hypothetical protein BV97_04834 [Novosphingobium resinovorum]
Loki_gp17	36.01	361	216	7	348	705	271	619	4e-60	233	gi|446397459|ref|WP_000475314.1|;gi|401266974|gb|EJR73039.1|	hypothetical protein [Bacillus cereus]<>hypothetical protein IK9_05359 [Bacillus cereus VD166]
Loki_gp17	25.4	189	112	7	12	182	32	209	0.008	51.6	gi|446397459|ref|WP_000475314.1|;gi|401266974|gb|EJR73039.1|	hypothetical protein [Bacillus cereus]<>hypothetical protein IK9_05359 [Bacillus cereus VD166]
Loki_gp17	34.82	382	235	6	325	706	191	558	4e-60	229	gi|739610918|ref|WP_037467924.1|;gi|672387300|gb|KFG89028.1|	hypothetical protein [Sphingobium herbicidovorans]<>hypothetical protein BV98_003187 [Sphingobium herbicidovorans NBRC 16415]
Loki_gp17	22.8	193	115	5	18	204	20	184	0.0002	56.6	gi|739610918|ref|WP_037467924.1|;gi|672387300|gb|KFG89028.1|	hypothetical protein [Sphingobium herbicidovorans]<>hypothetical protein BV98_003187 [Sphingobium herbicidovorans NBRC 16415]
Loki_gp17	35.68	384	228	9	325	705	189	556	5e-60	229	gi|1097733842|emb|SFF73987.1|	TIGR02217 family protein [Novosphingobium sp. CF614]
Loki_gp17	25.66	226	120	6	14	226	13	203	5e-10	74.7	gi|1097733842|emb|SFF73987.1|	TIGR02217 family protein [Novosphingobium sp. CF614]
Loki_gp17	33.07	381	241	6	325	705	191	557	6e-60	228	gi|1011145202|ref|WP_062066873.1|;gi|959189050|gb|ALR21773.1|	hypothetical protein [Sphingobium baderi]<>hypothetical protein ATN00_17185 [Sphingobium baderi]
Loki_gp17	26.18	191	111	8	18	204	20	184	0.0001	57	gi|1011145202|ref|WP_062066873.1|;gi|959189050|gb|ALR21773.1|	hypothetical protein [Sphingobium baderi]<>hypothetical protein ATN00_17185 [Sphingobium baderi]
Loki_gp17	33.76	388	243	6	325	708	188	565	7e-60	228	gi|1123472477|ref|WP_074203269.1|;gi|1116031974|emb|SIN59622.1|	hypothetical protein [Sphingorhabdus marina]<>TIGR02217 family protein [Sphingorhabdus marina DSM 22363]
Loki_gp17	27.75	191	112	7	16	204	15	181	1e-06	63.9	gi|1123472477|ref|WP_074203269.1|;gi|1116031974|emb|SIN59622.1|	hypothetical protein [Sphingorhabdus marina]<>TIGR02217 family protein [Sphingorhabdus marina DSM 22363]
Loki_gp17	35.25	383	231	8	325	705	189	556	9e-60	228	gi|1070094256|ref|WP_069708840.1|;gi|1069774237|gb|AOR78004.1|	hypothetical protein [Novosphingobium resinovorum]<>hypothetical protein BES08_15525 [Novosphingobium resinovorum]
Loki_gp17	26.24	221	125	5	14	226	13	203	7e-10	73.9	gi|1070094256|ref|WP_069708840.1|;gi|1069774237|gb|AOR78004.1|	hypothetical protein [Novosphingobium resinovorum]<>hypothetical protein BES08_15525 [Novosphingobium resinovorum]
Loki_gp17	33.26	433	246	9	303	707	331	748	1e-59	228	gi|736677679|ref|WP_034684048.1|;gi|588678436|gb|EXF56653.1|	hypothetical protein [Acinetobacter sp. 1294596]<>hypothetical protein J502_2222 [Acinetobacter sp. 1294596]
Loki_gp17	33.51	382	239	6	325	706	199	565	1e-59	228	gi|820803293|ref|WP_046764549.1|;gi|820039535|gb|KKW91033.1|	hypothetical protein [Sphingobium chungbukense]<>hypothetical protein YP76_15610 [Sphingobium chungbukense]
Loki_gp17	24.35	193	116	7	18	204	24	192	0.003	52.8	gi|820803293|ref|WP_046764549.1|;gi|820039535|gb|KKW91033.1|	hypothetical protein [Sphingobium chungbukense]<>hypothetical protein YP76_15610 [Sphingobium chungbukense]
Loki_gp17	33.98	359	223	6	348	706	214	558	1e-59	228	gi|550933753|ref|WP_022682158.1|	hypothetical protein [Sphingobium sp. YL23]
Loki_gp17	31.94	72	49	0	18	89	20	91	0.0005	55.1	gi|550933753|ref|WP_022682158.1|	hypothetical protein [Sphingobium sp. YL23]
Loki_gp17	36.29	361	215	7	348	705	271	619	2e-59	231	gi|872695109|ref|WP_048547114.1|;gi|859568772|gb|KMP90982.1|	hypothetical protein [Bacillus cereus]<>hypothetical protein TU65_25530 [Bacillus cereus]
Loki_gp17	24.03	233	125	10	24	228	44	252	3	43.1	gi|872695109|ref|WP_048547114.1|;gi|859568772|gb|KMP90982.1|	hypothetical protein [Bacillus cereus]<>hypothetical protein TU65_25530 [Bacillus cereus]
Loki_gp17	32.81	381	242	6	325	705	188	554	2e-59	227	gi|861978393|gb|KMS62474.1|	hypothetical protein V475_07020 [Sphingobium baderi LL03]
Loki_gp17	25.65	191	112	8	18	204	17	181	0.0001	57	gi|861978393|gb|KMS62474.1|	hypothetical protein V475_07020 [Sphingobium baderi LL03]
Loki_gp17	32.81	381	242	6	325	705	191	557	2e-59	227	gi|544827427|ref|WP_021243329.1|;gi|530263737|gb|EQB06334.1|	hypothetical protein [Sphingobium baderi]<>hypothetical protein L485_01535 [Sphingobium baderi LL03]
Loki_gp17	25.65	191	112	8	18	204	20	184	0.0002	56.6	gi|544827427|ref|WP_021243329.1|;gi|530263737|gb|EQB06334.1|	hypothetical protein [Sphingobium baderi]<>hypothetical protein L485_01535 [Sphingobium baderi LL03]
Loki_gp17	35.73	361	217	7	348	705	271	619	2e-59	231	gi|763056509|ref|WP_043938752.1|;gi|756560371|gb|KIQ78380.1|;gi|756562235|gb|KIQ80154.1|	MULTISPECIES: hypothetical protein [Bacillus]<>hypothetical protein RT27_29830 [Bacillus sp. L_1B0_5]<>hypothetical protein RW25_26320 [Bacillus sp. L_1B0_8]
Loki_gp17	26.46	189	109	8	13	182	32	209	0.04	49.3	gi|763056509|ref|WP_043938752.1|;gi|756560371|gb|KIQ78380.1|;gi|756562235|gb|KIQ80154.1|	MULTISPECIES: hypothetical protein [Bacillus]<>hypothetical protein RT27_29830 [Bacillus sp. L_1B0_5]<>hypothetical protein RW25_26320 [Bacillus sp. L_1B0_8]
Loki_gp17	35.1	359	219	6	348	706	214	558	2e-59	227	gi|1079648355|emb|SCW69529.1|	TIGR02217 family protein [Sphingobium faniae]
Loki_gp17	24.35	193	118	7	18	207	20	187	5e-05	58.5	gi|1079648355|emb|SCW69529.1|	TIGR02217 family protein [Sphingobium faniae]
Loki_gp17	34.07	361	221	6	348	708	211	554	2e-59	227	gi|1079378619|ref|WP_070158268.1|	hypothetical protein [Sphingobium phenoxybenzoativorans]
Loki_gp17	25	196	107	6	18	204	17	181	5e-07	65.1	gi|1079378619|ref|WP_070158268.1|	hypothetical protein [Sphingobium phenoxybenzoativorans]
Loki_gp17	35.73	361	217	7	348	705	271	619	3e-59	231	gi|446397458|ref|WP_000475313.1|;gi|228700336|gb|EEL52901.1|	hypothetical protein [Bacillus cereus]<>hypothetical protein bcere0023_55250 [Bacillus cereus Rock4-2]
Loki_gp17	24.88	213	122	9	12	197	32	233	0.02	50.1	gi|446397458|ref|WP_000475313.1|;gi|228700336|gb|EEL52901.1|	hypothetical protein [Bacillus cereus]<>hypothetical protein bcere0023_55250 [Bacillus cereus Rock4-2]
Loki_gp17	31.97	416	253	8	325	724	191	592	3e-59	226	gi|1055011636|ref|WP_066763553.1|	hypothetical protein [Sphingobium sp. CCH11-B1]
Loki_gp17	25.67	187	109	8	18	200	20	180	2e-06	62.8	gi|1055011636|ref|WP_066763553.1|	hypothetical protein [Sphingobium sp. CCH11-B1]
Loki_gp17	33.03	433	247	9	303	707	331	748	3e-59	227	gi|696576329|ref|WP_033107768.1|;gi|756553038|gb|KIQ71686.1|	hypothetical protein [Acinetobacter baumannii]<>hypothetical protein SE99_03490 [Acinetobacter baumannii]
Loki_gp17	33.42	386	240	7	325	708	188	558	3e-59	226	gi|930032699|ref|WP_054136498.1|;gi|929689368|gb|KPF71924.1|	hypothetical protein [Blastomonas sp. AAP25]<>hypothetical protein IP68_18525 [Blastomonas sp. AAP25]
Loki_gp17	27.89	190	99	6	16	197	15	174	9e-11	77	gi|930032699|ref|WP_054136498.1|;gi|929689368|gb|KPF71924.1|	hypothetical protein [Blastomonas sp. AAP25]<>hypothetical protein IP68_18525 [Blastomonas sp. AAP25]
Loki_gp17	33.7	359	224	6	348	706	213	557	4e-59	226	gi|646534527|ref|WP_025551977.1|	hypothetical protein [Sphingobium barthaii]
Loki_gp17	25.53	188	115	6	18	204	20	183	2e-05	59.7	gi|646534527|ref|WP_025551977.1|	hypothetical protein [Sphingobium barthaii]
Loki_gp17	33.41	416	242	9	325	724	188	584	6e-59	225	gi|758933138|ref|WP_043059817.1|;gi|758504300|gb|KIU29120.1|	hypothetical protein [Sphingomonas taxi]<>hypothetical protein SR41_05655 [Sphingomonas taxi]
Loki_gp17	25.26	190	102	6	17	197	16	174	2e-08	69.7	gi|758933138|ref|WP_043059817.1|;gi|758504300|gb|KIU29120.1|	hypothetical protein [Sphingomonas taxi]<>hypothetical protein SR41_05655 [Sphingomonas taxi]
Loki_gp17	35.1	359	219	6	348	706	213	557	7e-59	225	gi|502804680|ref|WP_013039656.1|;gi|292674551|dbj|BAI96069.1|	hypothetical protein [Sphingobium japonicum]<>conserved hypothetical protein [Sphingobium japonicum UT26S]
Loki_gp17	27.07	181	107	7	18	197	20	176	0.0001	57.4	gi|502804680|ref|WP_013039656.1|;gi|292674551|dbj|BAI96069.1|	hypothetical protein [Sphingobium japonicum]<>conserved hypothetical protein [Sphingobium japonicum UT26S]
Loki_gp17	34.64	384	235	7	325	708	188	555	7e-59	225	gi|1054934089|ref|WP_066690126.1|;gi|1017126089|gb|KZE14683.1|	hypothetical protein [Sphingomonas hankookensis]<>hypothetical protein AVT10_14630 [Sphingomonas hankookensis]
Loki_gp17	26.47	238	123	6	17	246	16	209	5e-10	74.7	gi|1054934089|ref|WP_066690126.1|;gi|1017126089|gb|KZE14683.1|	hypothetical protein [Sphingomonas hankookensis]<>hypothetical protein AVT10_14630 [Sphingomonas hankookensis]
Loki_gp17	34.82	359	220	6	348	706	172	516	7e-59	224	gi|739653254|ref|WP_037508904.1|;gi|666465450|gb|KEY99609.1|	hypothetical protein, partial [Sphingomonas sp. BHC-A]<>hypothetical protein AI27_02390, partial [Sphingomonas sp. BHC-A]
Loki_gp17	34.26	397	242	9	325	717	189	570	8e-59	225	gi|499766034|ref|WP_011446768.1|;gi|87136822|gb|ABD27564.1|;gi|1081515824|emb|SCY71607.1|	hypothetical protein [Novosphingobium aromaticivorans]<>conserved hypothetical protein [Novosphingobium aromaticivorans DSM 12444]<>TIGR02217 family protein [Novosphingobium stygium]
Loki_gp17	28.04	189	108	6	18	203	17	180	1e-11	79.7	gi|499766034|ref|WP_011446768.1|;gi|87136822|gb|ABD27564.1|;gi|1081515824|emb|SCY71607.1|	hypothetical protein [Novosphingobium aromaticivorans]<>conserved hypothetical protein [Novosphingobium aromaticivorans DSM 12444]<>TIGR02217 family protein [Novosphingobium stygium]
Loki_gp17	33.7	359	224	6	348	706	213	557	1e-58	225	gi|873291936|ref|WP_048578075.1|	hypothetical protein [Sphingomonas sp. MEA3-1]
Loki_gp17	26.06	188	114	6	18	204	20	183	1e-05	60.5	gi|873291936|ref|WP_048578075.1|	hypothetical protein [Sphingomonas sp. MEA3-1]
Loki_gp17	33.41	416	242	9	325	724	188	584	1e-58	224	gi|1027754310|ref|WP_063686485.1|;gi|1026262025|gb|ANC86397.1|	hypothetical protein [Sphingomonas sp. NIC1]<>hypothetical protein A7E77_05550 [Sphingomonas sp. NIC1]
Loki_gp17	25.79	190	101	6	17	197	16	174	7e-08	67.8	gi|1027754310|ref|WP_063686485.1|;gi|1026262025|gb|ANC86397.1|	hypothetical protein [Sphingomonas sp. NIC1]<>hypothetical protein A7E77_05550 [Sphingomonas sp. NIC1]
Loki_gp17	35.46	361	218	7	348	705	275	623	1e-58	228	gi|228797009|gb|EEM44321.1|	hypothetical protein bthur0005_59510 [Bacillus thuringiensis serovar pakistani str. T13001]
Loki_gp17	26.44	208	117	9	16	197	40	237	0.009	51.2	gi|228797009|gb|EEM44321.1|	hypothetical protein bthur0005_59510 [Bacillus thuringiensis serovar pakistani str. T13001]
Loki_gp17	35.6	382	227	8	331	710	196	560	2e-58	224	gi|1133688025|ref|WP_076073773.1|;gi|1133385846|gb|APW71841.1|	hypothetical protein [Sphingopyxis granuli]<>hypothetical protein BWD40_02225 [Sphingopyxis granuli]
Loki_gp17	26.2	187	98	6	18	195	17	172	2e-07	66.2	gi|1133688025|ref|WP_076073773.1|;gi|1133385846|gb|APW71841.1|	hypothetical protein [Sphingopyxis granuli]<>hypothetical protein BWD40_02225 [Sphingopyxis granuli]
Loki_gp17	35.46	361	218	7	348	705	271	619	2e-58	228	gi|488109412|ref|WP_002180809.1|;gi|401254719|gb|EJR60945.1|;gi|758671122|gb|KIU74655.1|	MULTISPECIES: hypothetical protein [Bacillus cereus group]<>hypothetical protein IK5_06093 [Bacillus cereus VD154]<>hypothetical protein C797_11961 [Bacillus thuringiensis Sbt003]
Loki_gp17	26.44	208	117	9	16	197	36	233	0.01	50.8	gi|488109412|ref|WP_002180809.1|;gi|401254719|gb|EJR60945.1|;gi|758671122|gb|KIU74655.1|	MULTISPECIES: hypothetical protein [Bacillus cereus group]<>hypothetical protein IK5_06093 [Bacillus cereus VD154]<>hypothetical protein C797_11961 [Bacillus thuringiensis Sbt003]
Loki_gp17	34.82	359	220	6	348	706	213	557	2e-58	224	gi|494958057|ref|WP_007684084.1|;gi|1114387302|gb|APL94464.1|	hypothetical protein [Sphingobium indicum]<>hypothetical protein SIDU_08105 [Sphingobium indicum B90A]
Loki_gp17	25.97	181	109	6	18	197	20	176	7e-05	57.8	gi|494958057|ref|WP_007684084.1|;gi|1114387302|gb|APL94464.1|	hypothetical protein [Sphingobium indicum]<>hypothetical protein SIDU_08105 [Sphingobium indicum B90A]
Loki_gp17	35.38	359	220	6	348	705	381	728	2e-58	226	gi|566045964|gb|ETI65174.1|	hypothetical protein C100_03385 [Sphingobium sp. C100]
Loki_gp17	24.14	232	134	9	18	246	187	379	0.0002	56.6	gi|566045964|gb|ETI65174.1|	hypothetical protein C100_03385 [Sphingobium sp. C100]
Loki_gp17	35.56	374	223	8	335	708	200	555	3e-58	223	gi|947963093|ref|WP_056622916.1|;gi|944728984|gb|KQN80112.1|	hypothetical protein [Sphingomonas sp. Leaf62]<>hypothetical protein ASE91_12850 [Sphingomonas sp. Leaf62]
Loki_gp17	28.43	204	107	7	15	210	14	186	5e-10	74.7	gi|947963093|ref|WP_056622916.1|;gi|944728984|gb|KQN80112.1|	hypothetical protein [Sphingomonas sp. Leaf62]<>hypothetical protein ASE91_12850 [Sphingomonas sp. Leaf62]
Loki_gp17	34.82	359	220	6	348	706	213	557	3e-58	223	gi|523700750|ref|WP_020818956.1|;gi|523382564|gb|EPR16548.1|;gi|530256574|gb|EQA99352.1|	MULTISPECIES: hypothetical protein [Sphingobium]<>hypothetical protein M527_20945 [Sphingobium chinhatense IP26]<>hypothetical protein L286_19805 [Sphingobium sp. HDIP04]
Loki_gp17	25.97	181	109	6	18	197	20	176	8e-05	57.8	gi|523700750|ref|WP_020818956.1|;gi|523382564|gb|EPR16548.1|;gi|530256574|gb|EQA99352.1|	MULTISPECIES: hypothetical protein [Sphingobium]<>hypothetical protein M527_20945 [Sphingobium chinhatense IP26]<>hypothetical protein L286_19805 [Sphingobium sp. HDIP04]
Loki_gp17	34.02	388	239	7	325	710	188	560	3e-58	223	gi|728824440|ref|WP_033925629.1|	hypothetical protein [Sphingomonas sp. 35-24ZXX]
Loki_gp17	27.81	187	107	6	14	197	13	174	8e-10	73.9	gi|728824440|ref|WP_033925629.1|	hypothetical protein [Sphingomonas sp. 35-24ZXX]
Loki_gp17	35.28	360	221	6	348	706	214	562	4e-58	223	gi|665942656|ref|WP_031308702.1|	hypothetical protein [Sphingobium sp. C100]
Loki_gp17	24.14	232	134	9	18	246	20	212	0.0001	57	gi|665942656|ref|WP_031308702.1|	hypothetical protein [Sphingobium sp. C100]
Loki_gp17	32.9	386	242	7	325	708	188	558	5e-58	223	gi|1059970779|ref|WP_069051337.1|;gi|1059508369|gb|AOG01238.1|	hypothetical protein [Blastomonas sp. RAC04]<>hypothetical protein BSY18_3352 [Blastomonas sp. RAC04]
Loki_gp17	27.14	199	107	6	16	206	15	183	2e-10	75.9	gi|1059970779|ref|WP_069051337.1|;gi|1059508369|gb|AOG01238.1|	hypothetical protein [Blastomonas sp. RAC04]<>hypothetical protein BSY18_3352 [Blastomonas sp. RAC04]
Loki_gp17	33.67	395	239	7	331	707	252	641	7e-58	221	gi|498012344|ref|WP_010326500.1|	MULTISPECIES: hypothetical protein [Acinetobacter]
Loki_gp17	34.54	359	221	6	348	706	214	558	1e-57	222	gi|1054755881|ref|WP_066520149.1|;gi|1073519679|dbj|BAV66234.1|	hypothetical protein [Sphingobium cloacae]<>hypothetical protein SCLO_1031940 [Sphingobium cloacae]
Loki_gp17	25.13	191	113	8	18	204	20	184	6e-05	58.2	gi|1054755881|ref|WP_066520149.1|;gi|1073519679|dbj|BAV66234.1|	hypothetical protein [Sphingobium cloacae]<>hypothetical protein SCLO_1031940 [Sphingobium cloacae]
Loki_gp17	35.45	378	225	8	331	706	196	556	1e-57	222	gi|1055450448|ref|WP_067111091.1|	hypothetical protein [Sphingopyxis granuli]
Loki_gp17	26.2	187	98	6	18	195	17	172	6e-08	67.8	gi|1055450448|ref|WP_067111091.1|	hypothetical protein [Sphingopyxis granuli]
Loki_gp17	34.82	382	230	8	331	710	196	560	1e-57	222	gi|1055522541|ref|WP_067180961.1|;gi|991910061|gb|AMG73271.1|	hypothetical protein [Sphingopyxis granuli]<>Uncharacterized protein SGRAN_0877 [Sphingopyxis granuli]
Loki_gp17	26.2	187	98	6	18	195	17	172	2e-07	65.9	gi|1055522541|ref|WP_067180961.1|;gi|991910061|gb|AMG73271.1|	hypothetical protein [Sphingopyxis granuli]<>Uncharacterized protein SGRAN_0877 [Sphingopyxis granuli]
Loki_gp17	33.49	421	253	9	303	703	331	744	1e-57	221	gi|736665754|ref|WP_034672638.1|;gi|587894489|gb|EXB83011.1|	hypothetical protein, partial [Acinetobacter sp. 272263]<>hypothetical protein J538_2282, partial [Acinetobacter sp. 272263]
Loki_gp17	33.73	415	249	9	325	736	188	579	2e-57	221	gi|935540179|ref|WP_054442190.1|;gi|930196162|gb|KPH57573.1|	hypothetical protein [Novosphingobium sp. ST904]<>hypothetical protein ADT71_29025 [Novosphingobium sp. ST904]
Loki_gp17	27.44	215	121	6	18	226	17	202	7e-13	84	gi|935540179|ref|WP_054442190.1|;gi|930196162|gb|KPH57573.1|	hypothetical protein [Novosphingobium sp. ST904]<>hypothetical protein ADT71_29025 [Novosphingobium sp. ST904]
Loki_gp17	34.29	385	232	7	325	707	188	553	2e-57	221	gi|516605040|ref|WP_017980063.1|;gi|1016109273|gb|KZB96000.1|;gi|1078696149|gb|AOW22327.1|	hypothetical protein [Sphingomonas melonis]<>hypothetical protein AVM11_15115 [Sphingomonas melonis TY]<>hypothetical protein BJP26_01110 [Sphingomonas melonis TY]
Loki_gp17	25.26	190	102	6	17	197	16	174	3e-08	68.9	gi|516605040|ref|WP_017980063.1|;gi|1016109273|gb|KZB96000.1|;gi|1078696149|gb|AOW22327.1|	hypothetical protein [Sphingomonas melonis]<>hypothetical protein AVM11_15115 [Sphingomonas melonis TY]<>hypothetical protein BJP26_01110 [Sphingomonas melonis TY]
Loki_gp17	34.2	383	235	7	325	705	189	556	2e-57	221	gi|948110967|ref|WP_056769483.1|;gi|944568057|gb|KQM20253.1|	hypothetical protein [Novosphingobium sp. Leaf2]<>hypothetical protein ASE49_17205 [Novosphingobium sp. Leaf2]
Loki_gp17	27.27	198	105	6	14	203	13	179	2e-09	73.2	gi|948110967|ref|WP_056769483.1|;gi|944568057|gb|KQM20253.1|	hypothetical protein [Novosphingobium sp. Leaf2]<>hypothetical protein ASE49_17205 [Novosphingobium sp. Leaf2]
Loki_gp17	34.31	376	230	6	335	710	200	558	2e-57	221	gi|1054784872|ref|WP_066548310.1|	MULTISPECIES: hypothetical protein [Sphingomonas]
Loki_gp17	26.83	205	109	7	15	210	14	186	6e-09	70.9	gi|1054784872|ref|WP_066548310.1|	MULTISPECIES: hypothetical protein [Sphingomonas]
Loki_gp17	33.68	383	237	7	325	705	189	556	2e-57	221	gi|746021200|ref|WP_039096988.1|;gi|733430325|gb|KHL24539.1|	hypothetical protein [Porphyrobacter mercurialis]<>hypothetical protein PK98_11125 [Porphyrobacter mercurialis]
Loki_gp17	25.49	204	120	8	18	215	17	194	5e-09	71.6	gi|746021200|ref|WP_039096988.1|;gi|733430325|gb|KHL24539.1|	hypothetical protein [Porphyrobacter mercurialis]<>hypothetical protein PK98_11125 [Porphyrobacter mercurialis]
Loki_gp17	34.63	387	229	9	327	705	189	559	3e-57	221	gi|1056193387|ref|WP_067685028.1|;gi|1024547910|gb|KZY54372.1|	hypothetical protein [Erythrobacter sp. HI0063]<>hypothetical protein A3736_14415 [Erythrobacter sp. HI0063]
Loki_gp17	29.69	192	89	6	17	197	16	172	7e-13	84	gi|1056193387|ref|WP_067685028.1|;gi|1024547910|gb|KZY54372.1|	hypothetical protein [Erythrobacter sp. HI0063]<>hypothetical protein A3736_14415 [Erythrobacter sp. HI0063]
Loki_gp17	34.73	383	237	7	325	705	187	558	3e-57	221	gi|974215027|gb|KUO56352.1|	hypothetical protein APF82_10420 [Sphingomonadales bacterium BRH_c42]
Loki_gp17	27.4	208	101	6	15	209	14	184	3e-11	79	gi|974215027|gb|KUO56352.1|	hypothetical protein APF82_10420 [Sphingomonadales bacterium BRH_c42]
Loki_gp17	33.85	384	237	8	325	706	186	554	5e-57	220	gi|1113190177|gb|OJU60584.1|	hypothetical protein BGO08_10365 [Altererythrobacter sp. 66-12]
Loki_gp17	26.29	194	116	6	18	210	17	184	2e-08	69.3	gi|1113190177|gb|OJU60584.1|	hypothetical protein BGO08_10365 [Altererythrobacter sp. 66-12]
Loki_gp17	34.19	389	228	12	325	705	187	555	7e-57	220	gi|936189055|ref|WP_054523253.1|;gi|934278764|gb|KPM24218.1|;gi|934282023|gb|KPM27461.1|;gi|1030121245|gb|OAM11055.1|	MULTISPECIES: hypothetical protein [Citromicrobium]<>hypothetical protein AAJ72_00030 [Citromicrobium sp. RCC1885]<>hypothetical protein AAJ74_00775 [Citromicrobium sp. RCC1878]<>hypothetical protein A0U43_08630 [Citromicrobium sp. RCC1897]
Loki_gp17	27.42	186	99	4	18	197	17	172	9e-13	83.6	gi|936189055|ref|WP_054523253.1|;gi|934278764|gb|KPM24218.1|;gi|934282023|gb|KPM27461.1|;gi|1030121245|gb|OAM11055.1|	MULTISPECIES: hypothetical protein [Citromicrobium]<>hypothetical protein AAJ72_00030 [Citromicrobium sp. RCC1885]<>hypothetical protein AAJ74_00775 [Citromicrobium sp. RCC1878]<>hypothetical protein A0U43_08630 [Citromicrobium sp. RCC1897]
Loki_gp17	33.94	383	235	8	325	705	190	556	7e-57	220	gi|545453004|ref|WP_021690002.1|;gi|540738027|dbj|GAD49095.1|	hypothetical protein [Novosphingobium tardaugens]<>hypothetical protein NT2_05_00160 [Novosphingobium tardaugens NBRC 16725]
Loki_gp17	28.04	189	97	5	18	197	17	175	4e-10	75.1	gi|545453004|ref|WP_021690002.1|;gi|540738027|dbj|GAD49095.1|	hypothetical protein [Novosphingobium tardaugens]<>hypothetical protein NT2_05_00160 [Novosphingobium tardaugens NBRC 16725]
Loki_gp17	36.21	359	215	6	348	706	226	570	7e-57	220	gi|490318302|ref|WP_004207798.1|;gi|425713438|gb|EKU76451.1|;gi|1110320816|emb|SHL78437.1|	MULTISPECIES: hypothetical protein [Sphingobium]<>TIGR02217 family protein [Sphingobium yanoikuyae ATCC 51230]<>TIGR02217 family protein [Sphingobium sp. YR657]
Loki_gp17	25.63	199	110	9	18	204	24	196	8e-05	57.8	gi|490318302|ref|WP_004207798.1|;gi|425713438|gb|EKU76451.1|;gi|1110320816|emb|SHL78437.1|	MULTISPECIES: hypothetical protein [Sphingobium]<>TIGR02217 family protein [Sphingobium yanoikuyae ATCC 51230]<>TIGR02217 family protein [Sphingobium sp. YR657]
Loki_gp17	36.03	358	215	6	348	705	222	565	7e-57	220	gi|1028238674|ref|WP_063976694.1|;gi|1027987238|gb|OAH42366.1|	hypothetical protein [Sphingobium yanoikuyae]<>hypothetical protein AX777_14455 [Sphingobium yanoikuyae]
Loki_gp17	25.5	200	111	9	18	205	20	193	6e-05	58.2	gi|1028238674|ref|WP_063976694.1|;gi|1027987238|gb|OAH42366.1|	hypothetical protein [Sphingobium yanoikuyae]<>hypothetical protein AX777_14455 [Sphingobium yanoikuyae]
Loki_gp17	36.03	358	215	6	348	705	222	565	8e-57	219	gi|516071386|ref|WP_017501969.1|	hypothetical protein [alpha proteobacterium LLX12A]
Loki_gp17	25.5	200	111	9	18	205	20	193	6e-05	58.2	gi|516071386|ref|WP_017501969.1|	hypothetical protein [alpha proteobacterium LLX12A]
Loki_gp18	100	178	0	0	1	178	1	178	1e-128	367	gi|949419309|emb|CUS06479.1|	hypothetical protein [unclassified Siphoviridae]
Loki_gp18	82.02	178	32	0	1	178	1	178	4e-107	312	gi|589892164|ref|YP_009008529.1|;gi|583926718|gb|AHI60024.1|	hypothetical protein IME_AB3_25 [Acinetobacter phage IME_AB3]<>hypothetical protein IME_AB3_25 [Acinetobacter phage IME_AB3]
Loki_gp18	31.61	174	117	2	6	177	12	185	6e-26	107	gi|494601600|ref|WP_007359853.1|;gi|391218459|gb|EIP96879.1|	hypothetical protein [Opitutaceae bacterium TAV1]<>hypothetical protein OpiT1DRAFT_01306 [Opitutaceae bacterium TAV1]
Loki_gp18	30.06	163	113	1	15	177	21	182	4e-25	104	gi|1094081490|ref|WP_071072838.1|;gi|1092252026|gb|AOZ10357.1|	hypothetical protein [Cupriavidus sp. USMAA1020]<>hypothetical protein BKK80_32745 [Cupriavidus sp. USMAA1020]
Loki_gp18	29.34	167	109	3	15	177	21	182	4e-24	102	gi|1094022228|ref|WP_071018166.1|;gi|1092243930|gb|AOZ02264.1|	hypothetical protein [Cupriavidus sp. USMAHM13]<>hypothetical protein BKK81_23565 [Cupriavidus sp. USMAHM13]
Loki_gp18	28.57	168	120	0	10	177	15	182	5e-24	102	gi|306853717|gb|EFM85934.1|	hypothetical protein appser1_5810 [Actinobacillus pleuropneumoniae serovar 1 str. 4074]
Loki_gp18	32.32	164	109	2	16	177	22	185	4e-23	99.8	gi|759900221|ref|WP_043586664.1|	hypothetical protein [Diplosphaera colitermitum]
Loki_gp18	28.98	176	123	2	3	177	9	183	2e-22	97.8	gi|496231326|ref|WP_008945361.1|;gi|407202491|gb|EKE72482.1|	hypothetical protein [Oceanibaculum indicum]<>hypothetical protein P24_13783 [Oceanibaculum indicum P24]
Loki_gp18	29.11	158	112	0	20	177	1	158	7e-22	95.5	gi|491805442|ref|WP_005609921.1|;gi|306862630|gb|EFM94586.1|;gi|306867140|gb|EFM98996.1|	hypothetical protein [Actinobacillus pleuropneumoniae]<>hypothetical protein appser9_5790 [Actinobacillus pleuropneumoniae serovar 9 str. CVJ13261]<>hypothetical protein appser11_5870 [Actinobacillus pleuropneumoniae serovar 11 str. 56153]
Loki_gp18	27.61	163	117	1	15	177	21	182	3e-21	94.7	gi|1094078573|ref|WP_071069921.1|;gi|1092248431|gb|AOZ06763.1|	hypothetical protein [Cupriavidus sp. USMAA1020]<>hypothetical protein BKK80_13750 [Cupriavidus sp. USMAA1020]
Loki_gp18	29.07	172	121	1	6	177	12	182	1e-20	92.8	gi|1011002123|ref|WP_061960238.1|	hypothetical protein [Cupriavidus pauculus]
Loki_gp18	27.33	172	125	0	6	177	12	183	2e-20	92.4	gi|495333836|ref|WP_008058573.1|;gi|333445428|gb|EGK73370.1|	hypothetical protein [Methyloversatilis universalis]<>hypothetical protein METUNv1_00548 [Methyloversatilis universalis FAM5]
Loki_gp18	31.25	176	114	3	6	177	12	184	9e-19	88.2	gi|1094611780|emb|SEO90276.1|	hypothetical protein SAMN04490248_11595 [Salinihabitans flavidus]
Loki_gp18	29.94	177	117	3	5	177	11	184	1e-18	87.8	gi|505309695|ref|WP_015496797.1|;gi|476515801|gb|AGI73810.1|	hypothetical protein [Octadecabacter arcticus]<>hypothetical protein OA238_c38650 [Octadecabacter arcticus 238]
Loki_gp18	27.54	167	120	1	12	177	18	184	2e-18	87	gi|521962642|ref|WP_020474247.1|	hypothetical protein [Zavarzinella formosa]
Loki_gp18	26.7	176	128	1	4	178	12	187	3e-18	87	gi|497719131|ref|WP_010033315.1|	hypothetical protein [Gemmata obscuriglobus]
Loki_gp18	30.11	176	116	3	6	177	12	184	1e-17	85.1	gi|1094611298|emb|SEP02960.1|	hypothetical protein SAMN04490248_12040 [Salinihabitans flavidus]
Loki_gp18	29.38	177	118	3	5	177	11	184	2e-17	85.1	gi|497497061|ref|WP_009811259.1|;gi|85827088|gb|EAQ47284.1|	hypothetical protein [Roseobacter sp. MED193]<>hypothetical protein MED193_18864 [Roseobacter sp. MED193]
Loki_gp18	25	168	125	1	10	177	4	170	3e-17	84	gi|1006071955|gb|AMQ45049.1|	hypothetical protein AMS64_12020 [Aeromonas veronii]
Loki_gp18	25	168	125	1	10	177	8	174	3e-17	84.3	gi|1061672556|ref|WP_069203131.1|	hypothetical protein [Aeromonas veronii]
Loki_gp18	30.9	178	118	4	1	177	729	902	9e-17	87	gi|589892165|ref|YP_009008530.1|;gi|583926719|gb|AHI60025.1|	putative capsid and scaffold protein [Acinetobacter phage IME_AB3]<>putative capsid and scaffold protein [Acinetobacter phage IME_AB3]
Loki_gp18	29.94	177	117	3	5	177	11	184	9e-17	83.2	gi|1097640792|emb|SFK78263.1|	hypothetical protein SAMN04488036_102162 [Shimia haliotis]
Loki_gp18	27.33	172	124	1	6	176	8	179	4e-16	81.3	gi|494679276|ref|WP_007436611.1|;gi|363717801|gb|EHM01163.1|	hypothetical protein [Acetobacteraceae bacterium AT-5844]<>hypothetical protein HMPREF9946_02238 [Acetobacteraceae bacterium AT-5844]
Loki_gp18	25.57	176	126	2	6	177	8	182	1e-15	80.5	gi|721524650|gb|KGY68052.1|	hypothetical protein MC65_12635 [Aeromonas caviae]
Loki_gp18	25.99	177	128	3	4	177	9	185	7e-15	78.2	gi|501560845|ref|WP_012565327.1|;gi|209956900|gb|ACI97536.1|	hypothetical protein [Rhodospirillum centenum]<>conserved hypothetical protein [Rhodospirillum centenum SW]
Loki_gp18	25.71	175	129	1	4	177	11	185	8e-15	78.2	gi|522209746|ref|WP_020717185.1|	hypothetical protein [Acidobacteriaceae bacterium KBS 96]
Loki_gp18	27.53	178	120	4	5	177	11	184	1e-14	77.4	gi|959687719|ref|WP_058124238.1|;gi|950305066|emb|CUH61551.1|;gi|1109950324|emb|SHJ07409.1|	hypothetical protein [Thalassobacter stenotrophicus]<>hypothetical protein THS5294_02862 [Thalassobacter stenotrophicus]<>hypothetical protein SAMN02744035_02498 [Thalassobacter stenotrophicus DSM 16310]
Loki_gp18	29.24	171	114	3	14	177	20	190	2e-14	77.8	gi|499843224|ref|WP_011523958.1|;gi|94552235|gb|ABF42159.1|	hypothetical protein [Candidatus Koribacter versatilis]<>hypothetical protein Acid345_3158 [Candidatus Koribacter versatilis Ellin345]
Loki_gp18	25.73	171	126	1	5	174	16	186	2e-14	77.4	gi|517845689|ref|WP_019015897.1|	hypothetical protein [Elioraea tepidiphila]
Loki_gp18	29.52	166	115	2	12	176	18	182	2e-14	77.4	gi|930029528|ref|WP_054133327.1|;gi|929694287|gb|KPF76722.1|	hypothetical protein [Blastomonas sp. AAP25]<>hypothetical protein IP68_02160 [Blastomonas sp. AAP25]
Loki_gp18	29.78	178	120	4	1	177	726	899	2e-14	80.5	gi|949419308|emb|CUS06478.1|	hypothetical protein [unclassified Siphoviridae]
Loki_gp18	26.19	168	123	1	8	174	19	186	2e-14	77	gi|494063685|ref|WP_007005763.1|;gi|296267790|gb|EFH13611.1|	hypothetical protein [Roseomonas cervicalis]<>hypothetical protein HMPREF0731_0148 [Roseomonas cervicalis ATCC 49957]
Loki_gp18	27.53	178	120	4	5	177	11	184	4e-14	76.3	gi|873893252|ref|WP_048599770.1|;gi|857844383|emb|CRK76357.1|;gi|950304987|emb|CUH61472.1|;gi|1097160094|emb|SFJ79190.1|;gi|1109950402|emb|SHJ09015.1|	MULTISPECIES: hypothetical protein [Rhodobacteraceae]<>hypothetical protein NIG5292_02417 [Nereida ignava]<>hypothetical protein THS5294_02780 [Thalassobacter stenotrophicus]<>hypothetical protein SAMN02745667_02381 [Nereida ignava DSM 16309]<>hypothetical protein SAMN02744035_02579 [Thalassobacter stenotrophicus DSM 16310]
Loki_gp18	26.54	162	118	1	14	174	25	186	4e-14	76.3	gi|653034106|ref|WP_027285840.1|	hypothetical protein [Rubritepida flocculans]
Loki_gp18	23.78	164	122	3	15	177	22	183	4e-14	76.6	gi|495759475|ref|WP_008484054.1|;gi|407205206|gb|EKE75182.1|	hypothetical protein [Gallaecimonas xiamenensis]<>hypothetical protein B3C1_07896 [Gallaecimonas xiamenensis 3-C-1]
Loki_gp18	27.78	162	116	1	14	174	22	183	6e-14	75.9	gi|1132131787|ref|WP_075823479.1|;gi|1125771912|dbj|GAV36622.1|	hypothetical protein [Roseomonas sp. TAS13]<>hypothetical protein ROTAS13_04310 [Roseomonas sp. TAS13]
Loki_gp18	27.78	162	116	1	15	175	26	187	6e-14	75.9	gi|1087116302|emb|SDD04985.1|	hypothetical protein SAMN04487779_100442 [Belnapia rosea]
Loki_gp18	27.53	178	120	4	5	177	11	184	6e-14	75.5	gi|960348670|ref|WP_058243538.1|;gi|950322400|emb|CUH70034.1|;gi|950333627|emb|CUH72336.1|	hypothetical protein [Thalassobius mediterraneus]<>hypothetical protein TL5118_04009 [Thalassobius mediterraneus]<>hypothetical protein TL5120_02132 [Thalassobius mediterraneus]
Loki_gp18	26.97	178	121	4	5	177	11	184	7e-14	75.5	gi|1088834684|emb|SDY30096.1|	hypothetical protein SAMN05444486_1011223 [Lentibacter algarum]
Loki_gp18	26.4	178	122	4	5	177	11	184	7e-14	75.5	gi|740165762|ref|WP_038009049.1|;gi|695954149|gb|KGK99888.1|	hypothetical protein [Thalassobacter sp. 16PALIMAR09]<>hypothetical protein PM04_17275 [Thalassobacter sp. 16PALIMAR09]
Loki_gp18	27.38	168	115	3	14	177	20	184	9e-14	75.1	gi|959686734|ref|WP_058123253.1|;gi|950306200|emb|CUH60230.1|;gi|1109951404|emb|SHI70766.1|	hypothetical protein [Thalassobacter stenotrophicus]<>hypothetical protein THS5294_01519 [Thalassobacter stenotrophicus]<>hypothetical protein SAMN02744035_01311 [Thalassobacter stenotrophicus DSM 16310]
Loki_gp18	27.16	162	117	1	14	174	22	183	2e-13	74.7	gi|1087122917|emb|SDB48398.1|;gi|1099594637|emb|SFL13985.1|	hypothetical protein SAMN02927895_01833 [Belnapia rosea]<>hypothetical protein SAMN02745775_12517 [Roseomonas stagni DSM 19981]
Loki_gp18	27.16	162	117	1	14	174	22	183	2e-13	74.3	gi|1099594605|emb|SFL14583.1|	hypothetical protein SAMN02745775_12616 [Roseomonas stagni DSM 19981]
Loki_gp18	26.97	178	121	4	5	177	11	184	2e-13	74.3	gi|740166628|ref|WP_038009781.1|;gi|695754213|gb|KGK78280.1|	hypothetical protein [Thalassobacter stenotrophicus]<>hypothetical protein PM03_15120 [Thalassobacter stenotrophicus]
Loki_gp18	25	168	125	1	8	174	19	186	2e-13	74.3	gi|653034133|ref|WP_027285866.1|	hypothetical protein [Rubritepida flocculans]
Loki_gp18	26.4	178	122	4	5	177	11	184	6e-13	72.8	gi|740165706|ref|WP_038009003.1|;gi|695954180|gb|KGK99913.1|	hypothetical protein [Thalassobacter sp. 16PALIMAR09]<>hypothetical protein PM04_17125 [Thalassobacter sp. 16PALIMAR09]
Loki_gp18	26.79	168	119	3	11	174	16	183	7e-13	73.2	gi|1081448955|emb|SCY74799.1|	hypothetical protein SAMN05216420_11632 [Nitrosospira sp. Nl5]
Loki_gp18	25.14	175	126	2	8	177	14	188	7e-13	73.6	gi|775449520|dbj|BAQ84222.1|	phage minor tail protein L [uncultured Mediterranean phage uvMED]
Loki_gp18	26.54	162	118	1	15	175	27	188	8e-13	72.8	gi|653030181|ref|WP_027281980.1|	hypothetical protein [Roseomonas gilardii]
Loki_gp18	26.14	176	129	1	3	177	9	184	1e-12	72.4	gi|521958126|ref|WP_020469731.1|	hypothetical protein [Zavarzinella formosa]
Loki_gp18	26.97	178	121	4	5	177	11	184	2e-12	72	gi|740165301|ref|WP_038008666.1|;gi|695954325|gb|KGL00038.1|	hypothetical protein [Thalassobacter sp. 16PALIMAR09]<>hypothetical protein PM04_16160 [Thalassobacter sp. 16PALIMAR09]
Loki_gp18	24.71	174	130	1	5	177	11	184	3e-12	71.2	gi|740165741|ref|WP_038009031.1|;gi|695954162|gb|KGK99898.1|	hypothetical protein [Thalassobacter sp. 16PALIMAR09]<>hypothetical protein PM04_17190 [Thalassobacter sp. 16PALIMAR09]
Loki_gp18	26.25	160	117	1	16	174	32	191	4e-12	71.2	gi|739441946|ref|WP_037301929.1|	hypothetical protein [Rubritepida flocculans]
Loki_gp18	30.34	145	98	2	36	177	47	191	9e-12	70.1	gi|495889671|ref|WP_008614250.1|;gi|452966373|gb|EME71384.1|	hypothetical protein [Magnetospirillum caucaseum]<>hypothetical protein H261_03208 [Magnetospirillum caucaseum]
Loki_gp18	27.43	175	124	3	5	176	10	184	2e-11	69.3	gi|1124460441|ref|WP_074746295.1|;gi|1094431218|emb|SEN70717.1|	hypothetical protein [Nitrosospira multiformis]<>hypothetical protein SAMN05216404_106146 [Nitrosospira multiformis]
Loki_gp18	25.6	168	124	1	10	176	14	181	2e-11	68.9	gi|817137632|ref|WP_046509881.1|;gi|816198349|gb|KKJ75449.1|	hypothetical protein [Kiloniella litopenaei]<>hypothetical protein WH95_18590 [Kiloniella litopenaei]
Loki_gp18	23.21	168	128	1	12	178	21	188	4e-11	68.2	gi|521959853|ref|WP_020471458.1|	hypothetical protein [Zavarzinella formosa]
Loki_gp18	25.44	169	125	1	10	177	4	172	4e-11	68.2	gi|1027663307|ref|WP_063607974.1|	hypothetical protein [Zavarzinella formosa]
Loki_gp18	25.84	178	125	2	4	177	10	184	9e-11	67.4	gi|1016501513|ref|WP_063088187.1|;gi|1016454224|gb|KZC99685.1|	hypothetical protein [Thalassospira sp. MCCC 1A02898]<>hypothetical protein AUQ41_08380 [Thalassospira sp. MCCC 1A02898]
Loki_gp18	25.44	169	125	1	10	177	4	172	1e-10	67	gi|1027663280|ref|WP_063607947.1|	hypothetical protein [Zavarzinella formosa]
Loki_gp18	23.75	160	121	1	16	174	24	183	1e-10	67	gi|653034170|ref|WP_027285901.1|	hypothetical protein [Rubritepida flocculans]
Loki_gp18	25.29	174	126	3	5	174	10	183	2e-10	66.6	gi|1113552345|gb|OJY12442.1|	hypothetical protein BGO99_13790 [Nitrosospira sp. 56-18]
Loki_gp18	21.84	174	135	1	4	177	13	185	5e-10	65.5	gi|752539705|ref|WP_041211173.1|;gi|662019443|gb|KEP92171.1|	hypothetical protein [Aeromonas caviae]<>hypothetical protein DA11_02625 [Aeromonas caviae]
Loki_gp18	24.19	186	129	4	3	176	8	193	2e-09	63.9	gi|738532601|ref|WP_036481014.1|;gi|667917551|gb|KFB10328.1|	hypothetical protein [Nitratireductor basaltis]<>hypothetical protein EL18_01359 [Nitratireductor basaltis]
Loki_gp18	25.15	163	120	2	16	177	11	172	3e-09	62.8	gi|1131029279|ref|WP_075788853.1|;gi|1130015830|gb|OLS51871.1|	hypothetical protein [Rhodovulum sulfidophilum]<>hypothetical protein BV392_07530 [Rhodovulum sulfidophilum]
Loki_gp18	24.02	179	124	3	3	169	9	187	3e-09	63.5	gi|636773984|ref|WP_024310807.1|	hypothetical protein [Sinorhizobium medicae]
Loki_gp18	23.46	179	125	3	3	169	9	187	6e-09	62.8	gi|516641101|ref|WP_018012680.1|	hypothetical protein [Sinorhizobium medicae]
Loki_gp18	22.73	176	132	2	6	177	11	186	7e-09	62.8	gi|177842460|gb|ACB76712.1|	conserved hypothetical protein [Opitutus terrae PB90-1]
Loki_gp18	26.9	145	103	2	35	176	40	184	1e-08	62	gi|1094001499|ref|WP_070998812.1|	hypothetical protein [Methylobacterium sp. C1]
Loki_gp18	23.93	163	122	2	16	177	4	165	1e-08	61.2	gi|755111914|ref|WP_042462609.1|;gi|1023371101|gb|ANB39022.1|	hypothetical protein [Rhodovulum sulfidophilum]<>hypothetical protein A6024_14510 [Rhodovulum sulfidophilum]
Loki_gp18	23.46	179	125	3	3	169	9	187	1e-08	61.6	gi|504342199|ref|WP_014529301.1|;gi|336032442|gb|AEH78374.1|	hypothetical protein [Sinorhizobium meliloti]<>hypothetical protein SM11_chr1097 [Sinorhizobium meliloti SM11]
Loki_gp18	23.46	179	125	3	3	169	9	187	1e-08	61.6	gi|515836136|ref|WP_017266889.1|	hypothetical protein [Sinorhizobium meliloti]
Loki_gp18	23.93	163	122	2	16	177	11	172	1e-08	61.2	gi|1024293491|ref|WP_063491320.1|;gi|1023366640|gb|ANB35200.1|	hypothetical protein [Rhodovulum sulfidophilum]<>hypothetical protein A6W98_14645 [Rhodovulum sulfidophilum DSM 1374]
Loki_gp18	27.65	170	118	5	11	176	16	184	1e-08	61.6	gi|1081451519|emb|SCX94354.1|	hypothetical protein SAMN05216420_101404 [Nitrosospira sp. Nl5]
Loki_gp18	23.31	163	123	2	16	177	11	172	2e-08	60.8	gi|1131028314|ref|WP_075787888.1|;gi|1130014525|gb|OLS50566.1|	hypothetical protein [Rhodovulum sulfidophilum]<>hypothetical protein BV392_00155 [Rhodovulum sulfidophilum]
Loki_gp18	27.12	177	122	5	5	176	9	183	3e-08	60.5	gi|497208067|ref|WP_009522329.1|;gi|392716008|gb|EIZ03588.1|	hypothetical protein [Ralstonia sp. PBA]<>hypothetical protein MW7_1623 [Ralstonia sp. PBA]
Loki_gp18	23.31	163	123	2	16	177	11	172	4e-08	60.1	gi|1131023499|ref|WP_075783087.1|;gi|1130013825|gb|OLS49867.1|	hypothetical protein [Rhodovulum sulfidophilum]<>hypothetical protein BV379_17360 [Rhodovulum sulfidophilum]
Loki_gp18	26.86	175	127	1	4	177	10	184	4e-08	60.1	gi|1098560049|ref|WP_071240117.1|;gi|1095598258|gb|OHZ00973.1|	hypothetical protein [Thalassospira sp. MIT1004]<>hypothetical protein BC440_09030 [Thalassospira sp. MIT1004]
Loki_gp18	22.7	163	122	2	19	177	3	165	4e-08	60.5	gi|918007830|ref|WP_052300416.1|	hypothetical protein [Opitutus terrae]
Loki_gp18	23.31	163	123	2	16	177	4	165	4e-08	59.7	gi|770474950|dbj|BAQ67830.1|;gi|770476565|dbj|BAQ69445.1|	hypothetical protein NHU_00661 [Rhodovulum sulfidophilum]<>hypothetical protein NHU_02293 [Rhodovulum sulfidophilum]
Loki_gp18	23.31	163	123	2	16	177	11	172	6e-08	59.7	gi|985594320|ref|WP_060833821.1|;gi|770476295|dbj|BAQ69175.1|	hypothetical protein [Rhodovulum sulfidophilum]<>hypothetical protein NHU_02020 [Rhodovulum sulfidophilum]
Loki_gp18	23.31	163	123	2	16	177	11	172	6e-08	59.3	gi|755111009|ref|WP_042461708.1|;gi|1023366123|gb|ANB34683.1|;gi|1023370584|gb|ANB38505.1|	hypothetical protein [Rhodovulum sulfidophilum]<>hypothetical protein A6W98_11795 [Rhodovulum sulfidophilum DSM 1374]<>hypothetical protein A6024_11660 [Rhodovulum sulfidophilum]
Loki_gp18	22.91	179	126	3	3	169	9	187	6e-08	59.7	gi|503610609|ref|WP_013844685.1|;gi|334096008|gb|AEG54019.1|;gi|1095180229|emb|SEI68363.1|	hypothetical protein [Sinorhizobium meliloti]<>hypothetical protein Sinme_2300 [Sinorhizobium meliloti AK83]<>hypothetical protein SAMN04244575_01535 [Sinorhizobium meliloti]
Loki_gp18	23.3	176	126	4	7	177	12	183	2e-07	58.2	gi|1124361971|ref|WP_074652042.1|;gi|1089033914|emb|SEB40591.1|	hypothetical protein [Terriglobus roseus]<>Uncharacterized conserved protein [Terriglobus roseus]
Loki_gp18	26.37	182	123	5	3	176	7	185	3e-07	58.2	gi|948148132|ref|WP_056806430.1|;gi|946349134|gb|KRE00086.1|	hypothetical protein [Bosea sp. Root381]<>hypothetical protein ASE63_08260 [Bosea sp. Root381]
Loki_gp18	22.7	163	124	2	16	177	11	172	5e-07	57	gi|1131029226|ref|WP_075788800.1|;gi|1130015765|gb|OLS51806.1|	hypothetical protein [Rhodovulum sulfidophilum]<>hypothetical protein BV392_07175 [Rhodovulum sulfidophilum]
Loki_gp18	26.03	146	104	2	35	176	40	185	7e-07	57	gi|914803809|ref|WP_050734096.1|;gi|913253589|gb|KNY21598.1|	hypothetical protein [Methylobacterium sp. ARG-1]<>hypothetical protein AKJ13_15200 [Methylobacterium sp. ARG-1]
Loki_gp18	25.29	170	122	5	11	176	540	708	8e-07	58.2	gi|1081468752|emb|SCX40475.1|	Right handed beta helix region [Nitrosospira sp. Nsp1]
Loki_gp18	43.14	51	29	0	127	177	134	184	1e-05	53.5	gi|1016512087|ref|WP_063093022.1|;gi|1016451674|gb|KZC97164.1|;gi|1016464971|gb|KZD10243.1|	hypothetical protein [Thalassospira xiamenensis]<>hypothetical protein AUP40_04300 [Thalassospira xiamenensis]<>hypothetical protein AUP45_02910 [Thalassospira xiamenensis]
Loki_gp18	29.03	93	65	1	87	178	93	185	8e-05	51.2	gi|787064190|dbj|BAR35096.1|	Phage minor tail protein L [uncultured Mediterranean phage uvMED]
Loki_gp18	26.75	157	98	4	37	176	43	199	9e-05	51.2	gi|497924255|ref|WP_010238411.1|	MULTISPECIES: hypothetical protein [Citromicrobium]
Loki_gp18	23.73	177	134	1	2	177	8	184	9e-05	50.8	gi|910255209|ref|WP_050059710.1|	hypothetical protein [Silvibacterium bohemicum]
Loki_gp18	26.62	154	98	5	37	176	34	186	0.0002	50.1	gi|938950109|ref|WP_054729572.1|;gi|1015409236|gb|AMU90538.1|	hypothetical protein [Sphingopyxis macrogoltabida]<>hypothetical protein ATM17_16060 [Sphingopyxis macrogoltabida]
Loki_gp18	26.62	154	98	5	37	176	43	195	0.0002	50.1	gi|938157912|gb|ALJ14273.1|	hypothetical protein LH19_15490 [Sphingopyxis macrogoltabida]
Loki_gp18	22.16	185	127	6	4	177	9	187	0.0005	48.9	gi|1121272176|ref|WP_073586240.1|;gi|1114430534|emb|SHO58803.1|	hypothetical protein [Vibrio quintilis]<>hypothetical protein VQ7734_04575 [Vibrio quintilis]
Loki_gp18	23.24	185	129	4	5	176	10	194	0.0006	48.9	gi|1079648625|emb|SCW61866.1|	hypothetical protein SAMN02927924_01704 [Sphingobium faniae]
Loki_gp18	24.22	161	115	3	9	162	13	173	0.0006	48.9	gi|1120183694|ref|WP_073052076.1|;gi|1110335892|emb|SHF05683.1|	hypothetical protein [Kaistia soli]<>hypothetical protein SAMN02745157_1534 [Kaistia soli DSM 19436]
Loki_gp18	20.67	179	132	4	4	176	9	183	0.001	47.8	gi|1095212722|emb|SES76245.1|	Uncharacterized conserved protein [Variovorax sp. OV084]
Loki_gp18	25.17	151	101	3	38	176	43	193	0.03	44.3	gi|1055911539|ref|WP_067454914.1|;gi|1031927312|gb|OAM77691.1|	hypothetical protein [Devosia sp. S37]<>hypothetical protein A3840_08655 [Devosia sp. S37]
Loki_gp18	22.86	175	117	6	13	177	19	185	0.03	44.7	gi|787063911|dbj|BAR34855.1|	hypothetical protein [uncultured Mediterranean phage uvMED]
Loki_gp19	100	144	0	0	1	144	1	144	5e-104	301	gi|949419310|emb|CUS06480.1|	hypothetical protein [unclassified Siphoviridae]
Loki_gp19	73.61	144	37	1	1	143	1	144	3e-71	219	gi|589892163|ref|YP_009008528.1|;gi|583926717|gb|AHI60023.1|	hypothetical protein IME_AB3_24 [Acinetobacter phage IME_AB3]<>hypothetical protein IME_AB3_24 [Acinetobacter phage IME_AB3]
Loki_gp19	34.95	103	59	3	1	97	8	108	3e-09	60.8	gi|490371954|ref|WP_004251558.1|;gi|404596574|gb|EKA97094.1|;gi|702065682|gb|KGQ17418.1|;gi|721485704|gb|KGY29282.1|;gi|721498672|gb|KGY42193.1|;gi|721502843|gb|KGY46335.1|;gi|721558820|gb|KGZ02144.1|;gi|721595977|gb|KGZ39245.1|;gi|806987116|gb|KKC60076.1|;gi|1017167864|gb|KZE55750.1|	hypothetical protein [Proteus mirabilis]<>hypothetical protein HMPREF1310_02239 [Proteus mirabilis WGLW4]<>prophage PSSB64-02 [Proteus mirabilis]<>prophage PSSB64-02 [Proteus mirabilis]<>prophage PSSB64-02 [Proteus mirabilis]<>prophage PSSB64-02 [Proteus mirabilis]<>prophage PSSB64-02 [Proteus mirabilis]<>prophage PSSB64-02 [Proteus mirabilis]<>prophage PSSB64-02 [Proteus mirabilis]<>hypothetical…
Loki_gp19	34.95	103	59	3	1	97	8	108	4e-09	60.8	gi|896213074|ref|WP_049217138.1|;gi|955369650|gb|KSA07029.1|;gi|1026617357|gb|AND12354.1|	hypothetical protein [Proteus mirabilis]<>hypothetical protein AC442_06155 [Proteus mirabilis]<>hypothetical protein AOUC001_05490 [Proteus mirabilis]
Loki_gp19	33.98	103	60	3	1	97	8	108	5e-09	60.5	gi|225205380|gb|EEG87734.1|	hypothetical protein PROPEN_00035 [Proteus penneri ATCC 35198]
Loki_gp19	33.01	103	61	3	1	97	8	108	1e-08	59.3	gi|896199553|ref|WP_049206486.1|	prophage PSSB64-02 [Proteus mirabilis]
Loki_gp19	34.31	102	59	3	1	96	8	107	2e-08	59.3	gi|1100877444|ref|WP_071425312.1|;gi|1100285432|gb|OIK54937.1|	hypothetical protein [Proteus mirabilis]<>hypothetical protein BE839_07610 [Proteus mirabilis]
Loki_gp19	35.35	99	56	3	1	93	8	104	2e-08	59.3	gi|739066181|ref|WP_036937590.1|;gi|685171615|gb|KGA59272.1|	hypothetical protein [Proteus vulgaris]<>hypothetical protein DR95_1150 [Proteus vulgaris]
Loki_gp19	33.01	103	61	3	1	97	19	119	2e-08	59.3	gi|987439418|gb|KXC00073.1|	hypothetical protein HMPREF3203_02453 [Proteus mirabilis]
Loki_gp19	34.88	129	72	5	15	142	30	147	2e-08	59.3	gi|516841021|ref|WP_018125693.1|	hypothetical protein [Desulfovibrio oxyclinae]
Loki_gp19	35.35	99	56	3	1	93	8	104	2e-08	58.5	gi|1114053419|ref|WP_072071136.1|;gi|857774699|emb|CRL66232.1|	hypothetical protein [Proteus vulgaris]<>hypothetical protein BN1805_04049 [Proteus vulgaris]
Loki_gp19	39.08	87	45	3	13	93	20	104	3e-08	58.5	gi|1114053105|ref|WP_072070822.1|;gi|857775239|emb|CRL65780.1|	hypothetical protein [Proteus vulgaris]<>hypothetical protein BN1805_03570 [Proteus vulgaris]
Loki_gp19	36.67	90	49	3	13	96	20	107	4e-08	58.2	gi|739063776|ref|WP_036935187.1|;gi|685170849|gb|KGA58518.1|;gi|685233040|gb|KGA89662.1|	MULTISPECIES: hypothetical protein [Proteus]<>putative phage protein [Proteus vulgaris]<>putative phage protein [Proteus mirabilis]
Loki_gp19	35.35	99	56	3	1	93	8	104	4e-08	58.2	gi|501336161|ref|WP_012367796.1|;gi|194682311|emb|CAR42085.1|	hypothetical protein [Proteus mirabilis]<>phage protein [Proteus mirabilis HI4320]
Loki_gp19	34.34	99	57	3	1	93	8	104	6e-08	57.8	gi|1130902811|ref|WP_075672640.1|	hypothetical protein [Proteus sp. H24]
Loki_gp19	34.34	99	57	3	1	93	8	104	6e-08	57.8	gi|1114044721|ref|WP_072062629.1|;gi|857587509|emb|CRL59017.1|	hypothetical protein [Proteus vulgaris]<>hypothetical protein BN1804_00189 [Proteus vulgaris]
Loki_gp19	34.34	99	57	3	1	93	8	104	8e-08	57.4	gi|490362743|ref|WP_004242494.1|;gi|227164656|gb|EEI49521.1|	hypothetical protein [Proteus mirabilis]<>hypothetical protein HMPREF0693_0531 [Proteus mirabilis ATCC 29906]
Loki_gp19	34.34	99	57	3	1	93	8	104	1e-07	57	gi|1016535491|ref|WP_063109147.1|	hypothetical protein [Proteus mirabilis]
Loki_gp19	33.33	99	58	3	1	93	8	104	1e-07	57	gi|896216579|ref|WP_049219720.1|;gi|955367520|gb|KSA05000.1|;gi|960432524|gb|KSW14356.1|;gi|960709512|gb|KSY00149.1|;gi|1026618333|gb|AND13330.1|;gi|1033661602|gb|OAS31783.1|;gi|1033662900|gb|OAS33051.1|	hypothetical protein [Proteus mirabilis]<>hypothetical protein AC442_16815 [Proteus mirabilis]<>prophage PSSB64-02 [Proteus mirabilis]<>hypothetical protein APT96_02750 [Proteus mirabilis]<>hypothetical protein AOUC001_10710 [Proteus mirabilis]<>hypothetical protein A6V32_04735 [Proteus mirabilis]<>hypothetical protein A6V31_15035 [Proteus mirabilis]
Loki_gp19	33.33	99	58	3	1	93	8	104	2e-07	56.6	gi|529248914|ref|WP_020946070.1|;gi|529188945|gb|AGS60705.1|	hypothetical protein [Proteus mirabilis]<>phage protein [Proteus mirabilis BB2000]
Loki_gp19	36.78	87	47	3	13	93	20	104	2e-07	56.2	gi|490372096|ref|WP_004251700.1|;gi|404596621|gb|EKA97141.1|	hypothetical protein [Proteus mirabilis]<>hypothetical protein HMPREF1310_02286 [Proteus mirabilis WGLW4]
Loki_gp19	38.55	83	43	3	13	89	3	83	2e-07	55.1	gi|408634119|gb|EKL06392.1|	hypothetical protein VCHC17A1_4005, partial [Vibrio cholerae HC-17A1]
Loki_gp19	38.55	83	43	3	13	89	9	89	2e-07	55.1	gi|763259716|ref|WP_044124462.1|	hypothetical protein, partial [Vibrio cholerae]
Loki_gp19	36.78	87	47	3	13	93	31	115	3e-07	56.2	gi|227162885|gb|EEI47842.1|	hypothetical protein HMPREF0693_2218 [Proteus mirabilis ATCC 29906]
Loki_gp19	33.33	99	58	3	1	93	8	104	2e-06	53.9	gi|896206077|ref|WP_049212195.1|	hypothetical protein [Proteus mirabilis]
Loki_gp19	27.35	117	71	3	5	121	7	109	2e-06	53.5	gi|908645540|ref|WP_049789555.1|	hypothetical protein [Shewanella putrefaciens]
Loki_gp19	32.32	99	59	3	1	93	8	104	2e-06	53.5	gi|1124643924|ref|WP_074924494.1|;gi|1097634796|emb|SFH57632.1|	hypothetical protein [Proteus mirabilis]<>hypothetical protein SAMN04487853_13320 [Proteus mirabilis]
Loki_gp19	27.59	116	70	3	5	120	19	120	3e-06	53.5	gi|319427996|gb|ADV56070.1|;gi|319428236|gb|ADV56310.1|	hypothetical protein Sput200_3691 [Shewanella putrefaciens 200]<>hypothetical protein Sput200_3951 [Shewanella putrefaciens 200]
Loki_gp19	27.66	141	84	3	2	142	3	125	6e-06	52.4	gi|918358600|ref|WP_052412759.1|	hypothetical protein [Vibrio maritimus]
Loki_gp19	28.69	122	77	4	3	119	13	129	8e-06	52.4	gi|501344607|ref|WP_012376242.1|;gi|177842461|gb|ACB76713.1|	hypothetical protein [Opitutus terrae]<>conserved hypothetical protein [Opitutus terrae PB90-1]
Loki_gp19	31.91	94	55	2	3	94	11	97	1e-05	52	gi|947774243|ref|WP_056436025.1|;gi|944800676|gb|KQO51413.1|	hypothetical protein [Sphingomonas sp. Leaf257]<>hypothetical protein ASF14_07905 [Sphingomonas sp. Leaf257]
Loki_gp19	31.31	99	60	3	1	93	8	104	1e-05	52	gi|1114045967|ref|WP_072063875.1|;gi|857585647|emb|CRL62413.1|	hypothetical protein [Proteus vulgaris]<>hypothetical protein BN1804_01939 [Proteus vulgaris]
Loki_gp19	27.69	130	77	5	15	142	23	137	2e-05	51.6	gi|849060489|ref|YP_009151962.1|;gi|701946789|gb|AIW03881.1|	hypothetical protein CPT_Seurat18 [Escherichia phage Seurat]<>hypothetical protein CPT_Seurat18 [Escherichia phage Seurat]
Loki_gp19	27.69	130	77	5	15	142	29	143	2e-05	51.6	gi|971742356|ref|YP_009196811.1|;gi|971747745|ref|YP_009201600.1|;gi|768214059|gb|AJT60502.1|;gi|936910480|emb|CUL01095.1|;gi|1049308764|gb|ANY29811.1|	putative peptidase [Escherichia phage CAjan]<>unnamed protein product [Escherichia phage slur01]<>putative peptidase [Escherichia phage CAjan]<>unnamed protein product [Escherichia phage slur01]<>hypothetical protein [Escherichia phage Greed]
Loki_gp19	32.26	93	55	2	3	94	10	95	2e-05	51.2	gi|764702997|ref|WP_044463829.1|;gi|758849594|gb|AJO79368.1|	hypothetical protein [Pseudomonas sp. MRSN12121]<>prophage PSSB64-02 [Pseudomonas sp. MRSN12121]
Loki_gp19	31.68	101	57	4	1	93	8	104	3e-05	50.4	gi|1036668492|ref|WP_064720821.1|	hypothetical protein [Proteus hauseri]
Loki_gp19	36.05	86	49	4	13	93	3	87	3e-05	50.1	gi|1033972575|gb|OAT45354.1|	hypothetical protein M997_2902 [Proteus hauseri ATCC 700826]
Loki_gp19	32.22	90	53	2	3	91	10	92	4e-05	50.4	gi|982948753|ref|WP_060402351.1|;gi|982642335|gb|KWS64123.1|;gi|1041608732|emb|CZT29825.1|	MULTISPECIES: hypothetical protein [Pseudomonas]<>hypothetical protein AL055_01325 [Pseudomonas amygdali pv. morsprunorum]<>hypothetical protein PCPL58_3369 [Pseudomonas cerasi]
Loki_gp19	32.22	90	53	2	3	91	10	92	4e-05	50.4	gi|929529298|ref|WP_054070263.1|;gi|928333366|gb|KPB95759.1|	hypothetical protein [Pseudomonas syringae group genomosp. 3]<>Uncharacterized protein AC503_3083 [Pseudomonas syringae pv. maculicola]
Loki_gp19	28.46	130	74	4	3	131	10	121	4e-05	50.4	gi|330895345|gb|EGH27683.1|	hypothetical protein PSYJA_01069 [Pseudomonas syringae pv. japonica str. M301072]
Loki_gp19	27.97	143	78	6	3	142	10	130	4e-05	50.1	gi|739107897|ref|WP_036978081.1|;gi|577060022|gb|EUC97201.1|	hypothetical protein [Providencia alcalifaciens]<>hypothetical protein HMPREF1567_1493 [Providencia alcalifaciens PAL-2]
Loki_gp19	38.33	60	36	1	3	61	10	69	4e-05	48.9	gi|705515617|gb|KGS11773.1|	prophage PSSB64-02, partial [Pseudomonas coronafaciens]
Loki_gp19	28.46	130	74	4	3	131	10	121	5e-05	50.1	gi|330940158|gb|EGH43313.1|	hypothetical protein PSYPI_13326 [Pseudomonas syringae pv. pisi str. 1704B]
Loki_gp19	33.33	90	52	2	3	91	10	92	6e-05	49.7	gi|950522203|ref|WP_057405339.1|;gi|940135705|gb|KPX51898.1|	hypothetical protein [Pseudomonas amygdali]<>Uncharacterized protein ALO67_03778 [Pseudomonas amygdali pv. hibisci]
Loki_gp19	32.22	90	53	2	3	91	10	92	7e-05	49.7	gi|950558953|ref|WP_057429047.1|;gi|940016743|gb|KPW42328.1|	hypothetical protein [Pseudomonas syringae group genomosp. 3]<>Uncharacterized protein ALO87_00940 [Pseudomonas syringae pv. apii]
Loki_gp19	31.82	110	57	3	13	121	20	112	7e-05	49.7	gi|1114045122|ref|WP_072063030.1|;gi|857585598|emb|CRL63948.1|;gi|857586683|emb|CRL60102.1|	hypothetical protein [Proteus vulgaris]<>hypothetical protein BN1804_02752 [Proteus vulgaris]<>hypothetical protein BN1804_00751 [Proteus vulgaris]
Loki_gp19	32.22	90	53	2	3	91	10	92	7e-05	49.7	gi|490553020|ref|WP_004418127.1|;gi|443284270|gb|ELS43275.1|	hypothetical protein [Pseudomonas syringae]<>Prophage PSSB64-03, Orf12 [Pseudomonas syringae pv. syringae B64]
Loki_gp19	30.33	122	66	4	11	131	18	121	7e-05	49.7	gi|929539932|ref|WP_054079462.1|;gi|928315122|gb|KPB77977.1|;gi|939999950|gb|KPW26213.1|	MULTISPECIES: hypothetical protein [Pseudomonas syringae group]<>Uncharacterized protein AC507_1686 [Pseudomonas syringae pv. maculicola]<>putative prophage PSSB64-02, Orf12 [Pseudomonas syringae pv. alisalensis]
Loki_gp19	32.22	90	53	2	3	91	10	92	8e-05	49.3	gi|950597916|ref|WP_057458358.1|;gi|940243589|gb|KPY52839.1|	hypothetical protein [Pseudomonas syringae]<>Uncharacterized protein ALO46_00033 [Pseudomonas syringae pv. solidagae]
Loki_gp19	32.22	90	53	2	3	91	10	92	8e-05	49.3	gi|983016573|ref|WP_060412361.1|;gi|982692838|gb|KWT12074.1|	hypothetical protein [Pseudomonas syringae]<>hypothetical protein AL046_14365 [Pseudomonas syringae pv. avii]
Loki_gp19	32.22	90	53	2	3	91	10	92	9e-05	49.3	gi|1087132106|emb|SDH69057.1|;gi|1087280508|emb|SDN39412.1|	hypothetical protein SAMN05444503_105164 [Pseudomonas sp. BS3767]<>hypothetical protein SAMN05444502_105164 [Pseudomonas sp. BS3759]
Loki_gp19	28.46	130	74	4	3	131	10	121	9e-05	49.3	gi|940421440|ref|WP_055010119.1|;gi|940031840|gb|KPW56659.1|	hypothetical protein [Pseudomonas caricapapayae]<>Uncharacterized protein ALO80_00889 [Pseudomonas caricapapayae]
Loki_gp19	32.22	90	53	2	3	91	10	92	0.0001	48.9	gi|494453786|ref|WP_007244231.1|;gi|213927672|gb|EEB61219.1|;gi|695905825|gb|KGK96142.1|	hypothetical protein [Pseudomonas syringae group genomosp. 3]<>conserved hypothetical protein [Pseudomonas syringae pv. tomato T1]<>prophage PSSB64-02 [Pseudomonas syringae pv. tomato]
Loki_gp19	32.26	93	55	2	3	94	10	95	0.0001	48.9	gi|1087056575|emb|SDQ68805.1|	hypothetical protein SAMN05216487_3284 [Pseudomonas sp. UC 17F4]
Loki_gp19	32.22	90	53	2	3	91	10	92	0.0001	48.9	gi|497904465|ref|WP_010218621.1|	hypothetical protein [Pseudomonas syringae group genomosp. 3]
Loki_gp19	32.22	90	53	2	3	91	10	92	0.0001	48.9	gi|658307719|ref|YP_009043557.1|;gi|636483505|gb|AHZ95040.1|	hypothetical protein [Pseudomonas phage phiPSA1]<>hypothetical protein [Pseudomonas phage phiPSA1]
Loki_gp19	32.22	90	53	2	3	91	10	92	0.0001	48.9	gi|966369439|ref|WP_058417019.1|;gi|962098558|gb|KTB99047.1|	hypothetical protein [Pseudomonas sp. ICMP 10191]<>hypothetical protein AO388_00045 [Pseudomonas sp. ICMP 10191]
Loki_gp19	32.22	90	53	2	3	91	10	92	0.0001	48.5	gi|498125119|ref|WP_010439275.1|	hypothetical protein [Pseudomonas syringae]
Loki_gp19	35.48	62	39	1	1	61	8	69	0.0002	48.5	gi|1063267920|ref|WP_069368423.1|;gi|1063066768|gb|ODQ06385.1|;gi|1070220345|gb|OEI93926.1|;gi|1070235677|gb|OEJ07036.1|	MULTISPECIES: hypothetical protein [Shigella]<>hypothetical protein BGK50_18235 [Shigella sp. FC130]<>hypothetical protein BHE86_16980 [Shigella sp. FC1655]<>hypothetical protein BHE89_05585 [Shigella sp. FC1967]
Loki_gp19	32.22	90	53	2	3	91	10	92	0.0002	48.5	gi|519206058|gb|EPM91006.1|	hypothetical protein A259_39581 [Pseudomonas syringae pv. actinidiae ICMP 19070]
Loki_gp19	29.77	131	71	5	13	142	20	130	0.0002	48.5	gi|896204147|ref|WP_049210594.1|;gi|1097634800|emb|SFH56675.1|;gi|1100276194|gb|OIK52482.1|	hypothetical protein [Proteus mirabilis]<>hypothetical protein SAMN04487853_1322 [Proteus mirabilis]<>hypothetical protein BE839_16545 [Proteus mirabilis]
Loki_gp19	32.22	90	53	2	3	91	10	92	0.0002	48.5	gi|940415823|ref|WP_055005132.1|;gi|940282316|gb|KPY88942.1|	hypothetical protein [Pseudomonas syringae group genomosp. 7]<>Prophage PssSM-03, Orf14 [Pseudomonas syringae pv. tagetis]
Loki_gp19	32.22	90	53	2	3	91	10	92	0.0002	48.5	gi|940392808|ref|WP_054987330.1|;gi|940125862|gb|KPX42687.1|	hypothetical protein [Pseudomonas syringae group genomosp. 7]<>Prophage PssSM-03, Orf14 [Pseudomonas syringae pv. helianthi]
Loki_gp19	32.22	90	53	2	3	91	10	92	0.0002	48.5	gi|498102455|ref|WP_010416611.1|;gi|514087524|gb|EPF68259.1|;gi|666929889|gb|KEZ72775.1|	hypothetical protein [Pseudomonas syringae]<>Prophage PssSM-03, Orf14 [Pseudomonas syringae pv. syringae SM]<>hypothetical protein C5I_0117500 [Pseudomonas syringae pv. syringae FF5]
Loki_gp19	29.79	141	78	6	3	142	10	130	0.0002	48.5	gi|496196167|ref|WP_008916004.1|;gi|414093836|gb|EKT55506.1|	hypothetical protein [Providencia sneebia]<>phage protein [Providencia sneebia DSM 19967]
Loki_gp19	32.22	90	53	2	3	91	10	92	0.0002	48.5	gi|489514028|ref|WP_003418867.1|;gi|407995576|gb|EKG36099.1|	hypothetical protein [Pseudomonas syringae]<>hypothetical protein Pav037_3894 [Pseudomonas syringae pv. avellanae str. ISPaVe037]
Loki_gp19	32.22	90	53	2	3	91	10	92	0.0002	48.5	gi|966350740|ref|WP_058399396.1|;gi|962067073|gb|KTB77136.1|	hypothetical protein [Pseudomonas syringae]<>hypothetical protein AO072_14535 [Pseudomonas syringae ICMP 13102]
Loki_gp19	30.08	123	67	4	13	134	20	124	0.0002	48.5	gi|1001756513|ref|WP_061302526.1|;gi|1000389111|gb|KXK72138.1|	hypothetical protein [Pseudomonas monteilii]<>hypothetical protein BC89_03275 [Pseudomonas monteilii]
Loki_gp19	30.08	123	67	4	13	134	20	124	0.0002	48.5	gi|654449362|ref|WP_027919814.1|	hypothetical protein [Pseudomonas sp. URMO17WK12:I8]
Loki_gp19	31.18	93	56	2	3	94	10	95	0.0002	48.5	gi|1033049451|ref|WP_064361185.1|;gi|1013849946|gb|AMT89803.1|	hypothetical protein [Pseudomonas koreensis]<>hypothetical protein AYO71_20495 [Pseudomonas koreensis]
Loki_gp19	28.33	120	68	3	3	121	10	112	0.0002	48.5	gi|1084319505|ref|WP_070383696.1|;gi|1082505533|gb|AOX08674.1|	hypothetical protein [Pseudomonas putida]<>hypothetical protein Q5O_09820 [Pseudomonas putida JB]
Loki_gp19	32.22	90	53	2	3	91	10	92	0.0002	48.5	gi|490543469|ref|WP_004408593.1|;gi|330974330|gb|EGH74396.1|;gi|918459548|gb|KOG05630.1|;gi|939994967|gb|KPW21704.1|	hypothetical protein [Pseudomonas syringae]<>hypothetical protein PSYAR_27991 [Pseudomonas syringae pv. aceris str. M302273]<>Uncharacterized protein ABJ98_0380 [Pseudomonas syringae pv. aceris]<>Uncharacterized protein ALO91_01886 [Pseudomonas syringae pv. aceris]
Loki_gp19	32.22	90	53	2	3	91	10	92	0.0002	48.5	gi|499417377|ref|WP_011104841.1|;gi|28871185|ref|NP_793804.1|;gi|28854435|gb|AAO57499.1|;gi|814996041|gb|KKI25657.1|;gi|928331496|gb|KPB93952.1|;gi|940287866|gb|KPY94032.1|	hypothetical protein [Pseudomonas syringae group genomosp. 3]<>hypothetical protein PSPTO_4042 [[Pseudomonas syringae] pv. tomato str. DC3000]<>conserved hypothetical protein [[Pseudomonas syringae] pv. tomato str. DC3000]<>prophage PSSB64-02 [Pseudomonas syringae pv. persicae]<>Uncharacterized protein AC502_3739 [Pseudomonas syringae pv. maculicola]<>Uncharacterized protein ALO36_01745 [Pseudomo…
Loki_gp19	29.81	104	69	2	2	105	9	108	0.0002	48.5	gi|1120463567|ref|WP_073325396.1|;gi|1110252201|emb|SHH40244.1|	hypothetical protein [Aestuariibacter aggregatus]<>hypothetical protein SAMN05216361_0051 [Aestuariibacter aggregatus]
Loki_gp19	31.18	93	56	2	3	94	10	95	0.0002	48.1	gi|755702937|ref|WP_042559958.1|;gi|749475443|emb|CEL30194.1|	MULTISPECIES: hypothetical protein [Pseudomonas]<>hypothetical protein SRM1_03552 [Pseudomonas fluorescens]
Loki_gp19	26.47	102	70	1	3	99	11	112	0.0002	48.1	gi|504811847|ref|WP_014998949.1|;gi|407249847|gb|AFT79032.1|	hypothetical protein [Alteromonas macleodii]<>phage protein [Alteromonas macleodii str. 'Black Sea 11']
Loki_gp19	32.22	90	53	2	3	91	10	92	0.0002	48.1	gi|940419185|ref|WP_055007876.1|;gi|940038099|gb|KPW62551.1|	hypothetical protein [Pseudomonas caricapapayae]<>Uncharacterized protein ALO80_03136 [Pseudomonas caricapapayae]
Loki_gp19	31.11	90	54	2	3	91	10	92	0.0003	48.1	gi|639493843|ref|WP_024664865.1|	hypothetical protein [Pseudomonas syringae]
Loki_gp19	31.18	93	56	2	3	94	10	95	0.0003	48.1	gi|1085885841|emb|SDT24128.1|	hypothetical protein SAMN05216585_5199 [Pseudomonas chlororaphis]
Loki_gp19	32.22	90	53	2	3	91	10	92	0.0003	48.1	gi|763465097|ref|WP_044294384.1|;gi|761537860|gb|KIY18178.1|	hypothetical protein [Pseudomonas amygdali]<>prophage PSSB64-02 [Pseudomonas amygdali pv. tabaci]
Loki_gp19	30.08	123	67	4	13	134	20	124	0.0003	47.8	gi|746587240|ref|WP_039615343.1|;gi|742786827|gb|KIC79304.1|	hypothetical protein [Pseudomonas sp. C5pp]<>prophage PSSB64-02 [Pseudomonas sp. C5pp]
Loki_gp19	32.22	90	53	2	3	91	10	92	0.0003	47.8	gi|499416375|ref|WP_011103839.1|;gi|28869292|ref|NP_791911.1|;gi|28852533|gb|AAO55606.1|;gi|928328637|gb|KPB91211.1|	hypothetical protein [Pseudomonas syringae group genomosp. 3]<>hypothetical protein PSPTO_2088 [[Pseudomonas syringae] pv. tomato str. DC3000]<>conserved hypothetical protein [[Pseudomonas syringae] pv. tomato str. DC3000]<>Uncharacterized protein AC502_2079 [Pseudomonas syringae pv. maculicola]
Loki_gp19	31.18	93	56	2	3	94	10	95	0.0003	47.8	gi|1035778551|ref|WP_064588213.1|;gi|1033858078|gb|ANH98926.1|	hypothetical protein [Pseudomonas koreensis]<>hypothetical protein A8L59_16390 [Pseudomonas koreensis]
Loki_gp19	32.22	90	53	2	3	91	10	92	0.0003	47.8	gi|1124524249|ref|WP_074808303.1|;gi|1087297086|emb|SDN46909.1|	hypothetical protein [Pseudomonas syringae]<>hypothetical protein SAMN05444505_108167 [Pseudomonas syringae]
Loki_gp19	32.22	90	53	2	3	91	10	92	0.0003	47.8	gi|982948997|ref|WP_060402459.1|;gi|982639848|gb|KWS61727.1|	hypothetical protein [Pseudomonas amygdali]<>hypothetical protein AL055_27610 [Pseudomonas amygdali pv. morsprunorum]
Loki_gp19	31.18	93	56	2	3	94	10	95	0.0003	47.8	gi|829064013|ref|WP_047297607.1|	hypothetical protein [Pseudomonas fluorescens]
Loki_gp19	32.22	90	53	2	3	91	10	92	0.0003	47.8	gi|1124674426|ref|WP_074953425.1|;gi|1099465656|emb|SFH24563.1|	hypothetical protein [Pseudomonas syringae]<>hypothetical protein SAMN05444062_103551 [Pseudomonas syringae]
Loki_gp19	29.17	120	66	4	13	131	20	121	0.0004	47.8	gi|1032740917|ref|WP_064304647.1|;gi|1028506436|gb|OAI84863.1|	hypothetical protein [Pseudomonas putida]<>hypothetical protein AYO28_02995 [Pseudomonas putida]
Loki_gp19	33.33	72	47	1	6	76	23	94	0.0004	48.1	gi|910255210|ref|WP_050059711.1|	hypothetical protein [Silvibacterium bohemicum]
Loki_gp19	32.22	90	53	2	3	91	10	92	0.0004	47.8	gi|950520980|ref|WP_057404425.1|;gi|940141212|gb|KPX57115.1|	hypothetical protein [Pseudomonas amygdali]<>Uncharacterized protein ALO67_02307 [Pseudomonas amygdali pv. hibisci]
Loki_gp19	32.22	90	53	2	3	91	10	92	0.0004	47.8	gi|950524075|ref|WP_057407054.1|;gi|940146150|gb|KPX61783.1|;gi|970582876|gb|ALU60871.1|	hypothetical protein [Pseudomonas syringae]<>Uncharacterized protein ALO39_02847 [Pseudomonas syringae pv. lapsa]<>hypothetical protein ACA40_13740 [Pseudomonas syringae pv. lapsa]
Loki_gp19	31.11	90	54	2	3	91	10	92	0.0004	47.8	gi|639467370|ref|WP_024641611.1|	hypothetical protein [Pseudomonas syringae]
Loki_gp19	30.53	95	58	2	1	94	8	95	0.0004	47.8	gi|953318522|ref|WP_057978793.1|;gi|949219956|gb|KRP80961.1|	hypothetical protein [Pseudomonas sp. DSM 28142]<>prophage PSSB64-02 [Pseudomonas sp. DSM 28142]
Loki_gp19	32.22	90	53	2	3	91	10	92	0.0004	47.4	gi|929551459|ref|WP_054089916.1|;gi|928321027|gb|KPB83800.1|	hypothetical protein [Pseudomonas syringae group genomosp. 3]<>Prophage PssSM-03 [Pseudomonas syringae pv. maculicola]
Loki_gp19	28.46	130	74	4	3	131	10	121	0.0004	47.4	gi|492094518|ref|WP_005746970.1|;gi|330989568|gb|EGH87671.1|;gi|821148159|gb|KKY52719.1|;gi|928335883|gb|KPB98138.1|;gi|928359000|gb|KPC20416.1|	hypothetical protein [Pseudomonas amygdali]<>hypothetical protein PLA107_31409 [Pseudomonas amygdali pv. lachrymans str. M301315]<>prophage PSSB64-02 [Pseudomonas amygdali pv. lachrymans]<>Uncharacterized protein AC501_4545 [Pseudomonas amygdali pv. lachrymans]<>Uncharacterized protein AC499_2123 [Pseudomonas amygdali pv. lachrymans]
Loki_gp19	30.83	120	64	4	13	131	20	121	0.0004	47.4	gi|937350347|ref|WP_054572399.1|;gi|936617812|gb|KPM67252.1|	hypothetical protein [Pseudomonas putida]<>hypothetical protein HB13667_07655 [Pseudomonas putida]
Loki_gp19	28.24	131	75	4	3	132	10	122	0.0005	47.4	gi|950564813|ref|WP_057434436.1|;gi|940066745|gb|KPW88775.1|;gi|982672724|gb|KWS93100.1|	hypothetical protein [Pseudomonas syringae]<>Uncharacterized protein ALO79_03251 [Pseudomonas syringae pv. castaneae]<>hypothetical protein AL048_26495 [Pseudomonas syringae pv. castaneae]
Loki_gp19	28.46	123	69	4	13	134	20	124	0.0005	47.4	gi|1131044802|ref|WP_075804351.1|;gi|1130345263|gb|OLS61501.1|	hypothetical protein [Pseudomonas sp. GM4FR]<>hypothetical protein PSEMO_35680 [Pseudomonas sp. GM4FR]
Loki_gp19	29.77	131	71	5	13	142	20	130	0.0005	47.4	gi|1034541410|ref|WP_064506382.1|;gi|1028068225|gb|OAH92785.1|	hypothetical protein [Proteus mirabilis]<>hypothetical protein AZH52_10275 [Proteus mirabilis]
Loki_gp19	26.15	130	77	4	3	131	10	121	0.0005	47.4	gi|654782687|ref|WP_028236793.1|	hypothetical protein [Pseudomonas brassicacearum]
Loki_gp20	100	820	0	0	1	820	1	820	0	1684	gi|949419311|emb|CUS06481.1|	putative tail fibre protein [unclassified Siphoviridae]
Loki_gp20	80	820	164	0	1	820	1	820	0	1375	gi|589892162|ref|YP_009008527.1|;gi|583926716|gb|AHI60022.1|	putative tail protein [Acinetobacter phage IME_AB3]<>putative tail protein [Acinetobacter phage IME_AB3]
Loki_gp20	35.95	523	296	13	59	558	46	552	4e-70	258	gi|759641154|ref|WP_043358850.1|	hypothetical protein [Methyloversatilis universalis]
Loki_gp20	35.95	523	296	13	59	558	69	575	4e-70	258	gi|333445430|gb|EGK73372.1|	hypothetical protein METUNv1_00550 [Methyloversatilis universalis FAM5]
Loki_gp20	28.24	687	427	21	10	663	23	676	6e-70	253	gi|491783133|ref|WP_005596685.1|;gi|306853718|gb|EFM85935.1|;gi|306862631|gb|EFM94587.1|;gi|306867141|gb|EFM98997.1|	hypothetical protein [Actinobacillus pleuropneumoniae]<>hypothetical protein appser1_5820 [Actinobacillus pleuropneumoniae serovar 1 str. 4074]<>hypothetical protein appser9_5800 [Actinobacillus pleuropneumoniae serovar 9 str. CVJ13261]<>hypothetical protein appser11_5880 [Actinobacillus pleuropneumoniae serovar 11 str. 56153]
Loki_gp20	36.58	380	221	7	66	428	20	396	4e-64	240	gi|916319680|ref|WP_051054726.1|	hypothetical protein [Opitutaceae bacterium TAV1]
Loki_gp20	36.58	380	221	7	66	428	52	428	5e-64	240	gi|391218461|gb|EIP96881.1|	hypothetical protein OpiT1DRAFT_01308 [Opitutaceae bacterium TAV1]
Loki_gp20	31.91	539	315	13	13	516	43	564	7e-64	240	gi|497719126|ref|WP_010033310.1|	hypothetical protein [Gemmata obscuriglobus]
Loki_gp20	33.4	476	290	11	63	520	4	470	1e-61	231	gi|494679278|ref|WP_007436613.1|;gi|363717803|gb|EHM01165.1|	hypothetical protein [Acetobacteraceae bacterium AT-5844]<>hypothetical protein HMPREF9946_02240 [Acetobacteraceae bacterium AT-5844]
Loki_gp20	33.52	531	316	14	9	514	12	530	2e-61	233	gi|1088417483|gb|OHC55749.1|;gi|1088419945|gb|OHC58150.1|	host specificity protein J [Rhodobacterales bacterium RIFCSPHIGHO2_02_FULL_62_130]<>host specificity protein J [Rhodobacterales bacterium RIFCSPHIGHO2_12_FULL_62_75]
Loki_gp20	32.96	446	265	7	59	479	55	491	7e-60	231	gi|495759472|ref|WP_008484051.1|;gi|407205204|gb|EKE75180.1|	hypothetical protein [Gallaecimonas xiamenensis]<>Membrane protein [Gallaecimonas xiamenensis 3-C-1]
Loki_gp20	29.41	561	319	17	138	659	203	725	2e-59	229	gi|1094022231|ref|WP_071018169.1|;gi|1092243932|gb|AOZ02266.1|	hypothetical protein [Cupriavidus sp. USMAHM13]<>hypothetical protein BKK81_23575 [Cupriavidus sp. USMAHM13]
Loki_gp20	34.61	471	279	13	1	450	1	463	3e-59	226	gi|1088834688|emb|SDY30172.1|	Putative phage tail protein [Lentibacter algarum]
Loki_gp20	31.33	482	283	10	69	516	1	468	2e-58	224	gi|521962644|ref|WP_020474249.1|	hypothetical protein, partial [Zavarzinella formosa]
Loki_gp20	34.39	471	280	13	1	450	1	463	2e-58	224	gi|959687716|ref|WP_058124235.1|;gi|950305063|emb|CUH61548.1|;gi|1109950327|emb|SHJ07472.1|	host specificity protein J [Thalassobacter stenotrophicus]<>hypothetical protein THS5294_02859 [Thalassobacter stenotrophicus]<>Putative phage tail protein [Thalassobacter stenotrophicus DSM 16310]
Loki_gp20	34.2	424	252	8	67	475	63	474	4e-58	227	gi|504424405|ref|WP_014611507.1|;gi|319427995|gb|ADV56069.1|;gi|319428235|gb|ADV56309.1|	membrane protein [Shewanella putrefaciens]<>Membrane protein [Shewanella putrefaciens 200]<>Membrane protein [Shewanella putrefaciens 200]
Loki_gp20	32.03	462	296	10	1	459	1	447	5e-58	224	gi|1028867293|ref|WP_064035136.1|	phage tail protein [Salmonella enterica]
Loki_gp20	35.54	439	260	11	1	422	1	433	7e-58	223	gi|740163652|ref|WP_038007159.1|;gi|695955308|gb|KGL00968.1|	host specificity protein J [Thalassobacter sp. 16PALIMAR09]<>host specificity protein J [Thalassobacter sp. 16PALIMAR09]
Loki_gp20	37.64	348	201	6	130	475	243	576	7e-58	220	gi|1011002121|ref|WP_061960236.1|	hypothetical protein, partial [Cupriavidus pauculus]
Loki_gp20	35.03	471	277	14	1	450	1	463	7e-58	222	gi|960348666|ref|WP_058243536.1|;gi|950322402|emb|CUH70036.1|;gi|950333625|emb|CUH72334.1|	host specificity protein J [Thalassobius mediterraneus]<>hypothetical protein TL5118_04011 [Thalassobius mediterraneus]<>hypothetical protein TL5120_02130 [Thalassobius mediterraneus]
Loki_gp20	34.39	471	280	13	1	450	1	463	2e-57	221	gi|873893251|ref|WP_048599769.1|;gi|857844381|emb|CRK76355.1|;gi|950304985|emb|CUH61470.1|;gi|1097160096|emb|SFJ79234.1|;gi|1109950404|emb|SHJ09060.1|	MULTISPECIES: host specificity protein J [Rhodobacteraceae]<>hypothetical protein NIG5292_02415 [Nereida ignava]<>hypothetical protein THS5294_02778 [Thalassobacter stenotrophicus]<>Putative phage tail protein [Nereida ignava DSM 16309]<>Putative phage tail protein [Thalassobacter stenotrophicus DSM 16310]
Loki_gp20	32.25	462	295	11	1	459	1	447	2e-57	222	gi|1046456408|emb|SBW25594.1|	Phage tail fiber protein [Citrobacter europaeus]
Loki_gp20	35.9	376	224	8	67	427	71	444	3e-57	221	gi|1097640790|emb|SFK78223.1|	Putative phage tail protein [Shimia haliotis]
Loki_gp20	32.25	462	295	11	1	459	1	447	4e-57	221	gi|1062659627|ref|WP_069325442.1|	phage tail protein [Citrobacter sp. CFSAN044567]
Loki_gp20	31.04	480	313	10	1	475	1	467	4e-57	219	gi|1124643891|ref|WP_074924462.1|;gi|1097634799|emb|SFH56653.1|	phage tail protein, partial [Proteus mirabilis]<>Putative phage tail protein, partial [Proteus mirabilis]
Loki_gp20	32.03	462	296	11	1	459	1	447	4e-57	219	gi|1115881898|gb|OKK29062.1|	phage tail protein, partial [Salmonella enterica subsp. enterica serovar Typhi]
Loki_gp20	30.93	472	267	10	6	428	7	468	5e-57	219	gi|918228903|ref|WP_052362035.1|	hypothetical protein [Diplosphaera colitermitum]
Loki_gp20	32.25	462	295	11	1	459	1	447	5e-57	221	gi|970538361|ref|WP_058806115.1|;gi|969350305|gb|KUD76433.1|	phage tail protein [Salmonella enterica]<>tail protein [Salmonella enterica subsp. enterica serovar Kentucky]
Loki_gp20	32.03	462	296	11	1	459	1	447	9e-57	220	gi|919927561|ref|WP_052910050.1|;gi|912231238|gb|KNV20175.1|;gi|1046027999|gb|OCI45063.1|;gi|1131475484|gb|OLW75334.1|	phage tail protein [Salmonella enterica]<>phage tail protein [Salmonella enterica subsp. enterica serovar Infantis]<>phage tail protein [Salmonella enterica subsp. enterica serovar Infantis]<>tail protein [Salmonella enterica subsp. enterica serovar Infantis str. CVM N23532]
Loki_gp20	32.03	462	296	11	1	459	1	447	9e-57	220	gi|919920906|ref|WP_052908775.1|;gi|911540981|gb|KNN82382.1|	phage tail protein [Salmonella enterica]<>phage tail protein [Salmonella enterica subsp. enterica serovar Infantis]
Loki_gp20	32.03	462	296	11	1	459	1	447	1e-56	218	gi|353648060|gb|EHC91038.1|	Phage host specificity protein J, partial [Salmonella enterica subsp. enterica serovar Senftenberg str. A4-543]
Loki_gp20	32.03	462	296	11	1	459	1	447	1e-56	220	gi|566073823|ref|WP_023993423.1|;gi|564964222|gb|ETE50894.1|;gi|735704352|gb|KHO75110.1|;gi|735710612|gb|KHO81299.1|;gi|735845169|gb|KHQ14450.1|;gi|967617154|gb|KTM65167.1|;gi|967652244|gb|KTM99525.1|;gi|974966395|gb|KUR45045.1|;gi|1127370254|gb|APR91656.1|;gi|1127382547|gb|APS03944.1|;gi|1127386935|gb|APS08330.1|;gi|1127390249|gb|APS11642.1|	phage tail protein [Salmonella enterica]<>phage tail protein [Salmonella enterica subsp. enterica serovar Infantis str. 119944]<>tail protein [Salmonella enterica subsp. enterica]<>tail protein [Salmonella enterica subsp. enterica]<>tail protein [Salmonella enterica subsp. enterica]<>tail protein [Salmonella enterica]<>tail protein [Salmonella enterica]<>phage tail protein [Salmonella enterica su…
Loki_gp20	32.03	462	296	11	1	459	1	447	1e-56	219	gi|507079712|ref|WP_016150470.1|;gi|500558903|gb|EOQ22905.1|	hypothetical protein [Citrobacter sp. KTE30]<>hypothetical protein WC1_02463 [Citrobacter sp. KTE30]
Loki_gp20	32.03	462	296	11	1	459	1	447	1e-56	219	gi|817709064|ref|WP_046671173.1|;gi|816228362|gb|KKJ87192.1|	tail protein [Citrobacter freundii]<>tail protein [Citrobacter freundii]
Loki_gp20	32.03	462	296	11	1	459	1	447	1e-56	219	gi|895896469|ref|WP_048997956.1|	tail protein [Citrobacter freundii]
Loki_gp20	32.03	462	296	11	1	459	1	447	2e-56	219	gi|985629061|ref|WP_060855147.1|;gi|985306021|gb|KWZ90668.1|	phage tail protein [Citrobacter freundii]<>hypothetical protein HMPREF3212_02493 [Citrobacter freundii]
Loki_gp20	32.03	462	296	11	1	459	1	447	2e-56	219	gi|554922265|ref|WP_023194825.1|;gi|554057293|gb|ESF01896.1|;gi|911362860|gb|KNM17049.1|;gi|911411818|gb|KNM62591.1|;gi|911623377|gb|KNO59343.1|;gi|968950300|gb|KTZ85364.1|;gi|969187481|gb|KUC17237.1|	phage tail protein [Salmonella enterica]<>phage tail protein [Salmonella enterica subsp. enterica serovar Worthington str. ATCC 9607]<>phage tail protein [Salmonella enterica subsp. enterica serovar Worthington]<>phage tail protein [Salmonella enterica subsp. enterica serovar Worthington]<>phage tail protein [Salmonella enterica subsp. enterica serovar Worthington]<>tail protein [Salmonella enter…
Loki_gp20	34.18	471	281	13	1	450	1	463	2e-56	218	gi|740165746|ref|WP_038009035.1|;gi|695954164|gb|KGK99900.1|	host specificity protein J [Thalassobacter sp. 16PALIMAR09]<>host specificity protein J [Thalassobacter sp. 16PALIMAR09]
Loki_gp20	30.83	480	314	10	1	475	1	467	2e-56	219	gi|988881538|ref|WP_060961290.1|;gi|987439711|gb|KXC00362.1|	phage tail protein [Proteus mirabilis]<>fibronectin type III domain protein [Proteus mirabilis]
Loki_gp20	32.03	462	296	11	1	459	1	447	2e-56	218	gi|924626392|ref|WP_053530278.1|	phage tail protein, partial [Salmonella enterica]
Loki_gp20	32.03	462	296	11	1	459	1	447	2e-56	219	gi|740856827|ref|WP_038642079.1|;gi|619738922|gb|AHY14161.1|	tail protein [Citrobacter freundii]<>tail protein [Citrobacter freundii CFNIH1]
Loki_gp20	32.03	462	296	11	1	459	1	447	2e-56	219	gi|757572540|ref|WP_042827532.1|;gi|677790976|gb|KFT09642.1|;gi|677825722|gb|KFT42387.1|;gi|677891493|gb|KFU04408.1|;gi|677899882|gb|KFU12356.1|	tail protein [Salmonella enterica]<>tail protein [Salmonella enterica subsp. enterica serovar Bareilly str. CFSAN000227]<>tail protein [Salmonella enterica subsp. enterica serovar Bareilly str. CFSAN000216]<>tail protein [Salmonella enterica subsp. enterica serovar Bareilly str. CFSAN000199]<>tail protein [Salmonella enterica subsp. enterica serovar Bareilly str. CFSAN000196]
Loki_gp20	32.03	462	296	11	1	459	1	447	2e-56	219	gi|970527407|ref|WP_058800039.1|;gi|968922920|gb|KTZ58744.1|;gi|968937075|gb|KTZ72498.1|	phage tail protein [Salmonella enterica]<>tail protein [Salmonella enterica subsp. enterica serovar Senftenberg]<>tail protein [Salmonella enterica subsp. enterica serovar Senftenberg]
Loki_gp20	32.03	462	296	11	1	459	1	447	3e-56	219	gi|746480133|ref|WP_039517955.1|;gi|735746256|gb|KHP16645.1|;gi|758747210|gb|KIV44526.1|;gi|758747408|gb|KIV44723.1|;gi|919860842|gb|KOK96797.1|;gi|980997774|dbj|GAS40723.1|;gi|981001645|dbj|GAR16178.1|;gi|981200310|dbj|GAR60803.1|;gi|1004439867|gb|KYB49414.1|;gi|1004441921|gb|KYB51406.1|;gi|1004443036|gb|KYB52493.1|;gi|1004453288|gb|KYB62430.1|;gi|1004457502|gb|KYB66497.1|;gi|1004459531|gb|KYB68…	tail protein [Salmonella enterica]<>tail protein [Salmonella enterica subsp. enterica]<>tail protein [Salmonella enterica subsp. enterica]<>tail protein [Salmonella enterica subsp. enterica]<>phage tail protein [Salmonella enterica subsp. enterica serovar Mbandaka]<>hypothetical protein NGUA33_01197 [Salmonella enterica]<>hypothetical protein NGUA05_02249 [Salmonella enterica]<>hypothetical prote…
Loki_gp20	29.98	557	321	16	138	659	246	768	3e-56	220	gi|1094078569|ref|WP_071069917.1|;gi|1092248429|gb|AOZ06761.1|	hypothetical protein [Cupriavidus sp. USMAA1020]<>hypothetical protein BKK80_13740 [Cupriavidus sp. USMAA1020]
Loki_gp20	32.03	462	296	11	1	459	1	447	3e-56	218	gi|771499029|ref|WP_045159945.1|;gi|733587284|emb|CEI42594.1|	tail protein [Salmonella enterica]<>Phage tail fiber protein [Salmonella enterica subsp. enterica serovar Infantis]
Loki_gp20	32.03	462	296	11	1	459	1	447	3e-56	218	gi|835639041|ref|WP_047595684.1|;gi|677804492|gb|KFT22196.1|	tail protein [Salmonella enterica]<>tail protein [Salmonella enterica subsp. enterica serovar Bareilly str. CFSAN000219]
Loki_gp20	32.03	462	296	11	1	459	1	447	3e-56	218	gi|447033217|ref|WP_001110473.1|;gi|353651955|gb|EHC93922.1|;gi|363568977|gb|EHL52943.1|;gi|379982838|emb|CCF91004.1|;gi|451937776|gb|AGF88072.1|;gi|523820216|gb|AGQ75497.1|;gi|553437192|gb|ESB62328.1|;gi|554186440|gb|ESG25375.1|;gi|554270868|gb|ESH06864.1|;gi|560203414|gb|ESV49718.1|;gi|735815185|gb|KHP84723.1|;gi|817616256|gb|AKF88579.1|;gi|912261256|gb|KNV49126.1|;gi|912425094|gb|KNX06602.1|;g…	tail protein [Salmonella enterica]<>Phage tail fiber protein [Salmonella enterica subsp. enterica serovar Uganda str. R8-3404]<>phage tail protein [Salmonella enterica subsp. enterica serovar Montevideo str. SARB30]<>putative tail fiber protein [Salmonella enterica subsp. enterica serovar Senftenberg str. SS209]<>tail fiber protein [Salmonella phage FSL SP-016]<>tail protein [Salmonella enterica …
Loki_gp20	31.47	464	300	10	1	459	1	451	3e-56	219	gi|896215764|ref|WP_049219067.1|	tail protein [Proteus mirabilis]
Loki_gp20	32.03	462	296	11	1	459	1	447	3e-56	218	gi|920034798|ref|WP_052938548.1|;gi|911039265|gb|KNI14117.1|;gi|911101958|gb|KNI72299.1|;gi|911217760|gb|KNK80981.1|;gi|911727138|gb|KNP56405.1|;gi|911993180|gb|KNS95226.1|;gi|912041668|gb|KNT41012.1|;gi|912138959|gb|KNU32213.1|;gi|912192667|gb|KNU83077.1|;gi|912203538|gb|KNU93423.1|;gi|912249283|gb|KNV37635.1|;gi|912335001|gb|KNW19536.1|;gi|912386687|gb|KNW69328.1|;gi|919767247|gb|KOK08782.1|;gi…	phage tail protein [Salmonella enterica]<>phage tail protein [Salmonella enterica subsp. enterica serovar Schwarzengrund]<>phage tail protein [Salmonella enterica subsp. enterica serovar Schwarzengrund]<>phage tail protein [Salmonella enterica subsp. enterica serovar Schwarzengrund]<>phage tail protein [Salmonella enterica subsp. enterica serovar Schwarzengrund]<>phage tail protein [Salmonella en…
Loki_gp20	32.03	462	296	11	1	459	1	447	3e-56	218	gi|583241096|ref|WP_024157370.1|;gi|1102568860|gb|OIV15656.1|	tail protein [Salmonella enterica]<>phage tail protein [Salmonella enterica subsp. enterica serovar Oranienburg]
Loki_gp20	32.03	462	296	11	1	459	1	447	3e-56	218	gi|498720489|ref|WP_010835814.1|;gi|484818733|emb|CCR44440.1|	phage host specificity protein [Salmonella enterica]<>Phage host specificity protein [Salmonella enterica subsp. enterica serovar Agona str. 63.H.87]
Loki_gp20	31.25	464	301	9	1	459	1	451	3e-56	220	gi|1130904336|ref|WP_075674154.1|	hypothetical protein [Proteus sp. H24]
Loki_gp20	34.29	452	252	14	67	491	71	504	3e-56	218	gi|497497063|ref|WP_009811261.1|;gi|85827090|gb|EAQ47286.1|	host specificity protein J [Roseobacter sp. MED193]<>host specificity protein J, internal deletion [Roseobacter sp. MED193]
Loki_gp20	32.03	462	296	11	1	459	1	447	3e-56	218	gi|555260622|ref|WP_023242814.1|;gi|554358500|gb|ESH95757.1|	phage tail protein [Salmonella enterica]<>phage tail protein [Salmonella enterica subsp. enterica serovar Agona str. 632182-2]
Loki_gp20	33.97	471	282	14	1	450	1	463	4e-56	217	gi|740165699|ref|WP_038008997.1|;gi|695954178|gb|KGK99911.1|	host specificity protein J [Thalassobacter sp. 16PALIMAR09]<>host specificity protein J [Thalassobacter sp. 16PALIMAR09]
Loki_gp20	31.47	464	300	10	1	459	1	451	4e-56	219	gi|896264142|ref|WP_049255018.1|	tail protein [Proteus mirabilis]
Loki_gp20	31.47	464	300	10	1	459	1	451	5e-56	218	gi|896213644|ref|WP_049217583.1|	tail protein, partial [Proteus mirabilis]
Loki_gp20	32.09	483	294	15	1	475	1	457	5e-56	218	gi|921139937|ref|WP_053090183.1|	phage tail protein [Franconibacter helveticus]
Loki_gp20	33.33	474	278	14	24	474	31	489	5e-56	217	gi|1094611782|emb|SEO90309.1|	Putative phage tail protein [Salinihabitans flavidus]
Loki_gp20	33.13	483	269	14	23	474	30	489	6e-56	217	gi|1094611300|emb|SEP02997.1|	Putative phage tail protein [Salinihabitans flavidus]
Loki_gp20	32.48	468	287	12	1	459	1	448	8e-56	217	gi|983401352|ref|WP_060569257.1|;gi|960743210|gb|KSY32914.1|	phage tail protein [Citrobacter sp. 50677481]<>phage tail protein [Citrobacter sp. 50677481]
Loki_gp20	31.25	464	301	9	1	459	1	451	9e-56	218	gi|739023784|ref|WP_036904984.1|;gi|721497052|gb|KGY40573.1|	tail protein [Proteus mirabilis]<>tail protein [Proteus mirabilis]
Loki_gp20	31.82	462	297	11	1	459	1	447	1e-55	217	gi|555273034|ref|WP_023252584.1|;gi|554422315|gb|ESJ48591.1|;gi|554422683|gb|ESJ48858.1|	phage tail protein [Salmonella enterica]<>phage tail protein [Salmonella enterica subsp. enterica serovar Cubana str. CFSAN001083]<>phage tail protein [Salmonella enterica subsp. enterica serovar Cubana str. CFSAN001083]
Loki_gp20	31.03	464	302	9	1	459	1	451	1e-55	218	gi|1114045121|ref|WP_072063029.1|;gi|857585597|emb|CRL63947.1|;gi|857586682|emb|CRL60100.1|	phage tail protein [Proteus vulgaris]<>Fibronectin type III domain protein [Proteus vulgaris]<>Fibronectin type III domain protein [Proteus vulgaris]
Loki_gp20	32.03	462	296	11	1	459	1	447	1e-55	217	gi|1103722803|ref|WP_071684490.1|;gi|1103056331|gb|OIY05076.1|;gi|1103203044|gb|OIZ48592.1|	phage tail protein [Citrobacter freundii]<>phage tail protein [Citrobacter freundii]<>phage tail protein [Citrobacter freundii]
Loki_gp20	31.6	462	298	11	1	459	1	447	1e-55	216	gi|1004676493|ref|WP_061550065.1|;gi|1004510763|gb|KYC14520.1|	phage tail protein [Citrobacter sp. AATXR]<>phage tail protein [Citrobacter sp. AATXR]
Loki_gp20	31.25	464	301	10	1	459	1	451	2e-55	217	gi|516438349|ref|WP_017827261.1|	hypothetical protein, partial [Proteus mirabilis]
Loki_gp20	30.82	464	303	10	1	459	1	451	2e-55	217	gi|739024095|ref|WP_036905292.1|;gi|721497690|gb|KGY41211.1|	tail protein [Proteus mirabilis]<>tail protein [Proteus mirabilis]
Loki_gp20	31.25	464	301	10	1	459	1	451	3e-55	217	gi|921138472|ref|WP_053088718.1|	hypothetical protein [Proteus mirabilis]
Loki_gp20	31.6	462	298	11	1	459	1	447	3e-55	215	gi|1051744967|ref|WP_065944740.1|;gi|1050864636|gb|ANZ86833.1|	phage tail protein [Citrobacter freundii]<>tail protein [Citrobacter freundii]
Loki_gp20	31.6	462	298	11	1	459	1	447	4e-55	215	gi|851921646|ref|WP_048217929.1|;gi|838573262|gb|KLV57761.1|	tail protein [Citrobacter sp. MGH103]<>hypothetical protein SK33_00424 [Citrobacter sp. MGH103]
Loki_gp20	32.26	468	288	12	1	459	1	448	5e-55	215	gi|754934805|ref|WP_042291533.1|	tail protein [Citrobacter sedlakii]
Loki_gp20	31.03	464	302	9	1	459	1	451	6e-55	215	gi|917582674|ref|WP_052174194.1|	phage tail protein [Proteus mirabilis]
Loki_gp20	28.84	541	346	13	1	516	1	527	1e-54	208	gi|296267788|gb|EFH13609.1|	hypothetical protein HMPREF0731_0146, partial [Roseomonas cervicalis ATCC 49957]
Loki_gp20	31.82	462	297	11	1	459	1	447	1e-54	213	gi|489938390|ref|WP_003841697.1|;gi|411770965|gb|EKS54693.1|;gi|588299811|gb|EXF29113.1|;gi|668709950|gb|KFB95731.1|;gi|689845076|dbj|GAL39609.1|	phage tail protein [Citrobacter freundii]<>phage tail protein [Citrobacter freundii ATCC 8090 = MTCC 1658]<>tail protein [Citrobacter freundii RLS1]<>phage tail fiber protein [Citrobacter freundii ATCC 8090 = MTCC 1658]<>putative phage tail protein [Citrobacter freundii NBRC 12681]
Loki_gp20	32.21	416	265	9	49	459	11	414	1e-54	209	gi|831646659|gb|KLU19421.1|	tail protein, partial [Proteus mirabilis]
Loki_gp20	35.28	377	227	7	23	384	30	404	2e-54	203	gi|1097184332|emb|SFL09417.1|	Putative phage tail protein, partial [Celeribacter marinus]
Loki_gp20	30.63	457	300	8	1	452	1	445	2e-54	214	gi|225203215|gb|EEG85569.1|	fibronectin type III domain protein [Proteus penneri ATCC 35198]
Loki_gp20	33.12	471	286	12	1	450	1	463	2e-54	212	gi|740165814|ref|WP_038009093.1|;gi|695954097|gb|KGK99850.1|	host specificity protein J [Thalassobacter sp. 16PALIMAR09]<>host specificity protein J [Thalassobacter sp. 16PALIMAR09]
Loki_gp20	34.11	387	238	7	23	394	30	414	3e-54	206	gi|1097184340|emb|SFL09174.1|	Putative phage tail protein, partial [Celeribacter marinus]
Loki_gp20	32.78	421	260	11	59	475	20	421	4e-54	212	gi|639221850|ref|WP_024559273.1|	tail protein [Franconibacter pulveris]
Loki_gp20	35.98	378	220	10	138	506	223	587	4e-54	213	gi|1094081486|ref|WP_071072834.1|;gi|1092252024|gb|AOZ10355.1|	hypothetical protein [Cupriavidus sp. USMAA1020]<>hypothetical protein BKK80_32735 [Cupriavidus sp. USMAA1020]
Loki_gp20	30.82	464	303	10	1	459	1	451	4e-54	214	gi|1098551840|ref|WP_071233552.1|;gi|1095485423|gb|OHY48060.1|	hypothetical protein [Proteus mirabilis]<>hypothetical protein BBX45_10295 [Proteus mirabilis]
Loki_gp20	34.61	471	279	14	1	450	1	463	6e-54	211	gi|740166625|ref|WP_038009779.1|;gi|695754211|gb|KGK78278.1|	host specificity protein J [Thalassobacter stenotrophicus]<>host specificity protein J [Thalassobacter stenotrophicus]
Loki_gp20	32.29	446	268	11	30	453	36	469	7e-54	203	gi|501560847|ref|WP_012565329.1|;gi|209956902|gb|ACI97538.1|	phage tail protein [Rhodospirillum centenum]<>phage tail protein, putative [Rhodospirillum centenum SW]
Loki_gp20	29.96	474	308	9	1	471	1	453	1e-53	211	gi|780200544|ref|WP_045514082.1|	tail protein [Kosakonia oryzae]
Loki_gp20	31.39	462	299	11	1	459	1	447	1e-53	211	gi|817108154|ref|WP_046481421.1|;gi|449328501|gb|AGE94801.1|	tail protein [Citrobacter amalonaticus]<>tail protein [Citrobacter amalonaticus Y19]
Loki_gp20	31.04	451	287	11	24	471	24	453	1e-53	211	gi|1092535151|ref|WP_070518355.1|;gi|1081374126|gb|OFV11329.1|	phage tail protein [Salmonella sp. HMSC13B08]<>phage tail protein [Salmonella sp. HMSC13B08]
Loki_gp20	32.78	421	260	11	59	475	20	421	2e-53	210	gi|639222042|ref|WP_024559449.1|	tail protein [Franconibacter pulveris]
Loki_gp20	31.6	462	298	11	1	459	1	447	2e-53	210	gi|763400141|ref|WP_044257091.1|	tail protein [Citrobacter sp. JT3]
Loki_gp20	31.77	406	258	10	59	459	56	447	2e-53	210	gi|668969662|gb|KFC86220.1|	phage tail fiber protein [Hafnia alvei ATCC 13337]
Loki_gp20	31.6	462	298	11	1	459	1	447	2e-53	210	gi|851929283|ref|WP_048221292.1|;gi|838582501|gb|KLV66958.1|	tail protein [Citrobacter sp. MGH106]<>hypothetical protein SK36_01677 [Citrobacter sp. MGH106]
Loki_gp20	31.17	462	300	11	1	459	1	447	2e-53	210	gi|992390263|ref|WP_061077253.1|;gi|991931130|gb|AMG94335.1|	phage tail protein [Citrobacter amalonaticus]<>phage tail protein [Citrobacter amalonaticus]
Loki_gp20	31.53	463	297	12	1	459	1	447	2e-53	210	gi|992382765|ref|WP_061069759.1|;gi|991890037|gb|AMG53256.1|	phage tail protein [Citrobacter amalonaticus]<>phage tail protein [Citrobacter amalonaticus]
Loki_gp20	31.25	464	297	13	1	459	1	447	3e-53	210	gi|836569384|ref|WP_047727419.1|;gi|829354920|gb|KLQ47178.1|;gi|974941760|gb|KUR21778.1|;gi|1021971575|gb|KZQ17543.1|	tail protein [Enterobacter hormaechei]<>tail protein [Enterobacter hormaechei subsp. steigerwaltii]<>phage tail protein [Enterobacter hormaechei subsp. steigerwaltii]<>phage tail protein [Enterobacter hormaechei subsp. steigerwaltii]
Loki_gp20	30.85	457	299	9	1	452	1	445	7e-53	209	gi|1055000295|ref|WP_066752844.1|	phage tail protein, partial [Cosenzaea myxofaciens]
Loki_gp20	32.04	465	292	11	1	459	1	447	7e-53	209	gi|763073010|ref|WP_043954492.1|;gi|757864926|gb|KIS43267.1|	tail protein [Kosakonia radicincitans]<>phage tail family protein [Kosakonia radicincitans YD4]
Loki_gp20	29.85	459	298	10	68	516	83	527	7e-53	205	gi|653034104|ref|WP_027285838.1|	hypothetical protein [Rubritepida flocculans]
Loki_gp20	31.53	406	259	11	59	459	56	447	1e-52	208	gi|692190739|ref|WP_032104564.1|;gi|1017261636|emb|SAB66831.1|;gi|1018058657|emb|SAD07361.1|;gi|1022051088|gb|KZQ94163.1|	MULTISPECIES: tail protein [Enterobacter cloacae complex]<>fibronectin type III domain-containing protein [Enterobacter cloacae]<>fibronectin type III domain-containing protein [Enterobacter cloacae]<>phage tail protein [Enterobacter hormaechei subsp. steigerwaltii]
Loki_gp21	100	262	0	0	1	262	1	262	0	528	gi|949419312|emb|CUS06482.1|	hypothetical protein [unclassified Siphoviridae]
Loki_gp21	84.81	158	24	0	3	160	2	159	2e-92	278	gi|589892161|ref|YP_009008526.1|;gi|583926715|gb|AHI60021.1|	hypothetical protein IME_AB3_22 [Acinetobacter phage IME_AB3]<>hypothetical protein IME_AB3_22 [Acinetobacter phage IME_AB3]
Loki_gp21	42.11	171	96	1	1	168	1	171	9e-28	120	gi|1084725592|gb|OGP69695.1|	hypothetical protein A2Y80_02205 [Deltaproteobacteria bacterium RBG_13_58_19]
Loki_gp21	47.1	138	70	2	1	135	1	138	4e-25	111	gi|780091462|ref|WP_045468463.1|;gi|723003681|dbj|BAP88835.1|	hypothetical protein [Burkholderiales bacterium GJ-E10]<>putative uncharacterized protein [Burkholderiales bacterium GJ-E10]
Loki_gp21	41.84	141	78	1	1	137	1	141	6e-24	110	gi|859440562|gb|KMP11526.1|	hypothetical protein UR09_03030 [Nitrospina sp. SCGC_AAA799_A02]
Loki_gp21	41.84	141	78	1	1	137	1	141	6e-24	110	gi|868616508|ref|WP_048493847.1|;gi|859439688|gb|KMP10750.1|	hypothetical protein [Nitrospina sp. SCGC_AAA799_C22]<>hypothetical protein UZ36_06645 [Nitrospina sp. SCGC_AAA799_C22]
Loki_gp21	41.91	136	76	1	4	136	3	138	1e-19	93.6	gi|499702188|ref|WP_011382922.1|;gi|82944418|dbj|BAE49282.1|	hypothetical protein [Magnetospirillum magneticum]<>hypothetical protein amb0478 [Magnetospirillum magneticum AMB-1]
Loki_gp21	40.24	164	35	3	162	262	1	164	1e-19	92.4	gi|589892160|ref|YP_009008525.1|;gi|583926714|gb|AHI60020.1|	hypothetical protein IME_AB3_21 [Acinetobacter phage IME_AB3]<>hypothetical protein IME_AB3_21 [Acinetobacter phage IME_AB3]
Loki_gp21	68.52	54	17	0	209	262	843	896	3e-13	79.7	gi|414090584|ref|YP_006990695.1|;gi|409188390|gb|AFV29139.1|	hypothetical protein IME11_90 [Escherichia phage IME11]<>hypothetical protein IME11_90 [Escherichia phage IME11]
Loki_gp21	81.4	43	8	0	220	262	256	298	4e-12	75.1	gi|818463440|gb|KKR19899.1|;gi|818794867|gb|KKU35032.1|	hypothetical protein UT51_C0013G0007 [Candidatus Nomurabacteria bacterium GW2011_GWC2_39_41]<>hypothetical protein UX48_C0020G0002 [Candidatus Azambacteria bacterium GW2011_GWB1_46_27]
Loki_gp21	73.91	46	12	0	217	262	581	626	6e-12	75.5	gi|1068511722|ref|YP_009275026.1|;gi|1003341953|gb|AMO43632.1|	hypothetical protein C171_00080 [Pseudomonas phage YMC11/06/C171_PPU_BP]<>hypothetical protein C171_00080 [Pseudomonas phage YMC11/06/C171_PPU_BP]
Loki_gp21	55.07	69	31	0	194	262	289	357	4e-11	72.4	gi|1086544680|emb|SDG33136.1|	Protein of unknown function [Sulfitobacter delicatus]
Loki_gp21	67.39	46	15	0	217	262	302	347	6e-11	72	gi|754846193|ref|WP_042207430.1|	hypothetical protein [Paenibacillus durus]
Loki_gp21	67.39	46	15	0	217	262	37	82	7e-11	66.6	gi|931423349|gb|KPK09546.1|	hypothetical protein AMS20_00035 [Gemmatimonas sp. SG8_28]
Loki_gp21	58.93	56	23	0	207	262	134	189	8e-11	69.3	gi|1039197706|gb|OBQ38759.1|	hypothetical protein AN484_23950 [Aphanizomenon flos-aquae WA102]
Loki_gp21	59.65	57	23	0	206	262	652	708	1e-10	71.6	gi|737532179|ref|WP_035505932.1|;gi|635344510|emb|CDQ26048.1|;gi|662983660|emb|CDQ22566.1|	MULTISPECIES: hypothetical protein [Halobacillus]<>hypothetical protein BN981_00259 [Halobacillus trueperi]<>hypothetical protein BN983_00779 [Halobacillus karajensis]
Loki_gp21	56.6	53	23	0	210	262	331	383	1e-10	71.2	gi|1133921361|ref|WP_076294662.1|;gi|1133250580|gb|OMF39757.1|	phage tail protein [Paenibacillus peoriae]<>phage tail protein [Paenibacillus peoriae]
Loki_gp21	56.6	53	23	0	210	262	314	366	2e-10	70.9	gi|1062530462|ref|WP_069292096.1|;gi|1061984015|gb|AOK93076.1|	phage tail protein [Paenibacillus polymyxa]<>phage tail protein [Paenibacillus polymyxa]
Loki_gp21	56.6	53	23	0	210	262	331	383	2e-10	70.5	gi|1057664303|ref|WP_068940077.1|;gi|1055227427|gb|ODA08732.1|	phage tail protein [Paenibacillus polymyxa]<>phage tail protein [Paenibacillus polymyxa]
Loki_gp21	74.42	43	11	0	220	262	167	209	7e-10	67.4	gi|1068359554|ref|YP_009277039.1|;gi|984262038|dbj|BAU40034.1|	putative tail fiber protein [Ralstonia phage RSP15]<>putative tail fiber protein [Ralstonia phage RSP15]
Loki_gp21	64.44	45	16	0	218	262	534	578	1e-09	68.6	gi|1085166978|gb|OGT56689.1|	hypothetical protein A3E01_00305 [Gammaproteobacteria bacterium RIFCSPHIGHO2_12_FULL_63_22]
Loki_gp21	41.13	141	76	3	1	135	1	140	2e-09	67.4	gi|504001337|ref|WP_014235331.1|;gi|359353458|gb|AEV24629.1|	hypothetical protein [Azospira oryzae]<>hypothetical protein Dsui_0209 [Dechlorosoma suillum PS]
Loki_gp21	53.57	56	26	0	207	262	430	485	2e-09	67.8	gi|1113435518|gb|OJW97492.1|	hypothetical protein BGO70_06810 [Bacteroidetes bacterium 43-93]
Loki_gp21	59.62	52	21	0	210	261	313	364	2e-09	67.4	gi|504412813|ref|WP_014599915.1|;gi|343097480|emb|CCC85689.1|	tail fiber protein [Paenibacillus polymyxa]<>putative tail fiber protein [Paenibacillus polymyxa M1]
Loki_gp21	59.62	52	21	0	210	261	330	381	3e-09	67	gi|1039671256|ref|WP_064962652.1|;gi|1036290034|gb|OAZ49088.1|	phage tail protein [Paenibacillus polymyxa]<>phage tail protein [Paenibacillus polymyxa]
Loki_gp21	59.62	52	21	0	210	261	330	381	4e-09	67	gi|515240268|ref|WP_016822028.1|	hypothetical protein [Paenibacillus polymyxa]
Loki_gp21	65.91	44	15	0	218	261	278	321	5e-09	66.2	gi|908695579|ref|WP_049827354.1|	hypothetical protein [Paenibacillus sp. 1-49]
Loki_gp21	42.71	96	42	1	180	262	368	463	6e-09	66.2	gi|1020097041|ref|WP_063232935.1|	hypothetical protein [Bacillus simplex]
Loki_gp21	64.58	48	17	0	215	262	494	541	7e-09	66.2	gi|1120210484|ref|WP_073077863.1|;gi|1110537381|emb|SHK92436.1|	hypothetical protein [Chitinophaga jiangningensis]<>hypothetical protein SAMN05444266_101605 [Chitinophaga jiangningensis]
Loki_gp21	41.1	73	43	0	190	262	654	726	1e-08	65.9	gi|919205441|ref|WP_052760942.1|	hypothetical protein [Bacillus cereus]
Loki_gp21	41.1	73	43	0	190	262	654	726	1e-08	65.9	gi|921063964|ref|WP_053077814.1|	hypothetical protein [Bacillus cereus]
Loki_gp21	41.1	73	43	0	190	262	654	726	1e-08	65.9	gi|1004352602|ref|WP_061529045.1|;gi|1003890734|gb|KXY83435.1|	hypothetical protein [Bacillus cereus]<>hypothetical protein AT272_05980 [Bacillus cereus]
Loki_gp21	41.1	73	43	0	190	262	654	726	1e-08	65.5	gi|1121252844|ref|WP_073569513.1|	hypothetical protein [Bacillus cereus]
Loki_gp21	61.7	47	18	0	215	261	769	815	6e-08	63.9	gi|497965718|ref|WP_010279874.1|	hypothetical protein [Paenibacillus senegalensis]
Loki_gp21	58.33	48	20	0	215	262	572	619	1e-07	63.2	gi|755164671|ref|WP_042513470.1|	hypothetical protein [Bacillus cereus]
Loki_gp21	58.33	48	20	0	215	262	558	605	1e-07	63.2	gi|753297477|gb|AJG61422.1|	hypothetical protein AW22_5301 [Bacillus cereus D17]
Loki_gp21	43.42	76	43	0	62	137	373	448	1e-07	62.8	gi|504001338|ref|WP_014235332.1|;gi|359353459|gb|AEV24630.1|	hypothetical protein [Azospira oryzae]<>hypothetical protein Dsui_0210 [Dechlorosoma suillum PS]
Loki_gp21	66.67	45	15	0	218	262	504	548	5e-07	60.8	gi|1057212018|ref|WP_068585184.1|;gi|1025857438|gb|OAB34487.1|;gi|1132047304|emb|SIQ84904.1|	hypothetical protein [Paenibacillus macquariensis]<>hypothetical protein PMSM_11500 [Paenibacillus macquariensis subsp. macquariensis]<>Pectate lyase superfamily protein [Paenibacillus macquariensis]
Loki_gp21	70.73	41	12	0	222	262	508	548	9e-07	60.1	gi|754764204|ref|WP_042128570.1|;gi|686525608|gb|AIQ36308.1|	hypothetical protein [Paenibacillus sp. FSL R5-0345]<>hypothetical protein R50345_17745 [Paenibacillus sp. FSL R5-0345]
Loki_gp21	70.73	41	12	0	222	262	508	548	1e-06	60.1	gi|1133735815|ref|WP_076118898.1|;gi|1133049318|gb|OMD41837.1|	hypothetical protein [Paenibacillus odorifer]<>hypothetical protein BSK52_10395 [Paenibacillus odorifer]
Loki_gp21	68.29	41	13	0	222	262	508	548	1e-06	59.7	gi|754826563|ref|WP_042189076.1|;gi|690623483|gb|AIQ24497.1|	hypothetical protein [Paenibacillus sp. FSL H7-0737]<>hypothetical protein H70737_17565 [Paenibacillus sp. FSL H7-0737]
Loki_gp21	65.12	43	15	0	220	262	312	354	2e-06	58.5	gi|1054123264|ref|WP_066161982.1|;gi|1005924214|gb|KYG91489.1|	hypothetical protein [Bacillus sp. KCTC 13219]<>hypothetical protein A0U40_00640 [Bacillus sp. KCTC 13219]
Loki_gp21	65.85	41	14	0	222	262	508	548	3e-06	58.5	gi|1133913211|ref|WP_076286735.1|;gi|1133174601|gb|OME64797.1|	hypothetical protein [Paenibacillus odorifer]<>hypothetical protein BSK65_27035 [Paenibacillus odorifer]
Loki_gp21	65.85	41	14	0	222	262	508	548	3e-06	58.5	gi|1133927815|ref|WP_076300884.1|;gi|1133053940|gb|OMD46353.1|	hypothetical protein [Paenibacillus odorifer]<>hypothetical protein BSK51_27375 [Paenibacillus odorifer]
Loki_gp21	58.14	43	18	0	220	262	565	607	9e-06	57	gi|1043492350|ref|WP_065383445.1|;gi|1043271452|gb|OBZ59162.1|;gi|1103869261|gb|OJE19668.1|	MULTISPECIES: hypothetical protein [Bacillus]<>hypothetical protein UN66_09415 [Bacillus cereus]<>hypothetical protein BAQ45_17010 [Bacillus sp. EB422]
Loki_gp21	67.5	40	13	0	223	262	509	548	1e-05	56.6	gi|983465391|ref|WP_060624199.1|;gi|962302424|gb|KTD85925.1|	hypothetical protein [Paenibacillus etheri]<>hypothetical protein UQ64_17680 [Paenibacillus etheri]
Loki_gp21	63.64	44	15	1	220	262	665	708	2e-05	56.2	gi|1093970753|ref|WP_070969816.1|;gi|1092230324|gb|AOY88662.1|	hypothetical protein [Marinobacter sp. Hb8]<>hypothetical protein BKP64_11030 [Marinobacter sp. Hb8]
Loki_gp21	58.7	46	18	1	217	261	338	383	2e-05	55.8	gi|1039670865|ref|WP_064962261.1|;gi|1036290729|gb|OAZ49763.1|	phage tail protein [Paenibacillus polymyxa]<>phage tail protein [Paenibacillus polymyxa]
Loki_gp21	63.41	41	15	0	222	262	508	548	4e-05	55.1	gi|1133836564|ref|WP_076214696.1|;gi|1133130441|gb|OME21462.1|	hypothetical protein [Paenibacillus odorifer]<>hypothetical protein BSK57_20205 [Paenibacillus odorifer]
Loki_gp21	63.41	41	15	0	222	262	508	548	4e-05	55.1	gi|1133932532|ref|WP_076305401.1|;gi|1133071661|gb|OMD63742.1|	hypothetical protein [Paenibacillus odorifer]<>hypothetical protein BSK48_26170 [Paenibacillus odorifer]
Loki_gp21	63.41	41	15	0	222	262	508	548	4e-05	55.1	gi|1133842100|ref|WP_076219537.1|;gi|1133034395|gb|OMD27394.1|	hypothetical protein [Paenibacillus odorifer]<>hypothetical protein BSO21_20120 [Paenibacillus odorifer]
Loki_gp21	55.32	47	21	0	213	259	651	697	4e-05	55.1	gi|944827626|gb|KQO78110.1|	hypothetical protein ASF36_13830 [Methylobacterium sp. Leaf90]
Loki_gp21	31.91	141	83	4	1	138	1	131	4e-05	54.3	gi|780536578|ref|WP_045582238.1|;gi|778297779|gb|KJR66951.1|;gi|933521327|gb|ALG71646.1|	hypothetical protein [Azospirillum thiophilum]<>hypothetical protein VY88_13990 [Azospirillum thiophilum]<>hypothetical protein AL072_12750 [Azospirillum thiophilum]
Loki_gp21	63.41	41	15	0	222	262	508	548	4e-05	55.1	gi|1133903998|ref|WP_076277767.1|;gi|1133091406|gb|OMD83148.1|	hypothetical protein [Paenibacillus odorifer]<>hypothetical protein BSK49_24710 [Paenibacillus odorifer]
Loki_gp21	55.32	47	21	0	213	259	625	671	5e-05	55.1	gi|947802719|ref|WP_056464234.1|	hypothetical protein [Methylobacterium sp. Leaf90]
Loki_gp21	46	50	27	0	212	261	326	375	6e-05	54.3	gi|501031406|ref|WP_012083485.1|;gi|151425172|dbj|BAF72675.1|	hypothetical protein [Sulfurovum sp. NBC37-1]<>hypothetical protein SUN_1728 [Sulfurovum sp. NBC37-1]
Loki_gp21	48.94	47	24	0	215	261	321	367	0.0001	53.1	gi|518516476|ref|WP_019686683.1|	hypothetical protein [Paenibacillus polymyxa]
Loki_gp21	60.98	41	16	0	222	262	508	548	0.0002	53.1	gi|1133747066|ref|WP_076129742.1|;gi|1133081181|gb|OMD73090.1|	hypothetical protein [Paenibacillus odorifer]<>hypothetical protein BSK50_23265 [Paenibacillus odorifer]
Loki_gp21	60.98	41	16	0	222	262	508	548	0.0002	53.1	gi|1133906559|ref|WP_076280225.1|;gi|1133105438|gb|OMD96933.1|	hypothetical protein [Paenibacillus odorifer]<>hypothetical protein BSK54_24650 [Paenibacillus odorifer]
Loki_gp21	60.98	41	16	0	222	262	508	548	0.0002	53.1	gi|1133714037|ref|WP_076098958.1|;gi|1133023045|gb|OMD16421.1|	hypothetical protein [Paenibacillus odorifer]<>hypothetical protein BJP47_20635 [Paenibacillus odorifer]
Loki_gp21	60.98	41	16	0	222	262	508	548	0.0002	53.1	gi|740786485|ref|WP_038571769.1|;gi|686564242|gb|AIQ74935.1|	hypothetical protein [Paenibacillus odorifer]<>hypothetical protein PODO_17665 [Paenibacillus odorifer]
Loki_gp21	60.98	41	16	0	222	262	508	548	0.0002	53.1	gi|1133937193|ref|WP_076309747.1|;gi|1132984307|gb|OMC78838.1|	hypothetical protein [Paenibacillus odorifer]<>hypothetical protein BK125_08255 [Paenibacillus odorifer]
Loki_gp21	60.98	41	16	0	222	262	508	548	0.0002	53.1	gi|1133900860|ref|WP_076274772.1|;gi|1133033280|gb|OMD26315.1|	hypothetical protein [Paenibacillus odorifer]<>hypothetical protein BJP48_23110 [Paenibacillus odorifer]
Loki_gp21	60.98	41	16	0	222	262	508	548	0.0002	53.1	gi|738797089|ref|WP_036688232.1|;gi|573546927|gb|ETT45792.1|;gi|1133011314|gb|OMD05064.1|;gi|1133037439|gb|OMD30388.1|;gi|1133138649|gb|OME29509.1|;gi|1133144301|gb|OME35043.1|;gi|1133161721|gb|OME52088.1|;gi|1133163543|gb|OME53893.1|	MULTISPECIES: hypothetical protein [Paenibacillus]<>hypothetical protein C171_29169 [Paenibacillus sp. FSL H8-237]<>hypothetical protein BJP49_21480 [Paenibacillus odorifer]<>hypothetical protein BJP51_20220 [Paenibacillus odorifer]<>hypothetical protein BSK63_21180 [Paenibacillus odorifer]<>hypothetical protein BSK46_19755 [Paenibacillus odorifer]<>hypothetical protein BSK59_19425 [Paenibacillus…
Loki_gp21	60.98	41	16	0	222	262	508	548	0.0002	53.1	gi|1133751504|ref|WP_076133876.1|;gi|1133132232|gb|OME23223.1|	hypothetical protein [Paenibacillus odorifer]<>hypothetical protein BSK47_05895 [Paenibacillus odorifer]
Loki_gp21	60.98	41	16	0	222	262	508	548	0.0002	53.1	gi|1133802800|ref|WP_076182389.1|;gi|1133069422|gb|OMD61524.1|;gi|1133084226|gb|OMD76069.1|	hypothetical protein [Paenibacillus odorifer]<>hypothetical protein BSK55_02815 [Paenibacillus odorifer]<>hypothetical protein BSK53_27990 [Paenibacillus odorifer]
Loki_gp21	60.98	41	16	0	222	262	508	548	0.0002	53.1	gi|1133849449|ref|WP_076225194.1|;gi|1133141492|gb|OME32266.1|;gi|1133161287|gb|OME51659.1|	hypothetical protein [Paenibacillus odorifer]<>hypothetical protein BSK58_28400 [Paenibacillus odorifer]<>hypothetical protein BSK61_20075 [Paenibacillus odorifer]
Loki_gp21	60.98	41	16	0	222	262	508	548	0.0002	53.1	gi|1133936415|ref|WP_076309064.1|;gi|1133097447|gb|OMD89095.1|	hypothetical protein [Paenibacillus odorifer]<>hypothetical protein BSK67_25715 [Paenibacillus odorifer]
Loki_gp21	60.98	41	16	0	222	262	508	548	0.0002	53.1	gi|1133822160|ref|WP_076200660.1|;gi|1133127409|gb|OME18483.1|	hypothetical protein [Paenibacillus odorifer]<>hypothetical protein BSK60_00070 [Paenibacillus odorifer]
Loki_gp21	60.98	41	16	0	222	262	508	548	0.0002	53.1	gi|1133930337|ref|WP_076303325.1|;gi|1133067446|gb|OMD59570.1|	hypothetical protein [Paenibacillus odorifer]<>hypothetical protein BSK62_26845 [Paenibacillus odorifer]
Loki_gp21	60.98	41	16	0	222	262	508	548	0.0002	53.1	gi|1133898631|ref|WP_076272687.1|;gi|1133021336|gb|OMD14733.1|	hypothetical protein [Paenibacillus odorifer]<>hypothetical protein BJP50_20385 [Paenibacillus odorifer]
Loki_gp21	60.98	41	16	0	222	262	508	548	0.0002	53.1	gi|1133933397|ref|WP_076306136.1|;gi|1133116710|gb|OME07975.1|	hypothetical protein [Paenibacillus odorifer]<>hypothetical protein BSK64_06915 [Paenibacillus odorifer]
Loki_gp21	45.95	74	40	0	62	135	3	76	0.0002	52	gi|946858475|ref|WP_055781487.1|;gi|945139689|gb|KQS01965.1|	hypothetical protein [Sphingomonas sp. Leaf357]<>hypothetical protein ASG11_14210 [Sphingomonas sp. Leaf357]
Loki_gp21	46.48	71	35	3	192	260	626	695	0.0004	52	gi|494482058|ref|WP_007271533.1|;gi|470217519|gb|EMQ98335.1|	hypothetical protein [Paeniglutamicibacter gangotriensis]<>hypothetical protein ADIAG_02353 [Paeniglutamicibacter gangotriensis Lz1y]
Loki_gp21	58.54	41	17	0	222	262	508	548	0.0006	51.6	gi|1133721795|ref|WP_076106235.1|;gi|1133001087|gb|OMC95161.1|	hypothetical protein [Paenibacillus odorifer]<>hypothetical protein BJP46_06160 [Paenibacillus odorifer]
Loki_gp21	43.06	72	41	0	189	260	497	568	0.0007	51.6	gi|1132142355|ref|WP_075830069.1|;gi|1131056929|gb|OLV20112.1|	hypothetical protein [Deinococcus marmoris]<>hypothetical protein BOO71_0000364 [Deinococcus marmoris]
Loki_gp21	58.54	41	17	0	222	262	508	548	0.0007	51.2	gi|1133908102|ref|WP_076281652.1|;gi|1132975067|gb|OMC69734.1|	hypothetical protein [Paenibacillus odorifer]<>hypothetical protein BK121_14000 [Paenibacillus odorifer]
Loki_gp21	44.26	61	33	1	70	130	183	242	0.0008	51.2	gi|493663934|ref|WP_006615198.1|;gi|365269628|emb|CCD89858.1|	hypothetical protein [Bradyrhizobium sp. ORS 285]<>hypothetical protein BRAO285_850063 [Bradyrhizobium sp. ORS 285]
Loki_gp21	50.98	51	21	1	212	262	754	800	0.002	50.4	gi|446054464|ref|WP_000132319.1|;gi|387616302|ref|YP_006119324.1|;gi|312945563|gb|ADR26390.1|	phage head protein [Escherichia coli]<>Endo-alpha-sialidase, phage head protein [Escherichia coli O83:H1 str. NRG 857C]<>Endo-alpha-sialidase, phage head protein [Escherichia coli O83:H1 str. NRG 857C]
Loki_gp21	50.98	51	21	1	212	262	754	800	0.002	50.4	gi|723117873|ref|WP_033561328.1|	phage head protein [Escherichia coli]
Loki_gp21	31.71	164	70	8	122	261	617	762	0.002	50.4	gi|947797011|ref|WP_056458578.1|;gi|944840563|gb|KQO90914.1|	hypothetical protein [Methylobacterium sp. Leaf90]<>hypothetical protein ASF36_22050 [Methylobacterium sp. Leaf90]
Loki_gp21	50.98	51	21	1	212	262	753	799	0.002	50.4	gi|446052061|ref|WP_000129916.1|;gi|222032756|emb|CAP75495.1|	phage head protein [Escherichia coli]<>hypothetical protein LF82_140 [Escherichia coli LF82]
Loki_gp21	50.98	51	21	1	212	262	812	858	0.002	50.1	gi|918362902|ref|WP_052415178.1|	phage head protein [Escherichia coli]
Loki_gp21	49.02	51	22	1	212	262	753	799	0.002	49.7	gi|658505273|ref|WP_029701265.1|;gi|575644461|gb|ETY43144.1|;gi|960783034|gb|KSY71385.1|	phage head protein [Escherichia coli]<>bifunctional tail protein [Escherichia coli BWH 40]<>phage head protein [Escherichia coli]
Loki_gp21	49.02	51	22	1	212	262	753	799	0.002	49.7	gi|510921681|ref|WP_016242485.1|;gi|508417747|gb|EOV88094.1|;gi|508422145|gb|EOV92426.1|;gi|508422918|gb|EOV93194.1|;gi|508425868|gb|EOV96098.1|	bifunctional tail protein [Escherichia sp. KTE96]<>bifunctional tail protein [Escherichia sp. KTE96]<>bifunctional tail protein [Escherichia sp. KTE96]<>bifunctional tail protein [Escherichia sp. KTE96]<>bifunctional tail protein [Escherichia sp. KTE96]
Loki_gp21	49.02	51	22	1	212	262	754	800	0.002	49.7	gi|979476847|ref|WP_059331141.1|;gi|975732699|gb|KUX25789.1|	phage head protein [Escherichia coli]<>phage head protein [Escherichia coli]
Loki_gp21	57.14	42	15	1	218	259	111	149	0.003	47.4	gi|971862607|ref|WP_058931499.1|;gi|971342198|gb|ALV42382.1|	hypothetical protein [Pseudarthrobacter sulfonivorans]<>hypothetical protein AU252_15520 [Pseudarthrobacter sulfonivorans]
Loki_gp21	52.17	46	19	1	215	260	134	176	0.004	48.9	gi|1083938132|gb|OGJ55057.1|;gi|1083943333|gb|OGJ59975.1|	hypothetical protein A2880_03865 [Candidatus Peribacteria bacterium RIFCSPHIGHO2_01_FULL_49_38]<>hypothetical protein A3D11_02405 [Candidatus Peribacteria bacterium RIFCSPHIGHO2_02_FULL_49_16]
Loki_gp21	49.02	51	25	1	213	262	642	692	0.006	48.5	gi|535632415|gb|EQX68923.1|	bifunctional tail protein [Escherichia coli UMEA 3185-1]
Loki_gp21	50	50	24	1	212	260	396	445	0.006	48.5	gi|1098638784|ref|WP_071254070.1|;gi|1096959420|gb|OII27565.1|	hypothetical protein [Frigoribacterium sp. MCBA15_019]<>hypothetical protein BIV04_03250 [Frigoribacterium sp. MCBA15_019]
Loki_gp21	49.02	51	25	1	213	262	642	692	0.007	48.5	gi|895964673|ref|WP_049044621.1|	hypothetical protein [Escherichia coli]
Loki_gp21	49.02	51	25	1	213	262	642	692	0.007	48.5	gi|838804613|gb|KLX86916.1|;gi|838817038|gb|KLX99228.1|;gi|967391323|gb|KTK62731.1|	bifunctional tail protein [Escherichia coli]<>bifunctional tail protein [Escherichia coli]<>hypothetical protein AL500_07405 [Escherichia coli]
Loki_gp21	49.02	51	25	1	213	262	643	693	0.007	48.1	gi|636875675|gb|KDN08615.1|;gi|960740159|gb|KSY29969.1|	Phage tail fiber [Escherichia coli]<>hypothetical protein APU01_05905 [Escherichia coli]
Loki_gp21	42.55	47	27	0	215	261	624	670	0.008	48.1	gi|817718755|ref|WP_046672065.1|;gi|817567479|gb|KKO92846.1|	hypothetical protein [Sphingobacterium sp. Ag1]<>hypothetical protein AAW12_02630 [Sphingobacterium sp. Ag1]
Loki_gp21	45.9	61	27	2	203	262	174	229	0.01	46.6	gi|1122808463|ref|WP_074162017.1|	hypothetical protein [Escherichia coli]
Loki_gp21	33	100	61	3	44	138	69	167	0.04	45.8	gi|1072315710|ref|WP_069937797.1|;gi|1072047373|gb|OES45800.1|	hypothetical protein [Domibacillus iocasae]<>hypothetical protein BA724_03065 [Domibacillus iocasae]
Loki_gp21	48.84	43	22	0	217	259	118	160	0.05	45.1	gi|1103283330|ref|WP_071644836.1|;gi|1102512701|gb|OIU84608.1|	hypothetical protein [Microbacterium sp. AR7-10]<>hypothetical protein BFN01_02135 [Microbacterium sp. AR7-10]
Loki_gp21	47.62	42	22	0	218	259	53	94	0.08	44.3	gi|896631748|ref|WP_049512685.1|	hypothetical protein [Streptococcus pseudopneumoniae]
Loki_gp21	47.62	42	22	0	218	259	804	845	0.08	45.1	gi|1134131644|ref|WP_076374639.1|;gi|1031983250|dbj|BAV08651.1|;gi|1132079363|emb|SIS59276.1|	hypothetical protein [Filimonas lacunae]<>hypothetical protein FLA_4698 [Filimonas lacunae]<>hypothetical protein SAMN05421788_101111 [Filimonas lacunae]
Loki_gp21	52.5	40	19	0	220	259	50	89	0.09	43.9	gi|896609870|ref|WP_049492703.1|	hypothetical protein [Streptococcus pseudopneumoniae]
Loki_gp22	100	651	0	0	1	651	1	651	0	1351	gi|949419313|emb|CUS06483.1|	putative DNA polymerase [unclassified Siphoviridae]
Loki_gp22	80.21	652	126	1	1	649	1	652	0	1098	gi|589892159|ref|YP_009008524.1|;gi|583926713|gb|AHI60019.1|	putative DNA polymerase subunit [Acinetobacter phage IME_AB3]<>putative DNA polymerase subunit [Acinetobacter phage IME_AB3]
Loki_gp22	55.99	684	266	6	3	651	2	685	0	713	gi|971821781|ref|YP_009220363.1|;gi|827196361|gb|AKJ71387.1|	DNA polymerase subunit [Achromobacter phage phiAxp-1]<>DNA polymerase subunit [Achromobacter phage phiAxp-1]
Loki_gp22	47.39	614	299	7	54	647	11	620	0	554	gi|916776386|ref|WP_051383442.1|	hypothetical protein [Bradyrhizobium sp. WSM3983]
Loki_gp22	48.76	603	291	6	52	647	68	659	0	553	gi|971742371|ref|YP_009196826.1|;gi|768214074|gb|AJT60517.1|	DNA polymerase B [Escherichia phage CAjan]<>DNA polymerase B [Escherichia phage CAjan]
Loki_gp22	48.76	603	291	6	52	647	68	659	0	552	gi|849060501|ref|YP_009151974.1|;gi|701946801|gb|AIW03893.1|	DNA polymerase [Escherichia phage Seurat]<>DNA polymerase [Escherichia phage Seurat]
Loki_gp22	48.59	603	292	6	52	647	68	659	0	550	gi|1049308779|gb|ANY29826.1|	DNA polymerase B region protein [Escherichia phage Greed]
Loki_gp22	48.26	603	294	6	52	647	68	659	0	546	gi|971747760|ref|YP_009201615.1|;gi|936910495|emb|CUL01110.1|	DNA polymerase elongation subunit 1 [Enterobacteria phage 9g] [Escherichia phage slur01]<>DNA polymerase elongation subunit 1 [Enterobacteria phage 9g] [Escherichia phage slur01]
Loki_gp22	45.4	685	290	10	35	647	49	721	0	544	gi|1070101663|ref|YP_009285843.1|;gi|1026924176|gb|AND74882.1|	DNA polymerase B region [Pseudomonas phage NP1]<>DNA polymerase B region [Pseudomonas phage NP1]
Loki_gp22	43.66	678	349	9	3	651	1	674	0	544	gi|823081435|gb|AKI28790.1|	DNA polymerase [Stenotrophomonas phage vB_SmaS-DLP_1]
Loki_gp22	45.4	685	290	10	35	647	49	721	0	543	gi|936761749|gb|ALH23797.1|	putative DNA polymerase [Pseudomonas phage PaMx25]
Loki_gp22	43.66	678	349	9	3	651	1	674	0	542	gi|148912854|ref|YP_001293433.1|	hypothetical protein ORF026 [Pseudomonas phage 73]
Loki_gp22	43.66	678	349	9	3	651	1	674	1e-180	537	gi|658311484|ref|YP_009044361.1|;gi|656178026|emb|CDN96787.1|	DNA polymerase [Pseudomonas phage vB_PaeS_SCH_Ab26]<>DNA polymerase [Pseudomonas phage vB_PaeS_SCH_Ab26]
Loki_gp22	43.66	678	349	9	3	651	1	674	2e-180	536	gi|971766227|ref|YP_009219184.1|;gi|823081376|gb|AKI28732.1|	DNA polymerase [Stenotrophomonas phage vB_SmaS-DLP_2]<>DNA polymerase [Stenotrophomonas phage vB_SmaS-DLP_2]
Loki_gp22	43.51	678	350	9	3	651	1	674	3e-180	536	gi|701904489|gb|AIW01690.1|	DNA polymerase I [Pseudomonas phage vB_Pae_PS9N]
Loki_gp22	43.51	678	350	9	3	651	1	674	5e-180	536	gi|388542686|ref|YP_006299891.1|;gi|378407754|gb|AFB83315.1|	DNA polymerase [Pseudomonas phage vB_Pae-Kakheti25]<>DNA polymerase [Pseudomonas phage vB_Pae-Kakheti25]
Loki_gp22	48.05	614	287	9	52	647	15	614	1e-179	532	gi|552541511|ref|WP_022999976.1|;gi|550670084|gb|ERP95652.1|;gi|550681319|gb|ERS05718.1|	MULTISPECIES: hypothetical protein [Labrenzia]<>hypothetical protein Q669_29710 [Labrenzia sp. C1B10]<>hypothetical protein Q675_29275 [Labrenzia sp. C1B70]
Loki_gp22	43.07	685	350	10	3	651	1	681	7e-178	530	gi|399528738|ref|YP_006560778.1|;gi|371767574|gb|AEX56108.1|	DNA polymerase [Burkholderia phage KL1]<>DNA polymerase [Burkholderia phage KL1]
Loki_gp22	44.14	657	314	10	34	651	29	671	9e-178	530	gi|985760172|ref|YP_009225693.1|;gi|910307329|gb|AKU43045.1|	DNA polymerase [Rhodobacter phage RcTitan]<>DNA polymerase [Rhodobacter phage RcTitan]
Loki_gp22	43.99	657	315	10	34	651	29	671	9e-176	525	gi|910307512|gb|AKU43211.1|	DNA polymerase [Rhodobacter phage RcSpartan]
Loki_gp22	42.04	685	357	10	3	651	1	681	2e-173	519	gi|971751677|ref|YP_009205622.1|;gi|936761515|gb|ALH23574.1|	putative DNA polymerase [Pseudomonas phage PaMx42]<>putative DNA polymerase [Pseudomonas phage PaMx42]
Loki_gp22	43.2	669	295	10	54	648	9	666	1e-166	501	gi|917547763|ref|WP_052150997.1|;gi|956645123|gb|KSK95802.1|	hypothetical protein [Pseudomonas aeruginosa]<>hypothetical protein APA35_13375 [Pseudomonas aeruginosa]
Loki_gp22	43.13	670	295	10	54	648	9	667	1e-166	501	gi|553780444|ref|WP_023112070.1|;gi|552329084|gb|ERV88410.1|;gi|943860876|gb|KQJ77021.1|	hypothetical protein [Pseudomonas aeruginosa]<>hypothetical protein Q039_03759 [Pseudomonas aeruginosa BWHPSA026]<>hypothetical protein AN446_15300 [Pseudomonas aeruginosa]
Loki_gp22	43.05	669	296	9	54	648	9	666	2e-166	500	gi|1123535777|ref|WP_074247600.1|	hypothetical protein [Pseudomonas aeruginosa]
Loki_gp22	43.05	669	296	10	54	648	9	666	6e-166	499	gi|909707846|ref|WP_049951044.1|;gi|618769279|gb|KAJ06549.1|	hypothetical protein [Pseudomonas aeruginosa]<>hypothetical protein M003_21565 [Pseudomonas aeruginosa IGB83]
Loki_gp22	48.5	567	260	8	39	578	52	613	1e-164	498	gi|1041568374|gb|ANO57495.1|	hypothetical protein [Vibrio phage vB_VhaS-tm]
Loki_gp22	45.45	66	33	1	585	647	685	750	7e-07	63.5	gi|1041568374|gb|ANO57495.1|	hypothetical protein [Vibrio phage vB_VhaS-tm]
Loki_gp22	41.55	633	329	5	49	651	45	666	7e-164	494	gi|1015669870|gb|AMW36143.1|	DNA polymerase [Xanthomonas phage XAJ2]
Loki_gp22	42.83	607	333	5	42	647	61	654	6e-158	478	gi|640885074|ref|YP_009032324.1|;gi|601131686|gb|AHN84517.1|	DNA polymerase elongation subunit 1 [Enterobacteria phage 9g]<>DNA polymerase elongation subunit 1 [Enterobacteria phage 9g]
Loki_gp22	42.67	607	334	5	42	647	61	654	6e-158	478	gi|971763998|ref|YP_009216968.1|;gi|797192539|gb|AKA60983.1|	DNA polymerase B region [Enterobacteria phage JenP2]<>DNA polymerase B region [Enterobacteria phage JenP2]
Loki_gp22	42.67	607	334	5	42	647	61	654	8e-158	478	gi|971766402|ref|YP_009219309.1|;gi|797192637|gb|AKA61069.1|	DNA polymerase B region [Enterobacteria phage JenK1]<>DNA polymerase B region [Enterobacteria phage JenK1]
Loki_gp22	42.67	607	334	5	42	647	61	654	1e-157	477	gi|971767097|ref|YP_009220000.1|;gi|797192440|gb|AKA60896.1|	DNA polymerase B region [Enterobacteria phage JenP1]<>DNA polymerase B region [Enterobacteria phage JenP1]
Loki_gp22	41.98	636	333	8	46	647	2	635	8e-154	467	gi|472341395|ref|YP_007674913.1|;gi|468641427|gb|AGH31453.1|	DNA polymerase [Loktanella phage pCB2051-A]<>DNA polymerase [Loktanella phage pCB2051-A]
Loki_gp22	46.94	539	261	7	54	578	9	536	3e-151	461	gi|971500137|gb|ALV77346.1|	hypothetical protein AOY09_02287 [Pseudomonas aeruginosa]
Loki_gp22	47.3	74	34	1	580	648	594	667	3e-08	68.2	gi|971500137|gb|ALV77346.1|	hypothetical protein AOY09_02287 [Pseudomonas aeruginosa]
Loki_gp22	41.67	624	333	5	45	648	3	615	1e-148	455	gi|399529112|ref|YP_006561157.1|;gi|373429457|gb|AEY69583.1|	DNA polymerase [Burkholderia phage AH2]<>DNA polymerase [Burkholderia phage AH2]
Loki_gp22	40.54	629	337	10	43	645	57	674	1e-147	452	gi|848469530|ref|YP_009145906.1|;gi|441463453|gb|AGC35732.1|;gi|441463530|gb|AGC35808.1|;gi|441463612|gb|AGC35889.1|	putative DNA polymerase protein [Rhizobium phage RHEph06]<>putative DNA polymerase protein [Rhizobium phage RHEph04]<>putative DNA polymerase protein [Rhizobium phage RHEph05]<>putative DNA polymerase protein [Rhizobium phage RHEph06]
Loki_gp22	40.22	649	365	8	18	647	36	680	9e-147	450	gi|146329938|ref|YP_001210246.1|;gi|145321114|gb|ABP63597.1|	BcepGomrgp26 [Burkholderia phage BcepGomr]<>BcepGomrgp26 [Burkholderia phage BcepGomr]
Loki_gp22	48.96	482	233	4	13	493	31	500	3e-144	437	gi|1088491744|gb|OHD22916.1|	hypothetical protein A2Y38_19835, partial [Spirochaetes bacterium GWB1_59_5]
Loki_gp22	40.52	617	342	9	54	647	13	627	6e-135	420	gi|985770106|ref|YP_009226425.1|;gi|921956008|gb|ALA45463.1|	DNA polymerase [Achromobacter phage phiAxp-2]<>DNA polymerase [Achromobacter phage phiAxp-2]
Loki_gp22	45.77	461	238	3	51	510	4	453	7e-134	409	gi|589621342|gb|EXI92403.1|	DNA polymerase I [Candidatus Accumulibacter sp. BA-94]
Loki_gp22	46.72	458	220	7	124	561	12	465	2e-125	390	gi|951480034|ref|WP_057851356.1|;gi|949347729|gb|KRR06154.1|	hypothetical protein, partial [Bradyrhizobium valentinum]<>hypothetical protein CP49_37655, partial [Bradyrhizobium valentinum]
Loki_gp22	38.29	645	337	16	50	649	2	630	3e-124	391	gi|640178806|ref|WP_024812758.1|	hypothetical protein [Oceanicola sp. HL-35]
Loki_gp22	36.87	670	343	13	55	648	26	691	7e-117	373	gi|48697545|ref|YP_024903.1|;gi|47717515|gb|AAT37761.1|	gp69 [Burkholderia phage BcepB1A]<>gp69 [Burkholderia phage BcepB1A]
Loki_gp22	37.03	632	351	14	45	647	5	618	4e-110	354	gi|1067241455|gb|OED34614.1|	hypothetical protein AB832_07250 [Flavobacteriaceae bacterium (ex Bugula neritina AB1)]
Loki_gp22	34.86	657	366	15	51	647	9	663	6e-108	350	gi|1070093340|ref|WP_069707924.1|;gi|1069772746|gb|AOR76513.1|	hypothetical protein [Novosphingobium resinovorum]<>hypothetical protein BES08_06980 [Novosphingobium resinovorum]
Loki_gp22	34.86	654	369	15	50	649	2	652	3e-105	343	gi|1086977235|emb|SDJ24455.1|	hypothetical protein SAMN05428983_0798 [Rhizobium sp. PDC82]
Loki_gp22	34.25	654	373	13	50	649	2	652	1e-103	339	gi|493357607|ref|WP_006314138.1|;gi|333792191|gb|EGL63561.1|	hypothetical protein [Agrobacterium sp. ATCC 31749]<>hypothetical protein AGRO_3630 [Agrobacterium sp. ATCC 31749]
Loki_gp22	33.94	654	375	13	50	649	2	652	3e-103	337	gi|737279904|ref|WP_035263321.1|;gi|648204928|gb|KDR88276.1|;gi|978147767|gb|KVK49539.1|;gi|978148006|gb|KVK49776.1|;gi|978161126|gb|KVK62717.1|;gi|978163528|gb|KVK65102.1|;gi|978165616|gb|KVK67168.1|	MULTISPECIES: hypothetical protein [Agrobacterium]<>hypothetical protein K538_12715 [Agrobacterium tumefaciens GW4]<>hypothetical protein L903_19680 [Agrobacterium sp. JL28]<>hypothetical protein L904_19670 [Agrobacterium sp. LY4]<>hypothetical protein L906_18795 [Agrobacterium sp. TS45]<>hypothetical protein L905_19320 [Agrobacterium sp. TS43]<>hypothetical protein L907_18775 [Agrobacterium sp. …
Loki_gp22	33.78	675	368	16	54	651	16	688	7e-100	329	gi|1046626241|ref|WP_065695177.1|;gi|1046115951|gb|OCJ32164.1|	hypothetical protein [Agrobacterium tumefaciens]<>hypothetical protein A6U90_09615 [Agrobacterium tumefaciens]
Loki_gp22	34.04	658	364	14	54	647	17	668	4e-99	327	gi|503610349|ref|WP_013844425.1|;gi|334095173|gb|AEG53184.1|;gi|1095180754|emb|SEI56728.1|	DNA-directed DNA polymerase B [Sinorhizobium meliloti]<>DNA-directed DNA polymerase B [Sinorhizobium meliloti AK83]<>hypothetical protein SAMN04244575_01088 [Sinorhizobium meliloti]
Loki_gp22	34.11	683	363	15	50	648	2	681	2e-93	313	gi|557832149|ref|WP_023456952.1|;gi|557345846|gb|ESQ85445.1|	hypothetical protein [Asticcacaulis sp. AC466]<>hypothetical protein AEAC466_04580 [Asticcacaulis sp. AC466]
Loki_gp22	33.23	656	359	17	48	646	2	635	3e-89	300	gi|1067241309|gb|OED34474.1|	hypothetical protein AB832_07600 [Flavobacteriaceae bacterium (ex Bugula neritina AB1)]
Loki_gp22	28.69	610	382	13	52	637	109	689	1e-60	224	gi|783327006|gb|KJU84696.1|	DNA-directed DNA polymerase [Candidatus Magnetobacterium bavaricum]
Loki_gp22	35.09	399	220	9	50	434	10	383	2e-60	216	gi|1097861508|emb|SEH67372.1|	[similarity to] phage DNA polymerase [methanotrophic bacterial endosymbiont of Bathymodiolus sp.]
Loki_gp22	29.79	423	261	10	166	574	129	529	2e-53	203	gi|1131741186|gb|APU92818.1|;gi|1131741278|gb|APU92909.1|	putative DNA polymerase [Salmonella phage vB_SenS_Sasha]<>putative DNA polymerase [Salmonella phage vB_SenS_Sergei]
Loki_gp22	29	431	262	10	166	574	129	537	2e-51	197	gi|451939166|gb|AGF89344.1|;gi|451939400|gb|AGF89563.1|	DNA polymerase [Salmonella phage FSL SP-062]<>DNA polymerase [Salmonella phage SP069]
Loki_gp22	49.27	205	93	2	372	576	1	194	4e-49	179	gi|822104379|gb|KLD61802.1|	hypothetical protein Y883_21265, partial [Luteibacter rhizovicinus DSM 16549]
Loki_gp22	26.3	635	396	22	54	642	6	614	3e-47	186	gi|1133700723|ref|WP_076086334.1|;gi|1133384098|gb|APW65643.1|	hypothetical protein [Arcobacter sp. LPB0137]<>hypothetical protein LPB137_07155 [Arcobacter sp. LPB0137]
Loki_gp22	28.67	558	348	14	54	578	8	548	1e-44	179	gi|712914021|ref|YP_009101235.1|;gi|645494992|gb|AIB07068.1|	putative DNA polymerase [Salmonella phage 9NA]<>putative DNA polymerase [Salmonella phage 9NA]
Loki_gp22	27.5	560	344	17	53	579	20	550	2e-44	179	gi|712915963|ref|YP_009103744.1|;gi|587758034|gb|AHK11762.1|	PolB elongation subunit [Shewanella sp. phage 1/44]<>PolB elongation subunit [Shewanella sp. phage 1/44]
Loki_gp22	26.04	603	382	16	54	614	6	586	5e-44	177	gi|1103221313|ref|WP_071628147.1|	hypothetical protein [Epsilonproteobacteria bacterium LFT 1.7]
Loki_gp22	28.07	570	335	18	53	568	48	596	5e-44	179	gi|418489190|ref|YP_007003043.1|;gi|378565113|gb|AFC22385.1|;gi|636576065|gb|AIA08692.1|	putative DNA polymerase [Vibrio phage CP-T1]<>putative DNA polymerase [Vibrio phage CP-T1]<>putative DNA polymerase [Vibrio phage 24]
Loki_gp22	25.79	601	376	19	54	625	47	606	2e-43	176	gi|448261073|ref|YP_007348961.1|;gi|427197507|dbj|BAM68869.1|	putative DNA polymerase [Edwardsiella phage MSW-3]<>putative DNA polymerase [Edwardsiella phage MSW-3]
Loki_gp22	27.72	570	337	18	53	568	57	605	8e-43	175	gi|422936542|ref|YP_007006391.1|;gi|378565413|gb|AFC22681.1|	putative DNA polymerase [Vibrio phage vB_VchM-138]<>putative DNA polymerase [Vibrio phage vB_VchM-138]
Loki_gp22	26	550	347	17	54	574	47	565	2e-42	174	gi|610583964|ref|YP_008869267.1|;gi|482840782|dbj|BAN16864.1|	hypothetical protein [Edwardsiella phage PEi21]<>hypothetical protein [Edwardsiella phage PEi21]
Loki_gp22	29.63	486	296	14	54	516	45	507	2e-42	170	gi|448245158|ref|YP_007392876.1|;gi|429247691|gb|AFZ77609.1|	putative DNA polymerase [Klebsiella phage JD001]<>putative DNA polymerase [Klebsiella phage JD001]
Loki_gp22	28.19	564	330	21	53	569	44	579	2e-42	173	gi|1093424333|gb|AOZ65397.1|	putative DNA polymerase [Klebsiella phage vB_KpnM_KpV52]
Loki_gp22	26.98	645	384	14	48	629	3	623	1e-39	165	gi|1102617442|ref|YP_009321190.1|;gi|952093786|gb|ALN97175.1|;gi|1023494231|gb|ANB40466.1|	DNA polymerase [Flavobacterium phage Fpv3]<>DNA polymerase [Flavobacterium phage FpV4]<>DNA polymerase [Flavobacterium phage Fpv3]
Loki_gp22	25.83	573	370	18	54	596	7	554	9e-39	161	gi|1039202776|gb|OBQ43523.1|	hypothetical protein AN484_11935 [Aphanizomenon flos-aquae WA102]
Loki_gp22	24.66	665	412	22	53	646	4	650	1e-36	156	gi|1095226755|emb|SEW20892.1|	hypothetical protein SAMN05428988_3145 [Chitinophaga sp. YR573]
Loki_gp22	30.38	418	252	12	190	579	248	654	3e-35	152	gi|1049514679|gb|ANY57332.1|	polymerase [uncultured phage crAssphage]
Loki_gp22	30.29	416	255	12	190	579	248	654	4e-35	152	gi|1049514671|gb|ANY57328.1|	polymerase [uncultured phage crAssphage]
Loki_gp22	28.76	459	287	14	147	579	210	654	4e-35	152	gi|1049514683|gb|ANY57334.1|	polymerase [uncultured phage crAssphage]
[truncated: 1,269 more rows]

## Sheet: InterProScan
ORF	Checksum	Sequence length	Analysis	Signature Accession	Signature Description	Start	Stop	E-value	Status	InterPro Accession	InterPro Description	GO annotations	Pathways annotations
[truncated: 82 more rows]

[truncated: 3 more sheets: Pfam, hhsearch_pdb, hhsearch_pfam]
